# Supplementary material for: Development of a propionate metabolism-related gene-based molecular subtypes and scoring system for predicting prognosis in bladder cancer
Source: PubMed Central journal article supplement (PMC11285334; doi:10.1186/s40001-024-01982-6), 2024-07-29

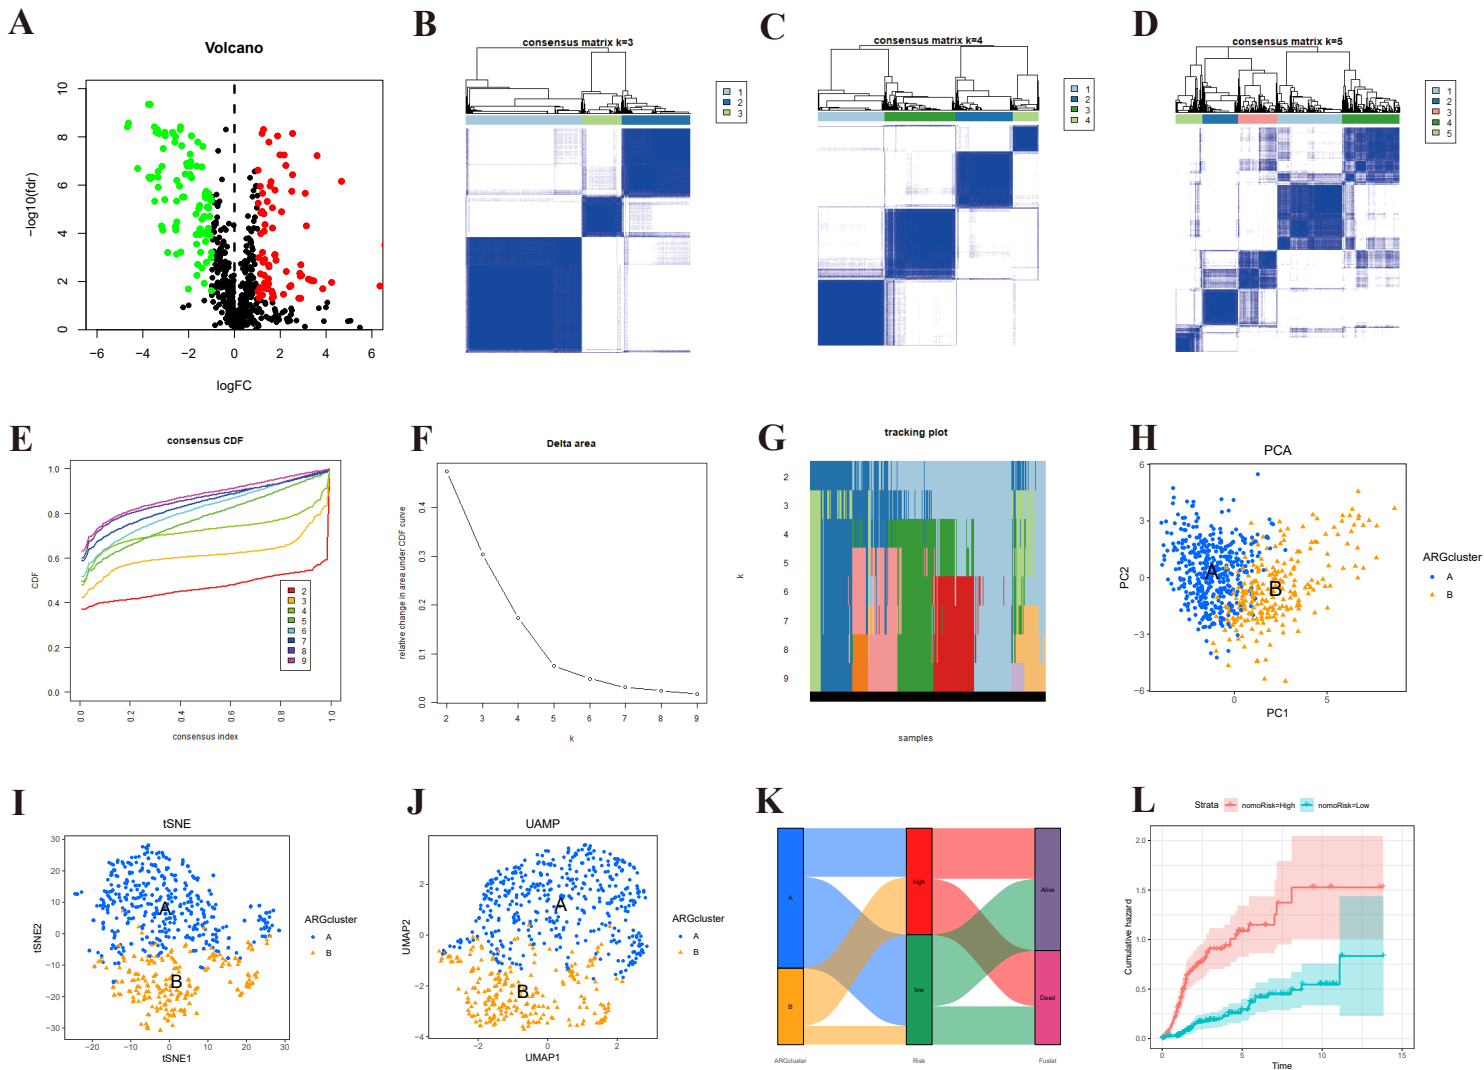

Supplement: 40001_2024_1982_MOESM2_ESM.pdf [file 40001_2024_1982_MOESM2_ESM.pdf]
