# Supplementary material for: Development of a propionate metabolism-related gene-based molecular subtypes and scoring system for predicting prognosis in bladder cancer
Source: PubMed Central journal article supplement (PMC11285334; doi:10.1186/s40001-024-01982-6), 2024-07-29
Supplement: 40001_2024_1982_MOESM6_ESM.pdf [file 40001_2024_1982_MOESM6_ESM.pdf]

**Supplementary Table 1 812 PMRGs obtained from the GeneCards database.**

| Gene Symbol | Description                                                        | Category       | Gifts | GC Id       | Relevance score | GeneCards Link                                                                                                                      |
|-------------|--------------------------------------------------------------------|----------------|-------|-------------|-----------------|-------------------------------------------------------------------------------------------------------------------------------------|
| PCCB        | Propionyl-CoA Carboxylase Subunit Beta                             | Protein Coding | 53    | GC03P136250 | 61.11257935     | <a href="https://www.genecards.org/cgi-bin/carddisp.pl?gene=PCCB">https://www.genecards.org/cgi-bin/carddisp.pl?gene=PCCB</a>       |
| PCCA        | Propionyl-CoA Carboxylase Subunit Alpha                            | Protein Coding | 53    | GC13P100089 | 56.12726974     | <a href="https://www.genecards.org/cgi-bin/carddisp.pl?gene=PCCA">https://www.genecards.org/cgi-bin/carddisp.pl?gene=PCCA</a>       |
| MMACHC      | Metabolism Of Cobalamin Associated C                               | Protein Coding | 50    | GC01P045500 | 47.25754929     | <a href="https://www.genecards.org/cgi-bin/carddisp.pl?gene=MMACHC">https://www.genecards.org/cgi-bin/carddisp.pl?gene=MMACHC</a>   |
| MTR         | 5-Methyltetrahydrofolate-Homocysteine Methyltransferase            | Protein Coding | 54    | GC01P236795 | 39.33602524     | <a href="https://www.genecards.org/cgi-bin/carddisp.pl?gene=MTR">https://www.genecards.org/cgi-bin/carddisp.pl?gene=MTR</a>         |
| CYP2D6      | Cytochrome P450 Family 2 Subfamily D Member 6                      | Protein Coding | 53    | GC22M042126 | 39.22632217     | <a href="https://www.genecards.org/cgi-bin/carddisp.pl?gene=CYP2D6">https://www.genecards.org/cgi-bin/carddisp.pl?gene=CYP2D6</a>   |
| MMADHC      | Metabolism Of Cobalamin Associated D                               | Protein Coding | 49    | GC02M149569 | 35.76113892     | <a href="https://www.genecards.org/cgi-bin/carddisp.pl?gene=MMADHC">https://www.genecards.org/cgi-bin/carddisp.pl?gene=MMADHC</a>   |
| CYP3A4      | Cytochrome P450 Family 3 Subfamily A Member 4                      | Protein Coding | 56    | GC07M099759 | 35.6474762      | <a href="https://www.genecards.org/cgi-bin/carddisp.pl?gene=CYP3A4">https://www.genecards.org/cgi-bin/carddisp.pl?gene=CYP3A4</a>   |
| CYP2C19     | Cytochrome P450 Family 2 Subfamily C Member 19                     | Protein Coding | 52    | GC10P094762 | 34.64389801     | <a href="https://www.genecards.org/cgi-bin/carddisp.pl?gene=CYP2C19">https://www.genecards.org/cgi-bin/carddisp.pl?gene=CYP2C19</a> |
| INS         | Insulin                                                            | Protein Coding | 55    | GC11M002159 | 33.82258224     | <a href="https://www.genecards.org/cgi-bin/carddisp.pl?gene=INS">https://www.genecards.org/cgi-bin/carddisp.pl?gene=INS</a>         |
| MMUT        | Methylmalonyl-CoA Mutase                                           | Protein Coding | 52    | GC06M049430 | 31.02311325     | <a href="https://www.genecards.org/cgi-bin/carddisp.pl?gene=MMUT">https://www.genecards.org/cgi-bin/carddisp.pl?gene=MMUT</a>       |
| ABCA3       | ATP Binding Cassette Subfamily A Member 3                          | Protein Coding | 55    | GC16M002275 | 30.44045639     | <a href="https://www.genecards.org/cgi-bin/carddisp.pl?gene=ABCA3">https://www.genecards.org/cgi-bin/carddisp.pl?gene=ABCA3</a>     |
| MMAA        | Metabolism Of Cobalamin Associated A                               | Protein Coding | 47    | GC04P145610 | 30.1062355      | <a href="https://www.genecards.org/cgi-bin/carddisp.pl?gene=MMAA">https://www.genecards.org/cgi-bin/carddisp.pl?gene=MMAA</a>       |
| UQCRFS1     | Ubiquinol-Cytochrome C Reductase, Rieske Iron-Sulfur Polypeptide 1 | Protein Coding | 53    | GC19M029205 | 30.09693146     | <a href="https://www.genecards.org/cgi-bin/carddisp.pl?gene=UQCRFS1">https://www.genecards.org/cgi-bin/carddisp.pl?gene=UQCRFS1</a> |
| ACADM       | Acyl-CoA Dehydrogenase Medium Chain                                | Protein Coding | 52    | GC01P075724 | 29.86544609     | <a href="https://www.genecards.org/cgi-bin/carddisp.pl?gene=ACADM">https://www.genecards.org/cgi-bin/carddisp.pl?gene=ACADM</a>     |

|        |                                                                   |                |    |             |             |                                                                                                                                             |
|--------|-------------------------------------------------------------------|----------------|----|-------------|-------------|---------------------------------------------------------------------------------------------------------------------------------------------|
| PPARG  | Peroxisome Proliferator Activated Receptor Gamma                  | Protein Coding | 60 | GC03P012287 | 29.00304985 | ne=ACADM<br><a href="https://www.genecards.org/cgi-bin/carddisp.pl?gene=PPARG">https://www.genecards.org/cgi-bin/carddisp.pl?gene=PPARG</a> |
| MTRR   | 5-Methyltetrahydrofolate-Homocysteine Methyltransferase Reductase | Protein Coding | 50 | GC05P007851 | 28.36356544 | <a href="https://www.genecards.org/cgi-bin/carddisp.pl?gene=MTRR">https://www.genecards.org/cgi-bin/carddisp.pl?gene=MTRR</a>               |
| LEP    | Leptin                                                            | Protein Coding | 53 | GC07P128241 | 28.21476173 | <a href="https://www.genecards.org/cgi-bin/carddisp.pl?gene=LEP">https://www.genecards.org/cgi-bin/carddisp.pl?gene=LEP</a>                 |
| MMAB   | Metabolism Of Cobalamin Associated B                              | Protein Coding | 51 | GC12M109553 | 28.03660583 | <a href="https://www.genecards.org/cgi-bin/carddisp.pl?gene=MMAB">https://www.genecards.org/cgi-bin/carddisp.pl?gene=MMAB</a>               |
| OTC    | Ornithine Transcarbamylase                                        | Protein Coding | 52 | GC0XP038353 | 26.92333984 | <a href="https://www.genecards.org/cgi-bin/carddisp.pl?gene=OTC">https://www.genecards.org/cgi-bin/carddisp.pl?gene=OTC</a>                 |
| CYP2C9 | Cytochrome P450 Family 2 Subfamily C Member 9                     | Protein Coding | 53 | GC10P094938 | 25.8538208  | <a href="https://www.genecards.org/cgi-bin/carddisp.pl?gene=CYP2C9">https://www.genecards.org/cgi-bin/carddisp.pl?gene=CYP2C9</a>           |
| LDLR   | Low Density Lipoprotein Receptor                                  | Protein Coding | 58 | GC19P011091 | 25.81306458 | <a href="https://www.genecards.org/cgi-bin/carddisp.pl?gene=LDLR">https://www.genecards.org/cgi-bin/carddisp.pl?gene=LDLR</a>               |
| ALB    | Albumin                                                           | Protein Coding | 56 | GC04P073397 | 25.16794777 | <a href="https://www.genecards.org/cgi-bin/carddisp.pl?gene=ALB">https://www.genecards.org/cgi-bin/carddisp.pl?gene=ALB</a>                 |
| CYP2C8 | Cytochrome P450 Family 2 Subfamily C Member 8                     | Protein Coding | 52 | GC10M095038 | 25.04213715 | <a href="https://www.genecards.org/cgi-bin/carddisp.pl?gene=CYP2C8">https://www.genecards.org/cgi-bin/carddisp.pl?gene=CYP2C8</a>           |
| APOE   | Apolipoprotein E                                                  | Protein Coding | 57 | GC19P073055 | 24.89061928 | <a href="https://www.genecards.org/cgi-bin/carddisp.pl?gene=APOE">https://www.genecards.org/cgi-bin/carddisp.pl?gene=APOE</a>               |
| ADIPOQ | Adiponectin, C1Q And Collagen Domain Containing                   | Protein Coding | 52 | GC03P186842 | 24.75322914 | <a href="https://www.genecards.org/cgi-bin/carddisp.pl?gene=ADIPOQ">https://www.genecards.org/cgi-bin/carddisp.pl?gene=ADIPOQ</a>           |
| CYP1A2 | Cytochrome P450 Family 1 Subfamily A Member 2                     | Protein Coding | 52 | GC15P074748 | 24.42164421 | <a href="https://www.genecards.org/cgi-bin/carddisp.pl?gene=CYP1A2">https://www.genecards.org/cgi-bin/carddisp.pl?gene=CYP1A2</a>           |
| IL6    | Interleukin 6                                                     | Protein Coding | 58 | GC07P022725 | 24.29815102 | <a href="https://www.genecards.org/cgi-bin/carddisp.pl?gene=IL6">https://www.genecards.org/cgi-bin/carddisp.pl?gene=IL6</a>                 |
| LIPC   | Lipase C, Hepatic Type                                            | Protein Coding | 52 | GC15P058410 | 24.07993889 | <a href="https://www.genecards.org/cgi-bin/carddisp.pl?gene=LIPC">https://www.genecards.org/cgi-bin/carddisp.pl?gene=LIPC</a>               |
| LPL    | Lipoprotein Lipase                                                | Protein Coding | 56 | GC08P019901 | 23.63115692 | <a href="https://www.genecards.org/cgi-bin/carddisp.pl?gene=LPL">https://www.genecards.org/cgi-bin/carddisp.pl?gene=LPL</a>                 |

|        |                                                    |                |    |             |             |                                                                                                                                   |
|--------|----------------------------------------------------|----------------|----|-------------|-------------|-----------------------------------------------------------------------------------------------------------------------------------|
| APOB   | Apolipoprotein B                                   | Protein Coding | 53 | GC02M020956 | 23.32738113 | <a href="https://www.genecards.org/cgi-bin/carddisp.pl?gene=APOB">https://www.genecards.org/cgi-bin/carddisp.pl?gene=APOB</a>     |
| UGT1A1 | UDP Glucuronosyltransferase Family 1 Member A1     | Protein Coding | 57 | GC02P233760 | 23.1049614  | <a href="https://www.genecards.org/cgi-bin/carddisp.pl?gene=UGT1A1">https://www.genecards.org/cgi-bin/carddisp.pl?gene=UGT1A1</a> |
| CYP1A1 | Cytochrome P450 Family 1 Subfamily A Member 1      | Protein Coding | 55 | GC15M074719 | 23.08771324 | <a href="https://www.genecards.org/cgi-bin/carddisp.pl?gene=CYP1A1">https://www.genecards.org/cgi-bin/carddisp.pl?gene=CYP1A1</a> |
| GCDH   | Glutaryl-CoA Dehydrogenase                         | Protein Coding | 52 | GC19P012891 | 23.0321064  | <a href="https://www.genecards.org/cgi-bin/carddisp.pl?gene=GCDH">https://www.genecards.org/cgi-bin/carddisp.pl?gene=GCDH</a>     |
| PPARA  | Peroxisome Proliferator Activated Receptor Alpha   | Protein Coding | 51 | GC22P046150 | 22.84316635 | <a href="https://www.genecards.org/cgi-bin/carddisp.pl?gene=PPARA">https://www.genecards.org/cgi-bin/carddisp.pl?gene=PPARA</a>   |
| CYP2B6 | Cytochrome P450 Family 2 Subfamily B Member 6      | Protein Coding | 52 | GC19P040991 | 22.70144463 | <a href="https://www.genecards.org/cgi-bin/carddisp.pl?gene=CYP2B6">https://www.genecards.org/cgi-bin/carddisp.pl?gene=CYP2B6</a> |
| IGF1   | Insulin Like Growth Factor 1                       | Protein Coding | 55 | GC12M102395 | 22.66413879 | <a href="https://www.genecards.org/cgi-bin/carddisp.pl?gene=IGF1">https://www.genecards.org/cgi-bin/carddisp.pl?gene=IGF1</a>     |
| CYP2A6 | Cytochrome P450 Family 2 Subfamily A Member 6      | Protein Coding | 53 | GC19M040843 | 22.56680679 | <a href="https://www.genecards.org/cgi-bin/carddisp.pl?gene=CYP2A6">https://www.genecards.org/cgi-bin/carddisp.pl?gene=CYP2A6</a> |
| TPMT   | Thiopurine S-Methyltransferase                     | Protein Coding | 53 | GC06M018128 | 22.38929176 | <a href="https://www.genecards.org/cgi-bin/carddisp.pl?gene=TPMT">https://www.genecards.org/cgi-bin/carddisp.pl?gene=TPMT</a>     |
| CBS    | Cystathionine Beta-Synthase                        | Protein Coding | 56 | GC21M043053 | 22.33657455 | <a href="https://www.genecards.org/cgi-bin/carddisp.pl?gene=CBS">https://www.genecards.org/cgi-bin/carddisp.pl?gene=CBS</a>       |
| TNF    | Tumor Necrosis Factor                              | Protein Coding | 59 | GC06P092154 | 21.97315598 | <a href="https://www.genecards.org/cgi-bin/carddisp.pl?gene=TNF">https://www.genecards.org/cgi-bin/carddisp.pl?gene=TNF</a>       |
| HMGCL  | 3-Hydroxy-3-Methylglutaryl-CoA Lyase               | Protein Coding | 51 | GC01M023801 | 21.91726685 | <a href="https://www.genecards.org/cgi-bin/carddisp.pl?gene=HMGCL">https://www.genecards.org/cgi-bin/carddisp.pl?gene=HMGCL</a>   |
| CYP2E1 | Cytochrome P450 Family 2 Subfamily E Member 1      | Protein Coding | 52 | GC10P133520 | 21.77449989 | <a href="https://www.genecards.org/cgi-bin/carddisp.pl?gene=CYP2E1">https://www.genecards.org/cgi-bin/carddisp.pl?gene=CYP2E1</a> |
| CSF2RA | Colony Stimulating Factor 2 Receptor Subunit Alpha | Protein Coding | 52 | GC0XP001845 | 21.42407227 | <a href="https://www.genecards.org/cgi-bin/carddisp.pl?gene=CSF2RA">https://www.genecards.org/cgi-bin/carddisp.pl?gene=CSF2RA</a> |
| PAH    | Phenylalanine Hydroxylase                          | Protein Coding | 55 | GC12M102836 | 21.21108818 | <a href="https://www.genecards.org/cgi-bin/carddisp.pl?gene=PAH">https://www.genecards.org/cgi-bin/carddisp.pl?gene=PAH</a>       |

|        |                                                                               |                |    |             |             |                                                                                                                                   |
|--------|-------------------------------------------------------------------------------|----------------|----|-------------|-------------|-----------------------------------------------------------------------------------------------------------------------------------|
| CYP3A5 | Cytochrome P450 Family 3 Subfamily A Member 5                                 | Protein Coding | 51 | GC07M099648 | 21.14499283 | <a href="https://www.genecards.org/cgi-bin/carddisp.pl?gene=CYP3A5">https://www.genecards.org/cgi-bin/carddisp.pl?gene=CYP3A5</a> |
| BTD    | Biotinidase                                                                   | Protein Coding | 52 | GC03P017386 | 21.06881714 | <a href="https://www.genecards.org/cgi-bin/carddisp.pl?gene=BTD">https://www.genecards.org/cgi-bin/carddisp.pl?gene=BTD</a>       |
| GHRL   | Ghrelin And Obestatin Prepropeptide                                           | Protein Coding | 49 | GC03M010285 | 20.99878693 | <a href="https://www.genecards.org/cgi-bin/carddisp.pl?gene=GHRL">https://www.genecards.org/cgi-bin/carddisp.pl?gene=GHRL</a>     |
| SFTPB  | Surfactant Protein B                                                          | Protein Coding | 51 | GC02M085657 | 20.57275009 | <a href="https://www.genecards.org/cgi-bin/carddisp.pl?gene=SFTPB">https://www.genecards.org/cgi-bin/carddisp.pl?gene=SFTPB</a>   |
| ACADVL | Acyl-CoA Dehydrogenase Very Long Chain                                        | Protein Coding | 51 | GC17P007219 | 20.4634285  | <a href="https://www.genecards.org/cgi-bin/carddisp.pl?gene=ACADVL">https://www.genecards.org/cgi-bin/carddisp.pl?gene=ACADVL</a> |
| CPT2   | Carnitine Palmitoyltransferase 2                                              | Protein Coding | 56 | GC01P053196 | 20.11322403 | <a href="https://www.genecards.org/cgi-bin/carddisp.pl?gene=CPT2">https://www.genecards.org/cgi-bin/carddisp.pl?gene=CPT2</a>     |
| HADHA  | Hydroxyacyl-CoA Dehydrogenase Trifunctional Multienzyme Complex Subunit Alpha | Protein Coding | 52 | GC02M026190 | 20.02347183 | <a href="https://www.genecards.org/cgi-bin/carddisp.pl?gene=HADHA">https://www.genecards.org/cgi-bin/carddisp.pl?gene=HADHA</a>   |
| ETFDH  | Electron Transfer Flavoprotein Dehydrogenase                                  | Protein Coding | 52 | GC04P158672 | 19.88984299 | <a href="https://www.genecards.org/cgi-bin/carddisp.pl?gene=ETFDH">https://www.genecards.org/cgi-bin/carddisp.pl?gene=ETFDH</a>   |
| ACADS  | Acyl-CoA Dehydrogenase Short Chain                                            | Protein Coding | 52 | GC12P126959 | 19.86980438 | <a href="https://www.genecards.org/cgi-bin/carddisp.pl?gene=ACADS">https://www.genecards.org/cgi-bin/carddisp.pl?gene=ACADS</a>   |
| PC     | Pyruvate Carboxylase                                                          | Protein Coding | 53 | GC11M066848 | 19.85100937 | <a href="https://www.genecards.org/cgi-bin/carddisp.pl?gene=PC">https://www.genecards.org/cgi-bin/carddisp.pl?gene=PC</a>         |
| ADSL   | Adenylosuccinate Lyase                                                        | Protein Coding | 54 | GC22P040346 | 19.84980774 | <a href="https://www.genecards.org/cgi-bin/carddisp.pl?gene=ADSL">https://www.genecards.org/cgi-bin/carddisp.pl?gene=ADSL</a>     |
| CRP    | C-Reactive Protein                                                            | Protein Coding | 53 | GC01M159729 | 19.67492294 | <a href="https://www.genecards.org/cgi-bin/carddisp.pl?gene=CRP">https://www.genecards.org/cgi-bin/carddisp.pl?gene=CRP</a>       |
| GGT1   | Gamma-Glutamyltransferase 1                                                   | Protein Coding | 56 | GC22P024583 | 19.48277092 | <a href="https://www.genecards.org/cgi-bin/carddisp.pl?gene=GGT1">https://www.genecards.org/cgi-bin/carddisp.pl?gene=GGT1</a>     |
| NR3C1  | Nuclear Receptor Subfamily 3 Group C Member 1                                 | Protein Coding | 56 | GC05M143277 | 19.25010681 | <a href="https://www.genecards.org/cgi-bin/carddisp.pl?gene=NR3C1">https://www.genecards.org/cgi-bin/carddisp.pl?gene=NR3C1</a>   |
| BGLAP  | Bone Gamma-Carboxyglutamate Protein                                           | Protein Coding | 46 | GC01P156242 | 18.94005585 | <a href="https://www.genecards.org/cgi-bin/carddisp.pl?gene=BGLAP">https://www.genecards.org/cgi-bin/carddisp.pl?gene=BGLAP</a>   |

|        |                                                        |                |    |             |             |                                                                                                                                   |
|--------|--------------------------------------------------------|----------------|----|-------------|-------------|-----------------------------------------------------------------------------------------------------------------------------------|
| INSR   | Insulin Receptor                                       | Protein Coding | 60 | GC19M007112 | 18.79404449 | <a href="https://www.genecards.org/cgi-bin/carddisp.pl?gene=INSR">https://www.genecards.org/cgi-bin/carddisp.pl?gene=INSR</a>     |
| CPT1A  | Carnitine Palmitoyltransferase 1A                      | Protein Coding | 55 | GC11M068754 | 18.33993149 | <a href="https://www.genecards.org/cgi-bin/carddisp.pl?gene=CPT1A">https://www.genecards.org/cgi-bin/carddisp.pl?gene=CPT1A</a>   |
| APOA1  | Apolipoprotein A1                                      | Protein Coding | 57 | GC11M116835 | 18.12685776 | <a href="https://www.genecards.org/cgi-bin/carddisp.pl?gene=APOA1">https://www.genecards.org/cgi-bin/carddisp.pl?gene=APOA1</a>   |
| BCKDHB | Branched Chain Keto Acid Dehydrogenase E1 Subunit Beta | Protein Coding | 50 | GC06P080106 | 18.03951263 | <a href="https://www.genecards.org/cgi-bin/carddisp.pl?gene=BCKDHB">https://www.genecards.org/cgi-bin/carddisp.pl?gene=BCKDHB</a> |
| AKT1   | AKT Serine/Threonine Kinase 1                          | Protein Coding | 61 | GC14M104769 | 17.96221733 | <a href="https://www.genecards.org/cgi-bin/carddisp.pl?gene=AKT1">https://www.genecards.org/cgi-bin/carddisp.pl?gene=AKT1</a>     |
| TP53   | Tumor Protein P53                                      | Protein Coding | 60 | GC17M007661 | 17.83651924 | <a href="https://www.genecards.org/cgi-bin/carddisp.pl?gene=TP53">https://www.genecards.org/cgi-bin/carddisp.pl?gene=TP53</a>     |
| CES1   | Carboxylesterase 1                                     | Protein Coding | 55 | GC16M055836 | 17.61368179 | <a href="https://www.genecards.org/cgi-bin/carddisp.pl?gene=CES1">https://www.genecards.org/cgi-bin/carddisp.pl?gene=CES1</a>     |
| HNF4A  | Hepatocyte Nuclear Factor 4 Alpha                      | Protein Coding | 56 | GC20P044355 | 17.52772713 | <a href="https://www.genecards.org/cgi-bin/carddisp.pl?gene=HNF4A">https://www.genecards.org/cgi-bin/carddisp.pl?gene=HNF4A</a>   |
| ABCD4  | ATP Binding Cassette Subfamily D Member 4              | Protein Coding | 50 | GC14M074285 | 17.33675766 | <a href="https://www.genecards.org/cgi-bin/carddisp.pl?gene=ABCD4">https://www.genecards.org/cgi-bin/carddisp.pl?gene=ABCD4</a>   |
| UGT1A6 | UDP Glucuronosyltransferase Family 1 Member A6         | Protein Coding | 48 | GC02P233691 | 17.17436981 | <a href="https://www.genecards.org/cgi-bin/carddisp.pl?gene=UGT1A6">https://www.genecards.org/cgi-bin/carddisp.pl?gene=UGT1A6</a> |
| ASS1   | Argininosuccinate Synthase 1                           | Protein Coding | 56 | GC09P130444 | 17.09732819 | <a href="https://www.genecards.org/cgi-bin/carddisp.pl?gene=ASS1">https://www.genecards.org/cgi-bin/carddisp.pl?gene=ASS1</a>     |
| MCEE   | Methylmalonyl-CoA Epimerase                            | Protein Coding | 47 | GC02M071110 | 17.0945816  | <a href="https://www.genecards.org/cgi-bin/carddisp.pl?gene=MCEE">https://www.genecards.org/cgi-bin/carddisp.pl?gene=MCEE</a>     |
| HLCS   | Holocarboxylase Synthetase                             | Protein Coding | 48 | GC21M036750 | 17.08519173 | <a href="https://www.genecards.org/cgi-bin/carddisp.pl?gene=HLCS">https://www.genecards.org/cgi-bin/carddisp.pl?gene=HLCS</a>     |
| POMC   | Proopiomelanocortin                                    | Protein Coding | 55 | GC02M025160 | 16.98484993 | <a href="https://www.genecards.org/cgi-bin/carddisp.pl?gene=POMC">https://www.genecards.org/cgi-bin/carddisp.pl?gene=POMC</a>     |
| ACE    | Angiotensin I Converting Enzyme                        | Protein Coding | 59 | GC17P063477 | 16.94721031 | <a href="https://www.genecards.org/cgi-bin/carddisp.pl?gene=ACE">https://www.genecards.org/cgi-bin/carddisp.pl?gene=ACE</a>       |

|         |                                               |                |    |             |             |                                                                                                                                     |
|---------|-----------------------------------------------|----------------|----|-------------|-------------|-------------------------------------------------------------------------------------------------------------------------------------|
| IVD     | Isovaleryl-CoA Dehydrogenase                  | Protein Coding | 51 | GC15P040405 | 16.93725967 | <a href="https://www.genecards.org/cgi-bin/carddisp.pl?gene=IVD">https://www.genecards.org/cgi-bin/carddisp.pl?gene=IVD</a>         |
| HIBCH   | 3-Hydroxyisobutyryl-CoA Hydrolase             | Protein Coding | 50 | GC02M190189 | 16.7645874  | <a href="https://www.genecards.org/cgi-bin/carddisp.pl?gene=HIBCH">https://www.genecards.org/cgi-bin/carddisp.pl?gene=HIBCH</a>     |
| NAGS    | N-Acetylglutamate Synthase                    | Protein Coding | 47 | GC17P044004 | 16.73843575 | <a href="https://www.genecards.org/cgi-bin/carddisp.pl?gene=NAGS">https://www.genecards.org/cgi-bin/carddisp.pl?gene=NAGS</a>       |
| LMBRD1  | LMBR1 Domain Containing 1                     | Protein Coding | 47 | GC06M072251 | 16.69300079 | <a href="https://www.genecards.org/cgi-bin/carddisp.pl?gene=LMBRD1">https://www.genecards.org/cgi-bin/carddisp.pl?gene=LMBRD1</a>   |
| SLC2A1  | Solute Carrier Family 2 Member 1              | Protein Coding | 60 | GC01M042925 | 16.59392548 | <a href="https://www.genecards.org/cgi-bin/carddisp.pl?gene=SLC2A1">https://www.genecards.org/cgi-bin/carddisp.pl?gene=SLC2A1</a>   |
| CETP    | Cholesteryl Ester Transfer Protein            | Protein Coding | 53 | GC16P056961 | 16.59146118 | <a href="https://www.genecards.org/cgi-bin/carddisp.pl?gene=CETP">https://www.genecards.org/cgi-bin/carddisp.pl?gene=CETP</a>       |
| CPS1    | Carbamoyl-Phosphate Synthase 1                | Protein Coding | 55 | GC02P210477 | 16.44989777 | <a href="https://www.genecards.org/cgi-bin/carddisp.pl?gene=CPS1">https://www.genecards.org/cgi-bin/carddisp.pl?gene=CPS1</a>       |
| CYP1B1  | Cytochrome P450 Family 1 Subfamily B Member 1 | Protein Coding | 54 | GC02M038066 | 16.42423248 | <a href="https://www.genecards.org/cgi-bin/carddisp.pl?gene=CYP1B1">https://www.genecards.org/cgi-bin/carddisp.pl?gene=CYP1B1</a>   |
| SLC22A5 | Solute Carrier Family 22 Member 5             | Protein Coding | 53 | GC05P132369 | 16.36189461 | <a href="https://www.genecards.org/cgi-bin/carddisp.pl?gene=SLC22A5">https://www.genecards.org/cgi-bin/carddisp.pl?gene=SLC22A5</a> |
| GPT     | Glutamic--Pyruvic Transaminase                | Protein Coding | 48 | GC08P144502 | 16.35798264 | <a href="https://www.genecards.org/cgi-bin/carddisp.pl?gene=GPT">https://www.genecards.org/cgi-bin/carddisp.pl?gene=GPT</a>         |
| GLDC    | Glycine Decarboxylase                         | Protein Coding | 53 | GC09M006522 | 16.15870285 | <a href="https://www.genecards.org/cgi-bin/carddisp.pl?gene=GLDC">https://www.genecards.org/cgi-bin/carddisp.pl?gene=GLDC</a>       |
| IL1B    | Interleukin 1 Beta                            | Protein Coding | 54 | GC02M112829 | 16.14551735 | <a href="https://www.genecards.org/cgi-bin/carddisp.pl?gene=IL1B">https://www.genecards.org/cgi-bin/carddisp.pl?gene=IL1B</a>       |
| VDR     | Vitamin D Receptor                            | Protein Coding | 56 | GC12M047841 | 16.03931808 | <a href="https://www.genecards.org/cgi-bin/carddisp.pl?gene=VDR">https://www.genecards.org/cgi-bin/carddisp.pl?gene=VDR</a>         |
| FH      | Fumarate Hydratase                            | Protein Coding | 53 | GC01M241499 | 15.98605347 | <a href="https://www.genecards.org/cgi-bin/carddisp.pl?gene=FH">https://www.genecards.org/cgi-bin/carddisp.pl?gene=FH</a>           |
| PRODH   | Proline Dehydrogenase 1                       | Protein Coding | 52 | GC22M018912 | 15.97478485 | <a href="https://www.genecards.org/cgi-bin/carddisp.pl?gene=PRODH">https://www.genecards.org/cgi-bin/carddisp.pl?gene=PRODH</a>     |

|         |                                                    |                |    |             |             |                                                                                                                                     |
|---------|----------------------------------------------------|----------------|----|-------------|-------------|-------------------------------------------------------------------------------------------------------------------------------------|
| CYP7A1  | Cytochrome P450 Family 7 Subfamily A Member 1      | Protein Coding | 49 | GC08M058476 | 15.92755032 | <a href="https://www.genecards.org/cgi-bin/carddisp.pl?gene=CYP7A1">https://www.genecards.org/cgi-bin/carddisp.pl?gene=CYP7A1</a>   |
| HSD11B1 | Hydroxysteroid 11-Beta Dehydrogenase 1             | Protein Coding | 58 | GC01P209686 | 15.90985107 | <a href="https://www.genecards.org/cgi-bin/carddisp.pl?gene=HSD11B1">https://www.genecards.org/cgi-bin/carddisp.pl?gene=HSD11B1</a> |
| ENPP1   | Ectonucleotide Pyrophosphatase/Phosphodiesterase 1 | Protein Coding | 56 | GC06P131808 | 15.89481449 | <a href="https://www.genecards.org/cgi-bin/carddisp.pl?gene=ENPP1">https://www.genecards.org/cgi-bin/carddisp.pl?gene=ENPP1</a>     |
| HSD11B2 | Hydroxysteroid 11-Beta Dehydrogenase 2             | Protein Coding | 52 | GC16P067433 | 15.8716507  | <a href="https://www.genecards.org/cgi-bin/carddisp.pl?gene=HSD11B2">https://www.genecards.org/cgi-bin/carddisp.pl?gene=HSD11B2</a> |
| CYP27B1 | Cytochrome P450 Family 27 Subfamily B Member 1     | Protein Coding | 52 | GC12M057790 | 15.85970306 | <a href="https://www.genecards.org/cgi-bin/carddisp.pl?gene=CYP27B1">https://www.genecards.org/cgi-bin/carddisp.pl?gene=CYP27B1</a> |
| XDH     | Xanthine Dehydrogenase                             | Protein Coding | 54 | GC02M031334 | 15.85227299 | <a href="https://www.genecards.org/cgi-bin/carddisp.pl?gene=XDH">https://www.genecards.org/cgi-bin/carddisp.pl?gene=XDH</a>         |
| RETN    | Resistin                                           | Protein Coding | 49 | GC19P007669 | 15.76069736 | <a href="https://www.genecards.org/cgi-bin/carddisp.pl?gene=RETN">https://www.genecards.org/cgi-bin/carddisp.pl?gene=RETN</a>       |
| ABCB1   | ATP Binding Cassette Subfamily B Member 1          | Protein Coding | 57 | GC07M087504 | 15.75623131 | <a href="https://www.genecards.org/cgi-bin/carddisp.pl?gene=ABCB1">https://www.genecards.org/cgi-bin/carddisp.pl?gene=ABCB1</a>     |
| CA5A    | Carbonic Anhydrase 5A                              | Protein Coding | 50 | GC16M087882 | 15.74926186 | <a href="https://www.genecards.org/cgi-bin/carddisp.pl?gene=CA5A">https://www.genecards.org/cgi-bin/carddisp.pl?gene=CA5A</a>       |
| MAT1A   | Methionine Adenosyltransferase 1A                  | Protein Coding | 52 | GC10M080271 | 15.67016792 | <a href="https://www.genecards.org/cgi-bin/carddisp.pl?gene=MAT1A">https://www.genecards.org/cgi-bin/carddisp.pl?gene=MAT1A</a>     |
| LEPR    | Leptin Receptor                                    | Protein Coding | 57 | GC01P065421 | 15.63416672 | <a href="https://www.genecards.org/cgi-bin/carddisp.pl?gene=LEPR">https://www.genecards.org/cgi-bin/carddisp.pl?gene=LEPR</a>       |
| IRS1    | Insulin Receptor Substrate 1                       | Protein Coding | 53 | GC02M226731 | 15.51399326 | <a href="https://www.genecards.org/cgi-bin/carddisp.pl?gene=IRS1">https://www.genecards.org/cgi-bin/carddisp.pl?gene=IRS1</a>       |
| UGT1A8  | UDP Glucuronosyltransferase Family 1 Member A8     | Protein Coding | 43 | GC02P233618 | 15.4636898  | <a href="https://www.genecards.org/cgi-bin/carddisp.pl?gene=UGT1A8">https://www.genecards.org/cgi-bin/carddisp.pl?gene=UGT1A8</a>   |
| GAMT    | Guanidinoacetate N-Methyltransferase               | Protein Coding | 52 | GC19M001397 | 15.44042587 | <a href="https://www.genecards.org/cgi-bin/carddisp.pl?gene=GAMT">https://www.genecards.org/cgi-bin/carddisp.pl?gene=GAMT</a>       |
| ABCA1   | ATP Binding Cassette Subfamily A Member 1          | Protein Coding | 55 | GC09M104781 | 15.39727402 | <a href="https://www.genecards.org/cgi-bin/carddisp.pl?gene=ABCA1">https://www.genecards.org/cgi-bin/carddisp.pl?gene=ABCA1</a>     |

|         |                                                            |                |    |             |             |                                                                                                                                     |
|---------|------------------------------------------------------------|----------------|----|-------------|-------------|-------------------------------------------------------------------------------------------------------------------------------------|
| UGT1A9  | UDP Glucuronosyltransferase Family 1 Member A9             | Protein Coding | 51 | GC02P233671 | 15.35033798 | <a href="https://www.genecards.org/cgi-bin/carddisp.pl?gene=UGT1A9">https://www.genecards.org/cgi-bin/carddisp.pl?gene=UGT1A9</a>   |
| GALT    | Galactose-1-Phosphate Uridyltransferase                    | Protein Coding | 53 | GC09P048949 | 15.34730434 | <a href="https://www.genecards.org/cgi-bin/carddisp.pl?gene=GALT">https://www.genecards.org/cgi-bin/carddisp.pl?gene=GALT</a>       |
| FGF23   | Fibroblast Growth Factor 23                                | Protein Coding | 52 | GC12M004368 | 15.22850227 | <a href="https://www.genecards.org/cgi-bin/carddisp.pl?gene=FGF23">https://www.genecards.org/cgi-bin/carddisp.pl?gene=FGF23</a>     |
| CYP17A1 | Cytochrome P450 Family 17 Subfamily A Member 1             | Protein Coding | 55 | GC10M102830 | 15.21972752 | <a href="https://www.genecards.org/cgi-bin/carddisp.pl?gene=CYP17A1">https://www.genecards.org/cgi-bin/carddisp.pl?gene=CYP17A1</a> |
| G6PC1   | Glucose-6-Phosphatase Catalytic Subunit 1                  | Protein Coding | 51 | GC17P063334 | 15.16344547 | <a href="https://www.genecards.org/cgi-bin/carddisp.pl?gene=G6PC1">https://www.genecards.org/cgi-bin/carddisp.pl?gene=G6PC1</a>     |
| HFE     | Homeostatic Iron Regulator                                 | Protein Coding | 52 | GC06P026087 | 15.10912323 | <a href="https://www.genecards.org/cgi-bin/carddisp.pl?gene=HFE">https://www.genecards.org/cgi-bin/carddisp.pl?gene=HFE</a>         |
| APOC3   | Apolipoprotein C3                                          | Protein Coding | 52 | GC11P116829 | 15.01816845 | <a href="https://www.genecards.org/cgi-bin/carddisp.pl?gene=APOC3">https://www.genecards.org/cgi-bin/carddisp.pl?gene=APOC3</a>     |
| FASN    | Fatty Acid Synthase                                        | Protein Coding | 55 | GC17M082078 | 15.00522327 | <a href="https://www.genecards.org/cgi-bin/carddisp.pl?gene=FASN">https://www.genecards.org/cgi-bin/carddisp.pl?gene=FASN</a>       |
| DPYD    | Dihydropyrimidine Dehydrogenase                            | Protein Coding | 59 | GC01M097015 | 14.99942017 | <a href="https://www.genecards.org/cgi-bin/carddisp.pl?gene=DPYD">https://www.genecards.org/cgi-bin/carddisp.pl?gene=DPYD</a>       |
| BCKDHA  | Branched Chain Keto Acid Dehydrogenase E1 Subunit Alpha    | Protein Coding | 51 | GC19P072922 | 14.99351788 | <a href="https://www.genecards.org/cgi-bin/carddisp.pl?gene=BCKDHA">https://www.genecards.org/cgi-bin/carddisp.pl?gene=BCKDHA</a>   |
| ADRB2   | Adrenoceptor Beta 2                                        | Protein Coding | 56 | GC05P148825 | 14.96682453 | <a href="https://www.genecards.org/cgi-bin/carddisp.pl?gene=ADRB2">https://www.genecards.org/cgi-bin/carddisp.pl?gene=ADRB2</a>     |
| ALDH2   | Aldehyde Dehydrogenase 2 Family Member                     | Protein Coding | 57 | GC12P111766 | 14.95112228 | <a href="https://www.genecards.org/cgi-bin/carddisp.pl?gene=ALDH2">https://www.genecards.org/cgi-bin/carddisp.pl?gene=ALDH2</a>     |
| NR3C2   | Nuclear Receptor Subfamily 3 Group C Member 2              | Protein Coding | 52 | GC04M148078 | 14.85720921 | <a href="https://www.genecards.org/cgi-bin/carddisp.pl?gene=NR3C2">https://www.genecards.org/cgi-bin/carddisp.pl?gene=NR3C2</a>     |
| SLCO1B1 | Solute Carrier Organic Anion Transporter Family Member 1B1 | Protein Coding | 55 | GC12P023907 | 14.79038334 | <a href="https://www.genecards.org/cgi-bin/carddisp.pl?gene=SLCO1B1">https://www.genecards.org/cgi-bin/carddisp.pl?gene=SLCO1B1</a> |
| HCFC1   | Host Cell Factor C1                                        | Protein Coding | 53 | GC0XM153947 | 14.77022457 | <a href="https://www.genecards.org/cgi-bin/carddisp.pl?gene=HCFC1">https://www.genecards.org/cgi-bin/carddisp.pl?gene=HCFC1</a>     |

|          |                                                |                |    |             |             |                                                                                                                                       |
|----------|------------------------------------------------|----------------|----|-------------|-------------|---------------------------------------------------------------------------------------------------------------------------------------|
| IL10     | Interleukin 10                                 | Protein Coding | 55 | GC01M206767 | 14.64819908 | <a href="https://www.genecards.org/cgi-bin/carddisp.pl?gene=IL10">https://www.genecards.org/cgi-bin/carddisp.pl?gene=IL10</a>         |
| CASR     | Calcium Sensing Receptor                       | Protein Coding | 57 | GC03P122183 | 14.60171509 | <a href="https://www.genecards.org/cgi-bin/carddisp.pl?gene=CASR">https://www.genecards.org/cgi-bin/carddisp.pl?gene=CASR</a>         |
| GCG      | Glucagon                                       | Protein Coding | 48 | GC02M162142 | 14.56726742 | <a href="https://www.genecards.org/cgi-bin/carddisp.pl?gene=GCG">https://www.genecards.org/cgi-bin/carddisp.pl?gene=GCG</a>           |
| PCSK9    | Proprotein Convertase Subtilisin/Kexin Type 9  | Protein Coding | 57 | GC01P055039 | 14.51441669 | <a href="https://www.genecards.org/cgi-bin/carddisp.pl?gene=PCSK9">https://www.genecards.org/cgi-bin/carddisp.pl?gene=PCSK9</a>       |
| HSD17B10 | Hydroxysteroid 17-Beta Dehydrogenase 10        | Protein Coding | 53 | GC0XM053431 | 14.5091486  | <a href="https://www.genecards.org/cgi-bin/carddisp.pl?gene=HSD17B10">https://www.genecards.org/cgi-bin/carddisp.pl?gene=HSD17B10</a> |
| SHBG     | Sex Hormone Binding Globulin                   | Protein Coding | 48 | GC17P007613 | 14.43100166 | <a href="https://www.genecards.org/cgi-bin/carddisp.pl?gene=SHBG">https://www.genecards.org/cgi-bin/carddisp.pl?gene=SHBG</a>         |
| SLC2A4   | Solute Carrier Family 2 Member 4               | Protein Coding | 52 | GC17P011713 | 14.34994125 | <a href="https://www.genecards.org/cgi-bin/carddisp.pl?gene=SLC2A4">https://www.genecards.org/cgi-bin/carddisp.pl?gene=SLC2A4</a>     |
| CYP19A1  | Cytochrome P450 Family 19 Subfamily A Member 1 | Protein Coding | 55 | GC15M051208 | 14.28239822 | <a href="https://www.genecards.org/cgi-bin/carddisp.pl?gene=CYP19A1">https://www.genecards.org/cgi-bin/carddisp.pl?gene=CYP19A1</a>   |
| HPD      | 4-Hydroxyphenylpyruvate Dioxygenase            | Protein Coding | 52 | GC12M121839 | 14.13055611 | <a href="https://www.genecards.org/cgi-bin/carddisp.pl?gene=HPD">https://www.genecards.org/cgi-bin/carddisp.pl?gene=HPD</a>           |
| HIF1A    | Hypoxia Inducible Factor 1 Subunit Alpha       | Protein Coding | 54 | GC14P061695 | 14.09283161 | <a href="https://www.genecards.org/cgi-bin/carddisp.pl?gene=HIF1A">https://www.genecards.org/cgi-bin/carddisp.pl?gene=HIF1A</a>       |
| VKORC1   | Vitamin K Epoxide Reductase Complex Subunit 1  | Protein Coding | 54 | GC16M038547 | 14.08553123 | <a href="https://www.genecards.org/cgi-bin/carddisp.pl?gene=VKORC1">https://www.genecards.org/cgi-bin/carddisp.pl?gene=VKORC1</a>     |
| AHCY     | Adenosylhomocysteinase                         | Protein Coding | 56 | GC20M034942 | 14.07678223 | <a href="https://www.genecards.org/cgi-bin/carddisp.pl?gene=AHCY">https://www.genecards.org/cgi-bin/carddisp.pl?gene=AHCY</a>         |
| FBP1     | Fructose-Bisphosphatase 1                      | Protein Coding | 56 | GC09M094603 | 14.06463623 | <a href="https://www.genecards.org/cgi-bin/carddisp.pl?gene=FBP1">https://www.genecards.org/cgi-bin/carddisp.pl?gene=FBP1</a>         |
| NOS3     | Nitric Oxide Synthase 3                        | Protein Coding | 56 | GC07P150990 | 14.06137276 | <a href="https://www.genecards.org/cgi-bin/carddisp.pl?gene=NOS3">https://www.genecards.org/cgi-bin/carddisp.pl?gene=NOS3</a>         |
| ALDH5A1  | Aldehyde Dehydrogenase 5 Family Member A1      | Protein Coding | 54 | GC06P024494 | 14.05005932 | <a href="https://www.genecards.org/cgi-bin/carddisp.pl?gene=ALDH5A1">https://www.genecards.org/cgi-bin/carddisp.pl?gene=ALDH5A1</a>   |

|       |                                                  |                |    |             |             |                                                                                                                                     |
|-------|--------------------------------------------------|----------------|----|-------------|-------------|-------------------------------------------------------------------------------------------------------------------------------------|
| FTCD  | Formimidoyltransferase Cyclodeaminase            | Protein Coding | 49 | GC21M051374 | 14.04514503 | <a href="https://www.genecards.org/cgi-bin/carddisp.pl?gene=ALDH5A1">https://www.genecards.org/cgi-bin/carddisp.pl?gene=ALDH5A1</a> |
| LDHA  | Lactate Dehydrogenase A                          | Protein Coding | 57 | GC11P018394 | 14.0241642  | <a href="https://www.genecards.org/cgi-bin/carddisp.pl?gene=FTCD">https://www.genecards.org/cgi-bin/carddisp.pl?gene=FTCD</a>       |
| PTH   | Parathyroid Hormone                              | Protein Coding | 52 | GC11M013492 | 14.01707935 | <a href="https://www.genecards.org/cgi-bin/carddisp.pl?gene=LDHA">https://www.genecards.org/cgi-bin/carddisp.pl?gene=LDHA</a>       |
| PPARD | Peroxisome Proliferator Activated Receptor Delta | Protein Coding | 52 | GC06P092273 | 13.99849129 | <a href="https://www.genecards.org/cgi-bin/carddisp.pl?gene=PTH">https://www.genecards.org/cgi-bin/carddisp.pl?gene=PTH</a>         |
| UCP2  | Uncoupling Protein 2                             | Protein Coding | 52 | GC11M073974 | 13.88011551 | <a href="https://www.genecards.org/cgi-bin/carddisp.pl?gene=PPARD">https://www.genecards.org/cgi-bin/carddisp.pl?gene=PPARD</a>     |
| GSTP1 | Glutathione S-Transferase Pi 1                   | Protein Coding | 57 | GC11P067583 | 13.80813503 | <a href="https://www.genecards.org/cgi-bin/carddisp.pl?gene=UCP2">https://www.genecards.org/cgi-bin/carddisp.pl?gene=UCP2</a>       |
| ESR1  | Estrogen Receptor 1                              | Protein Coding | 61 | GC06P151656 | 13.80347061 | <a href="https://www.genecards.org/cgi-bin/carddisp.pl?gene=GSTP1">https://www.genecards.org/cgi-bin/carddisp.pl?gene=GSTP1</a>     |
| PTGS2 | Prostaglandin-Endoperoxide Synthase 2            | Protein Coding | 56 | GC01M186671 | 13.66300106 | <a href="https://www.genecards.org/cgi-bin/carddisp.pl?gene=ESR1">https://www.genecards.org/cgi-bin/carddisp.pl?gene=ESR1</a>       |
| PON1  | Paraoxonase 1                                    | Protein Coding | 55 | GC07M095297 | 13.57410049 | <a href="https://www.genecards.org/cgi-bin/carddisp.pl?gene=PTGS2">https://www.genecards.org/cgi-bin/carddisp.pl?gene=PTGS2</a>     |
| ETFA  | Electron Transfer Flavoprotein Subunit Alpha     | Protein Coding | 52 | GC15M122358 | 13.51145744 | <a href="https://www.genecards.org/cgi-bin/carddisp.pl?gene=PON1">https://www.genecards.org/cgi-bin/carddisp.pl?gene=PON1</a>       |
| HMGCR | 3-Hydroxy-3-Methylglutaryl-CoA Reductase         | Protein Coding | 53 | GC05P075336 | 13.458951   | <a href="https://www.genecards.org/cgi-bin/carddisp.pl?gene=ETFA">https://www.genecards.org/cgi-bin/carddisp.pl?gene=ETFA</a>       |
| FAH   | Fumarylacetoacetate Hydrolase                    | Protein Coding | 53 | GC15P080152 | 13.40405846 | <a href="https://www.genecards.org/cgi-bin/carddisp.pl?gene=HMGCR">https://www.genecards.org/cgi-bin/carddisp.pl?gene=HMGCR</a>     |
| PSAP  | Prosaposin                                       | Protein Coding | 54 | GC10M071816 | 13.35322666 | <a href="https://www.genecards.org/cgi-bin/carddisp.pl?gene=FAH">https://www.genecards.org/cgi-bin/carddisp.pl?gene=FAH</a>         |
| CP    | Ceruloplasmin                                    | Protein Coding | 55 | GC03M149162 | 13.33574104 | <a href="https://www.genecards.org/cgi-bin/carddisp.pl?gene=PSAP">https://www.genecards.org/cgi-bin/carddisp.pl?gene=PSAP</a>       |
| COMT  | Catechol-O-Methyltransferase                     | Protein Coding | 59 | GC22P019941 | 13.30807877 | <a href="https://www.genecards.org/cgi-bin/carddisp.pl?gene=CP">https://www.genecards.org/cgi-bin/carddisp.pl?gene=CP</a>           |
|       |                                                  |                |    |             |             | <a href="https://www.genecards.org/cgi-bin/carddisp.pl?gene=COMT">https://www.genecards.org/cgi-bin/carddisp.pl?gene=COMT</a>       |

|         |                                                          |                |    |             |             |                                                                                                                                     |
|---------|----------------------------------------------------------|----------------|----|-------------|-------------|-------------------------------------------------------------------------------------------------------------------------------------|
| SREBF1  | Sterol Regulatory Element Binding Transcription Factor 1 | Protein Coding | 53 | GC17M017810 | 13.25699425 | <a href="https://www.genecards.org/cgi-bin/carddisp.pl?gene=SREBF1">https://www.genecards.org/cgi-bin/carddisp.pl?gene=SREBF1</a>   |
| NR1H2   | Nuclear Receptor Subfamily 1 Group H Member 2            | Protein Coding | 53 | GC19P050329 | 13.08687782 | <a href="https://www.genecards.org/cgi-bin/carddisp.pl?gene=NR1H2">https://www.genecards.org/cgi-bin/carddisp.pl?gene=NR1H2</a>     |
| ASL     | Argininosuccinate Lyase                                  | Protein Coding | 52 | GC07P066075 | 12.97810268 | <a href="https://www.genecards.org/cgi-bin/carddisp.pl?gene=ASL">https://www.genecards.org/cgi-bin/carddisp.pl?gene=ASL</a>         |
| HADH    | Hydroxyacyl-CoA Dehydrogenase                            | Protein Coding | 54 | GC04P107989 | 12.95173168 | <a href="https://www.genecards.org/cgi-bin/carddisp.pl?gene=HADH">https://www.genecards.org/cgi-bin/carddisp.pl?gene=HADH</a>       |
| SMPD1   | Sphingomyelin Phosphodiesterase 1                        | Protein Coding | 56 | GC11P006390 | 12.94299412 | <a href="https://www.genecards.org/cgi-bin/carddisp.pl?gene=SMPD1">https://www.genecards.org/cgi-bin/carddisp.pl?gene=SMPD1</a>     |
| COX5A   | Cytochrome C Oxidase Subunit 5A                          | Protein Coding | 50 | GC15M074919 | 12.93949127 | <a href="https://www.genecards.org/cgi-bin/carddisp.pl?gene=COX5A">https://www.genecards.org/cgi-bin/carddisp.pl?gene=COX5A</a>     |
| REN     | Renin                                                    | Protein Coding | 55 | GC01M204154 | 12.88049412 | <a href="https://www.genecards.org/cgi-bin/carddisp.pl?gene=REN">https://www.genecards.org/cgi-bin/carddisp.pl?gene=REN</a>         |
| GSS     | Glutathione Synthetase                                   | Protein Coding | 53 | GC20M034928 | 12.87272263 | <a href="https://www.genecards.org/cgi-bin/carddisp.pl?gene=GSS">https://www.genecards.org/cgi-bin/carddisp.pl?gene=GSS</a>         |
| G6PD    | Glucose-6-Phosphate Dehydrogenase                        | Protein Coding | 57 | GC0XM154562 | 12.85865021 | <a href="https://www.genecards.org/cgi-bin/carddisp.pl?gene=G6PD">https://www.genecards.org/cgi-bin/carddisp.pl?gene=G6PD</a>       |
| SLC16A1 | Solute Carrier Family 16 Member 1                        | Protein Coding | 54 | GC01M113013 | 12.82639217 | <a href="https://www.genecards.org/cgi-bin/carddisp.pl?gene=SLC16A1">https://www.genecards.org/cgi-bin/carddisp.pl?gene=SLC16A1</a> |
| CD36    | CD36 Molecule                                            | Protein Coding | 56 | GC07P080369 | 12.77978039 | <a href="https://www.genecards.org/cgi-bin/carddisp.pl?gene=CD36">https://www.genecards.org/cgi-bin/carddisp.pl?gene=CD36</a>       |
| NPC1    | NPC Intracellular Cholesterol Transporter 1              | Protein Coding | 56 | GC18M023506 | 12.75236893 | <a href="https://www.genecards.org/cgi-bin/carddisp.pl?gene=NPC1">https://www.genecards.org/cgi-bin/carddisp.pl?gene=NPC1</a>       |
| DDC     | Dopa Decarboxylase                                       | Protein Coding | 57 | GC07M050458 | 12.74859524 | <a href="https://www.genecards.org/cgi-bin/carddisp.pl?gene=DDC">https://www.genecards.org/cgi-bin/carddisp.pl?gene=DDC</a>         |
| APOA5   | Apolipoprotein A5                                        | Protein Coding | 51 | GC11M116789 | 12.7049284  | <a href="https://www.genecards.org/cgi-bin/carddisp.pl?gene=APOA5">https://www.genecards.org/cgi-bin/carddisp.pl?gene=APOA5</a>     |
| CYP21A2 | Cytochrome P450 Family 21 Subfamily A Member 2           | Protein Coding | 51 | GC06P092176 | 12.66181755 | <a href="https://www.genecards.org/cgi-bin/carddisp.pl?gene=CYP21A2">https://www.genecards.org/cgi-bin/carddisp.pl?gene=CYP21A2</a> |

|         |                                                        |                |    |             |             |                                                                                                                                     |
|---------|--------------------------------------------------------|----------------|----|-------------|-------------|-------------------------------------------------------------------------------------------------------------------------------------|
| CXCL8   | C-X-C Motif Chemokine Ligand 8                         | Protein Coding | 50 | GC04P073740 | 12.65779114 | <a href="https://www.genecards.org/cgi-bin/carddisp.pl?gene=CYP21A2">https://www.genecards.org/cgi-bin/carddisp.pl?gene=CYP21A2</a> |
| UGT1A3  | UDP Glucuronosyltransferase Family 1 Member A3         | Protein Coding | 44 | GC02P233729 | 12.65203857 | <a href="https://www.genecards.org/cgi-bin/carddisp.pl?gene=CXCL8">https://www.genecards.org/cgi-bin/carddisp.pl?gene=CXCL8</a>     |
| EPHX1   | Epoxide Hydrolase 1                                    | Protein Coding | 52 | GC01P225810 | 12.62948704 | <a href="https://www.genecards.org/cgi-bin/carddisp.pl?gene=UGT1A3">https://www.genecards.org/cgi-bin/carddisp.pl?gene=UGT1A3</a>   |
| MLYCD   | Malonyl-CoA Decarboxylase                              | Protein Coding | 48 | GC16P083899 | 12.62700081 | <a href="https://www.genecards.org/cgi-bin/carddisp.pl?gene=EPHX1">https://www.genecards.org/cgi-bin/carddisp.pl?gene=EPHX1</a>     |
| CYP24A1 | Cytochrome P450 Family 24 Subfamily A Member 1         | Protein Coding | 53 | GC20M054153 | 12.61680889 | <a href="https://www.genecards.org/cgi-bin/carddisp.pl?gene=MLYCD">https://www.genecards.org/cgi-bin/carddisp.pl?gene=MLYCD</a>     |
| PDHA1   | Pyruvate Dehydrogenase E1 Subunit Alpha 1              | Protein Coding | 54 | GC0XP019343 | 12.60220623 | <a href="https://www.genecards.org/cgi-bin/carddisp.pl?gene=CYP24A1">https://www.genecards.org/cgi-bin/carddisp.pl?gene=CYP24A1</a> |
| PRKAA2  | Protein Kinase AMP-Activated Catalytic Subunit Alpha 2 | Protein Coding | 57 | GC01P056645 | 12.5937233  | <a href="https://www.genecards.org/cgi-bin/carddisp.pl?gene=PDHA1">https://www.genecards.org/cgi-bin/carddisp.pl?gene=PDHA1</a>     |
| SOD1    | Superoxide Dismutase 1                                 | Protein Coding | 60 | GC21P031659 | 12.58113956 | <a href="https://www.genecards.org/cgi-bin/carddisp.pl?gene=PRKAA2">https://www.genecards.org/cgi-bin/carddisp.pl?gene=PRKAA2</a>   |
| UGT1A10 | UDP Glucuronosyltransferase Family 1 Member A10        | Protein Coding | 48 | GC02P233636 | 12.54686928 | <a href="https://www.genecards.org/cgi-bin/carddisp.pl?gene=SOD1">https://www.genecards.org/cgi-bin/carddisp.pl?gene=SOD1</a>       |
| SLC17A5 | Solute Carrier Family 17 Member 5                      | Protein Coding | 51 | GC06M073593 | 12.54128933 | <a href="https://www.genecards.org/cgi-bin/carddisp.pl?gene=UGT1A10">https://www.genecards.org/cgi-bin/carddisp.pl?gene=UGT1A10</a> |
| NAT2    | N-Acetyltransferase 2                                  | Protein Coding | 47 | GC08P018391 | 12.47551346 | <a href="https://www.genecards.org/cgi-bin/carddisp.pl?gene=SLC17A5">https://www.genecards.org/cgi-bin/carddisp.pl?gene=SLC17A5</a> |
| LIPE    | Lipase E, Hormone Sensitive Type                       | Protein Coding | 54 | GC19M042401 | 12.46535015 | <a href="https://www.genecards.org/cgi-bin/carddisp.pl?gene=NAT2">https://www.genecards.org/cgi-bin/carddisp.pl?gene=NAT2</a>       |
| PLA2G4A | Phospholipase A2 Group IVA                             | Protein Coding | 55 | GC01P186798 | 12.43510914 | <a href="https://www.genecards.org/cgi-bin/carddisp.pl?gene=LIPE">https://www.genecards.org/cgi-bin/carddisp.pl?gene=LIPE</a>       |
| ACACA   | Acetyl-CoA Carboxylase Alpha                           | Protein Coding | 55 | GC17M037084 | 12.39061165 | <a href="https://www.genecards.org/cgi-bin/carddisp.pl?gene=PLA2G4A">https://www.genecards.org/cgi-bin/carddisp.pl?gene=PLA2G4A</a> |
| PRKAA1  | Protein Kinase AMP-Activated Catalytic Subunit Alpha 1 | Protein Coding | 54 | GC05M040759 | 12.38722038 | <a href="https://www.genecards.org/cgi-bin/carddisp.pl?gene=ACACA">https://www.genecards.org/cgi-bin/carddisp.pl?gene=ACACA</a>     |

|          |                                                |                |    |             |             |                                                                                                                                     |
|----------|------------------------------------------------|----------------|----|-------------|-------------|-------------------------------------------------------------------------------------------------------------------------------------|
| ADA      | Adenosine Deaminase                            | Protein Coding | 57 | GC20M044620 | 12.38394356 | <a href="https://www.genecards.org/cgi-bin/carddisp.pl?gene=PRKAA1">https://www.genecards.org/cgi-bin/carddisp.pl?gene=PRKAA1</a>   |
| NR1I2    | Nuclear Receptor Subfamily 1 Group I Member 2  | Protein Coding | 51 | GC03P119780 | 12.3428793  | <a href="https://www.genecards.org/cgi-bin/carddisp.pl?gene=ADA">https://www.genecards.org/cgi-bin/carddisp.pl?gene=ADA</a>         |
| QDPR     | Quinoid Dihydropteridine Reductase             | Protein Coding | 53 | GC04M017460 | 12.31072426 | <a href="https://www.genecards.org/cgi-bin/carddisp.pl?gene=NR1I2">https://www.genecards.org/cgi-bin/carddisp.pl?gene=NR1I2</a>     |
| ALDH6A1  | Aldehyde Dehydrogenase 6 Family Member A1      | Protein Coding | 52 | GC14M074059 | 12.25684834 | <a href="https://www.genecards.org/cgi-bin/carddisp.pl?gene=QDPR">https://www.genecards.org/cgi-bin/carddisp.pl?gene=QDPR</a>       |
| ABCC2    | ATP Binding Cassette Subfamily C Member 2      | Protein Coding | 55 | GC10P099782 | 12.24063396 | <a href="https://www.genecards.org/cgi-bin/carddisp.pl?gene=ALDH6A1">https://www.genecards.org/cgi-bin/carddisp.pl?gene=ALDH6A1</a> |
| F2       | Coagulation Factor II, Thrombin                | Protein Coding | 56 | GC11P046720 | 12.21356201 | <a href="https://www.genecards.org/cgi-bin/carddisp.pl?gene=ABCC2">https://www.genecards.org/cgi-bin/carddisp.pl?gene=ABCC2</a>     |
| DLD      | Dihydrolipoamide Dehydrogenase                 | Protein Coding | 56 | GC07P107890 | 12.20763779 | <a href="https://www.genecards.org/cgi-bin/carddisp.pl?gene=F2">https://www.genecards.org/cgi-bin/carddisp.pl?gene=F2</a>           |
| PYGM     | Glycogen Phosphorylase, Muscle Associated      | Protein Coding | 53 | GC11M064746 | 12.18904305 | <a href="https://www.genecards.org/cgi-bin/carddisp.pl?gene=DLD">https://www.genecards.org/cgi-bin/carddisp.pl?gene=DLD</a>         |
| HBB      | Hemoglobin Subunit Beta                        | Protein Coding | 51 | GC11M006827 | 12.17414379 | <a href="https://www.genecards.org/cgi-bin/carddisp.pl?gene=PYGM">https://www.genecards.org/cgi-bin/carddisp.pl?gene=PYGM</a>       |
| CCL2     | C-C Motif Chemokine Ligand 2                   | Protein Coding | 56 | GC17P034255 | 12.15099144 | <a href="https://www.genecards.org/cgi-bin/carddisp.pl?gene=HBB">https://www.genecards.org/cgi-bin/carddisp.pl?gene=HBB</a>         |
| MCCC2    | Methylcrotonyl-CoA Carboxylase Subunit 2       | Protein Coding | 51 | GC05P073552 | 12.12744713 | <a href="https://www.genecards.org/cgi-bin/carddisp.pl?gene=CCL2">https://www.genecards.org/cgi-bin/carddisp.pl?gene=CCL2</a>       |
| ARSA     | Arylsulfatase A                                | Protein Coding | 53 | GC22M050622 | 12.1175108  | <a href="https://www.genecards.org/cgi-bin/carddisp.pl?gene=MCCC2">https://www.genecards.org/cgi-bin/carddisp.pl?gene=MCCC2</a>     |
| UGT1A7   | UDP Glucuronosyltransferase Family 1 Member A7 | Protein Coding | 47 | GC02P233681 | 12.10301018 | <a href="https://www.genecards.org/cgi-bin/carddisp.pl?gene=ARSA">https://www.genecards.org/cgi-bin/carddisp.pl?gene=ARSA</a>       |
| KL       | Klotho                                         | Protein Coding | 54 | GC13P033016 | 12.0826025  | <a href="https://www.genecards.org/cgi-bin/carddisp.pl?gene=UGT1A7">https://www.genecards.org/cgi-bin/carddisp.pl?gene=UGT1A7</a>   |
| SERPINE1 | Serpin Family E Member 1                       | Protein Coding | 57 | GC07P101127 | 12.04139709 | <a href="https://www.genecards.org/cgi-bin/carddisp.pl?gene=KL">https://www.genecards.org/cgi-bin/carddisp.pl?gene=KL</a>           |

|        |                                                               |                |    |             |             |                                                                                                                                                  |
|--------|---------------------------------------------------------------|----------------|----|-------------|-------------|--------------------------------------------------------------------------------------------------------------------------------------------------|
| DYRK1B | Dual Specificity Tyrosine Phosphorylation Regulated Kinase 1B | Protein Coding | 53 | GC19M039825 | 12.03226757 | ne=SERPINE1<br><a href="https://www.genecards.org/cgi-bin/carddisp.pl?gene=DYRK1B">https://www.genecards.org/cgi-bin/carddisp.pl?gene=DYRK1B</a> |
| SUOX   | Sulfite Oxidase                                               | Protein Coding | 51 | GC12P055997 | 12.02076054 | ne=SUOX<br><a href="https://www.genecards.org/cgi-bin/carddisp.pl?gene=SUOX">https://www.genecards.org/cgi-bin/carddisp.pl?gene=SUOX</a>         |
| NR1H4  | Nuclear Receptor Subfamily 1 Group H Member 4                 | Protein Coding | 55 | GC12P100473 | 12.00567818 | ne=NR1H4<br><a href="https://www.genecards.org/cgi-bin/carddisp.pl?gene=NR1H4">https://www.genecards.org/cgi-bin/carddisp.pl?gene=NR1H4</a>      |
| BCKDK  | Branched Chain Keto Acid Dehydrogenase Kinase                 | Protein Coding | 52 | GC16P042844 | 11.98306084 | ne=BCKDK<br><a href="https://www.genecards.org/cgi-bin/carddisp.pl?gene=BCKDK">https://www.genecards.org/cgi-bin/carddisp.pl?gene=BCKDK</a>      |
| PTEN   | Phosphatase And Tensin Homolog                                | Protein Coding | 59 | GC10P094594 | 11.97610664 | ne=PTEN<br><a href="https://www.genecards.org/cgi-bin/carddisp.pl?gene=PTEN">https://www.genecards.org/cgi-bin/carddisp.pl?gene=PTEN</a>         |
| CS     | Citrate Synthase                                              | Protein Coding | 51 | GC12M056271 | 11.92381477 | ne=CS<br><a href="https://www.genecards.org/cgi-bin/carddisp.pl?gene=CS">https://www.genecards.org/cgi-bin/carddisp.pl?gene=CS</a>               |
| ALDOB  | Aldolase, Fructose-Bisphosphate B                             | Protein Coding | 52 | GC09M101420 | 11.91490173 | ne=ALDOB<br><a href="https://www.genecards.org/cgi-bin/carddisp.pl?gene=ALDOB">https://www.genecards.org/cgi-bin/carddisp.pl?gene=ALDOB</a>      |
| APOA2  | Apolipoprotein A2                                             | Protein Coding | 52 | GC01M161222 | 11.90166092 | ne=APOA2<br><a href="https://www.genecards.org/cgi-bin/carddisp.pl?gene=APOA2">https://www.genecards.org/cgi-bin/carddisp.pl?gene=APOA2</a>      |
| IFNG   | Interferon Gamma                                              | Protein Coding | 57 | GC12M068154 | 11.8699913  | ne=IFNG<br><a href="https://www.genecards.org/cgi-bin/carddisp.pl?gene=IFNG">https://www.genecards.org/cgi-bin/carddisp.pl?gene=IFNG</a>         |
| DPP4   | Dipeptidyl Peptidase 4                                        | Protein Coding | 57 | GC02M161992 | 11.85106945 | ne=DPP4<br><a href="https://www.genecards.org/cgi-bin/carddisp.pl?gene=DPP4">https://www.genecards.org/cgi-bin/carddisp.pl?gene=DPP4</a>         |
| PNP    | Purine Nucleoside Phosphorylase                               | Protein Coding | 56 | GC14P034354 | 11.83236408 | ne=PNP<br><a href="https://www.genecards.org/cgi-bin/carddisp.pl?gene=PNP">https://www.genecards.org/cgi-bin/carddisp.pl?gene=PNP</a>            |
| ALPL   | Alkaline Phosphatase, Biomineralization Associated            | Protein Coding | 58 | GC01P021508 | 11.82943535 | ne=ALPL<br><a href="https://www.genecards.org/cgi-bin/carddisp.pl?gene=ALPL">https://www.genecards.org/cgi-bin/carddisp.pl?gene=ALPL</a>         |
| ALOX5  | Arachidonate 5-Lipoxygenase                                   | Protein Coding | 54 | GC10P045374 | 11.82166386 | ne=ALOX5<br><a href="https://www.genecards.org/cgi-bin/carddisp.pl?gene=ALOX5">https://www.genecards.org/cgi-bin/carddisp.pl?gene=ALOX5</a>      |
| GATM   | Glycine Amidinotransferase                                    | Protein Coding | 52 | GC15M045361 | 11.68083858 | ne=GATM<br><a href="https://www.genecards.org/cgi-bin/carddisp.pl?gene=GATM">https://www.genecards.org/cgi-bin/carddisp.pl?gene=GATM</a>         |
| MCCC1  | Methylcrotonyl-CoA Carboxylase Subunit 1                      | Protein Coding | 50 | GC03M183015 | 11.66801453 | ne=MCCC1<br><a href="https://www.genecards.org/cgi-bin/carddisp.pl?gene=MCCC1">https://www.genecards.org/cgi-bin/carddisp.pl?gene=MCCC1</a>      |

|         |                                                                              |                |    |             |             |                                                                                                                                           |
|---------|------------------------------------------------------------------------------|----------------|----|-------------|-------------|-------------------------------------------------------------------------------------------------------------------------------------------|
| BCHE    | Butyrylcholinesterase                                                        | Protein Coding | 57 | GC03M165772 | 11.63358974 | ne=MCCC1<br><a href="https://www.genecards.org/cgi-bin/carddisp.pl?gene=BCHE">https://www.genecards.org/cgi-bin/carddisp.pl?gene=BCHE</a> |
| PIK3CA  | Phosphatidylinositol-4,5-Bisphosphate 3-Kinase Catalytic Subunit Alpha       | Protein Coding | 59 | GC03P179148 | 11.63045788 | <a href="https://www.genecards.org/cgi-bin/carddisp.pl?gene=PIK3CA">https://www.genecards.org/cgi-bin/carddisp.pl?gene=PIK3CA</a>         |
| MPO     | Myeloperoxidase                                                              | Protein Coding | 59 | GC17M058269 | 11.59176159 | <a href="https://www.genecards.org/cgi-bin/carddisp.pl?gene=MPO">https://www.genecards.org/cgi-bin/carddisp.pl?gene=MPO</a>               |
| ARG1    | Arginase 1                                                                   | Protein Coding | 56 | GC06P131473 | 11.57893658 | <a href="https://www.genecards.org/cgi-bin/carddisp.pl?gene=ARG1">https://www.genecards.org/cgi-bin/carddisp.pl?gene=ARG1</a>             |
| SLC4A1  | Solute Carrier Family 4 Member 1 (Diego Blood Group)                         | Protein Coding | 54 | GC17M051897 | 11.54837894 | <a href="https://www.genecards.org/cgi-bin/carddisp.pl?gene=SLC4A1">https://www.genecards.org/cgi-bin/carddisp.pl?gene=SLC4A1</a>         |
| FABP4   | Fatty Acid Binding Protein 4                                                 | Protein Coding | 50 | GC08M081478 | 11.49729919 | <a href="https://www.genecards.org/cgi-bin/carddisp.pl?gene=FABP4">https://www.genecards.org/cgi-bin/carddisp.pl?gene=FABP4</a>           |
| CAT     | Catalase                                                                     | Protein Coding | 58 | GC11P034460 | 11.48341846 | <a href="https://www.genecards.org/cgi-bin/carddisp.pl?gene=CAT">https://www.genecards.org/cgi-bin/carddisp.pl?gene=CAT</a>               |
| STAR    | Steroidogenic Acute Regulatory Protein                                       | Protein Coding | 51 | GC08M038145 | 11.43203926 | <a href="https://www.genecards.org/cgi-bin/carddisp.pl?gene=STAR">https://www.genecards.org/cgi-bin/carddisp.pl?gene=STAR</a>             |
| ABCC8   | ATP Binding Cassette Subfamily C Member 8                                    | Protein Coding | 53 | GC11M017392 | 11.42554283 | <a href="https://www.genecards.org/cgi-bin/carddisp.pl?gene=ABCC8">https://www.genecards.org/cgi-bin/carddisp.pl?gene=ABCC8</a>           |
| OGDH    | Oxoglutarate Dehydrogenase                                                   | Protein Coding | 53 | GC07P044606 | 11.42041874 | <a href="https://www.genecards.org/cgi-bin/carddisp.pl?gene=OGDH">https://www.genecards.org/cgi-bin/carddisp.pl?gene=OGDH</a>             |
| NQO1    | NAD(P)H Quinone Dehydrogenase 1                                              | Protein Coding | 55 | GC16M069706 | 11.40145969 | <a href="https://www.genecards.org/cgi-bin/carddisp.pl?gene=NQO1">https://www.genecards.org/cgi-bin/carddisp.pl?gene=NQO1</a>             |
| HADHB   | Hydroxyacyl-CoA Dehydrogenase Trifunctional Multienzyme Complex Subunit Beta | Protein Coding | 54 | GC02P026243 | 11.36002731 | <a href="https://www.genecards.org/cgi-bin/carddisp.pl?gene=HADHB">https://www.genecards.org/cgi-bin/carddisp.pl?gene=HADHB</a>           |
| SULT1A1 | Sulfotransferase Family 1A Member 1                                          | Protein Coding | 50 | GC16M038249 | 11.33466053 | <a href="https://www.genecards.org/cgi-bin/carddisp.pl?gene=SULT1A1">https://www.genecards.org/cgi-bin/carddisp.pl?gene=SULT1A1</a>       |
| MVK     | Mevalonate Kinase                                                            | Protein Coding | 54 | GC12P109573 | 11.33141518 | <a href="https://www.genecards.org/cgi-bin/carddisp.pl?gene=MVK">https://www.genecards.org/cgi-bin/carddisp.pl?gene=MVK</a>               |
| AMPD3   | Adenosine Monophosphate Deaminase 3                                          | Protein Coding | 51 | GC11P010309 | 11.29901218 | <a href="https://www.genecards.org/cgi-bin/carddisp.pl?gene=AMPD3">https://www.genecards.org/cgi-bin/carddisp.pl?gene=AMPD3</a>           |

|        |                                                             |                |    |             |             |                                                                                                                                   |
|--------|-------------------------------------------------------------|----------------|----|-------------|-------------|-----------------------------------------------------------------------------------------------------------------------------------|
| FABP2  | Fatty Acid Binding Protein 2                                | Protein Coding | 48 | GC04M119317 | 11.29714584 | <a href="https://www.genecards.org/cgi-bin/carddisp.pl?gene=FABP2">https://www.genecards.org/cgi-bin/carddisp.pl?gene=FABP2</a>   |
| UGT1A  | UDP Glucuronosyltransferase Family 1 Member A Complex Locus | Uncategorized  | 13 | GC02P233592 | 11.28607178 | <a href="https://www.genecards.org/cgi-bin/carddisp.pl?gene=UGT1A">https://www.genecards.org/cgi-bin/carddisp.pl?gene=UGT1A</a>   |
| TF     | Transferrin                                                 | Protein Coding | 57 | GC03P135056 | 11.27254391 | <a href="https://www.genecards.org/cgi-bin/carddisp.pl?gene=TF">https://www.genecards.org/cgi-bin/carddisp.pl?gene=TF</a>         |
| RYR1   | Ryanodine Receptor 1                                        | Protein Coding | 53 | GC19P072806 | 11.22693443 | <a href="https://www.genecards.org/cgi-bin/carddisp.pl?gene=RYR1">https://www.genecards.org/cgi-bin/carddisp.pl?gene=RYR1</a>     |
| SDHB   | Succinate Dehydrogenase Complex Iron Sulfur Subunit B       | Protein Coding | 54 | GC01M018297 | 11.20557117 | <a href="https://www.genecards.org/cgi-bin/carddisp.pl?gene=SDHB">https://www.genecards.org/cgi-bin/carddisp.pl?gene=SDHB</a>     |
| CYP3A7 | Cytochrome P450 Family 3 Subfamily A Member 7               | Protein Coding | 47 | GC07M099705 | 11.19146252 | <a href="https://www.genecards.org/cgi-bin/carddisp.pl?gene=CYP3A7">https://www.genecards.org/cgi-bin/carddisp.pl?gene=CYP3A7</a> |
| ACSS2  | Acyl-CoA Synthetase Short Chain Family Member 2             | Protein Coding | 52 | GC20P034873 | 11.14794254 | <a href="https://www.genecards.org/cgi-bin/carddisp.pl?gene=ACSS2">https://www.genecards.org/cgi-bin/carddisp.pl?gene=ACSS2</a>   |
| ACAT1  | Acetyl-CoA Acetyltransferase 1                              | Protein Coding | 56 | GC11P108121 | 11.1475544  | <a href="https://www.genecards.org/cgi-bin/carddisp.pl?gene=ACAT1">https://www.genecards.org/cgi-bin/carddisp.pl?gene=ACAT1</a>   |
| CTH    | Cystathionine Gamma-Lyase                                   | Protein Coding | 56 | GC01P070411 | 11.13909245 | <a href="https://www.genecards.org/cgi-bin/carddisp.pl?gene=CTH">https://www.genecards.org/cgi-bin/carddisp.pl?gene=CTH</a>       |
| AR     | Androgen Receptor                                           | Protein Coding | 59 | GC0XP067544 | 11.10406113 | <a href="https://www.genecards.org/cgi-bin/carddisp.pl?gene=AR">https://www.genecards.org/cgi-bin/carddisp.pl?gene=AR</a>         |
| GNAS   | GNAS Complex Locus                                          | Protein Coding | 56 | GC20P058839 | 11.09564114 | <a href="https://www.genecards.org/cgi-bin/carddisp.pl?gene=GNAS">https://www.genecards.org/cgi-bin/carddisp.pl?gene=GNAS</a>     |
| GCSH   | Glycine Cleavage System Protein H                           | Protein Coding | 49 | GC16M081081 | 11.08065605 | <a href="https://www.genecards.org/cgi-bin/carddisp.pl?gene=GCSH">https://www.genecards.org/cgi-bin/carddisp.pl?gene=GCSH</a>     |
| PNPLA3 | Patatin Like Phospholipase Domain Containing 3              | Protein Coding | 48 | GC22P043923 | 11.0245285  | <a href="https://www.genecards.org/cgi-bin/carddisp.pl?gene=PNPLA3">https://www.genecards.org/cgi-bin/carddisp.pl?gene=PNPLA3</a> |
| FGF21  | Fibroblast Growth Factor 21                                 | Protein Coding | 46 | GC19P073194 | 10.99773979 | <a href="https://www.genecards.org/cgi-bin/carddisp.pl?gene=FGF21">https://www.genecards.org/cgi-bin/carddisp.pl?gene=FGF21</a>   |
| CPOX   | Coproporphyrinogen Oxidase                                  | Protein Coding | 51 | GC03M098576 | 10.99168968 | <a href="https://www.genecards.org/cgi-bin/carddisp.pl?gene=CPOX">https://www.genecards.org/cgi-bin/carddisp.pl?gene=CPOX</a>     |

|         |                                                                |                |    |             |             |                                                                                                                                     |
|---------|----------------------------------------------------------------|----------------|----|-------------|-------------|-------------------------------------------------------------------------------------------------------------------------------------|
| CNR1    | Cannabinoid Receptor 1                                         | Protein Coding | 53 | GC06M088139 | 10.95663166 | <a href="https://www.genecards.org/cgi-bin/carddisp.pl?gene=CNR1">https://www.genecards.org/cgi-bin/carddisp.pl?gene=CNR1</a>       |
| TAT     | Tyrosine Aminotransferase                                      | Protein Coding | 52 | GC16M071565 | 10.91602612 | <a href="https://www.genecards.org/cgi-bin/carddisp.pl?gene=TAT">https://www.genecards.org/cgi-bin/carddisp.pl?gene=TAT</a>         |
| GRIA2   | Glutamate Ionotropic Receptor AMPA Type Subunit 2              | Protein Coding | 58 | GC04P157204 | 10.91508484 | <a href="https://www.genecards.org/cgi-bin/carddisp.pl?gene=GRIA2">https://www.genecards.org/cgi-bin/carddisp.pl?gene=GRIA2</a>     |
| EHHADH  | Enoyl-CoA Hydratase And 3-Hydroxyacyl CoA Dehydrogenase        | Protein Coding | 50 | GC03M185190 | 10.90606213 | <a href="https://www.genecards.org/cgi-bin/carddisp.pl?gene=EHHADH">https://www.genecards.org/cgi-bin/carddisp.pl?gene=EHHADH</a>   |
| CFTR    | CF Transmembrane Conductance Regulator                         | Protein Coding | 59 | GC07P117287 | 10.90104771 | <a href="https://www.genecards.org/cgi-bin/carddisp.pl?gene=CFTR">https://www.genecards.org/cgi-bin/carddisp.pl?gene=CFTR</a>       |
| UPB1    | Beta-Ureidopropionase 1                                        | Protein Coding | 51 | GC22P024494 | 10.89578056 | <a href="https://www.genecards.org/cgi-bin/carddisp.pl?gene=UPB1">https://www.genecards.org/cgi-bin/carddisp.pl?gene=UPB1</a>       |
| PTGS1   | Prostaglandin-Endoperoxide Synthase 1                          | Protein Coding | 53 | GC09P122370 | 10.85939598 | <a href="https://www.genecards.org/cgi-bin/carddisp.pl?gene=PTGS1">https://www.genecards.org/cgi-bin/carddisp.pl?gene=PTGS1</a>     |
| RBP4    | Retinol Binding Protein 4                                      | Protein Coding | 52 | GC10M093591 | 10.77317238 | <a href="https://www.genecards.org/cgi-bin/carddisp.pl?gene=RBP4">https://www.genecards.org/cgi-bin/carddisp.pl?gene=RBP4</a>       |
| HMOX1   | Heme Oxygenase 1                                               | Protein Coding | 59 | GC22P035380 | 10.77141571 | <a href="https://www.genecards.org/cgi-bin/carddisp.pl?gene=HMOX1">https://www.genecards.org/cgi-bin/carddisp.pl?gene=HMOX1</a>     |
| POR     | Cytochrome P450 Oxidoreductase                                 | Protein Coding | 56 | GC07P075899 | 10.76194668 | <a href="https://www.genecards.org/cgi-bin/carddisp.pl?gene=POR">https://www.genecards.org/cgi-bin/carddisp.pl?gene=POR</a>         |
| MB      | Myoglobin                                                      | Protein Coding | 50 | GC22M035606 | 10.72063637 | <a href="https://www.genecards.org/cgi-bin/carddisp.pl?gene=MB">https://www.genecards.org/cgi-bin/carddisp.pl?gene=MB</a>           |
| SDHA    | Succinate Dehydrogenase Complex Flavoprotein Subunit A         | Protein Coding | 54 | GC05P000220 | 10.72057343 | <a href="https://www.genecards.org/cgi-bin/carddisp.pl?gene=SDHA">https://www.genecards.org/cgi-bin/carddisp.pl?gene=SDHA</a>       |
| ABCG2   | ATP Binding Cassette Subfamily G Member 2 (Junior Blood Group) | Protein Coding | 56 | GC04M088090 | 10.62441158 | <a href="https://www.genecards.org/cgi-bin/carddisp.pl?gene=ABCG2">https://www.genecards.org/cgi-bin/carddisp.pl?gene=ABCG2</a>     |
| DGAT1   | Diacylglycerol O-Acyltransferase 1                             | Protein Coding | 55 | GC08M144325 | 10.61318207 | <a href="https://www.genecards.org/cgi-bin/carddisp.pl?gene=DGAT1">https://www.genecards.org/cgi-bin/carddisp.pl?gene=DGAT1</a>     |
| CYP11B2 | Cytochrome P450 Family 11 Subfamily B Member 2                 | Protein Coding | 53 | GC08M142910 | 10.61117077 | <a href="https://www.genecards.org/cgi-bin/carddisp.pl?gene=CYP11B2">https://www.genecards.org/cgi-bin/carddisp.pl?gene=CYP11B2</a> |

|          |                                                    |                |    |             |             |                                                                                                                                       |
|----------|----------------------------------------------------|----------------|----|-------------|-------------|---------------------------------------------------------------------------------------------------------------------------------------|
| UGT2B7   | UDP Glucuronosyltransferase Family 2 Member B7     | Protein Coding | 50 | GC04P069051 | 10.59724236 | <a href="https://www.genecards.org/cgi-bin/carddisp.pl?gene=CYP11B2">https://www.genecards.org/cgi-bin/carddisp.pl?gene=CYP11B2</a>   |
| CYP27A1  | Cytochrome P450 Family 27 Subfamily A Member 1     | Protein Coding | 53 | GC02P218781 | 10.5703907  | <a href="https://www.genecards.org/cgi-bin/carddisp.pl?gene=UGT2B7">https://www.genecards.org/cgi-bin/carddisp.pl?gene=UGT2B7</a>     |
| SLC25A20 | Solute Carrier Family 25 Member 20                 | Protein Coding | 51 | GC03M048864 | 10.55376339 | <a href="https://www.genecards.org/cgi-bin/carddisp.pl?gene=CYP27A1">https://www.genecards.org/cgi-bin/carddisp.pl?gene=CYP27A1</a>   |
| PRL      | Prolactin                                          | Protein Coding | 50 | GC06M022287 | 10.54038048 | <a href="https://www.genecards.org/cgi-bin/carddisp.pl?gene=SLC25A20">https://www.genecards.org/cgi-bin/carddisp.pl?gene=SLC25A20</a> |
| UGT1A4   | UDP Glucuronosyltransferase Family 1 Member A4     | Protein Coding | 49 | GC02P233718 | 10.53925133 | <a href="https://www.genecards.org/cgi-bin/carddisp.pl?gene=PRL">https://www.genecards.org/cgi-bin/carddisp.pl?gene=PRL</a>           |
| VCAM1    | Vascular Cell Adhesion Molecule 1                  | Protein Coding | 52 | GC01P100719 | 10.49340725 | <a href="https://www.genecards.org/cgi-bin/carddisp.pl?gene=UGT1A4">https://www.genecards.org/cgi-bin/carddisp.pl?gene=UGT1A4</a>     |
| KYNU     | Kynureninase                                       | Protein Coding | 55 | GC02P142877 | 10.47294903 | <a href="https://www.genecards.org/cgi-bin/carddisp.pl?gene=VCAM1">https://www.genecards.org/cgi-bin/carddisp.pl?gene=VCAM1</a>       |
| SRD5A2   | Steroid 5 Alpha-Reductase 2                        | Protein Coding | 49 | GC02M031522 | 10.46125317 | <a href="https://www.genecards.org/cgi-bin/carddisp.pl?gene=KYNU">https://www.genecards.org/cgi-bin/carddisp.pl?gene=KYNU</a>         |
| TYMP     | Thymidine Phosphorylase                            | Protein Coding | 54 | GC22M050525 | 10.40325737 | <a href="https://www.genecards.org/cgi-bin/carddisp.pl?gene=SRD5A2">https://www.genecards.org/cgi-bin/carddisp.pl?gene=SRD5A2</a>     |
| MC4R     | Melanocortin 4 Receptor                            | Protein Coding | 53 | GC18M060371 | 10.38755989 | <a href="https://www.genecards.org/cgi-bin/carddisp.pl?gene=TYMP">https://www.genecards.org/cgi-bin/carddisp.pl?gene=TYMP</a>         |
| NDUFS4   | NADH:Ubiquinone Oxidoreductase Subunit S4          | Protein Coding | 50 | GC05P053560 | 10.37858486 | <a href="https://www.genecards.org/cgi-bin/carddisp.pl?gene=MC4R">https://www.genecards.org/cgi-bin/carddisp.pl?gene=MC4R</a>         |
| PCK2     | Phosphoenolpyruvate Carboxykinase 2, Mitochondrial | Protein Coding | 53 | GC14P024094 | 10.35907841 | <a href="https://www.genecards.org/cgi-bin/carddisp.pl?gene=NDUFS4">https://www.genecards.org/cgi-bin/carddisp.pl?gene=NDUFS4</a>     |
| SCD      | Stearoyl-CoA Desaturase                            | Protein Coding | 57 | GC10P100347 | 10.35372066 | <a href="https://www.genecards.org/cgi-bin/carddisp.pl?gene=PCK2">https://www.genecards.org/cgi-bin/carddisp.pl?gene=PCK2</a>         |
| GSR      | Glutathione-Disulfide Reductase                    | Protein Coding | 56 | GC08M030678 | 10.34006882 | <a href="https://www.genecards.org/cgi-bin/carddisp.pl?gene=SCD">https://www.genecards.org/cgi-bin/carddisp.pl?gene=SCD</a>           |
| GRIA1    | Glutamate Ionotropic Receptor AMPA Type Subunit 1  | Protein Coding | 56 | GC05P153467 | 10.3355341  | <a href="https://www.genecards.org/cgi-bin/carddisp.pl?gene=GSR">https://www.genecards.org/cgi-bin/carddisp.pl?gene=GSR</a>           |
|          |                                                    |                |    |             |             | <a href="https://www.genecards.org/cgi-bin/carddisp.pl?gene=GRIA1">https://www.genecards.org/cgi-bin/carddisp.pl?gene=GRIA1</a>       |

|         |                                                             |                |    |             |             |                                                                                                                                     |
|---------|-------------------------------------------------------------|----------------|----|-------------|-------------|-------------------------------------------------------------------------------------------------------------------------------------|
| HMGCS2  | 3-Hydroxy-3-Methylglutaryl-CoA Synthase 2                   | Protein Coding | 53 | GC01M119747 | 10.30286884 | <a href="https://www.genecards.org/cgi-bin/carddisp.pl?gene=HMGCS2">https://www.genecards.org/cgi-bin/carddisp.pl?gene=HMGCS2</a>   |
| FFAR2   | Free Fatty Acid Receptor 2                                  | Protein Coding | 48 | GC19P072731 | 10.30257607 | <a href="https://www.genecards.org/cgi-bin/carddisp.pl?gene=FFAR2">https://www.genecards.org/cgi-bin/carddisp.pl?gene=FFAR2</a>     |
| BLOC1S1 | Biogenesis Of Lysosomal Organelles Complex 1 Subunit 1      | Protein Coding | 42 | GC12P055950 | 10.30231476 | <a href="https://www.genecards.org/cgi-bin/carddisp.pl?gene=BLOC1S1">https://www.genecards.org/cgi-bin/carddisp.pl?gene=BLOC1S1</a> |
| GH1     | Growth Hormone 1                                            | Protein Coding | 50 | GC17M063917 | 10.25849533 | <a href="https://www.genecards.org/cgi-bin/carddisp.pl?gene=GH1">https://www.genecards.org/cgi-bin/carddisp.pl?gene=GH1</a>         |
| KCNJ1   | Potassium Inwardly Rectifying Channel Subfamily J Member 1  | Protein Coding | 54 | GC11M128741 | 10.25777531 | <a href="https://www.genecards.org/cgi-bin/carddisp.pl?gene=KCNJ1">https://www.genecards.org/cgi-bin/carddisp.pl?gene=KCNJ1</a>     |
| APP     | Amyloid Beta Precursor Protein                              | Protein Coding | 58 | GC21M025880 | 10.25391865 | <a href="https://www.genecards.org/cgi-bin/carddisp.pl?gene=APP">https://www.genecards.org/cgi-bin/carddisp.pl?gene=APP</a>         |
| EPHX2   | Epoxide Hydrolase 2                                         | Protein Coding | 53 | GC08P027490 | 10.23595047 | <a href="https://www.genecards.org/cgi-bin/carddisp.pl?gene=EPHX2">https://www.genecards.org/cgi-bin/carddisp.pl?gene=EPHX2</a>     |
| PTPN1   | Protein Tyrosine Phosphatase Non-Receptor Type 1            | Protein Coding | 57 | GC20P050510 | 10.23029804 | <a href="https://www.genecards.org/cgi-bin/carddisp.pl?gene=PTPN1">https://www.genecards.org/cgi-bin/carddisp.pl?gene=PTPN1</a>     |
| GOT2    | Glutamic-Oxaloacetic Transaminase 2                         | Protein Coding | 53 | GC16M058707 | 10.2194376  | <a href="https://www.genecards.org/cgi-bin/carddisp.pl?gene=GOT2">https://www.genecards.org/cgi-bin/carddisp.pl?gene=GOT2</a>       |
| KCNJ11  | Potassium Inwardly Rectifying Channel Subfamily J Member 11 | Protein Coding | 53 | GC11M017663 | 10.20500565 | <a href="https://www.genecards.org/cgi-bin/carddisp.pl?gene=KCNJ11">https://www.genecards.org/cgi-bin/carddisp.pl?gene=KCNJ11</a>   |
| NR113   | Nuclear Receptor Subfamily 1 Group 1 Member 3               | Protein Coding | 51 | GC01M161229 | 10.19310284 | <a href="https://www.genecards.org/cgi-bin/carddisp.pl?gene=NR113">https://www.genecards.org/cgi-bin/carddisp.pl?gene=NR113</a>     |
| CYP11B1 | Cytochrome P450 Family 11 Subfamily B Member 1              | Protein Coding | 52 | GC08M142872 | 10.17906284 | <a href="https://www.genecards.org/cgi-bin/carddisp.pl?gene=CYP11B1">https://www.genecards.org/cgi-bin/carddisp.pl?gene=CYP11B1</a> |
| HK2     | Hexokinase 2                                                | Protein Coding | 52 | GC02P074833 | 10.16204357 | <a href="https://www.genecards.org/cgi-bin/carddisp.pl?gene=HK2">https://www.genecards.org/cgi-bin/carddisp.pl?gene=HK2</a>         |
| ATP7A   | ATPase Copper Transporting Alpha                            | Protein Coding | 52 | GC0XP078031 | 10.16186047 | <a href="https://www.genecards.org/cgi-bin/carddisp.pl?gene=ATP7A">https://www.genecards.org/cgi-bin/carddisp.pl?gene=ATP7A</a>     |
| MTOR    | Mechanistic Target Of Rapamycin Kinase                      | Protein Coding | 62 | GC01M011106 | 10.12988853 | <a href="https://www.genecards.org/cgi-bin/carddisp.pl?gene=MTOR">https://www.genecards.org/cgi-bin/carddisp.pl?gene=MTOR</a>       |

|          |                                               |                |    |             |             |                                                                                                                                       |
|----------|-----------------------------------------------|----------------|----|-------------|-------------|---------------------------------------------------------------------------------------------------------------------------------------|
| IGFBP3   | Insulin Like Growth Factor Binding Protein 3  | Protein Coding | 54 | GC07M045912 | 10.12064362 | <a href="https://www.genecards.org/cgi-bin/carddisp.pl?gene=IGFBP3">https://www.genecards.org/cgi-bin/carddisp.pl?gene=IGFBP3</a>     |
| TCN2     | Transcobalamin 2                              | Protein Coding | 50 | GC22P044849 | 10.1113596  | <a href="https://www.genecards.org/cgi-bin/carddisp.pl?gene=TCN2">https://www.genecards.org/cgi-bin/carddisp.pl?gene=TCN2</a>         |
| BDNF     | Brain Derived Neurotrophic Factor             | Protein Coding | 56 | GC11M027654 | 10.10180569 | <a href="https://www.genecards.org/cgi-bin/carddisp.pl?gene=BDNF">https://www.genecards.org/cgi-bin/carddisp.pl?gene=BDNF</a>         |
| AKR1A1   | Aldo-Keto Reductase Family 1 Member A1        | Protein Coding | 51 | GC01P045550 | 10.08849812 | <a href="https://www.genecards.org/cgi-bin/carddisp.pl?gene=AKR1A1">https://www.genecards.org/cgi-bin/carddisp.pl?gene=AKR1A1</a>     |
| UCP1     | Uncoupling Protein 1                          | Protein Coding | 50 | GC04M140559 | 10.07172298 | <a href="https://www.genecards.org/cgi-bin/carddisp.pl?gene=UCP1">https://www.genecards.org/cgi-bin/carddisp.pl?gene=UCP1</a>         |
| SERPINA1 | Serpin Family A Member 1                      | Protein Coding | 56 | GC14M094376 | 10.03485966 | <a href="https://www.genecards.org/cgi-bin/carddisp.pl?gene=SERPINA1">https://www.genecards.org/cgi-bin/carddisp.pl?gene=SERPINA1</a> |
| TTR      | Transthyretin                                 | Protein Coding | 55 | GC18P031557 | 10.01377964 | <a href="https://www.genecards.org/cgi-bin/carddisp.pl?gene=TTR">https://www.genecards.org/cgi-bin/carddisp.pl?gene=TTR</a>           |
| CYP4F2   | Cytochrome P450 Family 4 Subfamily F Member 2 | Protein Coding | 50 | GC19M015878 | 9.978006363 | <a href="https://www.genecards.org/cgi-bin/carddisp.pl?gene=CYP4F2">https://www.genecards.org/cgi-bin/carddisp.pl?gene=CYP4F2</a>     |
| ALDH9A1  | Aldehyde Dehydrogenase 9 Family Member A1     | Protein Coding | 49 | GC01M165681 | 9.949209213 | <a href="https://www.genecards.org/cgi-bin/carddisp.pl?gene=ALDH9A1">https://www.genecards.org/cgi-bin/carddisp.pl?gene=ALDH9A1</a>   |
| AKT2     | AKT Serine/Threonine Kinase 2                 | Protein Coding | 61 | GC19M040230 | 9.924123764 | <a href="https://www.genecards.org/cgi-bin/carddisp.pl?gene=AKT2">https://www.genecards.org/cgi-bin/carddisp.pl?gene=AKT2</a>         |
| HNF1A    | HNF1 Homeobox A                               | Protein Coding | 53 | GC12P120978 | 9.914362907 | <a href="https://www.genecards.org/cgi-bin/carddisp.pl?gene=HNF1A">https://www.genecards.org/cgi-bin/carddisp.pl?gene=HNF1A</a>       |
| PPIG     | Peptidylprolyl Isomerase G                    | Protein Coding | 48 | GC02P169584 | 9.875458717 | <a href="https://www.genecards.org/cgi-bin/carddisp.pl?gene=PPIG">https://www.genecards.org/cgi-bin/carddisp.pl?gene=PPIG</a>         |
| LIPA     | Lipase A, Lysosomal Acid Type                 | Protein Coding | 55 | GC10M089213 | 9.852193832 | <a href="https://www.genecards.org/cgi-bin/carddisp.pl?gene=LIPA">https://www.genecards.org/cgi-bin/carddisp.pl?gene=LIPA</a>         |
| SCNN1G   | Sodium Channel Epithelial 1 Subunit Gamma     | Protein Coding | 53 | GC16P023182 | 9.823068619 | <a href="https://www.genecards.org/cgi-bin/carddisp.pl?gene=SCNN1G">https://www.genecards.org/cgi-bin/carddisp.pl?gene=SCNN1G</a>     |
| UROCI    | Urocanate Hydratase 1                         | Protein Coding | 46 | GC03M126481 | 9.821082115 | <a href="https://www.genecards.org/cgi-bin/carddisp.pl?gene=UROCI">https://www.genecards.org/cgi-bin/carddisp.pl?gene=UROCI</a>       |

|          |                                                                       |                |    |             |             |                                                                                                                                       |
|----------|-----------------------------------------------------------------------|----------------|----|-------------|-------------|---------------------------------------------------------------------------------------------------------------------------------------|
| PCK1     | Phosphoenolpyruvate Carboxykinase 1                                   | Protein Coding | 54 | GC20P057561 | 9.816595078 | <a href="https://www.genecards.org/cgi-bin/carddisp.pl?gene=UROC1">https://www.genecards.org/cgi-bin/carddisp.pl?gene=UROC1</a>       |
| NPY      | Neuropeptide Y                                                        | Protein Coding | 51 | GC07P024290 | 9.814024925 | <a href="https://www.genecards.org/cgi-bin/carddisp.pl?gene=PCK1">https://www.genecards.org/cgi-bin/carddisp.pl?gene=PCK1</a>         |
| SLC25A15 | Solute Carrier Family 25 Member 15                                    | Protein Coding | 50 | GC13P040789 | 9.767385483 | <a href="https://www.genecards.org/cgi-bin/carddisp.pl?gene=NPY">https://www.genecards.org/cgi-bin/carddisp.pl?gene=NPY</a>           |
| MT-ND6   | Mitochondrially Encoded NADH:Ubiquinone Oxidoreductase Core Subunit 6 | Protein Coding | 38 | GCMTM014151 | 9.757986069 | <a href="https://www.genecards.org/cgi-bin/carddisp.pl?gene=SLC25A15">https://www.genecards.org/cgi-bin/carddisp.pl?gene=SLC25A15</a> |
| HGD      | Homogentisate 1,2-Dioxygenase                                         | Protein Coding | 50 | GC03M120628 | 9.720542908 | <a href="https://www.genecards.org/cgi-bin/carddisp.pl?gene=MT-ND6">https://www.genecards.org/cgi-bin/carddisp.pl?gene=MT-ND6</a>     |
| SERPINA3 | Serpin Family A Member 3                                              | Protein Coding | 50 | GC14P094612 | 9.719280243 | <a href="https://www.genecards.org/cgi-bin/carddisp.pl?gene=HGD">https://www.genecards.org/cgi-bin/carddisp.pl?gene=HGD</a>           |
| ASAH1    | N-Acylsphingosine Amidohydrolase 1                                    | Protein Coding | 56 | GC08M018055 | 9.712446213 | <a href="https://www.genecards.org/cgi-bin/carddisp.pl?gene=SERPINA3">https://www.genecards.org/cgi-bin/carddisp.pl?gene=SERPINA3</a> |
| PDP1     | Pyruvate Dehydrogenase Phosphatase Catalytic Subunit 1                | Protein Coding | 54 | GC08P093857 | 9.703587532 | <a href="https://www.genecards.org/cgi-bin/carddisp.pl?gene=ASAH1">https://www.genecards.org/cgi-bin/carddisp.pl?gene=ASAH1</a>       |
| ABCC1    | ATP Binding Cassette Subfamily C Member 1                             | Protein Coding | 56 | GC16P015949 | 9.692297935 | <a href="https://www.genecards.org/cgi-bin/carddisp.pl?gene=PDP1">https://www.genecards.org/cgi-bin/carddisp.pl?gene=PDP1</a>         |
| DPYS     | Dihydropyrimidinase                                                   | Protein Coding | 52 | GC08M104331 | 9.645685196 | <a href="https://www.genecards.org/cgi-bin/carddisp.pl?gene=ABCC1">https://www.genecards.org/cgi-bin/carddisp.pl?gene=ABCC1</a>       |
| SLC5A6   | Solute Carrier Family 5 Member 6                                      | Protein Coding | 51 | GC02M027201 | 9.638032913 | <a href="https://www.genecards.org/cgi-bin/carddisp.pl?gene=DPYS">https://www.genecards.org/cgi-bin/carddisp.pl?gene=DPYS</a>         |
| TPI1     | Triosephosphate Isomerase 1                                           | Protein Coding | 54 | GC12P006867 | 9.596486092 | <a href="https://www.genecards.org/cgi-bin/carddisp.pl?gene=SLC5A6">https://www.genecards.org/cgi-bin/carddisp.pl?gene=SLC5A6</a>     |
| PRKAB1   | Protein Kinase AMP-Activated Non-Catalytic Subunit Beta 1             | Protein Coding | 53 | GC12P119632 | 9.594614029 | <a href="https://www.genecards.org/cgi-bin/carddisp.pl?gene=TPI1">https://www.genecards.org/cgi-bin/carddisp.pl?gene=TPI1</a>         |
| ABCB11   | ATP Binding Cassette Subfamily B Member 11                            | Protein Coding | 53 | GC02M168922 | 9.566059113 | <a href="https://www.genecards.org/cgi-bin/carddisp.pl?gene=PRKAB1">https://www.genecards.org/cgi-bin/carddisp.pl?gene=PRKAB1</a>     |
| TNFSF11  | TNF Superfamily Member 11                                             | Protein Coding | 56 | GC13P042562 | 9.559355736 | <a href="https://www.genecards.org/cgi-bin/carddisp.pl?gene=ABCB11">https://www.genecards.org/cgi-bin/carddisp.pl?gene=ABCB11</a>     |
|          |                                                                       |                |    |             |             | <a href="https://www.genecards.org/cgi-bin/carddisp.pl?gene=TNFSF11">https://www.genecards.org/cgi-bin/carddisp.pl?gene=TNFSF11</a>   |

|         |                                                          |                |    |             |             |                                                                                                                                     |
|---------|----------------------------------------------------------|----------------|----|-------------|-------------|-------------------------------------------------------------------------------------------------------------------------------------|
| PHKA2   | Phosphorylase Kinase Regulatory Subunit Alpha 2          | Protein Coding | 51 | GC0XM018892 | 9.55429554  | <a href="https://www.genecards.org/cgi-bin/carddisp.pl?gene=PHKA2">https://www.genecards.org/cgi-bin/carddisp.pl?gene=PHKA2</a>     |
| EPO     | Erythropoietin                                           | Protein Coding | 49 | GC07P100720 | 9.553358078 | <a href="https://www.genecards.org/cgi-bin/carddisp.pl?gene=EPO">https://www.genecards.org/cgi-bin/carddisp.pl?gene=EPO</a>         |
| EPRS1   | Glutamyl-Prolyl-TRNA Synthetase 1                        | Protein Coding | 50 | GC01M219969 | 9.552751541 | <a href="https://www.genecards.org/cgi-bin/carddisp.pl?gene=EPRS1">https://www.genecards.org/cgi-bin/carddisp.pl?gene=EPRS1</a>     |
| MAOA    | Monoamine Oxidase A                                      | Protein Coding | 55 | GC0XP043654 | 9.547767639 | <a href="https://www.genecards.org/cgi-bin/carddisp.pl?gene=MAOA">https://www.genecards.org/cgi-bin/carddisp.pl?gene=MAOA</a>       |
| ACAT2   | Acetyl-CoA Acetyltransferase 2                           | Protein Coding | 51 | GC06P160802 | 9.544605255 | <a href="https://www.genecards.org/cgi-bin/carddisp.pl?gene=ACAT2">https://www.genecards.org/cgi-bin/carddisp.pl?gene=ACAT2</a>     |
| SCARB1  | Scavenger Receptor Class B Member 1                      | Protein Coding | 55 | GC12M124776 | 9.489313126 | <a href="https://www.genecards.org/cgi-bin/carddisp.pl?gene=SCARB1">https://www.genecards.org/cgi-bin/carddisp.pl?gene=SCARB1</a>   |
| MT-CYB  | Mitochondrially Encoded Cytochrome B                     | Protein Coding | 38 | GCMTP014749 | 9.488700867 | <a href="https://www.genecards.org/cgi-bin/carddisp.pl?gene=MT-CYB">https://www.genecards.org/cgi-bin/carddisp.pl?gene=MT-CYB</a>   |
| BCL2    | BCL2 Apoptosis Regulator                                 | Protein Coding | 57 | GC18M063123 | 9.478082657 | <a href="https://www.genecards.org/cgi-bin/carddisp.pl?gene=BCL2">https://www.genecards.org/cgi-bin/carddisp.pl?gene=BCL2</a>       |
| BMP6    | Bone Morphogenetic Protein 6                             | Protein Coding | 50 | GC06P007726 | 9.47426033  | <a href="https://www.genecards.org/cgi-bin/carddisp.pl?gene=BMP6">https://www.genecards.org/cgi-bin/carddisp.pl?gene=BMP6</a>       |
| ANGPTL4 | Angiopoietin Like 4                                      | Protein Coding | 52 | GC19P008363 | 9.469734192 | <a href="https://www.genecards.org/cgi-bin/carddisp.pl?gene=ANGPTL4">https://www.genecards.org/cgi-bin/carddisp.pl?gene=ANGPTL4</a> |
| MAPK1   | Mitogen-Activated Protein Kinase 1                       | Protein Coding | 59 | GC22M021759 | 9.460432053 | <a href="https://www.genecards.org/cgi-bin/carddisp.pl?gene=MAPK1">https://www.genecards.org/cgi-bin/carddisp.pl?gene=MAPK1</a>     |
| SREBF2  | Sterol Regulatory Element Binding Transcription Factor 2 | Protein Coding | 50 | GC22P041833 | 9.449868202 | <a href="https://www.genecards.org/cgi-bin/carddisp.pl?gene=SREBF2">https://www.genecards.org/cgi-bin/carddisp.pl?gene=SREBF2</a>   |
| SLC6A8  | Solute Carrier Family 6 Member 8                         | Protein Coding | 53 | GC0XP153688 | 9.426587105 | <a href="https://www.genecards.org/cgi-bin/carddisp.pl?gene=SLC6A8">https://www.genecards.org/cgi-bin/carddisp.pl?gene=SLC6A8</a>   |
| PGR     | Progesterone Receptor                                    | Protein Coding | 56 | GC11M102130 | 9.400068283 | <a href="https://www.genecards.org/cgi-bin/carddisp.pl?gene=PGR">https://www.genecards.org/cgi-bin/carddisp.pl?gene=PGR</a>         |
| PKM     | Pyruvate Kinase M1/2                                     | Protein Coding | 56 | GC15M072199 | 9.394825935 | <a href="https://www.genecards.org/cgi-bin/carddisp.pl?gene=PKM">https://www.genecards.org/cgi-bin/carddisp.pl?gene=PKM</a>         |

|         |                                                                |                |    |             |             |                                                                                                                                     |
|---------|----------------------------------------------------------------|----------------|----|-------------|-------------|-------------------------------------------------------------------------------------------------------------------------------------|
| PRPS1   | Phosphoribosyl Pyrophosphate Synthetase 1                      | Protein Coding | 54 | GC0XP107628 | 9.386370659 | <a href="https://www.genecards.org/cgi-bin/carddisp.pl?gene=PRPS1">https://www.genecards.org/cgi-bin/carddisp.pl?gene=PRPS1</a>     |
| AHR     | Aryl Hydrocarbon Receptor                                      | Protein Coding | 54 | GC07P016916 | 9.34418869  | <a href="https://www.genecards.org/cgi-bin/carddisp.pl?gene=AHR">https://www.genecards.org/cgi-bin/carddisp.pl?gene=AHR</a>         |
| ACSS1   | Acyl-CoA Synthetase Short Chain Family Member 1                | Protein Coding | 47 | GC20M024986 | 9.330976486 | <a href="https://www.genecards.org/cgi-bin/carddisp.pl?gene=ACSS1">https://www.genecards.org/cgi-bin/carddisp.pl?gene=ACSS1</a>     |
| RRM2B   | Ribonucleotide Reductase Regulatory TP53 Inducible Subunit M2B | Protein Coding | 56 | GC08M102204 | 9.317185402 | <a href="https://www.genecards.org/cgi-bin/carddisp.pl?gene=RRM2B">https://www.genecards.org/cgi-bin/carddisp.pl?gene=RRM2B</a>     |
| B3GAT1  | Beta-1,3-Glucuronyltransferase 1                               | Protein Coding | 50 | GC11M134378 | 9.305902481 | <a href="https://www.genecards.org/cgi-bin/carddisp.pl?gene=B3GAT1">https://www.genecards.org/cgi-bin/carddisp.pl?gene=B3GAT1</a>   |
| MMP1    | Matrix Metalloproteinase 1                                     | Protein Coding | 57 | GC11M102810 | 9.27759552  | <a href="https://www.genecards.org/cgi-bin/carddisp.pl?gene=MMP1">https://www.genecards.org/cgi-bin/carddisp.pl?gene=MMP1</a>       |
| AOX1    | Aldehyde Oxidase 1                                             | Protein Coding | 51 | GC02P200585 | 9.275713921 | <a href="https://www.genecards.org/cgi-bin/carddisp.pl?gene=AOX1">https://www.genecards.org/cgi-bin/carddisp.pl?gene=AOX1</a>       |
| TFRC    | Transferrin Receptor                                           | Protein Coding | 58 | GC03M196056 | 9.241100311 | <a href="https://www.genecards.org/cgi-bin/carddisp.pl?gene=TFRC">https://www.genecards.org/cgi-bin/carddisp.pl?gene=TFRC</a>       |
| GAPDH   | Glyceraldehyde-3-Phosphate Dehydrogenase                       | Protein Coding | 57 | GC12P023539 | 9.224225998 | <a href="https://www.genecards.org/cgi-bin/carddisp.pl?gene=GAPDH">https://www.genecards.org/cgi-bin/carddisp.pl?gene=GAPDH</a>     |
| ALDH3A2 | Aldehyde Dehydrogenase 3 Family Member A2                      | Protein Coding | 52 | GC17P019648 | 9.220035553 | <a href="https://www.genecards.org/cgi-bin/carddisp.pl?gene=ALDH3A2">https://www.genecards.org/cgi-bin/carddisp.pl?gene=ALDH3A2</a> |
| CYP26A1 | Cytochrome P450 Family 26 Subfamily A Member 1                 | Protein Coding | 50 | GC10P093073 | 9.213516235 | <a href="https://www.genecards.org/cgi-bin/carddisp.pl?gene=CYP26A1">https://www.genecards.org/cgi-bin/carddisp.pl?gene=CYP26A1</a> |
| SELE    | Selectin E                                                     | Protein Coding | 50 | GC01M169722 | 9.211622238 | <a href="https://www.genecards.org/cgi-bin/carddisp.pl?gene=SELE">https://www.genecards.org/cgi-bin/carddisp.pl?gene=SELE</a>       |
| ODC1    | Ornithine Decarboxylase 1                                      | Protein Coding | 55 | GC02M010432 | 9.199753761 | <a href="https://www.genecards.org/cgi-bin/carddisp.pl?gene=ODC1">https://www.genecards.org/cgi-bin/carddisp.pl?gene=ODC1</a>       |
| SI      | Sucrase-Isomaltase                                             | Protein Coding | 51 | GC03M164978 | 9.185455322 | <a href="https://www.genecards.org/cgi-bin/carddisp.pl?gene=SI">https://www.genecards.org/cgi-bin/carddisp.pl?gene=SI</a>           |
| IL4     | Interleukin 4                                                  | Protein Coding | 53 | GC05P132673 | 9.176439285 | <a href="https://www.genecards.org/cgi-bin/carddisp.pl?gene=IL4">https://www.genecards.org/cgi-bin/carddisp.pl?gene=IL4</a>         |

|        |                                           |                |    |             |             |                                                                                                                                   |
|--------|-------------------------------------------|----------------|----|-------------|-------------|-----------------------------------------------------------------------------------------------------------------------------------|
| TGFB1  | Transforming Growth Factor Beta 1         | Protein Coding | 60 | GC19M041301 | 9.174732208 | <a href="https://www.genecards.org/cgi-bin/carddisp.pl?gene=TGFB1">https://www.genecards.org/cgi-bin/carddisp.pl?gene=TGFB1</a>   |
| CALCA  | Calcitonin Related Polypeptide Alpha      | Protein Coding | 50 | GC11M014945 | 9.166168213 | <a href="https://www.genecards.org/cgi-bin/carddisp.pl?gene=CALCA">https://www.genecards.org/cgi-bin/carddisp.pl?gene=CALCA</a>   |
| SARDH  | Sarcosine Dehydrogenase                   | Protein Coding | 48 | GC09M133663 | 9.150572777 | <a href="https://www.genecards.org/cgi-bin/carddisp.pl?gene=SARDH">https://www.genecards.org/cgi-bin/carddisp.pl?gene=SARDH</a>   |
| IRS2   | Insulin Receptor Substrate 2              | Protein Coding | 51 | GC13M109752 | 9.141462326 | <a href="https://www.genecards.org/cgi-bin/carddisp.pl?gene=IRS2">https://www.genecards.org/cgi-bin/carddisp.pl?gene=IRS2</a>     |
| TSHR   | Thyroid Stimulating Hormone Receptor      | Protein Coding | 54 | GC14P080954 | 9.134458542 | <a href="https://www.genecards.org/cgi-bin/carddisp.pl?gene=TSHR">https://www.genecards.org/cgi-bin/carddisp.pl?gene=TSHR</a>     |
| ABAT   | 4-Aminobutyrate Aminotransferase          | Protein Coding | 52 | GC16P008674 | 9.114062309 | <a href="https://www.genecards.org/cgi-bin/carddisp.pl?gene=ABAT">https://www.genecards.org/cgi-bin/carddisp.pl?gene=ABAT</a>     |
| PLA2G7 | Phospholipase A2 Group VII                | Protein Coding | 56 | GC06M046704 | 9.094242096 | <a href="https://www.genecards.org/cgi-bin/carddisp.pl?gene=PLA2G7">https://www.genecards.org/cgi-bin/carddisp.pl?gene=PLA2G7</a> |
| PPOX   | Protoporphyrinogen Oxidase                | Protein Coding | 50 | GC01P161793 | 9.073926926 | <a href="https://www.genecards.org/cgi-bin/carddisp.pl?gene=PPOX">https://www.genecards.org/cgi-bin/carddisp.pl?gene=PPOX</a>     |
| BSND   | Barttin CLCNK Type Accessory Subunit Beta | Protein Coding | 46 | GC01P054998 | 9.067605019 | <a href="https://www.genecards.org/cgi-bin/carddisp.pl?gene=BSND">https://www.genecards.org/cgi-bin/carddisp.pl?gene=BSND</a>     |
| NFE2L2 | NFE2 Like BZIP Transcription Factor 2     | Protein Coding | 57 | GC02M177227 | 9.067396164 | <a href="https://www.genecards.org/cgi-bin/carddisp.pl?gene=NFE2L2">https://www.genecards.org/cgi-bin/carddisp.pl?gene=NFE2L2</a> |
| TH     | Tyrosine Hydroxylase                      | Protein Coding | 57 | GC11M002163 | 9.036359787 | <a href="https://www.genecards.org/cgi-bin/carddisp.pl?gene=TH">https://www.genecards.org/cgi-bin/carddisp.pl?gene=TH</a>         |
| GLP1R  | Glucagon Like Peptide 1 Receptor          | Protein Coding | 53 | GC06P039048 | 9.011398315 | <a href="https://www.genecards.org/cgi-bin/carddisp.pl?gene=GLP1R">https://www.genecards.org/cgi-bin/carddisp.pl?gene=GLP1R</a>   |
| B2M    | Beta-2-Microglobulin                      | Protein Coding | 56 | GC15P044711 | 9.009315491 | <a href="https://www.genecards.org/cgi-bin/carddisp.pl?gene=B2M">https://www.genecards.org/cgi-bin/carddisp.pl?gene=B2M</a>       |
| ABCC4  | ATP Binding Cassette Subfamily C Member 4 | Protein Coding | 52 | GC13M095019 | 9.002803802 | <a href="https://www.genecards.org/cgi-bin/carddisp.pl?gene=ABCC4">https://www.genecards.org/cgi-bin/carddisp.pl?gene=ABCC4</a>   |
| FECH   | Ferrochelatase                            | Protein Coding | 53 | GC18M057544 | 8.987259865 | <a href="https://www.genecards.org/cgi-bin/carddisp.pl?gene=FECH">https://www.genecards.org/cgi-bin/carddisp.pl?gene=FECH</a>     |

|         |                                                 |                |    |             |             |                                                                                                                                     |
|---------|-------------------------------------------------|----------------|----|-------------|-------------|-------------------------------------------------------------------------------------------------------------------------------------|
| SCNN1B  | Sodium Channel Epithelial 1 Subunit Beta        | Protein Coding | 55 | GC16P023278 | 8.966176987 | <a href="https://www.genecards.org/cgi-bin/carddisp.pl?gene=SCNN1B">https://www.genecards.org/cgi-bin/carddisp.pl?gene=SCNN1B</a>   |
| CAV1    | Caveolin 1                                      | Protein Coding | 55 | GC07P116524 | 8.965511322 | <a href="https://www.genecards.org/cgi-bin/carddisp.pl?gene=CAV1">https://www.genecards.org/cgi-bin/carddisp.pl?gene=CAV1</a>       |
| PLA2G6  | Phospholipase A2 Group VI                       | Protein Coding | 54 | GC22M063106 | 8.922856331 | <a href="https://www.genecards.org/cgi-bin/carddisp.pl?gene=PLA2G6">https://www.genecards.org/cgi-bin/carddisp.pl?gene=PLA2G6</a>   |
| SLC9A3  | Solute Carrier Family 9 Member A3               | Protein Coding | 54 | GC05M000472 | 8.890376091 | <a href="https://www.genecards.org/cgi-bin/carddisp.pl?gene=SLC9A3">https://www.genecards.org/cgi-bin/carddisp.pl?gene=SLC9A3</a>   |
| KRAS    | KRAS Proto-Oncogene, GTPase                     | Protein Coding | 59 | GC12M025204 | 8.88931179  | <a href="https://www.genecards.org/cgi-bin/carddisp.pl?gene=KRAS">https://www.genecards.org/cgi-bin/carddisp.pl?gene=KRAS</a>       |
| ACSS3   | Acyl-CoA Synthetase Short Chain Family Member 3 | Protein Coding | 44 | GC12P080936 | 8.88329792  | <a href="https://www.genecards.org/cgi-bin/carddisp.pl?gene=ACSS3">https://www.genecards.org/cgi-bin/carddisp.pl?gene=ACSS3</a>     |
| PNLIP   | Pancreatic Lipase                               | Protein Coding | 55 | GC10P116545 | 8.861320496 | <a href="https://www.genecards.org/cgi-bin/carddisp.pl?gene=PNLIP">https://www.genecards.org/cgi-bin/carddisp.pl?gene=PNLIP</a>     |
| WNK1    | WNK Lysine Deficient Protein Kinase 1           | Protein Coding | 55 | GC12P000733 | 8.852413177 | <a href="https://www.genecards.org/cgi-bin/carddisp.pl?gene=WNK1">https://www.genecards.org/cgi-bin/carddisp.pl?gene=WNK1</a>       |
| AMACR   | Alpha-Methylacyl-CoA Racemase                   | Protein Coding | 51 | GC05M033986 | 8.844797134 | <a href="https://www.genecards.org/cgi-bin/carddisp.pl?gene=AMACR">https://www.genecards.org/cgi-bin/carddisp.pl?gene=AMACR</a>     |
| TPO     | Thyroid Peroxidase                              | Protein Coding | 56 | GC02P001374 | 8.836055756 | <a href="https://www.genecards.org/cgi-bin/carddisp.pl?gene=TPO">https://www.genecards.org/cgi-bin/carddisp.pl?gene=TPO</a>         |
| PLTP    | Phospholipid Transfer Protein                   | Protein Coding | 51 | GC20M045898 | 8.819312096 | <a href="https://www.genecards.org/cgi-bin/carddisp.pl?gene=PLTP">https://www.genecards.org/cgi-bin/carddisp.pl?gene=PLTP</a>       |
| PLA2G2A | Phospholipase A2 Group IIA                      | Protein Coding | 53 | GC01M019975 | 8.813098907 | <a href="https://www.genecards.org/cgi-bin/carddisp.pl?gene=PLA2G2A">https://www.genecards.org/cgi-bin/carddisp.pl?gene=PLA2G2A</a> |
| CBLIF   | Cobalamin Binding Intrinsic Factor              | Protein Coding | 50 | GC11M059829 | 8.777448654 | <a href="https://www.genecards.org/cgi-bin/carddisp.pl?gene=CBLIF">https://www.genecards.org/cgi-bin/carddisp.pl?gene=CBLIF</a>     |
| ALOX12  | Arachidonate 12-Lipoxygenase, 12S Type          | Protein Coding | 51 | GC17P006995 | 8.752995491 | <a href="https://www.genecards.org/cgi-bin/carddisp.pl?gene=ALOX12">https://www.genecards.org/cgi-bin/carddisp.pl?gene=ALOX12</a>   |
| PEPD    | Peptidase D                                     | Protein Coding | 52 | GC19M033386 | 8.72979641  | <a href="https://www.genecards.org/cgi-bin/carddisp.pl?gene=PEPD">https://www.genecards.org/cgi-bin/carddisp.pl?gene=PEPD</a>       |

|          |                                                                          |                |    |             |             |                                                                                                                                       |
|----------|--------------------------------------------------------------------------|----------------|----|-------------|-------------|---------------------------------------------------------------------------------------------------------------------------------------|
| MAOB     | Monoamine Oxidase B                                                      | Protein Coding | 51 | GC0XM043766 | 8.728715897 | <a href="https://www.genecards.org/cgi-bin/carddisp.pl?gene=MAOB">https://www.genecards.org/cgi-bin/carddisp.pl?gene=MAOB</a>         |
| SUCLG1   | Succinate-CoA Ligase GDP/ADP-Forming Subunit Alpha                       | Protein Coding | 53 | GC02M084423 | 8.726793289 | <a href="https://www.genecards.org/cgi-bin/carddisp.pl?gene=SUCLG1">https://www.genecards.org/cgi-bin/carddisp.pl?gene=SUCLG1</a>     |
| NR1H3    | Nuclear Receptor Subfamily 1 Group H Member 3                            | Protein Coding | 53 | GC11P047248 | 8.693900108 | <a href="https://www.genecards.org/cgi-bin/carddisp.pl?gene=NR1H3">https://www.genecards.org/cgi-bin/carddisp.pl?gene=NR1H3</a>       |
| ALDOA    | Aldolase, Fructose-Bisphosphate A                                        | Protein Coding | 55 | GC16P030064 | 8.690598488 | <a href="https://www.genecards.org/cgi-bin/carddisp.pl?gene=ALDOA">https://www.genecards.org/cgi-bin/carddisp.pl?gene=ALDOA</a>       |
| TALDO1   | Transaldolase 1                                                          | Protein Coding | 53 | GC11P002101 | 8.67280674  | <a href="https://www.genecards.org/cgi-bin/carddisp.pl?gene=TALDO1">https://www.genecards.org/cgi-bin/carddisp.pl?gene=TALDO1</a>     |
| PIK3C2A  | Phosphatidylinositol-4-Phosphate 3-Kinase Catalytic Subunit Type 2 Alpha | Protein Coding | 54 | GC11M017656 | 8.672620773 | <a href="https://www.genecards.org/cgi-bin/carddisp.pl?gene=PIK3C2A">https://www.genecards.org/cgi-bin/carddisp.pl?gene=PIK3C2A</a>   |
| MIR132   | MicroRNA 132                                                             | RNA Gene       | 24 | GC17M002049 | 8.668548584 | <a href="https://www.genecards.org/cgi-bin/carddisp.pl?gene=MIR132">https://www.genecards.org/cgi-bin/carddisp.pl?gene=MIR132</a>     |
| ALDH7A1  | Aldehyde Dehydrogenase 7 Family Member A1                                | Protein Coding | 55 | GC05M126541 | 8.663873672 | <a href="https://www.genecards.org/cgi-bin/carddisp.pl?gene=ALDH7A1">https://www.genecards.org/cgi-bin/carddisp.pl?gene=ALDH7A1</a>   |
| IGF1R    | Insulin Like Growth Factor 1 Receptor                                    | Protein Coding | 61 | GC15P098648 | 8.65890789  | <a href="https://www.genecards.org/cgi-bin/carddisp.pl?gene=IGF1R">https://www.genecards.org/cgi-bin/carddisp.pl?gene=IGF1R</a>       |
| SERPINA6 | Serpin Family A Member 6                                                 | Protein Coding | 52 | GC14M103107 | 8.658004761 | <a href="https://www.genecards.org/cgi-bin/carddisp.pl?gene=SERPINA6">https://www.genecards.org/cgi-bin/carddisp.pl?gene=SERPINA6</a> |
| MYC      | MYC Proto-Oncogene, BHLH Transcription Factor                            | Protein Coding | 59 | GC08P127735 | 8.656543732 | <a href="https://www.genecards.org/cgi-bin/carddisp.pl?gene=MYC">https://www.genecards.org/cgi-bin/carddisp.pl?gene=MYC</a>           |
| FAS      | Fas Cell Surface Death Receptor                                          | Protein Coding | 57 | GC10P094616 | 8.649011612 | <a href="https://www.genecards.org/cgi-bin/carddisp.pl?gene=FAS">https://www.genecards.org/cgi-bin/carddisp.pl?gene=FAS</a>           |
| HAL      | Histidine Ammonia-Lyase                                                  | Protein Coding | 50 | GC12M095972 | 8.647676468 | <a href="https://www.genecards.org/cgi-bin/carddisp.pl?gene=HAL">https://www.genecards.org/cgi-bin/carddisp.pl?gene=HAL</a>           |
| AKR1C3   | Aldo-Keto Reductase Family 1 Member C3                                   | Protein Coding | 52 | GC10P005035 | 8.643188477 | <a href="https://www.genecards.org/cgi-bin/carddisp.pl?gene=AKR1C3">https://www.genecards.org/cgi-bin/carddisp.pl?gene=AKR1C3</a>     |
| VEGFA    | Vascular Endothelial Growth Factor A                                     | Protein Coding | 56 | GC06P043770 | 8.640114784 | <a href="https://www.genecards.org/cgi-bin/carddisp.pl?gene=VEGFA">https://www.genecards.org/cgi-bin/carddisp.pl?gene=VEGFA</a>       |

|        |                                                |                |    |             |             |                                                                                                                                   |
|--------|------------------------------------------------|----------------|----|-------------|-------------|-----------------------------------------------------------------------------------------------------------------------------------|
| NPPA   | Natriuretic Peptide A                          | Protein Coding | 52 | GC01M011846 | 8.623929024 | <a href="https://www.genecards.org/cgi-bin/carddisp.pl?gene=NPPA">https://www.genecards.org/cgi-bin/carddisp.pl?gene=NPPA</a>     |
| IGF2   | Insulin Like Growth Factor 2                   | Protein Coding | 55 | GC11M004506 | 8.617035866 | <a href="https://www.genecards.org/cgi-bin/carddisp.pl?gene=IGF2">https://www.genecards.org/cgi-bin/carddisp.pl?gene=IGF2</a>     |
| NAT1   | N-Acetyltransferase 1                          | Protein Coding | 50 | GC08P018183 | 8.583248138 | <a href="https://www.genecards.org/cgi-bin/carddisp.pl?gene=NAT1">https://www.genecards.org/cgi-bin/carddisp.pl?gene=NAT1</a>     |
| CYB5A  | Cytochrome B5 Type A                           | Protein Coding | 50 | GC18M074250 | 8.580019951 | <a href="https://www.genecards.org/cgi-bin/carddisp.pl?gene=CYB5A">https://www.genecards.org/cgi-bin/carddisp.pl?gene=CYB5A</a>   |
| SOD2   | Superoxide Dismutase 2                         | Protein Coding | 53 | GC06M159669 | 8.579874039 | <a href="https://www.genecards.org/cgi-bin/carddisp.pl?gene=SOD2">https://www.genecards.org/cgi-bin/carddisp.pl?gene=SOD2</a>     |
| TLR4   | Toll Like Receptor 4                           | Protein Coding | 58 | GC09P117704 | 8.57736969  | <a href="https://www.genecards.org/cgi-bin/carddisp.pl?gene=TLR4">https://www.genecards.org/cgi-bin/carddisp.pl?gene=TLR4</a>     |
| AGK    | Acylglycerol Kinase                            | Protein Coding | 47 | GC07P141551 | 8.569777489 | <a href="https://www.genecards.org/cgi-bin/carddisp.pl?gene=AGK">https://www.genecards.org/cgi-bin/carddisp.pl?gene=AGK</a>       |
| AGPAT2 | 1-Acylglycerol-3-Phosphate O-Acyltransferase 2 | Protein Coding | 52 | GC09M136673 | 8.565602303 | <a href="https://www.genecards.org/cgi-bin/carddisp.pl?gene=AGPAT2">https://www.genecards.org/cgi-bin/carddisp.pl?gene=AGPAT2</a> |
| SRD5A1 | Steroid 5 Alpha-Reductase 1                    | Protein Coding | 50 | GC05P006633 | 8.563120842 | <a href="https://www.genecards.org/cgi-bin/carddisp.pl?gene=SRD5A1">https://www.genecards.org/cgi-bin/carddisp.pl?gene=SRD5A1</a> |
| FBN1   | Fibrillin 1                                    | Protein Coding | 53 | GC15M048408 | 8.536642075 | <a href="https://www.genecards.org/cgi-bin/carddisp.pl?gene=FBN1">https://www.genecards.org/cgi-bin/carddisp.pl?gene=FBN1</a>     |
| IL5    | Interleukin 5                                  | Protein Coding | 52 | GC05M132541 | 8.535798073 | <a href="https://www.genecards.org/cgi-bin/carddisp.pl?gene=IL5">https://www.genecards.org/cgi-bin/carddisp.pl?gene=IL5</a>       |
| GLS    | Glutaminase                                    | Protein Coding | 56 | GC02P190880 | 8.528938293 | <a href="https://www.genecards.org/cgi-bin/carddisp.pl?gene=GLS">https://www.genecards.org/cgi-bin/carddisp.pl?gene=GLS</a>       |
| EDN1   | Endothelin 1                                   | Protein Coding | 55 | GC06P012256 | 8.526630402 | <a href="https://www.genecards.org/cgi-bin/carddisp.pl?gene=EDN1">https://www.genecards.org/cgi-bin/carddisp.pl?gene=EDN1</a>     |
| GALC   | Galactosylceramidase                           | Protein Coding | 51 | GC14M087837 | 8.512210846 | <a href="https://www.genecards.org/cgi-bin/carddisp.pl?gene=GALC">https://www.genecards.org/cgi-bin/carddisp.pl?gene=GALC</a>     |
| MMP9   | Matrix Metalloproteinase 9                     | Protein Coding | 61 | GC20P046008 | 8.467338562 | <a href="https://www.genecards.org/cgi-bin/carddisp.pl?gene=MMP9">https://www.genecards.org/cgi-bin/carddisp.pl?gene=MMP9</a>     |

|         |                                                 |                |    |             |             |                                                                                                                                     |
|---------|-------------------------------------------------|----------------|----|-------------|-------------|-------------------------------------------------------------------------------------------------------------------------------------|
| SPP1    | Secreted Phosphoprotein 1                       | Protein Coding | 53 | GC04P087975 | 8.406263351 | <a href="https://www.genecards.org/cgi-bin/carddisp.pl?gene=SPP1">https://www.genecards.org/cgi-bin/carddisp.pl?gene=SPP1</a>       |
| SOAT1   | Sterol O-Acyltransferase 1                      | Protein Coding | 51 | GC01P179262 | 8.406112671 | <a href="https://www.genecards.org/cgi-bin/carddisp.pl?gene=SOAT1">https://www.genecards.org/cgi-bin/carddisp.pl?gene=SOAT1</a>     |
| FGFR1   | Fibroblast Growth Factor Receptor 1             | Protein Coding | 63 | GC08M038400 | 8.392232895 | <a href="https://www.genecards.org/cgi-bin/carddisp.pl?gene=FGFR1">https://www.genecards.org/cgi-bin/carddisp.pl?gene=FGFR1</a>     |
| MME     | Membrane Metalloendopeptidase                   | Protein Coding | 57 | GC03P155024 | 8.376724243 | <a href="https://www.genecards.org/cgi-bin/carddisp.pl?gene=MME">https://www.genecards.org/cgi-bin/carddisp.pl?gene=MME</a>         |
| FOXO3   | Forkhead Box O3                                 | Protein Coding | 53 | GC06P108559 | 8.376056671 | <a href="https://www.genecards.org/cgi-bin/carddisp.pl?gene=FOXO3">https://www.genecards.org/cgi-bin/carddisp.pl?gene=FOXO3</a>     |
| GLUL    | Glutamate-Ammonia Ligase                        | Protein Coding | 55 | GC01M182378 | 8.333607674 | <a href="https://www.genecards.org/cgi-bin/carddisp.pl?gene=GLUL">https://www.genecards.org/cgi-bin/carddisp.pl?gene=GLUL</a>       |
| CA2     | Carbonic Anhydrase 2                            | Protein Coding | 59 | GC08P085463 | 8.320440292 | <a href="https://www.genecards.org/cgi-bin/carddisp.pl?gene=CA2">https://www.genecards.org/cgi-bin/carddisp.pl?gene=CA2</a>         |
| GLA     | Galactosidase Alpha                             | Protein Coding | 56 | GC0XM101393 | 8.318837166 | <a href="https://www.genecards.org/cgi-bin/carddisp.pl?gene=GLA">https://www.genecards.org/cgi-bin/carddisp.pl?gene=GLA</a>         |
| ALAD    | Aminolevulinate Dehydratase                     | Protein Coding | 53 | GC09M113386 | 8.308020592 | <a href="https://www.genecards.org/cgi-bin/carddisp.pl?gene=ALAD">https://www.genecards.org/cgi-bin/carddisp.pl?gene=ALAD</a>       |
| UGT2B15 | UDP Glucuronosyltransferase Family 2 Member B15 | Protein Coding | 50 | GC04M068646 | 8.296926498 | <a href="https://www.genecards.org/cgi-bin/carddisp.pl?gene=UGT2B15">https://www.genecards.org/cgi-bin/carddisp.pl?gene=UGT2B15</a> |
| ACOX1   | Acyl-CoA Oxidase 1                              | Protein Coding | 52 | GC17M075941 | 8.251636505 | <a href="https://www.genecards.org/cgi-bin/carddisp.pl?gene=ACOX1">https://www.genecards.org/cgi-bin/carddisp.pl?gene=ACOX1</a>     |
| AKR1C2  | Aldo-Keto Reductase Family 1 Member C2          | Protein Coding | 52 | GC10M004987 | 8.24772644  | <a href="https://www.genecards.org/cgi-bin/carddisp.pl?gene=AKR1C2">https://www.genecards.org/cgi-bin/carddisp.pl?gene=AKR1C2</a>   |
| IGF2R   | Insulin Like Growth Factor 2 Receptor           | Protein Coding | 52 | GC06P159969 | 8.232765198 | <a href="https://www.genecards.org/cgi-bin/carddisp.pl?gene=IGF2R">https://www.genecards.org/cgi-bin/carddisp.pl?gene=IGF2R</a>     |
| LPA     | Lipoprotein(A)                                  | Protein Coding | 44 | GC06M160531 | 8.226680756 | <a href="https://www.genecards.org/cgi-bin/carddisp.pl?gene=LPA">https://www.genecards.org/cgi-bin/carddisp.pl?gene=LPA</a>         |
| AKR1B1  | Aldo-Keto Reductase Family 1 Member B           | Protein Coding | 53 | GC07M134442 | 8.226289749 | <a href="https://www.genecards.org/cgi-bin/carddisp.pl?gene=MMP9">https://www.genecards.org/cgi-bin/carddisp.pl?gene=MMP9</a>       |

|          |                                                       |                |    |             |             |                                                                                                                                     |
|----------|-------------------------------------------------------|----------------|----|-------------|-------------|-------------------------------------------------------------------------------------------------------------------------------------|
| CLOCK    | Clock Circadian Regulator                             | Protein Coding | 51 | GC04M055427 | 8.168092728 | <a href="https://www.genecards.org/cgi-bin/carddisp.pl?gene=AKR1B1">https://www.genecards.org/cgi-bin/carddisp.pl?gene=AKR1B1</a>   |
| GPX1     | Glutathione Peroxidase 1                              | Protein Coding | 52 | GC03M051566 | 8.151756287 | <a href="https://www.genecards.org/cgi-bin/carddisp.pl?gene=CLOCK">https://www.genecards.org/cgi-bin/carddisp.pl?gene=CLOCK</a>     |
| MIR22    | MicroRNA 22                                           | RNA Gene       | 23 | GC17M001713 | 8.137874603 | <a href="https://www.genecards.org/cgi-bin/carddisp.pl?gene=GPX1">https://www.genecards.org/cgi-bin/carddisp.pl?gene=GPX1</a>       |
| ALDH1A1  | Aldehyde Dehydrogenase 1 Family Member A1             | Protein Coding | 54 | GC09M072900 | 8.133259773 | <a href="https://www.genecards.org/cgi-bin/carddisp.pl?gene=MIR22">https://www.genecards.org/cgi-bin/carddisp.pl?gene=MIR22</a>     |
| COG2     | Component Of Oligomeric Golgi Complex 2               | Protein Coding | 47 | GC01P230642 | 8.130456924 | <a href="https://www.genecards.org/cgi-bin/carddisp.pl?gene=ALDH1A1">https://www.genecards.org/cgi-bin/carddisp.pl?gene=ALDH1A1</a> |
| UROD     | Uroporphyrinogen Decarboxylase                        | Protein Coding | 52 | GC01P045458 | 8.115438461 | <a href="https://www.genecards.org/cgi-bin/carddisp.pl?gene=COG2">https://www.genecards.org/cgi-bin/carddisp.pl?gene=COG2</a>       |
| BRCA1    | BRCA1 DNA Repair Associated                           | Protein Coding | 56 | GC17M043044 | 8.113157272 | <a href="https://www.genecards.org/cgi-bin/carddisp.pl?gene=UROD">https://www.genecards.org/cgi-bin/carddisp.pl?gene=UROD</a>       |
| CLCNKA   | Chloride Voltage-Gated Channel Ka                     | Protein Coding | 47 | GC01P016018 | 8.101045609 | <a href="https://www.genecards.org/cgi-bin/carddisp.pl?gene=BRCA1">https://www.genecards.org/cgi-bin/carddisp.pl?gene=BRCA1</a>     |
| EPM2A    | EPM2A Glucan Phosphatase, Laforin                     | Protein Coding | 50 | GC06M145382 | 8.040835381 | <a href="https://www.genecards.org/cgi-bin/carddisp.pl?gene=CLCNKA">https://www.genecards.org/cgi-bin/carddisp.pl?gene=CLCNKA</a>   |
| JUN      | Jun Proto-Oncogene, AP-1 Transcription Factor Subunit | Protein Coding | 55 | GC01M058780 | 8.033901215 | <a href="https://www.genecards.org/cgi-bin/carddisp.pl?gene=EPM2A">https://www.genecards.org/cgi-bin/carddisp.pl?gene=EPM2A</a>     |
| SLC52A2  | Solute Carrier Family 52 Member 2                     | Protein Coding | 46 | GC08P144333 | 8.015874863 | <a href="https://www.genecards.org/cgi-bin/carddisp.pl?gene=JUN">https://www.genecards.org/cgi-bin/carddisp.pl?gene=JUN</a>         |
| AHSG     | Alpha 2-HS Glycoprotein                               | Protein Coding | 51 | GC03P186636 | 8.000261307 | <a href="https://www.genecards.org/cgi-bin/carddisp.pl?gene=SLC52A2">https://www.genecards.org/cgi-bin/carddisp.pl?gene=SLC52A2</a> |
| FFAR3    | Free Fatty Acid Receptor 3                            | Protein Coding | 44 | GC19P073871 | 7.985510826 | <a href="https://www.genecards.org/cgi-bin/carddisp.pl?gene=AHSG">https://www.genecards.org/cgi-bin/carddisp.pl?gene=AHSG</a>       |
| DSP      | Desmoplakin                                           | Protein Coding | 57 | GC06P007541 | 7.967627048 | <a href="https://www.genecards.org/cgi-bin/carddisp.pl?gene=FFAR3">https://www.genecards.org/cgi-bin/carddisp.pl?gene=FFAR3</a>     |
| TNFRSF11 | TNF Receptor Superfamily Member 11b                   | Protein Coding | 54 | GC08M118923 | 7.947682381 | <a href="https://www.genecards.org/cgi-bin/carddisp.pl?gene=DSP">https://www.genecards.org/cgi-bin/carddisp.pl?gene=DSP</a>         |

| Gene Symbol | Gene Name                                         | Category       | Chromosome | Gene ID     | RefSeq ID   | NCBI Link                                                                                                                               |
|-------------|---------------------------------------------------|----------------|------------|-------------|-------------|-----------------------------------------------------------------------------------------------------------------------------------------|
| ACO1        | Aconitase 1                                       | Protein Coding | 51         | GC09P032374 | 7.935599327 | <a href="https://www.genecards.org/cgi-bin/carddisp.pl?gene=ACO1">https://www.genecards.org/cgi-bin/carddisp.pl?gene=ACO1</a>           |
| APC         | APC Regulator Of WNT Signaling Pathway            | Protein Coding | 56         | GC05P112707 | 7.932646751 | <a href="https://www.genecards.org/cgi-bin/carddisp.pl?gene=APC">https://www.genecards.org/cgi-bin/carddisp.pl?gene=APC</a>             |
| CASP8       | Caspase 8                                         | Protein Coding | 59         | GC02P201233 | 7.92381525  | <a href="https://www.genecards.org/cgi-bin/carddisp.pl?gene=CASP8">https://www.genecards.org/cgi-bin/carddisp.pl?gene=CASP8</a>         |
| GHR         | Growth Hormone Receptor                           | Protein Coding | 53         | GC05P042429 | 7.920368671 | <a href="https://www.genecards.org/cgi-bin/carddisp.pl?gene=GHR">https://www.genecards.org/cgi-bin/carddisp.pl?gene=GHR</a>             |
| FGFR4       | Fibroblast Growth Factor Receptor 4               | Protein Coding | 59         | GC05P177086 | 7.900533676 | <a href="https://www.genecards.org/cgi-bin/carddisp.pl?gene=FGFR4">https://www.genecards.org/cgi-bin/carddisp.pl?gene=FGFR4</a>         |
| LBR         | Lamin B Receptor                                  | Protein Coding | 54         | GC01M225401 | 7.891428947 | <a href="https://www.genecards.org/cgi-bin/carddisp.pl?gene=LBR">https://www.genecards.org/cgi-bin/carddisp.pl?gene=LBR</a>             |
| TDO2        | Tryptophan 2,3-Dioxygenase                        | Protein Coding | 53         | GC04P155854 | 7.886833191 | <a href="https://www.genecards.org/cgi-bin/carddisp.pl?gene=TDO2">https://www.genecards.org/cgi-bin/carddisp.pl?gene=TDO2</a>           |
| NOS2        | Nitric Oxide Synthase 2                           | Protein Coding | 56         | GC17M027756 | 7.879232407 | <a href="https://www.genecards.org/cgi-bin/carddisp.pl?gene=NOS2">https://www.genecards.org/cgi-bin/carddisp.pl?gene=NOS2</a>           |
| DBH         | Dopamine Beta-Hydroxylase                         | Protein Coding | 59         | GC09P133636 | 7.875431061 | <a href="https://www.genecards.org/cgi-bin/carddisp.pl?gene=DBH">https://www.genecards.org/cgi-bin/carddisp.pl?gene=DBH</a>             |
| GUSB        | Glucuronidase Beta                                | Protein Coding | 54         | GC07M065960 | 7.864967823 | <a href="https://www.genecards.org/cgi-bin/carddisp.pl?gene=GUSB">https://www.genecards.org/cgi-bin/carddisp.pl?gene=GUSB</a>           |
| GRIA4       | Glutamate Ionotropic Receptor AMPA Type Subunit 4 | Protein Coding | 56         | GC11P105609 | 7.864396095 | <a href="https://www.genecards.org/cgi-bin/carddisp.pl?gene=GRIA4">https://www.genecards.org/cgi-bin/carddisp.pl?gene=GRIA4</a>         |
| PKLR        | Pyruvate Kinase L/R                               | Protein Coding | 53         | GC01M155289 | 7.860248566 | <a href="https://www.genecards.org/cgi-bin/carddisp.pl?gene=PKLR">https://www.genecards.org/cgi-bin/carddisp.pl?gene=PKLR</a>           |
| TKT         | Transketolase                                     | Protein Coding | 52         | GC03M053224 | 7.831721306 | <a href="https://www.genecards.org/cgi-bin/carddisp.pl?gene=TKT">https://www.genecards.org/cgi-bin/carddisp.pl?gene=TKT</a>             |
| TSPO        | Translocator Protein                              | Protein Coding | 51         | GC22P043151 | 7.831576824 | <a href="https://www.genecards.org/cgi-bin/carddisp.pl?gene=TSPO">https://www.genecards.org/cgi-bin/carddisp.pl?gene=TSPO</a>           |
| ELANE       | Elastase, Neutrophil Expressed                    | Protein Coding | 58         | GC19P003656 | 7.827675819 | <a href="https://www.genecards.org/cgi-bin/carddisp.pl?gene=TNFRSF11B">https://www.genecards.org/cgi-bin/carddisp.pl?gene=TNFRSF11B</a> |

|        |                                                  |                |    |             |             |                                                                                                                                   |
|--------|--------------------------------------------------|----------------|----|-------------|-------------|-----------------------------------------------------------------------------------------------------------------------------------|
| ACSM3  | Acyl-CoA Synthetase Medium Chain Family Member 3 | Protein Coding | 46 | GC16P020610 | 7.801516533 | <a href="https://www.genecards.org/cgi-bin/carddisp.pl?gene=ELANE">https://www.genecards.org/cgi-bin/carddisp.pl?gene=ELANE</a>   |
| FTH1   | Ferritin Heavy Chain 1                           | Protein Coding | 57 | GC11M061959 | 7.793233395 | <a href="https://www.genecards.org/cgi-bin/carddisp.pl?gene=ACSM3">https://www.genecards.org/cgi-bin/carddisp.pl?gene=ACSM3</a>   |
| SNCA   | Synuclein Alpha                                  | Protein Coding | 59 | GC04M089724 | 7.786792278 | <a href="https://www.genecards.org/cgi-bin/carddisp.pl?gene=FTH1">https://www.genecards.org/cgi-bin/carddisp.pl?gene=FTH1</a>     |
| ATM    | ATM Serine/Threonine Kinase                      | Protein Coding | 60 | GC11P108222 | 7.77983284  | <a href="https://www.genecards.org/cgi-bin/carddisp.pl?gene=SNCA">https://www.genecards.org/cgi-bin/carddisp.pl?gene=SNCA</a>     |
| APOA4  | Apolipoprotein A4                                | Protein Coding | 48 | GC11M116820 | 7.776916027 | <a href="https://www.genecards.org/cgi-bin/carddisp.pl?gene=ATM">https://www.genecards.org/cgi-bin/carddisp.pl?gene=ATM</a>       |
| PIK3R1 | Phosphoinositide-3-Kinase Regulatory Subunit 1   | Protein Coding | 57 | GC05P068215 | 7.765260696 | <a href="https://www.genecards.org/cgi-bin/carddisp.pl?gene=APOA4">https://www.genecards.org/cgi-bin/carddisp.pl?gene=APOA4</a>   |
| DNMT1  | DNA Methyltransferase 1                          | Protein Coding | 59 | GC19M010133 | 7.755319595 | <a href="https://www.genecards.org/cgi-bin/carddisp.pl?gene=PIK3R1">https://www.genecards.org/cgi-bin/carddisp.pl?gene=PIK3R1</a> |
| SUCLA2 | Succinate-CoA Ligase ADP-Forming Subunit Beta    | Protein Coding | 53 | GC13M047745 | 7.749754429 | <a href="https://www.genecards.org/cgi-bin/carddisp.pl?gene=DNMT1">https://www.genecards.org/cgi-bin/carddisp.pl?gene=DNMT1</a>   |
| ICAM1  | Intercellular Adhesion Molecule 1                | Protein Coding | 57 | GC19P010749 | 7.744787693 | <a href="https://www.genecards.org/cgi-bin/carddisp.pl?gene=SUCLA2">https://www.genecards.org/cgi-bin/carddisp.pl?gene=SUCLA2</a> |
| MEN1   | Menin 1                                          | Protein Coding | 51 | GC11M064803 | 7.738993168 | <a href="https://www.genecards.org/cgi-bin/carddisp.pl?gene=ICAM1">https://www.genecards.org/cgi-bin/carddisp.pl?gene=ICAM1</a>   |
| FTL    | Ferritin Light Chain                             | Protein Coding | 52 | GC19P048965 | 7.7378335   | <a href="https://www.genecards.org/cgi-bin/carddisp.pl?gene=MEN1">https://www.genecards.org/cgi-bin/carddisp.pl?gene=MEN1</a>     |
| OXA1L  | OXA1L Mitochondrial Inner Membrane Protein       | Protein Coding | 45 | GC14P022766 | 7.737726212 | <a href="https://www.genecards.org/cgi-bin/carddisp.pl?gene=FTL">https://www.genecards.org/cgi-bin/carddisp.pl?gene=FTL</a>       |
| TPH1   | Tryptophan Hydroxylase 1                         | Protein Coding | 52 | GC11M018040 | 7.725982666 | <a href="https://www.genecards.org/cgi-bin/carddisp.pl?gene=OXA1L">https://www.genecards.org/cgi-bin/carddisp.pl?gene=OXA1L</a>   |
| COX4I1 | Cytochrome C Oxidase Subunit 4I1                 | Protein Coding | 52 | GC16P085798 | 7.713577747 | <a href="https://www.genecards.org/cgi-bin/carddisp.pl?gene=TPH1">https://www.genecards.org/cgi-bin/carddisp.pl?gene=TPH1</a>     |
| SLC9A1 | Solute Carrier Family 9 Member A1                | Protein Coding | 57 | GC01M027239 | 7.711806297 | <a href="https://www.genecards.org/cgi-bin/carddisp.pl?gene=COX4I1">https://www.genecards.org/cgi-bin/carddisp.pl?gene=COX4I1</a> |

|         |                                                                        |                |    |             |             |                                                                                                                                     |
|---------|------------------------------------------------------------------------|----------------|----|-------------|-------------|-------------------------------------------------------------------------------------------------------------------------------------|
| GCH1    | GTP Cyclohydrolase 1                                                   | Protein Coding | 53 | GC14M054842 | 7.711480618 | <a href="https://www.genecards.org/cgi-bin/carddisp.pl?gene=SLC9A1">https://www.genecards.org/cgi-bin/carddisp.pl?gene=SLC9A1</a>   |
| AKR1C1  | Aldo-Keto Reductase Family 1 Member C1                                 | Protein Coding | 50 | GC10P004963 | 7.708277702 | <a href="https://www.genecards.org/cgi-bin/carddisp.pl?gene=GCH1">https://www.genecards.org/cgi-bin/carddisp.pl?gene=GCH1</a>       |
| F12     | Coagulation Factor XII                                                 | Protein Coding | 56 | GC05M177402 | 7.694033146 | <a href="https://www.genecards.org/cgi-bin/carddisp.pl?gene=AKR1C1">https://www.genecards.org/cgi-bin/carddisp.pl?gene=AKR1C1</a>   |
| ABHD5   | Abhydrolase Domain Containing 5, Lysophosphatidic Acid Acyltransferase | Protein Coding | 51 | GC03P043707 | 7.663006783 | <a href="https://www.genecards.org/cgi-bin/carddisp.pl?gene=F12">https://www.genecards.org/cgi-bin/carddisp.pl?gene=F12</a>         |
| AMN     | Amnion Associated Transmembrane Protein                                | Protein Coding | 47 | GC14P102922 | 7.659276962 | <a href="https://www.genecards.org/cgi-bin/carddisp.pl?gene=ABHD5">https://www.genecards.org/cgi-bin/carddisp.pl?gene=ABHD5</a>     |
| NR0B2   | Nuclear Receptor Subfamily 0 Group B Member 2                          | Protein Coding | 50 | GC01M027236 | 7.647449017 | <a href="https://www.genecards.org/cgi-bin/carddisp.pl?gene=AMN">https://www.genecards.org/cgi-bin/carddisp.pl?gene=AMN</a>         |
| CRAT    | Carnitine O-Acetyltransferase                                          | Protein Coding | 51 | GC09M129094 | 7.64017868  | <a href="https://www.genecards.org/cgi-bin/carddisp.pl?gene=NR0B2">https://www.genecards.org/cgi-bin/carddisp.pl?gene=NR0B2</a>     |
| ALDH1B1 | Aldehyde Dehydrogenase 1 Family Member B1                              | Protein Coding | 50 | GC09P038392 | 7.639844418 | <a href="https://www.genecards.org/cgi-bin/carddisp.pl?gene=CRAT">https://www.genecards.org/cgi-bin/carddisp.pl?gene=CRAT</a>       |
| AFP     | Alpha Fetoprotein                                                      | Protein Coding | 53 | GC04P073431 | 7.626152992 | <a href="https://www.genecards.org/cgi-bin/carddisp.pl?gene=ALDH1B1">https://www.genecards.org/cgi-bin/carddisp.pl?gene=ALDH1B1</a> |
| UGT1A5  | UDP Glucuronosyltransferase Family 1 Member A5                         | Protein Coding | 40 | GC02P233712 | 7.624723434 | <a href="https://www.genecards.org/cgi-bin/carddisp.pl?gene=AFP">https://www.genecards.org/cgi-bin/carddisp.pl?gene=AFP</a>         |
| CTNNB1  | Catenin Beta 1                                                         | Protein Coding | 60 | GC03P041194 | 7.623961449 | <a href="https://www.genecards.org/cgi-bin/carddisp.pl?gene=UGT1A5">https://www.genecards.org/cgi-bin/carddisp.pl?gene=UGT1A5</a>   |
| SLC5A8  | Solute Carrier Family 5 Member 8                                       | Protein Coding | 49 | GC12M101155 | 7.623325348 | <a href="https://www.genecards.org/cgi-bin/carddisp.pl?gene=CTNNB1">https://www.genecards.org/cgi-bin/carddisp.pl?gene=CTNNB1</a>   |
| AKR1C4  | Aldo-Keto Reductase Family 1 Member C4                                 | Protein Coding | 53 | GC10P005195 | 7.621516705 | <a href="https://www.genecards.org/cgi-bin/carddisp.pl?gene=SLC5A8">https://www.genecards.org/cgi-bin/carddisp.pl?gene=SLC5A8</a>   |
| ACP5    | Acid Phosphatase 5, Tartrate Resistant                                 | Protein Coding | 53 | GC19M011574 | 7.61563921  | <a href="https://www.genecards.org/cgi-bin/carddisp.pl?gene=AKR1C4">https://www.genecards.org/cgi-bin/carddisp.pl?gene=AKR1C4</a>   |
| CCND1   | Cyclin D1                                                              | Protein Coding | 60 | GC11P069641 | 7.614154339 | <a href="https://www.genecards.org/cgi-bin/carddisp.pl?gene=ACP5">https://www.genecards.org/cgi-bin/carddisp.pl?gene=ACP5</a>       |

|           |                                                    |                |    |             |             |  |                                                                                                                                         |
|-----------|----------------------------------------------------|----------------|----|-------------|-------------|--|-----------------------------------------------------------------------------------------------------------------------------------------|
|           |                                                    |                |    |             |             |  | ne=CCND1                                                                                                                                |
| KYAT1     | Kynurenine Aminotransferase 1                      | Protein Coding | 47 | GC09M128833 | 7.60359478  |  | <a href="https://www.genecards.org/cgi-bin/carddisp.pl?gene=KYAT1">https://www.genecards.org/cgi-bin/carddisp.pl?gene=KYAT1</a>         |
| NOS1      | Nitric Oxide Synthase 1                            | Protein Coding | 56 | GC12M117208 | 7.60078907  |  | <a href="https://www.genecards.org/cgi-bin/carddisp.pl?gene=NOS1">https://www.genecards.org/cgi-bin/carddisp.pl?gene=NOS1</a>           |
| SULT1A3   | Sulfotransferase Family 1A Member 3                | Protein Coding | 43 | GC16P030199 | 7.598351002 |  | <a href="https://www.genecards.org/cgi-bin/carddisp.pl?gene=SULT1A3">https://www.genecards.org/cgi-bin/carddisp.pl?gene=SULT1A3</a>     |
| CYCS      | Cytochrome C, Somatic                              | Protein Coding | 55 | GC07M025118 | 7.579985619 |  | <a href="https://www.genecards.org/cgi-bin/carddisp.pl?gene=CYCS">https://www.genecards.org/cgi-bin/carddisp.pl?gene=CYCS</a>           |
| ACLY      | ATP Citrate Lyase                                  | Protein Coding | 53 | GC17M041866 | 7.559963703 |  | <a href="https://www.genecards.org/cgi-bin/carddisp.pl?gene=ACLY">https://www.genecards.org/cgi-bin/carddisp.pl?gene=ACLY</a>           |
| CDKN3     | Cyclin Dependent Kinase Inhibitor 3                | Protein Coding | 48 | GC14P054398 | 7.558909893 |  | <a href="https://www.genecards.org/cgi-bin/carddisp.pl?gene=CDKN3">https://www.genecards.org/cgi-bin/carddisp.pl?gene=CDKN3</a>         |
| JAK2      | Janus Kinase 2                                     | Protein Coding | 60 | GC09P004985 | 7.554831028 |  | <a href="https://www.genecards.org/cgi-bin/carddisp.pl?gene=JAK2">https://www.genecards.org/cgi-bin/carddisp.pl?gene=JAK2</a>           |
| STAT3     | Signal Transducer And Activator Of Transcription 3 | Protein Coding | 61 | GC17M042313 | 7.553854942 |  | <a href="https://www.genecards.org/cgi-bin/carddisp.pl?gene=STAT3">https://www.genecards.org/cgi-bin/carddisp.pl?gene=STAT3</a>         |
| HCRT      | Hypocretin Neuropeptide Precursor                  | Protein Coding | 46 | GC17M051782 | 7.507509232 |  | <a href="https://www.genecards.org/cgi-bin/carddisp.pl?gene=HCRT">https://www.genecards.org/cgi-bin/carddisp.pl?gene=HCRT</a>           |
| SQSTM1    | Sequestosome 1                                     | Protein Coding | 55 | GC05P179806 | 7.495340824 |  | <a href="https://www.genecards.org/cgi-bin/carddisp.pl?gene=SQSTM1">https://www.genecards.org/cgi-bin/carddisp.pl?gene=SQSTM1</a>       |
| DBT       | Dihydroliipoamide Branched Chain Transacylase E2   | Protein Coding | 49 | GC01M100186 | 7.495174885 |  | <a href="https://www.genecards.org/cgi-bin/carddisp.pl?gene=DBT">https://www.genecards.org/cgi-bin/carddisp.pl?gene=DBT</a>             |
| TNFRSF11A | TNF Receptor Superfamily Member 11a                | Protein Coding | 54 | GC18P062325 | 7.492922783 |  | <a href="https://www.genecards.org/cgi-bin/carddisp.pl?gene=TNFRSF11A">https://www.genecards.org/cgi-bin/carddisp.pl?gene=TNFRSF11A</a> |
| PHYH      | Phytanoyl-CoA 2-Hydroxylase                        | Protein Coding | 52 | GC10M013277 | 7.48562479  |  | <a href="https://www.genecards.org/cgi-bin/carddisp.pl?gene=PHYH">https://www.genecards.org/cgi-bin/carddisp.pl?gene=PHYH</a>           |
| PYY       | Peptide YY                                         | Protein Coding | 49 | GC17M043952 | 7.484090805 |  | <a href="https://www.genecards.org/cgi-bin/carddisp.pl?gene=PYY">https://www.genecards.org/cgi-bin/carddisp.pl?gene=PYY</a>             |
| VLDLR     | Very Low Density Lipoprotein Receptor              | Protein Coding | 56 | GC09P002611 | 7.477643013 |  | <a href="https://www.genecards.org/cgi-bin/carddisp.pl?gene=VLDLR">https://www.genecards.org/cgi-bin/carddisp.pl?gene=VLDLR</a>         |

A

|         |                                                     |                |    |             |             |                                                                                                                                     |
|---------|-----------------------------------------------------|----------------|----|-------------|-------------|-------------------------------------------------------------------------------------------------------------------------------------|
| CSF2    | Colony Stimulating Factor 2                         | Protein Coding | 51 | GC05P132073 | 7.462800026 | <a href="https://www.genecards.org/cgi-bin/carddisp.pl?gene=VLDLR">https://www.genecards.org/cgi-bin/carddisp.pl?gene=VLDLR</a>     |
| FOXO1   | Forkhead Box O1                                     | Protein Coding | 56 | GC13M040555 | 7.41369772  | <a href="https://www.genecards.org/cgi-bin/carddisp.pl?gene=CSF2">https://www.genecards.org/cgi-bin/carddisp.pl?gene=CSF2</a>       |
| TTPA    | Alpha Tocopherol Transfer Protein                   | Protein Coding | 47 | GC08M063048 | 7.413542747 | <a href="https://www.genecards.org/cgi-bin/carddisp.pl?gene=FOXO1">https://www.genecards.org/cgi-bin/carddisp.pl?gene=FOXO1</a>     |
| LTC4S   | Leukotriene C4 Synthase                             | Protein Coding | 49 | GC05P179793 | 7.400671959 | <a href="https://www.genecards.org/cgi-bin/carddisp.pl?gene=TTPA">https://www.genecards.org/cgi-bin/carddisp.pl?gene=TTPA</a>       |
| GSTZ1   | Glutathione S-Transferase Zeta 1                    | Protein Coding | 48 | GC14P077320 | 7.394896507 | <a href="https://www.genecards.org/cgi-bin/carddisp.pl?gene=LTC4S">https://www.genecards.org/cgi-bin/carddisp.pl?gene=LTC4S</a>     |
| ACACB   | Acetyl-CoA Carboxylase Beta                         | Protein Coding | 52 | GC12P109116 | 7.383708    | <a href="https://www.genecards.org/cgi-bin/carddisp.pl?gene=GSTZ1">https://www.genecards.org/cgi-bin/carddisp.pl?gene=GSTZ1</a>     |
| CRYAA   | Crystallin Alpha A                                  | Protein Coding | 52 | GC21P043169 | 7.340756893 | <a href="https://www.genecards.org/cgi-bin/carddisp.pl?gene=ACACB">https://www.genecards.org/cgi-bin/carddisp.pl?gene=ACACB</a>     |
| SLC10A1 | Solute Carrier Family 10 Member 1                   | Protein Coding | 51 | GC14M069775 | 7.333871365 | <a href="https://www.genecards.org/cgi-bin/carddisp.pl?gene=CRYAA">https://www.genecards.org/cgi-bin/carddisp.pl?gene=CRYAA</a>     |
| OPLAH   | 5-Oxoprolinase, ATP-Hydrolysing                     | Protein Coding | 50 | GC08M144278 | 7.333218098 | <a href="https://www.genecards.org/cgi-bin/carddisp.pl?gene=SLC10A1">https://www.genecards.org/cgi-bin/carddisp.pl?gene=SLC10A1</a> |
| IGF2BP2 | Insulin Like Growth Factor 2 mRNA Binding Protein 2 | Protein Coding | 51 | GC03M185643 | 7.331263065 | <a href="https://www.genecards.org/cgi-bin/carddisp.pl?gene=OPLAH">https://www.genecards.org/cgi-bin/carddisp.pl?gene=OPLAH</a>     |
| CD320   | CD320 Molecule                                      | Protein Coding | 47 | GC19M008302 | 7.313445091 | <a href="https://www.genecards.org/cgi-bin/carddisp.pl?gene=IGF2BP2">https://www.genecards.org/cgi-bin/carddisp.pl?gene=IGF2BP2</a> |
| PTPN11  | Protein Tyrosine Phosphatase Non-Receptor Type 11   | Protein Coding | 61 | GC12P112418 | 7.310684204 | <a href="https://www.genecards.org/cgi-bin/carddisp.pl?gene=CD320">https://www.genecards.org/cgi-bin/carddisp.pl?gene=CD320</a>     |
| HLA-B   | Major Histocompatibility Complex, Class I, B        | Protein Coding | 52 | GC06M071682 | 7.308247089 | <a href="https://www.genecards.org/cgi-bin/carddisp.pl?gene=PTPN11">https://www.genecards.org/cgi-bin/carddisp.pl?gene=PTPN11</a>   |
| CCK     | Cholecystokinin                                     | Protein Coding | 48 | GC03M042274 | 7.304950714 | <a href="https://www.genecards.org/cgi-bin/carddisp.pl?gene=HLA-B">https://www.genecards.org/cgi-bin/carddisp.pl?gene=HLA-B</a>     |
| TBXAS1  | Thromboxane A Synthase 1                            | Protein Coding | 56 | GC07P139777 | 7.303420544 | <a href="https://www.genecards.org/cgi-bin/carddisp.pl?gene=CCK">https://www.genecards.org/cgi-bin/carddisp.pl?gene=CCK</a>         |
|         |                                                     |                |    |             |             | <a href="https://www.genecards.org/cgi-bin/carddisp.pl?gene=TBXAS1">https://www.genecards.org/cgi-bin/carddisp.pl?gene=TBXAS1</a>   |

|         |                                                            |                |    |             |             |                                                                                                                                     |
|---------|------------------------------------------------------------|----------------|----|-------------|-------------|-------------------------------------------------------------------------------------------------------------------------------------|
| ACY1    | Aminoacylase 1                                             | Protein Coding | 52 | GC03P051983 | 7.282396793 | <a href="https://www.genecards.org/cgi-bin/carddisp.pl?gene=TBXAS1">https://www.genecards.org/cgi-bin/carddisp.pl?gene=TBXAS1</a>   |
| CYP4V2  | Cytochrome P450 Family 4 Subfamily V Member 2              | Protein Coding | 48 | GC04P186191 | 7.213627338 | <a href="https://www.genecards.org/cgi-bin/carddisp.pl?gene=ACY1">https://www.genecards.org/cgi-bin/carddisp.pl?gene=ACY1</a>       |
| KCNJ5   | Potassium Inwardly Rectifying Channel Subfamily J Member 5 | Protein Coding | 53 | GC11P128891 | 7.193699837 | <a href="https://www.genecards.org/cgi-bin/carddisp.pl?gene=CYP4V2">https://www.genecards.org/cgi-bin/carddisp.pl?gene=CYP4V2</a>   |
| MIR29C  | MicroRNA 29c                                               | RNA Gene       | 21 | GC01M207811 | 7.183753967 | <a href="https://www.genecards.org/cgi-bin/carddisp.pl?gene=KCNJ5">https://www.genecards.org/cgi-bin/carddisp.pl?gene=KCNJ5</a>     |
| SLC2A3  | Solute Carrier Family 2 Member 3                           | Protein Coding | 55 | GC12M007919 | 7.150427818 | <a href="https://www.genecards.org/cgi-bin/carddisp.pl?gene=MIR29C">https://www.genecards.org/cgi-bin/carddisp.pl?gene=MIR29C</a>   |
| CBR1    | Carbonyl Reductase 1                                       | Protein Coding | 51 | GC21P036069 | 7.138096809 | <a href="https://www.genecards.org/cgi-bin/carddisp.pl?gene=SLC2A3">https://www.genecards.org/cgi-bin/carddisp.pl?gene=SLC2A3</a>   |
| IL2     | Interleukin 2                                              | Protein Coding | 53 | GC04M122451 | 7.137097359 | <a href="https://www.genecards.org/cgi-bin/carddisp.pl?gene=CBR1">https://www.genecards.org/cgi-bin/carddisp.pl?gene=CBR1</a>       |
| SLC6A3  | Solute Carrier Family 6 Member 3                           | Protein Coding | 57 | GC05M001392 | 7.135263443 | <a href="https://www.genecards.org/cgi-bin/carddisp.pl?gene=IL2">https://www.genecards.org/cgi-bin/carddisp.pl?gene=IL2</a>         |
| PLA2G1B | Phospholipase A2 Group IB                                  | Protein Coding | 51 | GC12M120322 | 7.106545925 | <a href="https://www.genecards.org/cgi-bin/carddisp.pl?gene=SLC6A3">https://www.genecards.org/cgi-bin/carddisp.pl?gene=SLC6A3</a>   |
| RORA    | RAR Related Orphan Receptor A                              | Protein Coding | 55 | GC15M060488 | 7.092875957 | <a href="https://www.genecards.org/cgi-bin/carddisp.pl?gene=PLA2G1B">https://www.genecards.org/cgi-bin/carddisp.pl?gene=PLA2G1B</a> |
| SULT2A1 | Sulfotransferase Family 2A Member 1                        | Protein Coding | 50 | GC19M047870 | 7.092458248 | <a href="https://www.genecards.org/cgi-bin/carddisp.pl?gene=RORA">https://www.genecards.org/cgi-bin/carddisp.pl?gene=RORA</a>       |
| IL13    | Interleukin 13                                             | Protein Coding | 50 | GC05P132656 | 7.088688374 | <a href="https://www.genecards.org/cgi-bin/carddisp.pl?gene=SULT2A1">https://www.genecards.org/cgi-bin/carddisp.pl?gene=SULT2A1</a> |
| PGK1    | Phosphoglycerate Kinase 1                                  | Protein Coding | 56 | GC0XP078032 | 7.080644131 | <a href="https://www.genecards.org/cgi-bin/carddisp.pl?gene=IL13">https://www.genecards.org/cgi-bin/carddisp.pl?gene=IL13</a>       |
| CD4     | CD4 Molecule                                               | Protein Coding | 57 | GC12P006786 | 7.079792976 | <a href="https://www.genecards.org/cgi-bin/carddisp.pl?gene=PGK1">https://www.genecards.org/cgi-bin/carddisp.pl?gene=PGK1</a>       |
| TYR     | Tyrosinase                                                 | Protein Coding | 55 | GC11P089177 | 7.075667381 | <a href="https://www.genecards.org/cgi-bin/carddisp.pl?gene=CD4">https://www.genecards.org/cgi-bin/carddisp.pl?gene=CD4</a>         |
|         |                                                            |                |    |             |             | <a href="https://www.genecards.org/cgi-bin/carddisp.pl?gene=TYR">https://www.genecards.org/cgi-bin/carddisp.pl?gene=TYR</a>         |

|         |                                                             |                |    |             |             |                                                                                                                                     |
|---------|-------------------------------------------------------------|----------------|----|-------------|-------------|-------------------------------------------------------------------------------------------------------------------------------------|
| FAAH    | Fatty Acid Amide Hydrolase                                  | Protein Coding | 54 | GC01P046394 | 7.074492455 | <a href="https://www.genecards.org/cgi-bin/carddisp.pl?gene=FAAH">https://www.genecards.org/cgi-bin/carddisp.pl?gene=FAAH</a>       |
| CCL5    | C-C Motif Chemokine Ligand 5                                | Protein Coding | 51 | GC17M035871 | 7.05864048  | <a href="https://www.genecards.org/cgi-bin/carddisp.pl?gene=CCL5">https://www.genecards.org/cgi-bin/carddisp.pl?gene=CCL5</a>       |
| HMBS    | Hydroxymethylbilane Synthase                                | Protein Coding | 51 | GC11P119084 | 7.051350594 | <a href="https://www.genecards.org/cgi-bin/carddisp.pl?gene=HMBS">https://www.genecards.org/cgi-bin/carddisp.pl?gene=HMBS</a>       |
| KCNJ10  | Potassium Inwardly Rectifying Channel Subfamily J Member 10 | Protein Coding | 52 | GC01M159998 | 7.050767422 | <a href="https://www.genecards.org/cgi-bin/carddisp.pl?gene=KCNJ10">https://www.genecards.org/cgi-bin/carddisp.pl?gene=KCNJ10</a>   |
| CACNA1S | Calcium Voltage-Gated Channel Subunit Alpha1 S              | Protein Coding | 55 | GC01M201008 | 7.044938564 | <a href="https://www.genecards.org/cgi-bin/carddisp.pl?gene=CACNA1S">https://www.genecards.org/cgi-bin/carddisp.pl?gene=CACNA1S</a> |
| EIF2AK3 | Eukaryotic Translation Initiation Factor 2 Alpha Kinase 3   | Protein Coding | 55 | GC02M088556 | 7.033459187 | <a href="https://www.genecards.org/cgi-bin/carddisp.pl?gene=EIF2AK3">https://www.genecards.org/cgi-bin/carddisp.pl?gene=EIF2AK3</a> |
| ACSL4   | Acyl-CoA Synthetase Long Chain Family Member 4              | Protein Coding | 52 | GC0XM109624 | 7.020869732 | <a href="https://www.genecards.org/cgi-bin/carddisp.pl?gene=ACSL4">https://www.genecards.org/cgi-bin/carddisp.pl?gene=ACSL4</a>     |
| PTS     | 6-Pyruvoyltetrahydropterin Synthase                         | Protein Coding | 51 | GC11P112226 | 6.987995625 | <a href="https://www.genecards.org/cgi-bin/carddisp.pl?gene=PTS">https://www.genecards.org/cgi-bin/carddisp.pl?gene=PTS</a>         |
| ACTB    | Actin Beta                                                  | Protein Coding | 56 | GC07M005527 | 6.978267193 | <a href="https://www.genecards.org/cgi-bin/carddisp.pl?gene=ACTB">https://www.genecards.org/cgi-bin/carddisp.pl?gene=ACTB</a>       |
| FBP2    | Fructose-Bisphosphatase 2                                   | Protein Coding | 50 | GC09M094558 | 6.97452116  | <a href="https://www.genecards.org/cgi-bin/carddisp.pl?gene=FBP2">https://www.genecards.org/cgi-bin/carddisp.pl?gene=FBP2</a>       |
| SULT1A2 | Sulfotransferase Family 1A Member 2                         | Protein Coding | 48 | GC16M028591 | 6.969522476 | <a href="https://www.genecards.org/cgi-bin/carddisp.pl?gene=SULT1A2">https://www.genecards.org/cgi-bin/carddisp.pl?gene=SULT1A2</a> |
| FXN     | Frataxin                                                    | Protein Coding | 52 | GC09P069035 | 6.963536739 | <a href="https://www.genecards.org/cgi-bin/carddisp.pl?gene=FXN">https://www.genecards.org/cgi-bin/carddisp.pl?gene=FXN</a>         |
| FGFR3   | Fibroblast Growth Factor Receptor 3                         | Protein Coding | 63 | GC04P001795 | 6.953905582 | <a href="https://www.genecards.org/cgi-bin/carddisp.pl?gene=FGFR3">https://www.genecards.org/cgi-bin/carddisp.pl?gene=FGFR3</a>     |
| ALAS2   | 5'-Aminolevulinate Synthase 2                               | Protein Coding | 51 | GC0XM055009 | 6.94052887  | <a href="https://www.genecards.org/cgi-bin/carddisp.pl?gene=ALAS2">https://www.genecards.org/cgi-bin/carddisp.pl?gene=ALAS2</a>     |
| SULT1E1 | Sulfotransferase Family 1E Member 1                         | Protein Coding | 50 | GC04M069823 | 6.935936451 | <a href="https://www.genecards.org/cgi-bin/carddisp.pl?gene=SULT1E1">https://www.genecards.org/cgi-bin/carddisp.pl?gene=SULT1E1</a> |

|          |                                                                        |                |    |             |             |                                                                                                                                       |
|----------|------------------------------------------------------------------------|----------------|----|-------------|-------------|---------------------------------------------------------------------------------------------------------------------------------------|
| GOT1     | Glutamic-Oxaloacetic Transaminase 1                                    | Protein Coding | 52 | GC10M099396 | 6.932769299 | <a href="https://www.genecards.org/cgi-bin/carddisp.pl?gene=SULT1E1">https://www.genecards.org/cgi-bin/carddisp.pl?gene=SULT1E1</a>   |
| FTCD-AS1 | FTCD Antisense RNA 1                                                   | RNA Gene       | 18 | GC21P046151 | 6.917957783 | <a href="https://www.genecards.org/cgi-bin/carddisp.pl?gene=GOT1">https://www.genecards.org/cgi-bin/carddisp.pl?gene=GOT1</a>         |
| PARP1    | Poly(ADP-Ribose) Polymerase 1                                          | Protein Coding | 58 | GC01M226360 | 6.91354847  | <a href="https://www.genecards.org/cgi-bin/carddisp.pl?gene=FTCD-AS1">https://www.genecards.org/cgi-bin/carddisp.pl?gene=FTCD-AS1</a> |
| TARDBP   | TAR DNA Binding Protein                                                | Protein Coding | 53 | GC01P011013 | 6.906384468 | <a href="https://www.genecards.org/cgi-bin/carddisp.pl?gene=PARP1">https://www.genecards.org/cgi-bin/carddisp.pl?gene=PARP1</a>       |
| IL1A     | Interleukin 1 Alpha                                                    | Protein Coding | 52 | GC02M112773 | 6.887263298 | <a href="https://www.genecards.org/cgi-bin/carddisp.pl?gene=TARDBP">https://www.genecards.org/cgi-bin/carddisp.pl?gene=TARDBP</a>     |
| HPGD     | 15-Hydroxyprostaglandin Dehydrogenase                                  | Protein Coding | 53 | GC04M174490 | 6.878279209 | <a href="https://www.genecards.org/cgi-bin/carddisp.pl?gene=IL1A">https://www.genecards.org/cgi-bin/carddisp.pl?gene=IL1A</a>         |
| CCR6     | C-C Motif Chemokine Receptor 6                                         | Protein Coding | 51 | GC06P167111 | 6.876591682 | <a href="https://www.genecards.org/cgi-bin/carddisp.pl?gene=HPGD">https://www.genecards.org/cgi-bin/carddisp.pl?gene=HPGD</a>         |
| CSN1S1   | Casein Alpha S1                                                        | Protein Coding | 43 | GC04P069932 | 6.874129295 | <a href="https://www.genecards.org/cgi-bin/carddisp.pl?gene=CCR6">https://www.genecards.org/cgi-bin/carddisp.pl?gene=CCR6</a>         |
| APOC1    | Apolipoprotein C1                                                      | Protein Coding | 46 | GC19P044914 | 6.873025417 | <a href="https://www.genecards.org/cgi-bin/carddisp.pl?gene=CSN1S1">https://www.genecards.org/cgi-bin/carddisp.pl?gene=CSN1S1</a>     |
| IDO1     | Indoleamine 2,3-Dioxygenase 1                                          | Protein Coding | 53 | GC08P039891 | 6.860894203 | <a href="https://www.genecards.org/cgi-bin/carddisp.pl?gene=APOC1">https://www.genecards.org/cgi-bin/carddisp.pl?gene=APOC1</a>       |
| FOS      | Fos Proto-Oncogene, AP-1 Transcription Factor Subunit                  | Protein Coding | 57 | GC14P075278 | 6.856826782 | <a href="https://www.genecards.org/cgi-bin/carddisp.pl?gene=IDO1">https://www.genecards.org/cgi-bin/carddisp.pl?gene=IDO1</a>         |
| PIK3CG   | Phosphatidylinositol-4,5-Bisphosphate 3-Kinase Catalytic Subunit Gamma | Protein Coding | 55 | GC07P106865 | 6.855944633 | <a href="https://www.genecards.org/cgi-bin/carddisp.pl?gene=FOS">https://www.genecards.org/cgi-bin/carddisp.pl?gene=FOS</a>           |
| ADORA2A  | Adenosine A2a Receptor                                                 | Protein Coding | 53 | GC22P024417 | 6.848574162 | <a href="https://www.genecards.org/cgi-bin/carddisp.pl?gene=PIK3CG">https://www.genecards.org/cgi-bin/carddisp.pl?gene=PIK3CG</a>     |
| MAPK14   | Mitogen-Activated Protein Kinase 14                                    | Protein Coding | 58 | GC06P092286 | 6.802408218 | <a href="https://www.genecards.org/cgi-bin/carddisp.pl?gene=ADORA2A">https://www.genecards.org/cgi-bin/carddisp.pl?gene=ADORA2A</a>   |
| GUCY2C   | Guanylate Cyclase 2C                                                   | Protein Coding | 52 | GC12M014612 | 6.80224371  | <a href="https://www.genecards.org/cgi-bin/carddisp.pl?gene=MAPK14">https://www.genecards.org/cgi-bin/carddisp.pl?gene=MAPK14</a>     |
|          |                                                                        |                |    |             |             | <a href="https://www.genecards.org/cgi-bin/carddisp.pl?gene=GUCY2C">https://www.genecards.org/cgi-bin/carddisp.pl?gene=GUCY2C</a>     |

|        |                                               |                |    |             |             |                                                                                                                                   |
|--------|-----------------------------------------------|----------------|----|-------------|-------------|-----------------------------------------------------------------------------------------------------------------------------------|
| MAPK10 | Mitogen-Activated Protein Kinase 10           | Protein Coding | 56 | GC04M085990 | 6.799727917 | <a href="https://www.genecards.org/cgi-bin/carddisp.pl?gene=MAPK10">https://www.genecards.org/cgi-bin/carddisp.pl?gene=MAPK10</a> |
| AGT    | Angiotensinogen                               | Protein Coding | 56 | GC01M230690 | 6.794569969 | <a href="https://www.genecards.org/cgi-bin/carddisp.pl?gene=AGT">https://www.genecards.org/cgi-bin/carddisp.pl?gene=AGT</a>       |
| IL18   | Interleukin 18                                | Protein Coding | 50 | GC11M112143 | 6.792854786 | <a href="https://www.genecards.org/cgi-bin/carddisp.pl?gene=IL18">https://www.genecards.org/cgi-bin/carddisp.pl?gene=IL18</a>     |
| BPGM   | Bisphosphoglycerate Mutase                    | Protein Coding | 52 | GC07P134646 | 6.783220291 | <a href="https://www.genecards.org/cgi-bin/carddisp.pl?gene=BPGM">https://www.genecards.org/cgi-bin/carddisp.pl?gene=BPGM</a>     |
| SLPI   | Secretory Leukocyte Peptidase Inhibitor       | Protein Coding | 47 | GC20M045252 | 6.7794981   | <a href="https://www.genecards.org/cgi-bin/carddisp.pl?gene=SLPI">https://www.genecards.org/cgi-bin/carddisp.pl?gene=SLPI</a>     |
| LIAS   | Lipoic Acid Synthetase                        | Protein Coding | 48 | GC04P039499 | 6.778037071 | <a href="https://www.genecards.org/cgi-bin/carddisp.pl?gene=LIAS">https://www.genecards.org/cgi-bin/carddisp.pl?gene=LIAS</a>     |
| AMT    | Aminomethyltransferase                        | Protein Coding | 51 | GC03M051568 | 6.773910046 | <a href="https://www.genecards.org/cgi-bin/carddisp.pl?gene=AMT">https://www.genecards.org/cgi-bin/carddisp.pl?gene=AMT</a>       |
| GPI    | Glucose-6-Phosphate Isomerase                 | Protein Coding | 55 | GC19P034359 | 6.765838146 | <a href="https://www.genecards.org/cgi-bin/carddisp.pl?gene=GPI">https://www.genecards.org/cgi-bin/carddisp.pl?gene=GPI</a>       |
| MAPK8  | Mitogen-Activated Protein Kinase 8            | Protein Coding | 57 | GC10P048306 | 6.759390831 | <a href="https://www.genecards.org/cgi-bin/carddisp.pl?gene=MAPK8">https://www.genecards.org/cgi-bin/carddisp.pl?gene=MAPK8</a>   |
| BRAF   | B-Raf Proto-Oncogene, Serine/Threonine Kinase | Protein Coding | 60 | GC07M140742 | 6.748792171 | <a href="https://www.genecards.org/cgi-bin/carddisp.pl?gene=BRAF">https://www.genecards.org/cgi-bin/carddisp.pl?gene=BRAF</a>     |
| YARS2  | Tyrosyl-TRNA Synthetase 2                     | Protein Coding | 51 | GC12M032819 | 6.745001793 | <a href="https://www.genecards.org/cgi-bin/carddisp.pl?gene=YARS2">https://www.genecards.org/cgi-bin/carddisp.pl?gene=YARS2</a>   |
| RNASE3 | Ribonuclease A Family Member 3                | Protein Coding | 46 | GC14P020891 | 6.725999355 | <a href="https://www.genecards.org/cgi-bin/carddisp.pl?gene=RNASE3">https://www.genecards.org/cgi-bin/carddisp.pl?gene=RNASE3</a> |
| GSK3B  | Glycogen Synthase Kinase 3 Beta               | Protein Coding | 57 | GC03M119821 | 6.701512337 | <a href="https://www.genecards.org/cgi-bin/carddisp.pl?gene=GSK3B">https://www.genecards.org/cgi-bin/carddisp.pl?gene=GSK3B</a>   |
| BMP2   | Bone Morphogenetic Protein 2                  | Protein Coding | 53 | GC20P006767 | 6.691226959 | <a href="https://www.genecards.org/cgi-bin/carddisp.pl?gene=BMP2">https://www.genecards.org/cgi-bin/carddisp.pl?gene=BMP2</a>     |
| MMP3   | Matrix Metallopeptidase 3                     | Protein Coding | 57 | GC11M102835 | 6.690543175 | <a href="https://www.genecards.org/cgi-bin/carddisp.pl?gene=MMP3">https://www.genecards.org/cgi-bin/carddisp.pl?gene=MMP3</a>     |

|         |                                                            |                |    |             |             |                                                                                                                                     |
|---------|------------------------------------------------------------|----------------|----|-------------|-------------|-------------------------------------------------------------------------------------------------------------------------------------|
| FABP1   | Fatty Acid Binding Protein 1                               | Protein Coding | 49 | GC02M088122 | 6.688127518 | <a href="https://www.genecards.org/cgi-bin/carddisp.pl?gene=FABP1">https://www.genecards.org/cgi-bin/carddisp.pl?gene=FABP1</a>     |
| ALDH3A1 | Aldehyde Dehydrogenase 3 Family Member A1                  | Protein Coding | 52 | GC17M019737 | 6.668470383 | <a href="https://www.genecards.org/cgi-bin/carddisp.pl?gene=ALDH3A1">https://www.genecards.org/cgi-bin/carddisp.pl?gene=ALDH3A1</a> |
| HSPG2   | Heparan Sulfate Proteoglycan 2                             | Protein Coding | 54 | GC01M021822 | 6.655029297 | <a href="https://www.genecards.org/cgi-bin/carddisp.pl?gene=HSPG2">https://www.genecards.org/cgi-bin/carddisp.pl?gene=HSPG2</a>     |
| MMP2    | Matrix Metalloproteinase 2                                 | Protein Coding | 60 | GC16P055390 | 6.633100986 | <a href="https://www.genecards.org/cgi-bin/carddisp.pl?gene=MMP2">https://www.genecards.org/cgi-bin/carddisp.pl?gene=MMP2</a>       |
| ERCC1   | ERCC Excision Repair 1, Endonuclease Non-Catalytic Subunit | Protein Coding | 52 | GC19M070729 | 6.630684376 | <a href="https://www.genecards.org/cgi-bin/carddisp.pl?gene=ERCC1">https://www.genecards.org/cgi-bin/carddisp.pl?gene=ERCC1</a>     |
| CD38    | CD38 Molecule                                              | Protein Coding | 53 | GC04P019223 | 6.6181674   | <a href="https://www.genecards.org/cgi-bin/carddisp.pl?gene=CD38">https://www.genecards.org/cgi-bin/carddisp.pl?gene=CD38</a>       |
| TIMP1   | TIMP Metalloproteinase Inhibitor 1                         | Protein Coding | 52 | GC0XP047711 | 6.613132477 | <a href="https://www.genecards.org/cgi-bin/carddisp.pl?gene=TIMP1">https://www.genecards.org/cgi-bin/carddisp.pl?gene=TIMP1</a>     |
| GMPS    | Guanine Monophosphate Synthase                             | Protein Coding | 51 | GC03P155870 | 6.612122536 | <a href="https://www.genecards.org/cgi-bin/carddisp.pl?gene=GMPS">https://www.genecards.org/cgi-bin/carddisp.pl?gene=GMPS</a>       |
| INPPL1  | Inositol Polyphosphate Phosphatase Like 1                  | Protein Coding | 55 | GC11P072223 | 6.6092906   | <a href="https://www.genecards.org/cgi-bin/carddisp.pl?gene=INPPL1">https://www.genecards.org/cgi-bin/carddisp.pl?gene=INPPL1</a>   |
| TSC2    | TSC Complex Subunit 2                                      | Protein Coding | 56 | GC16P013513 | 6.607493401 | <a href="https://www.genecards.org/cgi-bin/carddisp.pl?gene=TSC2">https://www.genecards.org/cgi-bin/carddisp.pl?gene=TSC2</a>       |
| STS     | Steroid Sulfatase                                          | Protein Coding | 52 | GC0XP007146 | 6.60575819  | <a href="https://www.genecards.org/cgi-bin/carddisp.pl?gene=STS">https://www.genecards.org/cgi-bin/carddisp.pl?gene=STS</a>         |
| PAX4    | Paired Box 4                                               | Protein Coding | 47 | GC07M127610 | 6.605308533 | <a href="https://www.genecards.org/cgi-bin/carddisp.pl?gene=PAX4">https://www.genecards.org/cgi-bin/carddisp.pl?gene=PAX4</a>       |
| ALDH1A2 | Aldehyde Dehydrogenase 1 Family Member A2                  | Protein Coding | 55 | GC15M121963 | 6.603302479 | <a href="https://www.genecards.org/cgi-bin/carddisp.pl?gene=ALDH1A2">https://www.genecards.org/cgi-bin/carddisp.pl?gene=ALDH1A2</a> |
| PTH1LH  | Parathyroid Hormone Like Hormone                           | Protein Coding | 52 | GC12M027959 | 6.598110199 | <a href="https://www.genecards.org/cgi-bin/carddisp.pl?gene=PTH1LH">https://www.genecards.org/cgi-bin/carddisp.pl?gene=PTH1LH</a>   |
| BAAT    | Bile Acid-CoA:Amino Acid N-Acyltransferase                 | Protein Coding | 50 | GC09M101354 | 6.590001106 | <a href="https://www.genecards.org/cgi-bin/carddisp.pl?gene=BAAT">https://www.genecards.org/cgi-bin/carddisp.pl?gene=BAAT</a>       |

|         |                                                    |                |    |             |             |                                                                                                                                     |
|---------|----------------------------------------------------|----------------|----|-------------|-------------|-------------------------------------------------------------------------------------------------------------------------------------|
| CHKA    | Choline Kinase Alpha                               | Protein Coding | 49 | GC11M068052 | 6.575095654 | <a href="https://www.genecards.org/cgi-bin/carddisp.pl?gene=BAAT">https://www.genecards.org/cgi-bin/carddisp.pl?gene=BAAT</a>       |
| ELN     | Elastin                                            | Protein Coding | 50 | GC07P074027 | 6.564837456 | <a href="https://www.genecards.org/cgi-bin/carddisp.pl?gene=CHKA">https://www.genecards.org/cgi-bin/carddisp.pl?gene=CHKA</a>       |
| WDR72   | WD Repeat Domain 72                                | Protein Coding | 43 | GC15M125660 | 6.55697155  | <a href="https://www.genecards.org/cgi-bin/carddisp.pl?gene=ELN">https://www.genecards.org/cgi-bin/carddisp.pl?gene=ELN</a>         |
| HTT     | Huntingtin                                         | Protein Coding | 51 | GC04P003041 | 6.549586296 | <a href="https://www.genecards.org/cgi-bin/carddisp.pl?gene=WDR72">https://www.genecards.org/cgi-bin/carddisp.pl?gene=WDR72</a>     |
| STAT1   | Signal Transducer And Activator Of Transcription 1 | Protein Coding | 60 | GC02M190908 | 6.545604706 | <a href="https://www.genecards.org/cgi-bin/carddisp.pl?gene=HTT">https://www.genecards.org/cgi-bin/carddisp.pl?gene=HTT</a>         |
| ALOX15  | Arachidonate 15-Lipoxygenase                       | Protein Coding | 52 | GC17M004630 | 6.537812233 | <a href="https://www.genecards.org/cgi-bin/carddisp.pl?gene=STAT1">https://www.genecards.org/cgi-bin/carddisp.pl?gene=STAT1</a>     |
| FFAR4   | Free Fatty Acid Receptor 4                         | Protein Coding | 47 | GC10P093566 | 6.531475067 | <a href="https://www.genecards.org/cgi-bin/carddisp.pl?gene=ALOX15">https://www.genecards.org/cgi-bin/carddisp.pl?gene=ALOX15</a>   |
| CSF1    | Colony Stimulating Factor 1                        | Protein Coding | 51 | GC01P109911 | 6.528945923 | <a href="https://www.genecards.org/cgi-bin/carddisp.pl?gene=FFAR4">https://www.genecards.org/cgi-bin/carddisp.pl?gene=FFAR4</a>     |
| PRKN    | Parkin RBR E3 Ubiquitin Protein Ligase             | Protein Coding | 53 | GC06M161348 | 6.517373085 | <a href="https://www.genecards.org/cgi-bin/carddisp.pl?gene=CSF1">https://www.genecards.org/cgi-bin/carddisp.pl?gene=CSF1</a>       |
| SOAT2   | Sterol O-Acyltransferase 2                         | Protein Coding | 50 | GC12P053103 | 6.513618469 | <a href="https://www.genecards.org/cgi-bin/carddisp.pl?gene=PRKN">https://www.genecards.org/cgi-bin/carddisp.pl?gene=PRKN</a>       |
| NTS     | Neurotensin                                        | Protein Coding | 48 | GC12P085876 | 6.508972645 | <a href="https://www.genecards.org/cgi-bin/carddisp.pl?gene=SOAT2">https://www.genecards.org/cgi-bin/carddisp.pl?gene=SOAT2</a>     |
| HSD17B1 | Hydroxysteroid 17-Beta Dehydrogenase 1             | Protein Coding | 48 | GC17P061989 | 6.502941608 | <a href="https://www.genecards.org/cgi-bin/carddisp.pl?gene=NTS">https://www.genecards.org/cgi-bin/carddisp.pl?gene=NTS</a>         |
| KNG1    | Kininogen 1                                        | Protein Coding | 55 | GC03P186717 | 6.496859074 | <a href="https://www.genecards.org/cgi-bin/carddisp.pl?gene=HSD17B1">https://www.genecards.org/cgi-bin/carddisp.pl?gene=HSD17B1</a> |
| HBA1    | Hemoglobin Subunit Alpha 1                         | Protein Coding | 49 | GC16P013428 | 6.478796959 | <a href="https://www.genecards.org/cgi-bin/carddisp.pl?gene=KNG1">https://www.genecards.org/cgi-bin/carddisp.pl?gene=KNG1</a>       |
| ESR2    | Estrogen Receptor 2                                | Protein Coding | 56 | GC14M064084 | 6.464812279 | <a href="https://www.genecards.org/cgi-bin/carddisp.pl?gene=HBA1">https://www.genecards.org/cgi-bin/carddisp.pl?gene=HBA1</a>       |
|         |                                                    |                |    |             |             | <a href="https://www.genecards.org/cgi-bin/carddisp.pl?gene=ESR2">https://www.genecards.org/cgi-bin/carddisp.pl?gene=ESR2</a>       |

|         |                                                     |                |    |             |             |                                                                                                                                     |
|---------|-----------------------------------------------------|----------------|----|-------------|-------------|-------------------------------------------------------------------------------------------------------------------------------------|
| ERBB2   | Erb-B2 Receptor Tyrosine Kinase 2                   | Protein Coding | 62 | GC17P039687 | 6.462425709 | <a href="https://www.genecards.org/cgi-bin/carddisp.pl?gene=ERBB2">https://www.genecards.org/cgi-bin/carddisp.pl?gene=ERBB2</a>     |
| HP      | Haptoglobin                                         | Protein Coding | 52 | GC16P072372 | 6.458934307 | <a href="https://www.genecards.org/cgi-bin/carddisp.pl?gene=HP">https://www.genecards.org/cgi-bin/carddisp.pl?gene=HP</a>           |
| PTGIS   | Prostaglandin I2 Synthase                           | Protein Coding | 52 | GC20M049503 | 6.456087112 | <a href="https://www.genecards.org/cgi-bin/carddisp.pl?gene=PTGIS">https://www.genecards.org/cgi-bin/carddisp.pl?gene=PTGIS</a>     |
| ATF4    | Activating Transcription Factor 4                   | Protein Coding | 52 | GC22P039519 | 6.442789555 | <a href="https://www.genecards.org/cgi-bin/carddisp.pl?gene=ATF4">https://www.genecards.org/cgi-bin/carddisp.pl?gene=ATF4</a>       |
| THBD    | Thrombomodulin                                      | Protein Coding | 53 | GC20M023026 | 6.435276985 | <a href="https://www.genecards.org/cgi-bin/carddisp.pl?gene=THBD">https://www.genecards.org/cgi-bin/carddisp.pl?gene=THBD</a>       |
| DIO2    | Iodothyronine Deiodinase 2                          | Protein Coding | 46 | GC14M080197 | 6.413453579 | <a href="https://www.genecards.org/cgi-bin/carddisp.pl?gene=DIO2">https://www.genecards.org/cgi-bin/carddisp.pl?gene=DIO2</a>       |
| PDK1    | Pyruvate Dehydrogenase Kinase 1                     | Protein Coding | 53 | GC02P172555 | 6.402394295 | <a href="https://www.genecards.org/cgi-bin/carddisp.pl?gene=PDK1">https://www.genecards.org/cgi-bin/carddisp.pl?gene=PDK1</a>       |
| IFNB1   | Interferon Beta 1                                   | Protein Coding | 50 | GC09M021077 | 6.401349068 | <a href="https://www.genecards.org/cgi-bin/carddisp.pl?gene=IFNB1">https://www.genecards.org/cgi-bin/carddisp.pl?gene=IFNB1</a>     |
| LRP1    | LDL Receptor Related Protein 1                      | Protein Coding | 53 | GC12P057128 | 6.399954319 | <a href="https://www.genecards.org/cgi-bin/carddisp.pl?gene=LRP1">https://www.genecards.org/cgi-bin/carddisp.pl?gene=LRP1</a>       |
| VCP     | Valosin Containing Protein                          | Protein Coding | 57 | GC09M035056 | 6.39056921  | <a href="https://www.genecards.org/cgi-bin/carddisp.pl?gene=VCP">https://www.genecards.org/cgi-bin/carddisp.pl?gene=VCP</a>         |
| MOGS    | Mannosyl-Oligosaccharide Glucosidase                | Protein Coding | 50 | GC02M074461 | 6.386434078 | <a href="https://www.genecards.org/cgi-bin/carddisp.pl?gene=MOGS">https://www.genecards.org/cgi-bin/carddisp.pl?gene=MOGS</a>       |
| MIR3944 | MicroRNA 3944                                       | RNA Gene       | 15 | GC10M133371 | 6.384291649 | <a href="https://www.genecards.org/cgi-bin/carddisp.pl?gene=MIR3944">https://www.genecards.org/cgi-bin/carddisp.pl?gene=MIR3944</a> |
| GPAM    | Glycerol-3-Phosphate Acyltransferase, Mitochondrial | Protein Coding | 50 | GC10M112148 | 6.383892059 | <a href="https://www.genecards.org/cgi-bin/carddisp.pl?gene=GPAM">https://www.genecards.org/cgi-bin/carddisp.pl?gene=GPAM</a>       |
| PPT1    | Palmitoyl-Protein Thioesterase 1                    | Protein Coding | 53 | GC01M040103 | 6.374232292 | <a href="https://www.genecards.org/cgi-bin/carddisp.pl?gene=PPT1">https://www.genecards.org/cgi-bin/carddisp.pl?gene=PPT1</a>       |
| CTSD    | Cathepsin D                                         | Protein Coding | 59 | GC11M001752 | 6.372982979 | <a href="https://www.genecards.org/cgi-bin/carddisp.pl?gene=CTSD">https://www.genecards.org/cgi-bin/carddisp.pl?gene=CTSD</a>       |

|         |                                                    |                |    |             |             |                                                                                                                                     |
|---------|----------------------------------------------------|----------------|----|-------------|-------------|-------------------------------------------------------------------------------------------------------------------------------------|
| HRAS    | HRas Proto-Oncogene, GTPase                        | Protein Coding | 59 | GC11M004421 | 6.359884739 | <a href="https://www.genecards.org/cgi-bin/carddisp.pl?gene=CTSD">https://www.genecards.org/cgi-bin/carddisp.pl?gene=CTSD</a>       |
| PLAT    | Plasminogen Activator, Tissue Type                 | Protein Coding | 57 | GC08M042174 | 6.354998589 | <a href="https://www.genecards.org/cgi-bin/carddisp.pl?gene=HRAS">https://www.genecards.org/cgi-bin/carddisp.pl?gene=HRAS</a>       |
| GRIA3   | Glutamate Ionotropic Receptor AMPA Type Subunit 3  | Protein Coding | 58 | GC0XP123184 | 6.331629753 | <a href="https://www.genecards.org/cgi-bin/carddisp.pl?gene=PLAT">https://www.genecards.org/cgi-bin/carddisp.pl?gene=PLAT</a>       |
| AVP     | Arginine Vasopressin                               | Protein Coding | 51 | GC20M003082 | 6.322710514 | <a href="https://www.genecards.org/cgi-bin/carddisp.pl?gene=GRIA3">https://www.genecards.org/cgi-bin/carddisp.pl?gene=GRIA3</a>     |
| EGFR    | Epidermal Growth Factor Receptor                   | Protein Coding | 62 | GC07P055019 | 6.309800625 | <a href="https://www.genecards.org/cgi-bin/carddisp.pl?gene=AVP">https://www.genecards.org/cgi-bin/carddisp.pl?gene=AVP</a>         |
| PLG     | Plasminogen                                        | Protein Coding | 56 | GC06P160702 | 6.293350697 | <a href="https://www.genecards.org/cgi-bin/carddisp.pl?gene=EGFR">https://www.genecards.org/cgi-bin/carddisp.pl?gene=EGFR</a>       |
| ACHE    | Acetylcholinesterase (Cartwright Blood Group)      | Protein Coding | 53 | GC07M100889 | 6.264330864 | <a href="https://www.genecards.org/cgi-bin/carddisp.pl?gene=PLG">https://www.genecards.org/cgi-bin/carddisp.pl?gene=PLG</a>         |
| CASP3   | Caspase 3                                          | Protein Coding | 57 | GC04M184627 | 6.237726212 | <a href="https://www.genecards.org/cgi-bin/carddisp.pl?gene=ACHE">https://www.genecards.org/cgi-bin/carddisp.pl?gene=ACHE</a>       |
| ST3GAL4 | ST3 Beta-Galactoside Alpha-2,3-Sialyltransferase 4 | Protein Coding | 50 | GC11P126355 | 6.23571682  | <a href="https://www.genecards.org/cgi-bin/carddisp.pl?gene=CASP3">https://www.genecards.org/cgi-bin/carddisp.pl?gene=CASP3</a>     |
| SLC30A8 | Solute Carrier Family 30 Member 8                  | Protein Coding | 48 | GC08P116950 | 6.219080925 | <a href="https://www.genecards.org/cgi-bin/carddisp.pl?gene=ST3GAL4">https://www.genecards.org/cgi-bin/carddisp.pl?gene=ST3GAL4</a> |
| DLAT    | Dihydroliipoamide S-Acetyltransferase              | Protein Coding | 53 | GC11P112026 | 6.217043877 | <a href="https://www.genecards.org/cgi-bin/carddisp.pl?gene=SLC30A8">https://www.genecards.org/cgi-bin/carddisp.pl?gene=SLC30A8</a> |
| PDGFRB  | Platelet Derived Growth Factor Receptor Beta       | Protein Coding | 60 | GC05M150113 | 6.213683605 | <a href="https://www.genecards.org/cgi-bin/carddisp.pl?gene=DLAT">https://www.genecards.org/cgi-bin/carddisp.pl?gene=DLAT</a>       |
| GYG1    | Glycogenin 1                                       | Protein Coding | 53 | GC03P148991 | 6.206664085 | <a href="https://www.genecards.org/cgi-bin/carddisp.pl?gene=PDGFRB">https://www.genecards.org/cgi-bin/carddisp.pl?gene=PDGFRB</a>   |
| GPHN    | Gephyrin                                           | Protein Coding | 55 | GC14P066507 | 6.201871395 | <a href="https://www.genecards.org/cgi-bin/carddisp.pl?gene=GYG1">https://www.genecards.org/cgi-bin/carddisp.pl?gene=GYG1</a>       |
| ALDH3B1 | Aldehyde Dehydrogenase 3 Family Member B1          | Protein Coding | 47 | GC11P071077 | 6.159162521 | <a href="https://www.genecards.org/cgi-bin/carddisp.pl?gene=GPHN">https://www.genecards.org/cgi-bin/carddisp.pl?gene=GPHN</a>       |
|         |                                                    |                |    |             |             | <a href="https://www.genecards.org/cgi-bin/carddisp.pl?gene=ALDH3B1">https://www.genecards.org/cgi-bin/carddisp.pl?gene=ALDH3B1</a> |

|         |                                                                              |                |    |             |             |                                                                                                                                                 |
|---------|------------------------------------------------------------------------------|----------------|----|-------------|-------------|-------------------------------------------------------------------------------------------------------------------------------------------------|
| PIEZO2  | Piezo Type Mechanosensitive Ion Channel Component 2                          | Protein Coding | 43 | GC18M010670 | 6.156918049 | ne=ALDH3B1<br><a href="https://www.genecards.org/cgi-bin/carddisp.pl?gene=PIEZO2">https://www.genecards.org/cgi-bin/carddisp.pl?gene=PIEZO2</a> |
| HTR1A   | 5-Hydroxytryptamine Receptor 1A                                              | Protein Coding | 53 | GC05M063960 | 6.154148102 | <a href="https://www.genecards.org/cgi-bin/carddisp.pl?gene=HTR1A">https://www.genecards.org/cgi-bin/carddisp.pl?gene=HTR1A</a>                 |
| UGT2B17 | UDP Glucuronosyltransferase Family 2 Member B17                              | Protein Coding | 47 | GC04M068537 | 6.152544975 | <a href="https://www.genecards.org/cgi-bin/carddisp.pl?gene=UGT2B17">https://www.genecards.org/cgi-bin/carddisp.pl?gene=UGT2B17</a>             |
| RUNX2   | RUNX Family Transcription Factor 2                                           | Protein Coding | 53 | GC06P092371 | 6.151573658 | <a href="https://www.genecards.org/cgi-bin/carddisp.pl?gene=RUNX2">https://www.genecards.org/cgi-bin/carddisp.pl?gene=RUNX2</a>                 |
| ALOX5AP | Arachidonate 5-Lipoxygenase Activating Protein                               | Protein Coding | 51 | GC13P030713 | 6.141064167 | <a href="https://www.genecards.org/cgi-bin/carddisp.pl?gene=ALOX5AP">https://www.genecards.org/cgi-bin/carddisp.pl?gene=ALOX5AP</a>             |
| PHGDH   | Phosphoglycerate Dehydrogenase                                               | Protein Coding | 57 | GC01P119660 | 6.127547741 | <a href="https://www.genecards.org/cgi-bin/carddisp.pl?gene=PHGDH">https://www.genecards.org/cgi-bin/carddisp.pl?gene=PHGDH</a>                 |
| WWOX    | WW Domain Containing Oxidoreductase                                          | Protein Coding | 52 | GC16P078099 | 6.116097927 | <a href="https://www.genecards.org/cgi-bin/carddisp.pl?gene=WWOX">https://www.genecards.org/cgi-bin/carddisp.pl?gene=WWOX</a>                   |
| ALDH1A3 | Aldehyde Dehydrogenase 1 Family Member A3                                    | Protein Coding | 52 | GC15P100877 | 6.111147881 | <a href="https://www.genecards.org/cgi-bin/carddisp.pl?gene=ALDH1A3">https://www.genecards.org/cgi-bin/carddisp.pl?gene=ALDH1A3</a>             |
| PLCB1   | Phospholipase C Beta 1                                                       | Protein Coding | 53 | GC20P008061 | 6.108633518 | <a href="https://www.genecards.org/cgi-bin/carddisp.pl?gene=PLCB1">https://www.genecards.org/cgi-bin/carddisp.pl?gene=PLCB1</a>                 |
| HSD3B1  | Hydroxy-Delta-5-Steroid Dehydrogenase, 3 Beta- And Steroid Delta-Isomerase 1 | Protein Coding | 49 | GC01P119507 | 6.108185291 | <a href="https://www.genecards.org/cgi-bin/carddisp.pl?gene=HSD3B1">https://www.genecards.org/cgi-bin/carddisp.pl?gene=HSD3B1</a>               |
| HMGA1   | High Mobility Group AT-Hook 1                                                | Protein Coding | 53 | GC06P092259 | 6.101529121 | <a href="https://www.genecards.org/cgi-bin/carddisp.pl?gene=HMGA1">https://www.genecards.org/cgi-bin/carddisp.pl?gene=HMGA1</a>                 |
| ESRRA   | Estrogen Related Receptor Alpha                                              | Protein Coding | 53 | GC11P064305 | 6.093959808 | <a href="https://www.genecards.org/cgi-bin/carddisp.pl?gene=ESRRA">https://www.genecards.org/cgi-bin/carddisp.pl?gene=ESRRA</a>                 |
| FLT3    | Fms Related Receptor Tyrosine Kinase 3                                       | Protein Coding | 60 | GC13M028003 | 6.085923672 | <a href="https://www.genecards.org/cgi-bin/carddisp.pl?gene=FLT3">https://www.genecards.org/cgi-bin/carddisp.pl?gene=FLT3</a>                   |
| CPT1B   | Carnitine Palmitoyltransferase 1B                                            | Protein Coding | 51 | GC22M061624 | 6.08046484  | <a href="https://www.genecards.org/cgi-bin/carddisp.pl?gene=CPT1B">https://www.genecards.org/cgi-bin/carddisp.pl?gene=CPT1B</a>                 |
| GFAP    | Glial Fibrillary Acidic Protein                                              | Protein Coding | 55 | GC17M051925 | 6.074894428 | <a href="https://www.genecards.org/cgi-bin/carddisp.pl?gene=GFAP">https://www.genecards.org/cgi-bin/carddisp.pl?gene=GFAP</a>                   |

|        |                                                     |                |    |             |             |                                                                                                                                   |
|--------|-----------------------------------------------------|----------------|----|-------------|-------------|-----------------------------------------------------------------------------------------------------------------------------------|
| CHAT   | Choline O-Acetyltransferase                         | Protein Coding | 55 | GC10P049609 | 6.072665691 | <a href="https://www.genecards.org/cgi-bin/carddisp.pl?gene=CHAT">https://www.genecards.org/cgi-bin/carddisp.pl?gene=CHAT</a>     |
| DRD2   | Dopamine Receptor D2                                | Protein Coding | 56 | GC11M113409 | 6.065560818 | <a href="https://www.genecards.org/cgi-bin/carddisp.pl?gene=DRD2">https://www.genecards.org/cgi-bin/carddisp.pl?gene=DRD2</a>     |
| ABCC3  | ATP Binding Cassette Subfamily C Member 3           | Protein Coding | 53 | GC17P050634 | 6.057796955 | <a href="https://www.genecards.org/cgi-bin/carddisp.pl?gene=ABCC3">https://www.genecards.org/cgi-bin/carddisp.pl?gene=ABCC3</a>   |
| SLC7A5 | Solute Carrier Family 7 Member 5                    | Protein Coding | 51 | GC16M087830 | 6.049738884 | <a href="https://www.genecards.org/cgi-bin/carddisp.pl?gene=SLC7A5">https://www.genecards.org/cgi-bin/carddisp.pl?gene=SLC7A5</a> |
| NNMT   | Nicotinamide N-Methyltransferase                    | Protein Coding | 51 | GC11P114257 | 6.028770924 | <a href="https://www.genecards.org/cgi-bin/carddisp.pl?gene=NNMT">https://www.genecards.org/cgi-bin/carddisp.pl?gene=NNMT</a>     |
| FABP5  | Fatty Acid Binding Protein 5                        | Protein Coding | 49 | GC08P081282 | 6.027059078 | <a href="https://www.genecards.org/cgi-bin/carddisp.pl?gene=FABP5">https://www.genecards.org/cgi-bin/carddisp.pl?gene=FABP5</a>   |
| F9     | Coagulation Factor IX                               | Protein Coding | 54 | GC0XP139530 | 6.001158714 | <a href="https://www.genecards.org/cgi-bin/carddisp.pl?gene=F9">https://www.genecards.org/cgi-bin/carddisp.pl?gene=F9</a>         |
| AGTR1  | Angiotensin II Receptor Type 1                      | Protein Coding | 58 | GC03P148697 | 5.997434139 | <a href="https://www.genecards.org/cgi-bin/carddisp.pl?gene=AGTR1">https://www.genecards.org/cgi-bin/carddisp.pl?gene=AGTR1</a>   |
| AIFM1  | Apoptosis Inducing Factor Mitochondria Associated 1 | Protein Coding | 56 | GC0XM130129 | 5.993622303 | <a href="https://www.genecards.org/cgi-bin/carddisp.pl?gene=AIFM1">https://www.genecards.org/cgi-bin/carddisp.pl?gene=AIFM1</a>   |
| TG     | Thyroglobulin                                       | Protein Coding | 51 | GC08P132866 | 5.986973286 | <a href="https://www.genecards.org/cgi-bin/carddisp.pl?gene=TG">https://www.genecards.org/cgi-bin/carddisp.pl?gene=TG</a>         |
| LOX    | Lysyl Oxidase                                       | Protein Coding | 54 | GC05M122063 | 5.978069305 | <a href="https://www.genecards.org/cgi-bin/carddisp.pl?gene=LOX">https://www.genecards.org/cgi-bin/carddisp.pl?gene=LOX</a>       |
| SCP2   | Sterol Carrier Protein 2                            | Protein Coding | 52 | GC01P052927 | 5.971069813 | <a href="https://www.genecards.org/cgi-bin/carddisp.pl?gene=SCP2">https://www.genecards.org/cgi-bin/carddisp.pl?gene=SCP2</a>     |
| FOLH1  | Folate Hydrolase 1                                  | Protein Coding | 54 | GC11M099394 | 5.953541756 | <a href="https://www.genecards.org/cgi-bin/carddisp.pl?gene=FOLH1">https://www.genecards.org/cgi-bin/carddisp.pl?gene=FOLH1</a>   |
| ANXA5  | Annexin A5                                          | Protein Coding | 52 | GC04M121667 | 5.934454441 | <a href="https://www.genecards.org/cgi-bin/carddisp.pl?gene=ANXA5">https://www.genecards.org/cgi-bin/carddisp.pl?gene=ANXA5</a>   |
| F3     | Coagulation Factor III, Tissue Factor               | Protein Coding | 52 | GC01M094610 | 5.908566475 | <a href="https://www.genecards.org/cgi-bin/carddisp.pl?gene=GFAP">https://www.genecards.org/cgi-bin/carddisp.pl?gene=GFAP</a>     |

|         |                                                 |                |    |             |             |                                                                                                                                     |
|---------|-------------------------------------------------|----------------|----|-------------|-------------|-------------------------------------------------------------------------------------------------------------------------------------|
| CREB1   | CAMP Responsive Element Binding Protein 1       | Protein Coding | 56 | GC02P207529 | 5.901594639 | <a href="https://www.genecards.org/cgi-bin/carddisp.pl?gene=CREB1">https://www.genecards.org/cgi-bin/carddisp.pl?gene=CREB1</a>     |
| MAP2K1  | Mitogen-Activated Protein Kinase Kinase 1       | Protein Coding | 60 | GC15P066386 | 5.901299477 | <a href="https://www.genecards.org/cgi-bin/carddisp.pl?gene=MAP2K1">https://www.genecards.org/cgi-bin/carddisp.pl?gene=MAP2K1</a>   |
| HGSNAT  | Heparan-Alpha-Glucosaminide N-Acetyltransferase | Protein Coding | 43 | GC08P043140 | 5.899586678 | <a href="https://www.genecards.org/cgi-bin/carddisp.pl?gene=HGSNAT">https://www.genecards.org/cgi-bin/carddisp.pl?gene=HGSNAT</a>   |
| CCL11   | C-C Motif Chemokine Ligand 11                   | Protein Coding | 52 | GC17P034285 | 5.89659977  | <a href="https://www.genecards.org/cgi-bin/carddisp.pl?gene=CCL11">https://www.genecards.org/cgi-bin/carddisp.pl?gene=CCL11</a>     |
| SST     | Somatostatin                                    | Protein Coding | 47 | GC03M187668 | 5.892080307 | <a href="https://www.genecards.org/cgi-bin/carddisp.pl?gene=SST">https://www.genecards.org/cgi-bin/carddisp.pl?gene=SST</a>         |
| ABCB7   | ATP Binding Cassette Subfamily B Member 7       | Protein Coding | 50 | GC0XM075053 | 5.879004955 | <a href="https://www.genecards.org/cgi-bin/carddisp.pl?gene=ABCB7">https://www.genecards.org/cgi-bin/carddisp.pl?gene=ABCB7</a>     |
| NFKBIA  | NFKB Inhibitor Alpha                            | Protein Coding | 57 | GC14M035401 | 5.857986927 | <a href="https://www.genecards.org/cgi-bin/carddisp.pl?gene=NFKBIA">https://www.genecards.org/cgi-bin/carddisp.pl?gene=NFKBIA</a>   |
| ASNS    | Asparagine Synthetase (Glutamine-Hydrolyzing)   | Protein Coding | 54 | GC07M097854 | 5.841819763 | <a href="https://www.genecards.org/cgi-bin/carddisp.pl?gene=ASNS">https://www.genecards.org/cgi-bin/carddisp.pl?gene=ASNS</a>       |
| HNRNPA1 | Heterogeneous Nuclear Ribonucleoprotein A1      | Protein Coding | 55 | GC12P054280 | 5.838124752 | <a href="https://www.genecards.org/cgi-bin/carddisp.pl?gene=HNRNPA1">https://www.genecards.org/cgi-bin/carddisp.pl?gene=HNRNPA1</a> |
| ARSH    | Arylsulfatase Family Member H                   | Protein Coding | 39 | GC0XP003006 | 5.814909458 | <a href="https://www.genecards.org/cgi-bin/carddisp.pl?gene=ARSH">https://www.genecards.org/cgi-bin/carddisp.pl?gene=ARSH</a>       |
| UGT2B4  | UDP Glucuronosyltransferase Family 2 Member B4  | Protein Coding | 47 | GC04M069484 | 5.801847935 | <a href="https://www.genecards.org/cgi-bin/carddisp.pl?gene=UGT2B4">https://www.genecards.org/cgi-bin/carddisp.pl?gene=UGT2B4</a>   |
| GAD1    | Glutamate Decarboxylase 1                       | Protein Coding | 56 | GC02P170813 | 5.800939083 | <a href="https://www.genecards.org/cgi-bin/carddisp.pl?gene=GAD1">https://www.genecards.org/cgi-bin/carddisp.pl?gene=GAD1</a>       |
| GLO1    | Glyoxalase I                                    | Protein Coding | 52 | GC06M071882 | 5.783227921 | <a href="https://www.genecards.org/cgi-bin/carddisp.pl?gene=GLO1">https://www.genecards.org/cgi-bin/carddisp.pl?gene=GLO1</a>       |
| TPH2    | Tryptophan Hydroxylase 2                        | Protein Coding | 56 | GC12P071938 | 5.7809062   | <a href="https://www.genecards.org/cgi-bin/carddisp.pl?gene=TPH2">https://www.genecards.org/cgi-bin/carddisp.pl?gene=TPH2</a>       |
| CTSA    | Cathepsin A                                     | Protein Coding | 53 | GC20P045890 | 5.778818607 | <a href="https://www.genecards.org/cgi-bin/carddisp.pl?gene=CTSA">https://www.genecards.org/cgi-bin/carddisp.pl?gene=CTSA</a>       |

|         |                                                   |                |    |             |             |                                                                                                                                     |
|---------|---------------------------------------------------|----------------|----|-------------|-------------|-------------------------------------------------------------------------------------------------------------------------------------|
| CRH     | Corticotropin Releasing Hormone                   | Protein Coding | 50 | GC08M066176 | 5.773647785 | <a href="https://www.genecards.org/cgi-bin/carddisp.pl?gene=CTSA">https://www.genecards.org/cgi-bin/carddisp.pl?gene=CTSA</a>       |
| EP300   | E1A Binding Protein P300                          | Protein Coding | 59 | GC22P045272 | 5.772609711 | <a href="https://www.genecards.org/cgi-bin/carddisp.pl?gene=CRH">https://www.genecards.org/cgi-bin/carddisp.pl?gene=CRH</a>         |
| FGF2    | Fibroblast Growth Factor 2                        | Protein Coding | 52 | GC04P122826 | 5.771065235 | <a href="https://www.genecards.org/cgi-bin/carddisp.pl?gene=EP300">https://www.genecards.org/cgi-bin/carddisp.pl?gene=EP300</a>     |
| MGLL    | Monoglyceride Lipase                              | Protein Coding | 51 | GC03M127689 | 5.765919685 | <a href="https://www.genecards.org/cgi-bin/carddisp.pl?gene=FGF2">https://www.genecards.org/cgi-bin/carddisp.pl?gene=FGF2</a>       |
| MAPK3   | Mitogen-Activated Protein Kinase 3                | Protein Coding | 56 | GC16M038440 | 5.753620148 | <a href="https://www.genecards.org/cgi-bin/carddisp.pl?gene=MGLL">https://www.genecards.org/cgi-bin/carddisp.pl?gene=MGLL</a>       |
| ABCC6   | ATP Binding Cassette Subfamily C Member 6         | Protein Coding | 53 | GC16M016148 | 5.726374149 | <a href="https://www.genecards.org/cgi-bin/carddisp.pl?gene=MAPK3">https://www.genecards.org/cgi-bin/carddisp.pl?gene=MAPK3</a>     |
| AGPAT1  | 1-Acylglycerol-3-Phosphate O-Acyltransferase 1    | Protein Coding | 47 | GC06M032168 | 5.723912716 | <a href="https://www.genecards.org/cgi-bin/carddisp.pl?gene=ABCC6">https://www.genecards.org/cgi-bin/carddisp.pl?gene=ABCC6</a>     |
| DMD     | Dystrophin                                        | Protein Coding | 52 | GC0XM031097 | 5.719425678 | <a href="https://www.genecards.org/cgi-bin/carddisp.pl?gene=AGPAT1">https://www.genecards.org/cgi-bin/carddisp.pl?gene=AGPAT1</a>   |
| SULT2B1 | Sulfotransferase Family 2B Member 1               | Protein Coding | 52 | GC19P048552 | 5.709708691 | <a href="https://www.genecards.org/cgi-bin/carddisp.pl?gene=DMD">https://www.genecards.org/cgi-bin/carddisp.pl?gene=DMD</a>         |
| MET     | MET Proto-Oncogene, Receptor Tyrosine Kinase      | Protein Coding | 61 | GC07P116672 | 5.706713676 | <a href="https://www.genecards.org/cgi-bin/carddisp.pl?gene=SULT2B1">https://www.genecards.org/cgi-bin/carddisp.pl?gene=SULT2B1</a> |
| MAPT    | Microtubule Associated Protein Tau                | Protein Coding | 57 | GC17P045894 | 5.706644535 | <a href="https://www.genecards.org/cgi-bin/carddisp.pl?gene=MET">https://www.genecards.org/cgi-bin/carddisp.pl?gene=MET</a>         |
| PTPN22  | Protein Tyrosine Phosphatase Non-Receptor Type 22 | Protein Coding | 54 | GC01M113813 | 5.706405664 | <a href="https://www.genecards.org/cgi-bin/carddisp.pl?gene=MAPT">https://www.genecards.org/cgi-bin/carddisp.pl?gene=MAPT</a>       |
| PGAM2   | Phosphoglycerate Mutase 2                         | Protein Coding | 51 | GC07M044062 | 5.703668118 | <a href="https://www.genecards.org/cgi-bin/carddisp.pl?gene=PTPN22">https://www.genecards.org/cgi-bin/carddisp.pl?gene=PTPN22</a>   |
| EGF     | Epidermal Growth Factor                           | Protein Coding | 58 | GC04P109912 | 5.701561451 | <a href="https://www.genecards.org/cgi-bin/carddisp.pl?gene=PGAM2">https://www.genecards.org/cgi-bin/carddisp.pl?gene=PGAM2</a>     |
| ACSM1   | Acyl-CoA Synthetase Medium Chain Family Member 1  | Protein Coding | 46 | GC16M020634 | 5.699780464 | <a href="https://www.genecards.org/cgi-bin/carddisp.pl?gene=EGF">https://www.genecards.org/cgi-bin/carddisp.pl?gene=EGF</a>         |
|         |                                                   |                |    |             |             | <a href="https://www.genecards.org/cgi-bin/carddisp.pl?gene=ACSM1">https://www.genecards.org/cgi-bin/carddisp.pl?gene=ACSM1</a>     |

|          |                                                          |                |    |             |             |                                                                                                                                       |
|----------|----------------------------------------------------------|----------------|----|-------------|-------------|---------------------------------------------------------------------------------------------------------------------------------------|
| PSEN1    | Presenilin 1                                             | Protein Coding | 60 | GC14P073136 | 5.696412563 | <a href="https://www.genecards.org/cgi-bin/carddisp.pl?gene=PSEN1">https://www.genecards.org/cgi-bin/carddisp.pl?gene=PSEN1</a>       |
| F5       | Coagulation Factor V                                     | Protein Coding | 53 | GC01M169511 | 5.685031414 | <a href="https://www.genecards.org/cgi-bin/carddisp.pl?gene=F5">https://www.genecards.org/cgi-bin/carddisp.pl?gene=F5</a>             |
| SLC5A4   | Solute Carrier Family 5 Member 4                         | Protein Coding | 46 | GC22M032218 | 5.675738335 | <a href="https://www.genecards.org/cgi-bin/carddisp.pl?gene=SLC5A4">https://www.genecards.org/cgi-bin/carddisp.pl?gene=SLC5A4</a>     |
| NT5E     | 5'-Nucleotidase Ecto                                     | Protein Coding | 59 | GC06P085449 | 5.674291611 | <a href="https://www.genecards.org/cgi-bin/carddisp.pl?gene=NT5E">https://www.genecards.org/cgi-bin/carddisp.pl?gene=NT5E</a>         |
| DCK      | Deoxycytidine Kinase                                     | Protein Coding | 50 | GC04P070992 | 5.673641205 | <a href="https://www.genecards.org/cgi-bin/carddisp.pl?gene=DCK">https://www.genecards.org/cgi-bin/carddisp.pl?gene=DCK</a>           |
| SCN4A    | Sodium Voltage-Gated Channel Alpha Subunit 4             | Protein Coding | 52 | GC17M063938 | 5.664630413 | <a href="https://www.genecards.org/cgi-bin/carddisp.pl?gene=SCN4A">https://www.genecards.org/cgi-bin/carddisp.pl?gene=SCN4A</a>       |
| THRA     | Thyroid Hormone Receptor Alpha                           | Protein Coding | 55 | GC17P040058 | 5.65968132  | <a href="https://www.genecards.org/cgi-bin/carddisp.pl?gene=THRA">https://www.genecards.org/cgi-bin/carddisp.pl?gene=THRA</a>         |
| HLA-DRB1 | Major Histocompatibility Complex, Class II, DR Beta 1    | Protein Coding | 53 | GC06M071772 | 5.655965805 | <a href="https://www.genecards.org/cgi-bin/carddisp.pl?gene=HLA-DRB1">https://www.genecards.org/cgi-bin/carddisp.pl?gene=HLA-DRB1</a> |
| HDAC9    | Histone Deacetylase 9                                    | Protein Coding | 56 | GC07P018086 | 5.649218082 | <a href="https://www.genecards.org/cgi-bin/carddisp.pl?gene=HDAC9">https://www.genecards.org/cgi-bin/carddisp.pl?gene=HDAC9</a>       |
| CREBBP   | CREB Binding Protein                                     | Protein Coding | 60 | GC16M008258 | 5.642336845 | <a href="https://www.genecards.org/cgi-bin/carddisp.pl?gene=CREBBP">https://www.genecards.org/cgi-bin/carddisp.pl?gene=CREBBP</a>     |
| KARS1    | Lysyl-TRNA Synthetase 1                                  | Protein Coding | 52 | GC16M075800 | 5.635137081 | <a href="https://www.genecards.org/cgi-bin/carddisp.pl?gene=KARS1">https://www.genecards.org/cgi-bin/carddisp.pl?gene=KARS1</a>       |
| EIF2S1   | Eukaryotic Translation Initiation Factor 2 Subunit Alpha | Protein Coding | 50 | GC14P067359 | 5.618702412 | <a href="https://www.genecards.org/cgi-bin/carddisp.pl?gene=EIF2S1">https://www.genecards.org/cgi-bin/carddisp.pl?gene=EIF2S1</a>     |
| FABP3    | Fatty Acid Binding Protein 3                             | Protein Coding | 50 | GC01M031365 | 5.583105087 | <a href="https://www.genecards.org/cgi-bin/carddisp.pl?gene=FABP3">https://www.genecards.org/cgi-bin/carddisp.pl?gene=FABP3</a>       |
| LPXN     | Leupaxin                                                 | Protein Coding | 47 | GC11M099445 | 5.580239773 | <a href="https://www.genecards.org/cgi-bin/carddisp.pl?gene=LPXN">https://www.genecards.org/cgi-bin/carddisp.pl?gene=LPXN</a>         |
| VDAC1    | Voltage Dependent Anion Channel 1                        | Protein Coding | 53 | GC05M133975 | 5.569249153 | <a href="https://www.genecards.org/cgi-bin/carddisp.pl?gene=VDAC1">https://www.genecards.org/cgi-bin/carddisp.pl?gene=VDAC1</a>       |

|         |                                                                                                   |                |    |             |             |                                                                                                                                     |
|---------|---------------------------------------------------------------------------------------------------|----------------|----|-------------|-------------|-------------------------------------------------------------------------------------------------------------------------------------|
| EHMT2   | Euchromatic Histone Lysine Methyltransferase 2                                                    | Protein Coding | 52 | GC06M031879 | 5.56857872  | <a href="https://www.genecards.org/cgi-bin/carddisp.pl?gene=EHMT2">https://www.genecards.org/cgi-bin/carddisp.pl?gene=EHMT2</a>     |
| HNMT    | Histamine N-Methyltransferase                                                                     | Protein Coding | 52 | GC02P137964 | 5.568031788 | <a href="https://www.genecards.org/cgi-bin/carddisp.pl?gene=HNMT">https://www.genecards.org/cgi-bin/carddisp.pl?gene=HNMT</a>       |
| IL1RN   | Interleukin 1 Receptor Antagonist                                                                 | Protein Coding | 57 | GC02P123802 | 5.564380646 | <a href="https://www.genecards.org/cgi-bin/carddisp.pl?gene=IL1RN">https://www.genecards.org/cgi-bin/carddisp.pl?gene=IL1RN</a>     |
| HLA-A   | Major Histocompatibility Complex, Class I, A                                                      | Protein Coding | 52 | GC06P092113 | 5.557308197 | <a href="https://www.genecards.org/cgi-bin/carddisp.pl?gene=HLA-A">https://www.genecards.org/cgi-bin/carddisp.pl?gene=HLA-A</a>     |
| FGFR2   | Fibroblast Growth Factor Receptor 2                                                               | Protein Coding | 63 | GC10M121478 | 5.551764965 | <a href="https://www.genecards.org/cgi-bin/carddisp.pl?gene=FGFR2">https://www.genecards.org/cgi-bin/carddisp.pl?gene=FGFR2</a>     |
| SMARCA4 | SWI/SNF Related, Matrix Associated, Actin Dependent Regulator Of Chromatin, Subfamily A, Member 4 | Protein Coding | 57 | GC19P010932 | 5.540520191 | <a href="https://www.genecards.org/cgi-bin/carddisp.pl?gene=SMARCA4">https://www.genecards.org/cgi-bin/carddisp.pl?gene=SMARCA4</a> |
| GNRH1   | Gonadotropin Releasing Hormone 1                                                                  | Protein Coding | 47 | GC08M025419 | 5.540391922 | <a href="https://www.genecards.org/cgi-bin/carddisp.pl?gene=GNRH1">https://www.genecards.org/cgi-bin/carddisp.pl?gene=GNRH1</a>     |
| ARNT    | Aryl Hydrocarbon Receptor Nuclear Translocator                                                    | Protein Coding | 51 | GC01M150809 | 5.535038948 | <a href="https://www.genecards.org/cgi-bin/carddisp.pl?gene=ARNT">https://www.genecards.org/cgi-bin/carddisp.pl?gene=ARNT</a>       |
| ANPEP   | Alanyl Aminopeptidase, Membrane                                                                   | Protein Coding | 57 | GC15M089784 | 5.533632755 | <a href="https://www.genecards.org/cgi-bin/carddisp.pl?gene=ANPEP">https://www.genecards.org/cgi-bin/carddisp.pl?gene=ANPEP</a>     |
| PRKCA   | Protein Kinase C Alpha                                                                            | Protein Coding | 57 | GC17P066302 | 5.513727188 | <a href="https://www.genecards.org/cgi-bin/carddisp.pl?gene=PRKCA">https://www.genecards.org/cgi-bin/carddisp.pl?gene=PRKCA</a>     |
| CFH     | Complement Factor H                                                                               | Protein Coding | 54 | GC01P196621 | 5.510847569 | <a href="https://www.genecards.org/cgi-bin/carddisp.pl?gene=CFH">https://www.genecards.org/cgi-bin/carddisp.pl?gene=CFH</a>         |
| SMPD2   | Sphingomyelin Phosphodiesterase 2                                                                 | Protein Coding | 47 | GC06P109440 | 5.505710602 | <a href="https://www.genecards.org/cgi-bin/carddisp.pl?gene=SMPD2">https://www.genecards.org/cgi-bin/carddisp.pl?gene=SMPD2</a>     |
| KIT     | KIT Proto-Oncogene, Receptor Tyrosine Kinase                                                      | Protein Coding | 60 | GC04P054657 | 5.501556873 | <a href="https://www.genecards.org/cgi-bin/carddisp.pl?gene=KIT">https://www.genecards.org/cgi-bin/carddisp.pl?gene=KIT</a>         |
| TERT    | Telomerase Reverse Transcriptase                                                                  | Protein Coding | 58 | GC05M001253 | 5.497232914 | <a href="https://www.genecards.org/cgi-bin/carddisp.pl?gene=TERT">https://www.genecards.org/cgi-bin/carddisp.pl?gene=TERT</a>       |
| MBOAT7  | Membrane Bound O-Acyltransferase Domain Containing 7                                              | Protein Coding | 46 | GC19M054173 | 5.496452332 | <a href="https://www.genecards.org/cgi-bin/carddisp.pl?gene=MBOAT7">https://www.genecards.org/cgi-bin/carddisp.pl?gene=MBOAT7</a>   |

|          |                                                       |                |    |             |             |                                                                                                                                       |
|----------|-------------------------------------------------------|----------------|----|-------------|-------------|---------------------------------------------------------------------------------------------------------------------------------------|
| TK1      | Thymidine Kinase 1                                    | Protein Coding | 52 | GC17M078175 | 5.495685577 | <a href="https://www.genecards.org/cgi-bin/carddisp.pl?gene=MBOAT7">https://www.genecards.org/cgi-bin/carddisp.pl?gene=MBOAT7</a>     |
| MTM1     | Myotubularin 1                                        | Protein Coding | 50 | GC0XP150562 | 5.492345333 | <a href="https://www.genecards.org/cgi-bin/carddisp.pl?gene=TK1">https://www.genecards.org/cgi-bin/carddisp.pl?gene=TK1</a>           |
| SPTLC1   | Serine Palmitoyltransferase Long Chain Base Subunit 1 | Protein Coding | 53 | GC09M096508 | 5.490951538 | <a href="https://www.genecards.org/cgi-bin/carddisp.pl?gene=MTM1">https://www.genecards.org/cgi-bin/carddisp.pl?gene=MTM1</a>         |
| NFKB1    | Nuclear Factor Kappa B Subunit 1                      | Protein Coding | 60 | GC04P102501 | 5.488479137 | <a href="https://www.genecards.org/cgi-bin/carddisp.pl?gene=SPTLC1">https://www.genecards.org/cgi-bin/carddisp.pl?gene=SPTLC1</a>     |
| ERCC5    | ERCC Excision Repair 5, Endonuclease                  | Protein Coding | 51 | GC13P102845 | 5.477799416 | <a href="https://www.genecards.org/cgi-bin/carddisp.pl?gene=NFKB1">https://www.genecards.org/cgi-bin/carddisp.pl?gene=NFKB1</a>       |
| SP1      | Sp1 Transcription Factor                              | Protein Coding | 53 | GC12P053380 | 5.475884914 | <a href="https://www.genecards.org/cgi-bin/carddisp.pl?gene=ERCC5">https://www.genecards.org/cgi-bin/carddisp.pl?gene=ERCC5</a>       |
| HNRNPK   | Heterogeneous Nuclear Ribonucleoprotein K             | Protein Coding | 52 | GC09M096203 | 5.475253105 | <a href="https://www.genecards.org/cgi-bin/carddisp.pl?gene=SP1">https://www.genecards.org/cgi-bin/carddisp.pl?gene=SP1</a>           |
| NPPB     | Natriuretic Peptide B                                 | Protein Coding | 50 | GC01M011858 | 5.447532177 | <a href="https://www.genecards.org/cgi-bin/carddisp.pl?gene=HNRNPK">https://www.genecards.org/cgi-bin/carddisp.pl?gene=HNRNPK</a>     |
| TNFRSF1B | TNF Receptor Superfamily Member 1B                    | Protein Coding | 56 | GC01P012301 | 5.443855286 | <a href="https://www.genecards.org/cgi-bin/carddisp.pl?gene=NPPB">https://www.genecards.org/cgi-bin/carddisp.pl?gene=NPPB</a>         |
| SLC22A2  | Solute Carrier Family 22 Member 2                     | Protein Coding | 50 | GC06M160195 | 5.439086437 | <a href="https://www.genecards.org/cgi-bin/carddisp.pl?gene=TNFRSF1B">https://www.genecards.org/cgi-bin/carddisp.pl?gene=TNFRSF1B</a> |
| SLC25A3  | Solute Carrier Family 25 Member 3                     | Protein Coding | 51 | GC12P098593 | 5.434689522 | <a href="https://www.genecards.org/cgi-bin/carddisp.pl?gene=SLC22A2">https://www.genecards.org/cgi-bin/carddisp.pl?gene=SLC22A2</a>   |
| ABL1     | ABL Proto-Oncogene 1, Non-Receptor Tyrosine Kinase    | Protein Coding | 59 | GC09P130713 | 5.431687832 | <a href="https://www.genecards.org/cgi-bin/carddisp.pl?gene=SLC25A3">https://www.genecards.org/cgi-bin/carddisp.pl?gene=SLC25A3</a>   |
| SCARB2   | Scavenger Receptor Class B Member 2                   | Protein Coding | 53 | GC04M076158 | 5.430082798 | <a href="https://www.genecards.org/cgi-bin/carddisp.pl?gene=ABL1">https://www.genecards.org/cgi-bin/carddisp.pl?gene=ABL1</a>         |
| ENPP2    | Ectonucleotide Pyrophosphatase/Phosphodiesterase 2    | Protein Coding | 52 | GC08M119556 | 5.429513454 | <a href="https://www.genecards.org/cgi-bin/carddisp.pl?gene=SCARB2">https://www.genecards.org/cgi-bin/carddisp.pl?gene=SCARB2</a>     |
| DNM2     | Dynamin 2                                             | Protein Coding | 56 | GC19P010718 | 5.426211834 | <a href="https://www.genecards.org/cgi-bin/carddisp.pl?gene=ENPP2">https://www.genecards.org/cgi-bin/carddisp.pl?gene=ENPP2</a>       |

|          |                                                      |                |    |             |             |                                                                                                                                       |
|----------|------------------------------------------------------|----------------|----|-------------|-------------|---------------------------------------------------------------------------------------------------------------------------------------|
| ENO3     | Enolase 3                                            | Protein Coding | 55 | GC17P004948 | 5.420696259 | <a href="https://www.genecards.org/cgi-bin/carddisp.pl?gene=ENO3">https://www.genecards.org/cgi-bin/carddisp.pl?gene=ENO3</a>         |
| IGFBP2   | Insulin Like Growth Factor Binding Protein 2         | Protein Coding | 51 | GC02P216632 | 5.415290833 | <a href="https://www.genecards.org/cgi-bin/carddisp.pl?gene=IGFBP2">https://www.genecards.org/cgi-bin/carddisp.pl?gene=IGFBP2</a>     |
| AGA      | Aspartylglucosaminidase                              | Protein Coding | 52 | GC04M177430 | 5.402294636 | <a href="https://www.genecards.org/cgi-bin/carddisp.pl?gene=AGA">https://www.genecards.org/cgi-bin/carddisp.pl?gene=AGA</a>           |
| UROS     | Uroporphyrinogen III Synthase                        | Protein Coding | 48 | GC10M125784 | 5.398243904 | <a href="https://www.genecards.org/cgi-bin/carddisp.pl?gene=UROS">https://www.genecards.org/cgi-bin/carddisp.pl?gene=UROS</a>         |
| PDE5A    | Phosphodiesterase 5A                                 | Protein Coding | 52 | GC04M119494 | 5.394932747 | <a href="https://www.genecards.org/cgi-bin/carddisp.pl?gene=PDE5A">https://www.genecards.org/cgi-bin/carddisp.pl?gene=PDE5A</a>       |
| BLVRB    | Biliverdin Reductase B                               | Protein Coding | 46 | GC19M040447 | 5.39385891  | <a href="https://www.genecards.org/cgi-bin/carddisp.pl?gene=BLVRB">https://www.genecards.org/cgi-bin/carddisp.pl?gene=BLVRB</a>       |
| SERPINC1 | Serpin Family C Member 1                             | Protein Coding | 56 | GC01M174653 | 5.383127689 | <a href="https://www.genecards.org/cgi-bin/carddisp.pl?gene=SERPINC1">https://www.genecards.org/cgi-bin/carddisp.pl?gene=SERPINC1</a> |
| PLA2G5   | Phospholipase A2 Group V                             | Protein Coding | 48 | GC01P020028 | 5.379155159 | <a href="https://www.genecards.org/cgi-bin/carddisp.pl?gene=PLA2G5">https://www.genecards.org/cgi-bin/carddisp.pl?gene=PLA2G5</a>     |
| CD40LG   | CD40 Ligand                                          | Protein Coding | 57 | GC0XP136649 | 5.369486809 | <a href="https://www.genecards.org/cgi-bin/carddisp.pl?gene=CD40LG">https://www.genecards.org/cgi-bin/carddisp.pl?gene=CD40LG</a>     |
| NCOA2    | Nuclear Receptor Coactivator 2                       | Protein Coding | 52 | GC08M070109 | 5.368606567 | <a href="https://www.genecards.org/cgi-bin/carddisp.pl?gene=NCOA2">https://www.genecards.org/cgi-bin/carddisp.pl?gene=NCOA2</a>       |
| CEL      | Carboxyl Ester Lipase                                | Protein Coding | 52 | GC09P133061 | 5.360735893 | <a href="https://www.genecards.org/cgi-bin/carddisp.pl?gene=CEL">https://www.genecards.org/cgi-bin/carddisp.pl?gene=CEL</a>           |
| ADH5     | Alcohol Dehydrogenase 5 (Class III), Chi Polypeptide | Protein Coding | 53 | GC04M099070 | 5.359493732 | <a href="https://www.genecards.org/cgi-bin/carddisp.pl?gene=ADH5">https://www.genecards.org/cgi-bin/carddisp.pl?gene=ADH5</a>         |
| ACSL1    | Acyl-CoA Synthetase Long Chain Family Member 1       | Protein Coding | 52 | GC04M184755 | 5.358801365 | <a href="https://www.genecards.org/cgi-bin/carddisp.pl?gene=ACSL1">https://www.genecards.org/cgi-bin/carddisp.pl?gene=ACSL1</a>       |
| VWF      | Von Willebrand Factor                                | Protein Coding | 55 | GC12M005949 | 5.354763508 | <a href="https://www.genecards.org/cgi-bin/carddisp.pl?gene=VWF">https://www.genecards.org/cgi-bin/carddisp.pl?gene=VWF</a>           |
| FSHR     | Follicle Stimulating Hormone Receptor                | Protein Coding | 54 | GC02M048962 | 5.346429825 | <a href="https://www.genecards.org/cgi-bin/carddisp.pl?gene=FSHR">https://www.genecards.org/cgi-bin/carddisp.pl?gene=FSHR</a>         |

|          |                                                            |                |    |             |             |                                                                                                                                       |
|----------|------------------------------------------------------------|----------------|----|-------------|-------------|---------------------------------------------------------------------------------------------------------------------------------------|
| SAA1     | Serum Amyloid A1                                           | Protein Coding | 46 | GC11P018579 | 5.33243227  | <a href="https://www.genecards.org/cgi-bin/carddisp.pl?gene=SAA1">https://www.genecards.org/cgi-bin/carddisp.pl?gene=SAA1</a>         |
| PSTPIP1  | Proline-Serine-Threonine Phosphatase Interacting Protein 1 | Protein Coding | 50 | GC15P076993 | 5.325975895 | <a href="https://www.genecards.org/cgi-bin/carddisp.pl?gene=PSTPIP1">https://www.genecards.org/cgi-bin/carddisp.pl?gene=PSTPIP1</a>   |
| PDHB     | Pyruvate Dehydrogenase E1 Subunit Beta                     | Protein Coding | 52 | GC03M058428 | 5.320480824 | <a href="https://www.genecards.org/cgi-bin/carddisp.pl?gene=PDHB">https://www.genecards.org/cgi-bin/carddisp.pl?gene=PDHB</a>         |
| DAO      | D-Amino Acid Oxidase                                       | Protein Coding | 51 | GC12P108859 | 5.318780422 | <a href="https://www.genecards.org/cgi-bin/carddisp.pl?gene=DAO">https://www.genecards.org/cgi-bin/carddisp.pl?gene=DAO</a>           |
| SHC1     | SHC Adaptor Protein 1                                      | Protein Coding | 50 | GC01M154962 | 5.312389851 | <a href="https://www.genecards.org/cgi-bin/carddisp.pl?gene=SHC1">https://www.genecards.org/cgi-bin/carddisp.pl?gene=SHC1</a>         |
| PTH1R    | Parathyroid Hormone 1 Receptor                             | Protein Coding | 57 | GC03P046877 | 5.307143688 | <a href="https://www.genecards.org/cgi-bin/carddisp.pl?gene=PTH1R">https://www.genecards.org/cgi-bin/carddisp.pl?gene=PTH1R</a>       |
| GRIN2A   | Glutamate Ionotropic Receptor NMDA Type Subunit 2A         | Protein Coding | 59 | GC16M009753 | 5.30063343  | <a href="https://www.genecards.org/cgi-bin/carddisp.pl?gene=GRIN2A">https://www.genecards.org/cgi-bin/carddisp.pl?gene=GRIN2A</a>     |
| FABP12   | Fatty Acid Binding Protein 12                              | Protein Coding | 38 | GC08M081524 | 5.29920435  | <a href="https://www.genecards.org/cgi-bin/carddisp.pl?gene=FABP12">https://www.genecards.org/cgi-bin/carddisp.pl?gene=FABP12</a>     |
| IL6R     | Interleukin 6 Receptor                                     | Protein Coding | 57 | GC01P154405 | 5.290779114 | <a href="https://www.genecards.org/cgi-bin/carddisp.pl?gene=IL6R">https://www.genecards.org/cgi-bin/carddisp.pl?gene=IL6R</a>         |
| RAD51    | RAD51 Recombinase                                          | Protein Coding | 57 | GC15P040694 | 5.285461426 | <a href="https://www.genecards.org/cgi-bin/carddisp.pl?gene=RAD51">https://www.genecards.org/cgi-bin/carddisp.pl?gene=RAD51</a>       |
| HSP90AA1 | Heat Shock Protein 90 Alpha Family Class A Member 1        | Protein Coding | 57 | GC14M102080 | 5.282570362 | <a href="https://www.genecards.org/cgi-bin/carddisp.pl?gene=HSP90AA1">https://www.genecards.org/cgi-bin/carddisp.pl?gene=HSP90AA1</a> |
| STAT6    | Signal Transducer And Activator Of Transcription 6         | Protein Coding | 57 | GC12M057095 | 5.278360844 | <a href="https://www.genecards.org/cgi-bin/carddisp.pl?gene=STAT6">https://www.genecards.org/cgi-bin/carddisp.pl?gene=STAT6</a>       |
| APEX1    | Apurinic/Apyrimidinic Endodeoxyribonuclease 1              | Protein Coding | 52 | GC14P020455 | 5.276880264 | <a href="https://www.genecards.org/cgi-bin/carddisp.pl?gene=APEX1">https://www.genecards.org/cgi-bin/carddisp.pl?gene=APEX1</a>       |
| SLC22A12 | Solute Carrier Family 22 Member 12                         | Protein Coding | 51 | GC11P064609 | 5.276699543 | <a href="https://www.genecards.org/cgi-bin/carddisp.pl?gene=SLC22A12">https://www.genecards.org/cgi-bin/carddisp.pl?gene=SLC22A12</a> |
| TP63     | Tumor Protein P63                                          | Protein Coding | 53 | GC03P189598 | 5.272655487 | <a href="https://www.genecards.org/cgi-bin/carddisp.pl?gene=TP63">https://www.genecards.org/cgi-bin/carddisp.pl?gene=TP63</a>         |

|         |                                                                       |                |    |             |             |                                                                                                                                     |
|---------|-----------------------------------------------------------------------|----------------|----|-------------|-------------|-------------------------------------------------------------------------------------------------------------------------------------|
| DDIT3   | DNA Damage Inducible Transcript 3                                     | Protein Coding | 52 | GC12M057516 | 5.258716583 | <a href="https://www.genecards.org/cgi-bin/carddisp.pl?gene=DDIT3">https://www.genecards.org/cgi-bin/carddisp.pl?gene=DDIT3</a>     |
| APOH    | Apolipoprotein H                                                      | Protein Coding | 51 | GC17M066212 | 5.254735947 | <a href="https://www.genecards.org/cgi-bin/carddisp.pl?gene=APOH">https://www.genecards.org/cgi-bin/carddisp.pl?gene=APOH</a>       |
| KMO     | Kynurenine 3-Monooxygenase                                            | Protein Coding | 53 | GC01P241532 | 5.254042149 | <a href="https://www.genecards.org/cgi-bin/carddisp.pl?gene=KMO">https://www.genecards.org/cgi-bin/carddisp.pl?gene=KMO</a>         |
| CTSB    | Cathepsin B                                                           | Protein Coding | 59 | GC08M011842 | 5.253155708 | <a href="https://www.genecards.org/cgi-bin/carddisp.pl?gene=CTSB">https://www.genecards.org/cgi-bin/carddisp.pl?gene=CTSB</a>       |
| SRC     | SRC Proto-Oncogene, Non-Receptor Tyrosine Kinase                      | Protein Coding | 58 | GC20P037344 | 5.242369652 | <a href="https://www.genecards.org/cgi-bin/carddisp.pl?gene=SRC">https://www.genecards.org/cgi-bin/carddisp.pl?gene=SRC</a>         |
| DGKB    | Diacylglycerol Kinase Beta                                            | Protein Coding | 50 | GC07M014145 | 5.21872282  | <a href="https://www.genecards.org/cgi-bin/carddisp.pl?gene=DGKB">https://www.genecards.org/cgi-bin/carddisp.pl?gene=DGKB</a>       |
| GATA6   | GATA Binding Protein 6                                                | Protein Coding | 53 | GC18P022169 | 5.218309879 | <a href="https://www.genecards.org/cgi-bin/carddisp.pl?gene=GATA6">https://www.genecards.org/cgi-bin/carddisp.pl?gene=GATA6</a>     |
| IL3     | Interleukin 3                                                         | Protein Coding | 52 | GC05P132060 | 5.218032837 | <a href="https://www.genecards.org/cgi-bin/carddisp.pl?gene=IL3">https://www.genecards.org/cgi-bin/carddisp.pl?gene=IL3</a>         |
| CD46    | CD46 Molecule                                                         | Protein Coding | 55 | GC01P207752 | 5.215385437 | <a href="https://www.genecards.org/cgi-bin/carddisp.pl?gene=CD46">https://www.genecards.org/cgi-bin/carddisp.pl?gene=CD46</a>       |
| F10     | Coagulation Factor X                                                  | Protein Coding | 57 | GC13P113122 | 5.205245495 | <a href="https://www.genecards.org/cgi-bin/carddisp.pl?gene=F10">https://www.genecards.org/cgi-bin/carddisp.pl?gene=F10</a>         |
| FLNA    | Filamin A                                                             | Protein Coding | 55 | GC0XM154348 | 5.204764843 | <a href="https://www.genecards.org/cgi-bin/carddisp.pl?gene=FLNA">https://www.genecards.org/cgi-bin/carddisp.pl?gene=FLNA</a>       |
| ACOT1   | Acyl-CoA Thioesterase 1                                               | Protein Coding | 42 | GC14P073493 | 5.202662945 | <a href="https://www.genecards.org/cgi-bin/carddisp.pl?gene=ACOT1">https://www.genecards.org/cgi-bin/carddisp.pl?gene=ACOT1</a>     |
| PIK3CB  | Phosphatidylinositol-4,5-Bisphosphate 3-Kinase Catalytic Subunit Beta | Protein Coding | 55 | GC03M138652 | 5.201896667 | <a href="https://www.genecards.org/cgi-bin/carddisp.pl?gene=PIK3CB">https://www.genecards.org/cgi-bin/carddisp.pl?gene=PIK3CB</a>   |
| CDKN2A  | Cyclin Dependent Kinase Inhibitor 2A                                  | Protein Coding | 57 | GC09M021967 | 5.197295666 | <a href="https://www.genecards.org/cgi-bin/carddisp.pl?gene=CDKN2A">https://www.genecards.org/cgi-bin/carddisp.pl?gene=CDKN2A</a>   |
| ALOX15B | Arachidonate 15-Lipoxygenase Type B                                   | Protein Coding | 48 | GC17P008039 | 5.185217857 | <a href="https://www.genecards.org/cgi-bin/carddisp.pl?gene=ALOX15B">https://www.genecards.org/cgi-bin/carddisp.pl?gene=ALOX15B</a> |

|         |                                                          |                |    |             |             |                                                                                                                                     |
|---------|----------------------------------------------------------|----------------|----|-------------|-------------|-------------------------------------------------------------------------------------------------------------------------------------|
| GSK3A   | Glycogen Synthase Kinase 3 Alpha                         | Protein Coding | 56 | GC19M070637 | 5.179674149 | <a href="https://www.genecards.org/cgi-bin/carddisp.pl?gene=ALOX15B">https://www.genecards.org/cgi-bin/carddisp.pl?gene=ALOX15B</a> |
| AQP2    | Aquaporin 2                                              | Protein Coding | 53 | GC12P049950 | 5.167989254 | <a href="https://www.genecards.org/cgi-bin/carddisp.pl?gene=GSK3A">https://www.genecards.org/cgi-bin/carddisp.pl?gene=GSK3A</a>     |
| RPS6KB1 | Ribosomal Protein S6 Kinase B1                           | Protein Coding | 55 | GC17P059893 | 5.164863586 | <a href="https://www.genecards.org/cgi-bin/carddisp.pl?gene=AQP2">https://www.genecards.org/cgi-bin/carddisp.pl?gene=AQP2</a>       |
| CXCL10  | C-X-C Motif Chemokine Ligand 10                          | Protein Coding | 51 | GC04M076021 | 5.147573948 | <a href="https://www.genecards.org/cgi-bin/carddisp.pl?gene=RPS6KB1">https://www.genecards.org/cgi-bin/carddisp.pl?gene=RPS6KB1</a> |
| APBB1   | Amyloid Beta Precursor Protein Binding Family B Member 1 | Protein Coding | 51 | GC11M006936 | 5.13942337  | <a href="https://www.genecards.org/cgi-bin/carddisp.pl?gene=CXCL10">https://www.genecards.org/cgi-bin/carddisp.pl?gene=CXCL10</a>   |
| FDX1    | Ferredoxin 1                                             | Protein Coding | 45 | GC11P110429 | 5.134989262 | <a href="https://www.genecards.org/cgi-bin/carddisp.pl?gene=APBB1">https://www.genecards.org/cgi-bin/carddisp.pl?gene=APBB1</a>     |
| CD44    | CD44 Molecule (Indian Blood Group)                       | Protein Coding | 55 | GC11P035139 | 5.127356052 | <a href="https://www.genecards.org/cgi-bin/carddisp.pl?gene=FDX1">https://www.genecards.org/cgi-bin/carddisp.pl?gene=FDX1</a>       |
| IL4I1   | Interleukin 4 Induced 1                                  | Protein Coding | 46 | GC19M070913 | 5.122427464 | <a href="https://www.genecards.org/cgi-bin/carddisp.pl?gene=CD44">https://www.genecards.org/cgi-bin/carddisp.pl?gene=CD44</a>       |
| IL17A   | Interleukin 17A                                          | Protein Coding | 50 | GC06P052186 | 5.119236469 | <a href="https://www.genecards.org/cgi-bin/carddisp.pl?gene=IL4I1">https://www.genecards.org/cgi-bin/carddisp.pl?gene=IL4I1</a>     |
| AOC3    | Amine Oxidase Copper Containing 3                        | Protein Coding | 52 | GC17P042851 | 5.119176865 | <a href="https://www.genecards.org/cgi-bin/carddisp.pl?gene=IL17A">https://www.genecards.org/cgi-bin/carddisp.pl?gene=IL17A</a>     |
| KAT5    | Lysine Acetyltransferase 5                               | Protein Coding | 57 | GC11P065711 | 5.108136654 | <a href="https://www.genecards.org/cgi-bin/carddisp.pl?gene=AOC3">https://www.genecards.org/cgi-bin/carddisp.pl?gene=AOC3</a>       |
| HGF     | Hepatocyte Growth Factor                                 | Protein Coding | 58 | GC07M081699 | 5.10415411  | <a href="https://www.genecards.org/cgi-bin/carddisp.pl?gene=KAT5">https://www.genecards.org/cgi-bin/carddisp.pl?gene=KAT5</a>       |
| XRCC1   | X-Ray Repair Cross Complementing 1                       | Protein Coding | 51 | GC19M043543 | 5.097961426 | <a href="https://www.genecards.org/cgi-bin/carddisp.pl?gene=HGF">https://www.genecards.org/cgi-bin/carddisp.pl?gene=HGF</a>         |
| FFAR1   | Free Fatty Acid Receptor 1                               | Protein Coding | 47 | GC19P073870 | 5.093933582 | <a href="https://www.genecards.org/cgi-bin/carddisp.pl?gene=XRCC1">https://www.genecards.org/cgi-bin/carddisp.pl?gene=XRCC1</a>     |
| EPAS1   | Endothelial PAS Domain Protein 1                         | Protein Coding | 57 | GC02P046293 | 5.093504906 | <a href="https://www.genecards.org/cgi-bin/carddisp.pl?gene=FFAR1">https://www.genecards.org/cgi-bin/carddisp.pl?gene=FFAR1</a>     |
|         |                                                          |                |    |             |             | <a href="https://www.genecards.org/cgi-bin/carddisp.pl?gene=EPAS1">https://www.genecards.org/cgi-bin/carddisp.pl?gene=EPAS1</a>     |

|         |                                                                                  |                |    |             |             |                                                                                                                                   |
|---------|----------------------------------------------------------------------------------|----------------|----|-------------|-------------|-----------------------------------------------------------------------------------------------------------------------------------|
| ABCC5   | ATP Binding Cassette Subfamily C Member 5                                        | Protein Coding | 51 | GC03M183919 | 5.09292078  | <a href="https://www.genecards.org/cgi-bin/carddisp.pl?gene=ABCC5">https://www.genecards.org/cgi-bin/carddisp.pl?gene=ABCC5</a>   |
| ITGB2   | Integrin Subunit Beta 2                                                          | Protein Coding | 57 | GC21M044885 | 5.083768845 | <a href="https://www.genecards.org/cgi-bin/carddisp.pl?gene=ITGB2">https://www.genecards.org/cgi-bin/carddisp.pl?gene=ITGB2</a>   |
| ACOT8   | Acyl-CoA Thioesterase 8                                                          | Protein Coding | 44 | GC20M045841 | 5.071051598 | <a href="https://www.genecards.org/cgi-bin/carddisp.pl?gene=ACOT8">https://www.genecards.org/cgi-bin/carddisp.pl?gene=ACOT8</a>   |
| APPL1   | Adaptor Protein, Phosphotyrosine Interacting With PH Domain And Leucine Zipper 1 | Protein Coding | 51 | GC03P057227 | 5.065500736 | <a href="https://www.genecards.org/cgi-bin/carddisp.pl?gene=APPL1">https://www.genecards.org/cgi-bin/carddisp.pl?gene=APPL1</a>   |
| HMOX2   | Heme Oxygenase 2                                                                 | Protein Coding | 53 | GC16P004474 | 5.051269531 | <a href="https://www.genecards.org/cgi-bin/carddisp.pl?gene=HMOX2">https://www.genecards.org/cgi-bin/carddisp.pl?gene=HMOX2</a>   |
| CSNK2B  | Casein Kinase 2 Beta                                                             | Protein Coding | 55 | GC06P092157 | 5.048334599 | <a href="https://www.genecards.org/cgi-bin/carddisp.pl?gene=CSNK2B">https://www.genecards.org/cgi-bin/carddisp.pl?gene=CSNK2B</a> |
| SRD5A3  | Steroid 5 Alpha-Reductase 3                                                      | Protein Coding | 50 | GC04P055346 | 5.043519974 | <a href="https://www.genecards.org/cgi-bin/carddisp.pl?gene=SRD5A3">https://www.genecards.org/cgi-bin/carddisp.pl?gene=SRD5A3</a> |
| BCR     | BCR Activator Of RhoGEF And GTPase                                               | Protein Coding | 59 | GC22P023179 | 5.043236256 | <a href="https://www.genecards.org/cgi-bin/carddisp.pl?gene=BCR">https://www.genecards.org/cgi-bin/carddisp.pl?gene=BCR</a>       |
| CPT1C   | Carnitine Palmitoyltransferase 1C                                                | Protein Coding | 50 | GC19P049690 | 5.040052414 | <a href="https://www.genecards.org/cgi-bin/carddisp.pl?gene=CPT1C">https://www.genecards.org/cgi-bin/carddisp.pl?gene=CPT1C</a>   |
| NGF     | Nerve Growth Factor                                                              | Protein Coding | 58 | GC01M115285 | 5.035580635 | <a href="https://www.genecards.org/cgi-bin/carddisp.pl?gene=NGF">https://www.genecards.org/cgi-bin/carddisp.pl?gene=NGF</a>       |
| RARA    | Retinoic Acid Receptor Alpha                                                     | Protein Coding | 57 | GC17P040309 | 5.034917831 | <a href="https://www.genecards.org/cgi-bin/carddisp.pl?gene=RARA">https://www.genecards.org/cgi-bin/carddisp.pl?gene=RARA</a>     |
| OSBP    | Oxysterol Binding Protein                                                        | Protein Coding | 47 | GC11M099460 | 5.02068615  | <a href="https://www.genecards.org/cgi-bin/carddisp.pl?gene=OSBP">https://www.genecards.org/cgi-bin/carddisp.pl?gene=OSBP</a>     |
| RELA    | RELA Proto-Oncogene, NF-KB Subunit                                               | Protein Coding | 59 | GC11M065653 | 5.020265102 | <a href="https://www.genecards.org/cgi-bin/carddisp.pl?gene=RELA">https://www.genecards.org/cgi-bin/carddisp.pl?gene=RELA</a>     |
| GPBAR1  | G Protein-Coupled Bile Acid Receptor 1                                           | Protein Coding | 47 | GC02P218259 | 5.01853466  | <a href="https://www.genecards.org/cgi-bin/carddisp.pl?gene=GPBAR1">https://www.genecards.org/cgi-bin/carddisp.pl?gene=GPBAR1</a> |
| SLC22A6 | Solute Carrier Family 22 Member 6                                                | Protein Coding | 51 | GC11M099607 | 5.0164814   | <a href="https://www.genecards.org/cgi-bin/carddisp.pl?gene=EPAS1">https://www.genecards.org/cgi-bin/carddisp.pl?gene=EPAS1</a>   |

|          |                                                                                                                            |                |    |             |             |                                                                                                                                       |
|----------|----------------------------------------------------------------------------------------------------------------------------|----------------|----|-------------|-------------|---------------------------------------------------------------------------------------------------------------------------------------|
| SLC16A2  | Solute Carrier Family 16 Member 2                                                                                          | Protein Coding | 50 | GC0XP074510 | 5.015535355 | <a href="https://www.genecards.org/cgi-bin/carddisp.pl?gene=SLC16A2">https://www.genecards.org/cgi-bin/carddisp.pl?gene=SLC16A2</a>   |
| RET      | Ret Proto-Oncogene                                                                                                         | Protein Coding | 61 | GC10P043237 | 5.005290031 | <a href="https://www.genecards.org/cgi-bin/carddisp.pl?gene=RET">https://www.genecards.org/cgi-bin/carddisp.pl?gene=RET</a>           |
| DHODH    | Dihydroorotate Dehydrogenase (Quinone)                                                                                     | Protein Coding | 53 | GC16P072008 | 5.001195908 | <a href="https://www.genecards.org/cgi-bin/carddisp.pl?gene=DHODH">https://www.genecards.org/cgi-bin/carddisp.pl?gene=DHODH</a>       |
| PLCG1    | Phospholipase C Gamma 1                                                                                                    | Protein Coding | 53 | GC20P041136 | 4.999927521 | <a href="https://www.genecards.org/cgi-bin/carddisp.pl?gene=PLCG1">https://www.genecards.org/cgi-bin/carddisp.pl?gene=PLCG1</a>       |
| IL6ST    | Interleukin 6 Cytokine Family Signal Transducer                                                                            | Protein Coding | 56 | GC05M055935 | 4.997031212 | <a href="https://www.genecards.org/cgi-bin/carddisp.pl?gene=IL6ST">https://www.genecards.org/cgi-bin/carddisp.pl?gene=IL6ST</a>       |
| SPHK1    | Sphingosine Kinase 1                                                                                                       | Protein Coding | 53 | GC17P076376 | 4.993997097 | <a href="https://www.genecards.org/cgi-bin/carddisp.pl?gene=SPHK1">https://www.genecards.org/cgi-bin/carddisp.pl?gene=SPHK1</a>       |
| SLC3A2   | Solute Carrier Family 3 Member 2                                                                                           | Protein Coding | 50 | GC11P062856 | 4.993354797 | <a href="https://www.genecards.org/cgi-bin/carddisp.pl?gene=SLC3A2">https://www.genecards.org/cgi-bin/carddisp.pl?gene=SLC3A2</a>     |
| MIF      | Macrophage Migration Inhibitory Factor                                                                                     | Protein Coding | 55 | GC22P023894 | 4.985460281 | <a href="https://www.genecards.org/cgi-bin/carddisp.pl?gene=MIF">https://www.genecards.org/cgi-bin/carddisp.pl?gene=MIF</a>           |
| GIP      | Gastric Inhibitory Polypeptide                                                                                             | Protein Coding | 44 | GC17M048958 | 4.984392643 | <a href="https://www.genecards.org/cgi-bin/carddisp.pl?gene=GIP">https://www.genecards.org/cgi-bin/carddisp.pl?gene=GIP</a>           |
| GART     | Phosphoribosylglycinamide Formyltransferase, Phosphoribosylglycinamide Synthetase, Phosphoribosylaminoimidazole Synthetase | Protein Coding | 50 | GC21M033503 | 4.982872963 | <a href="https://www.genecards.org/cgi-bin/carddisp.pl?gene=GART">https://www.genecards.org/cgi-bin/carddisp.pl?gene=GART</a>         |
| SELP     | Selectin P                                                                                                                 | Protein Coding | 52 | GC01M169558 | 4.982637405 | <a href="https://www.genecards.org/cgi-bin/carddisp.pl?gene=SELP">https://www.genecards.org/cgi-bin/carddisp.pl?gene=SELP</a>         |
| RPS27A   | Ribosomal Protein S27a                                                                                                     | Protein Coding | 48 | GC02P055231 | 4.981519699 | <a href="https://www.genecards.org/cgi-bin/carddisp.pl?gene=RPS27A">https://www.genecards.org/cgi-bin/carddisp.pl?gene=RPS27A</a>     |
| GAST     | Gastrin                                                                                                                    | Protein Coding | 46 | GC17P041712 | 4.976635933 | <a href="https://www.genecards.org/cgi-bin/carddisp.pl?gene=GAST">https://www.genecards.org/cgi-bin/carddisp.pl?gene=GAST</a>         |
| TNFRSF1A | TNF Receptor Superfamily Member 1A                                                                                         | Protein Coding | 57 | GC12M006328 | 4.969126225 | <a href="https://www.genecards.org/cgi-bin/carddisp.pl?gene=TNFRSF1A">https://www.genecards.org/cgi-bin/carddisp.pl?gene=TNFRSF1A</a> |

|   |         |                                                       |                |    |             |             |                                                                                                                                       |
|---|---------|-------------------------------------------------------|----------------|----|-------------|-------------|---------------------------------------------------------------------------------------------------------------------------------------|
| 1 | HLA-DQB | Major Histocompatibility Complex, Class II, DQ Beta 1 | Protein Coding | 48 | GC06M071781 | 4.959109306 | <a href="https://www.genecards.org/cgi-bin/carddisp.pl?gene=HLA-DQB1">https://www.genecards.org/cgi-bin/carddisp.pl?gene=HLA-DQB1</a> |
|   | COASY   | Coenzyme A Synthase                                   | Protein Coding | 52 | GC17P042561 | 4.956408024 | <a href="https://www.genecards.org/cgi-bin/carddisp.pl?gene=COASY">https://www.genecards.org/cgi-bin/carddisp.pl?gene=COASY</a>       |
|   | MYD88   | MYD88 Innate Immune Signal Transduction Adaptor       | Protein Coding | 56 | GC03P038152 | 4.956139088 | <a href="https://www.genecards.org/cgi-bin/carddisp.pl?gene=MYD88">https://www.genecards.org/cgi-bin/carddisp.pl?gene=MYD88</a>       |
|   | CTSG    | Cathepsin G                                           | Protein Coding | 52 | GC14M024573 | 4.955893993 | <a href="https://www.genecards.org/cgi-bin/carddisp.pl?gene=CTSG">https://www.genecards.org/cgi-bin/carddisp.pl?gene=CTSG</a>         |
|   | PRKACA  | Protein Kinase CAMP-Activated Catalytic Subunit Alpha | Protein Coding | 59 | GC19M014672 | 4.948847294 | <a href="https://www.genecards.org/cgi-bin/carddisp.pl?gene=PRKACA">https://www.genecards.org/cgi-bin/carddisp.pl?gene=PRKACA</a>     |
|   | KDR     | Kinase Insert Domain Receptor                         | Protein Coding | 60 | GC04M055078 | 4.945917606 | <a href="https://www.genecards.org/cgi-bin/carddisp.pl?gene=KDR">https://www.genecards.org/cgi-bin/carddisp.pl?gene=KDR</a>           |
|   | DGAT2   | Diacylglycerol O-Acyltransferase 2                    | Protein Coding | 49 | GC11P075759 | 4.939157963 | <a href="https://www.genecards.org/cgi-bin/carddisp.pl?gene=DGAT2">https://www.genecards.org/cgi-bin/carddisp.pl?gene=DGAT2</a>       |
|   | HDAC1   | Histone Deacetylase 1                                 | Protein Coding | 57 | GC01P032292 | 4.924383163 | <a href="https://www.genecards.org/cgi-bin/carddisp.pl?gene=HDAC1">https://www.genecards.org/cgi-bin/carddisp.pl?gene=HDAC1</a>       |
|   | BTK     | Bruton Tyrosine Kinase                                | Protein Coding | 60 | GC0XM101349 | 4.922725201 | <a href="https://www.genecards.org/cgi-bin/carddisp.pl?gene=BTK">https://www.genecards.org/cgi-bin/carddisp.pl?gene=BTK</a>           |
|   | VIM     | Vimentin                                              | Protein Coding | 57 | GC10P017227 | 4.918421745 | <a href="https://www.genecards.org/cgi-bin/carddisp.pl?gene=VIM">https://www.genecards.org/cgi-bin/carddisp.pl?gene=VIM</a>           |
|   | CHEK2   | Checkpoint Kinase 2                                   | Protein Coding | 61 | GC22M028687 | 4.904974937 | <a href="https://www.genecards.org/cgi-bin/carddisp.pl?gene=CHEK2">https://www.genecards.org/cgi-bin/carddisp.pl?gene=CHEK2</a>       |
|   | CALR    | Calreticulin                                          | Protein Coding | 58 | GC19P012938 | 4.903204918 | <a href="https://www.genecards.org/cgi-bin/carddisp.pl?gene=CALR">https://www.genecards.org/cgi-bin/carddisp.pl?gene=CALR</a>         |
|   | HMGCS1  | 3-Hydroxy-3-Methylglutaryl-CoA Synthase 1             | Protein Coding | 48 | GC05M044196 | 4.901966095 | <a href="https://www.genecards.org/cgi-bin/carddisp.pl?gene=HMGCS1">https://www.genecards.org/cgi-bin/carddisp.pl?gene=HMGCS1</a>     |
|   | GAD2    | Glutamate Decarboxylase 2                             | Protein Coding | 51 | GC10P026216 | 4.901376247 | <a href="https://www.genecards.org/cgi-bin/carddisp.pl?gene=GAD2">https://www.genecards.org/cgi-bin/carddisp.pl?gene=GAD2</a>         |
|   | CYB5R3  | Cytochrome B5 Reductase 3                             | Protein Coding | 52 | GC22M061501 | 4.898460865 | <a href="https://www.genecards.org/cgi-bin/carddisp.pl?gene=CYB5R3">https://www.genecards.org/cgi-bin/carddisp.pl?gene=CYB5R3</a>     |

|         |                                                           |                |    |             |             |                                                                                                                                     |
|---------|-----------------------------------------------------------|----------------|----|-------------|-------------|-------------------------------------------------------------------------------------------------------------------------------------|
| ALAS1   | 5'-Aminolevulinate Synthase 1                             | Protein Coding | 50 | GC03P052198 | 4.893675804 | <a href="https://www.genecards.org/cgi-bin/carddisp.pl?gene=ALAS1">https://www.genecards.org/cgi-bin/carddisp.pl?gene=ALAS1</a>     |
| BAX     | BCL2 Associated X, Apoptosis Regulator                    | Protein Coding | 57 | GC19P048954 | 4.886703491 | <a href="https://www.genecards.org/cgi-bin/carddisp.pl?gene=BAX">https://www.genecards.org/cgi-bin/carddisp.pl?gene=BAX</a>         |
| ACOT4   | Acyl-CoA Thioesterase 4                                   | Protein Coding | 42 | GC14P073592 | 4.880039692 | <a href="https://www.genecards.org/cgi-bin/carddisp.pl?gene=ACOT4">https://www.genecards.org/cgi-bin/carddisp.pl?gene=ACOT4</a>     |
| SPR     | Sepiapterin Reductase                                     | Protein Coding | 56 | GC02P072850 | 4.879478931 | <a href="https://www.genecards.org/cgi-bin/carddisp.pl?gene=SPR">https://www.genecards.org/cgi-bin/carddisp.pl?gene=SPR</a>         |
| VHL     | Von Hippel-Lindau Tumor Suppressor                        | Protein Coding | 54 | GC03P013681 | 4.872748375 | <a href="https://www.genecards.org/cgi-bin/carddisp.pl?gene=VHL">https://www.genecards.org/cgi-bin/carddisp.pl?gene=VHL</a>         |
| SETD2   | SET Domain Containing 2, Histone Lysine Methyltransferase | Protein Coding | 53 | GC03M047033 | 4.872437    | <a href="https://www.genecards.org/cgi-bin/carddisp.pl?gene=SETD2">https://www.genecards.org/cgi-bin/carddisp.pl?gene=SETD2</a>     |
| HBA2    | Hemoglobin Subunit Alpha 2                                | Protein Coding | 48 | GC16P013429 | 4.87237978  | <a href="https://www.genecards.org/cgi-bin/carddisp.pl?gene=HBA2">https://www.genecards.org/cgi-bin/carddisp.pl?gene=HBA2</a>       |
| ACSL6   | Acyl-CoA Synthetase Long Chain Family Member 6            | Protein Coding | 47 | GC05M131949 | 4.870249748 | <a href="https://www.genecards.org/cgi-bin/carddisp.pl?gene=ACSL6">https://www.genecards.org/cgi-bin/carddisp.pl?gene=ACSL6</a>     |
| IDE     | Insulin Degrading Enzyme                                  | Protein Coding | 55 | GC10M092451 | 4.864925861 | <a href="https://www.genecards.org/cgi-bin/carddisp.pl?gene=IDE">https://www.genecards.org/cgi-bin/carddisp.pl?gene=IDE</a>         |
| HSPA5   | Heat Shock Protein Family A (Hsp70) Member 5              | Protein Coding | 55 | GC09M125234 | 4.862672329 | <a href="https://www.genecards.org/cgi-bin/carddisp.pl?gene=HSPA5">https://www.genecards.org/cgi-bin/carddisp.pl?gene=HSPA5</a>     |
| ALDH3B2 | Aldehyde Dehydrogenase 3 Family Member B2                 | Protein Coding | 45 | GC11M067662 | 4.860623837 | <a href="https://www.genecards.org/cgi-bin/carddisp.pl?gene=ALDH3B2">https://www.genecards.org/cgi-bin/carddisp.pl?gene=ALDH3B2</a> |
| CLCN1   | Chloride Voltage-Gated Channel 1                          | Protein Coding | 50 | GC07P143316 | 4.854913712 | <a href="https://www.genecards.org/cgi-bin/carddisp.pl?gene=CLCN1">https://www.genecards.org/cgi-bin/carddisp.pl?gene=CLCN1</a>     |
| NGFR    | Nerve Growth Factor Receptor                              | Protein Coding | 54 | GC17P049495 | 4.847626686 | <a href="https://www.genecards.org/cgi-bin/carddisp.pl?gene=NGFR">https://www.genecards.org/cgi-bin/carddisp.pl?gene=NGFR</a>       |
| KRT18   | Keratin 18                                                | Protein Coding | 56 | GC12P052948 | 4.843678474 | <a href="https://www.genecards.org/cgi-bin/carddisp.pl?gene=KRT18">https://www.genecards.org/cgi-bin/carddisp.pl?gene=KRT18</a>     |
| HBG2    | Hemoglobin Subunit Gamma 2                                | Protein Coding | 47 | GC11M006835 | 4.837977886 | <a href="https://www.genecards.org/cgi-bin/carddisp.pl?gene=HBG2">https://www.genecards.org/cgi-bin/carddisp.pl?gene=HBG2</a>       |

|         |                                                                        |                |    |             |             |                                                                                                                                     |
|---------|------------------------------------------------------------------------|----------------|----|-------------|-------------|-------------------------------------------------------------------------------------------------------------------------------------|
| PSPH    | Phosphoserine Phosphatase                                              | Protein Coding | 52 | GC07M061179 | 4.837378979 | <a href="https://www.genecards.org/cgi-bin/carddisp.pl?gene=PSPH">https://www.genecards.org/cgi-bin/carddisp.pl?gene=PSPH</a>       |
| GNPAT   | Glyceronephosphate O-Acyltransferase                                   | Protein Coding | 51 | GC01P231241 | 4.835204601 | <a href="https://www.genecards.org/cgi-bin/carddisp.pl?gene=GNPAT">https://www.genecards.org/cgi-bin/carddisp.pl?gene=GNPAT</a>     |
| BACE1   | Beta-Secretase 1                                                       | Protein Coding | 53 | GC11M117285 | 4.827996254 | <a href="https://www.genecards.org/cgi-bin/carddisp.pl?gene=BACE1">https://www.genecards.org/cgi-bin/carddisp.pl?gene=BACE1</a>     |
| IGHE    | Immunoglobulin Heavy Constant Epsilon                                  | Protein Coding | 36 | GC14M113319 | 4.824530125 | <a href="https://www.genecards.org/cgi-bin/carddisp.pl?gene=IGHE">https://www.genecards.org/cgi-bin/carddisp.pl?gene=IGHE</a>       |
| CASK    | Calcium/Calmodulin Dependent Serine Protein Kinase                     | Protein Coding | 56 | GC0XM041514 | 4.822626591 | <a href="https://www.genecards.org/cgi-bin/carddisp.pl?gene=CASK">https://www.genecards.org/cgi-bin/carddisp.pl?gene=CASK</a>       |
| DLST    | Dihydrolipoamide S-Succinyltransferase                                 | Protein Coding | 52 | GC14P074881 | 4.821403027 | <a href="https://www.genecards.org/cgi-bin/carddisp.pl?gene=DLST">https://www.genecards.org/cgi-bin/carddisp.pl?gene=DLST</a>       |
| FLG     | Filaggrin                                                              | Protein Coding | 47 | GC01M152828 | 4.818543434 | <a href="https://www.genecards.org/cgi-bin/carddisp.pl?gene=FLG">https://www.genecards.org/cgi-bin/carddisp.pl?gene=FLG</a>         |
| HYOU1   | Hypoxia Up-Regulated 1                                                 | Protein Coding | 52 | GC11M119272 | 4.812234402 | <a href="https://www.genecards.org/cgi-bin/carddisp.pl?gene=HYOU1">https://www.genecards.org/cgi-bin/carddisp.pl?gene=HYOU1</a>     |
| CDKL5   | Cyclin Dependent Kinase Like 5                                         | Protein Coding | 50 | GC0XP018425 | 4.80866766  | <a href="https://www.genecards.org/cgi-bin/carddisp.pl?gene=CDKL5">https://www.genecards.org/cgi-bin/carddisp.pl?gene=CDKL5</a>     |
| AOC1    | Amine Oxidase Copper Containing 1                                      | Protein Coding | 49 | GC07P150824 | 4.807901382 | <a href="https://www.genecards.org/cgi-bin/carddisp.pl?gene=AOC1">https://www.genecards.org/cgi-bin/carddisp.pl?gene=AOC1</a>       |
| GRIN1   | Glutamate Ionotropic Receptor NMDA Type Subunit 1                      | Protein Coding | 57 | GC09P137184 | 4.80106926  | <a href="https://www.genecards.org/cgi-bin/carddisp.pl?gene=GRIN1">https://www.genecards.org/cgi-bin/carddisp.pl?gene=GRIN1</a>     |
| FUT2    | Fucosyltransferase 2                                                   | Protein Coding | 52 | GC19P048695 | 4.799116611 | <a href="https://www.genecards.org/cgi-bin/carddisp.pl?gene=FUT2">https://www.genecards.org/cgi-bin/carddisp.pl?gene=FUT2</a>       |
| SLCO1B3 | Solute Carrier Organic Anion Transporter Family Member 1B3             | Protein Coding | 51 | GC12P020810 | 4.793128967 | <a href="https://www.genecards.org/cgi-bin/carddisp.pl?gene=SLCO1B3">https://www.genecards.org/cgi-bin/carddisp.pl?gene=SLCO1B3</a> |
| TACR1   | Tachykinin Receptor 1                                                  | Protein Coding | 51 | GC02M075203 | 4.782237053 | <a href="https://www.genecards.org/cgi-bin/carddisp.pl?gene=TACR1">https://www.genecards.org/cgi-bin/carddisp.pl?gene=TACR1</a>     |
| PIK3CD  | Phosphatidylinositol-4,5-Bisphosphate 3-Kinase Catalytic Subunit Delta | Protein Coding | 60 | GC01P009628 | 4.779503822 | <a href="https://www.genecards.org/cgi-bin/carddisp.pl?gene=PIK3CD">https://www.genecards.org/cgi-bin/carddisp.pl?gene=PIK3CD</a>   |

|         |                                                      |                |    |             |             |                                                                                                                                     |
|---------|------------------------------------------------------|----------------|----|-------------|-------------|-------------------------------------------------------------------------------------------------------------------------------------|
| AIRE    | Autoimmune Regulator                                 | Protein Coding | 50 | GC21P044285 | 4.776328087 | <a href="https://www.genecards.org/cgi-bin/carddisp.pl?gene=AIRE">https://www.genecards.org/cgi-bin/carddisp.pl?gene=AIRE</a>       |
| ACSM2B  | Acyl-CoA Synthetase Medium Chain Family Member 2B    | Protein Coding | 40 | GC16M020547 | 4.77520895  | <a href="https://www.genecards.org/cgi-bin/carddisp.pl?gene=ACSM2B">https://www.genecards.org/cgi-bin/carddisp.pl?gene=ACSM2B</a>   |
| ATOX1   | Antioxidant 1 Copper Chaperone                       | Protein Coding | 46 | GC05M151743 | 4.772132397 | <a href="https://www.genecards.org/cgi-bin/carddisp.pl?gene=ATOX1">https://www.genecards.org/cgi-bin/carddisp.pl?gene=ATOX1</a>     |
| LCN2    | Lipocalin 2                                          | Protein Coding | 52 | GC09P128149 | 4.771922112 | <a href="https://www.genecards.org/cgi-bin/carddisp.pl?gene=LCN2">https://www.genecards.org/cgi-bin/carddisp.pl?gene=LCN2</a>       |
| HSD17B2 | Hydroxysteroid 17-Beta Dehydrogenase 2               | Protein Coding | 50 | GC16P082068 | 4.765637875 | <a href="https://www.genecards.org/cgi-bin/carddisp.pl?gene=HSD17B2">https://www.genecards.org/cgi-bin/carddisp.pl?gene=HSD17B2</a> |
| ACP1    | Acid Phosphatase 1                                   | Protein Coding | 50 | GC02P000402 | 4.764500618 | <a href="https://www.genecards.org/cgi-bin/carddisp.pl?gene=ACP1">https://www.genecards.org/cgi-bin/carddisp.pl?gene=ACP1</a>       |
| HSD17B7 | Hydroxysteroid 17-Beta Dehydrogenase 7               | Protein Coding | 50 | GC01P162790 | 4.741034031 | <a href="https://www.genecards.org/cgi-bin/carddisp.pl?gene=HSD17B7">https://www.genecards.org/cgi-bin/carddisp.pl?gene=HSD17B7</a> |
| CDK1    | Cyclin Dependent Kinase 1                            | Protein Coding | 54 | GC10P060772 | 4.737948895 | <a href="https://www.genecards.org/cgi-bin/carddisp.pl?gene=CDK1">https://www.genecards.org/cgi-bin/carddisp.pl?gene=CDK1</a>       |
| ANGPT2  | Angiopoietin 2                                       | Protein Coding | 55 | GC08M006499 | 4.737078667 | <a href="https://www.genecards.org/cgi-bin/carddisp.pl?gene=ANGPT2">https://www.genecards.org/cgi-bin/carddisp.pl?gene=ANGPT2</a>   |
| HSPB1   | Heat Shock Protein Family B (Small) Member 1         | Protein Coding | 59 | GC07P076302 | 4.732555866 | <a href="https://www.genecards.org/cgi-bin/carddisp.pl?gene=HSPB1">https://www.genecards.org/cgi-bin/carddisp.pl?gene=HSPB1</a>     |
| SAT1    | Spermidine/Spermine N1-Acetyltransferase 1           | Protein Coding | 51 | GC0XP023784 | 4.724458218 | <a href="https://www.genecards.org/cgi-bin/carddisp.pl?gene=SAT1">https://www.genecards.org/cgi-bin/carddisp.pl?gene=SAT1</a>       |
| HSPA8   | Heat Shock Protein Family A (Hsp70) Member 8         | Protein Coding | 56 | GC11M123057 | 4.723155022 | <a href="https://www.genecards.org/cgi-bin/carddisp.pl?gene=HSPA8">https://www.genecards.org/cgi-bin/carddisp.pl?gene=HSPA8</a>     |
| TXNRD2  | Thioredoxin Reductase 2                              | Protein Coding | 51 | GC22M019863 | 4.720499992 | <a href="https://www.genecards.org/cgi-bin/carddisp.pl?gene=TXNRD2">https://www.genecards.org/cgi-bin/carddisp.pl?gene=TXNRD2</a>   |
| KCNQ1   | Potassium Voltage-Gated Channel Subfamily Q Member 1 | Protein Coding | 57 | GC11P002444 | 4.712696552 | <a href="https://www.genecards.org/cgi-bin/carddisp.pl?gene=KCNQ1">https://www.genecards.org/cgi-bin/carddisp.pl?gene=KCNQ1</a>     |
| HDC     | Histidine Decarboxylase                              | Protein Coding | 51 | GC15M050241 | 4.712660789 | <a href="https://www.genecards.org/cgi-bin/carddisp.pl?gene=HDC">https://www.genecards.org/cgi-bin/carddisp.pl?gene=HDC</a>         |

|         |                                                            |                |    |             |             |                                                                                                                                     |
|---------|------------------------------------------------------------|----------------|----|-------------|-------------|-------------------------------------------------------------------------------------------------------------------------------------|
| GRIN2B  | Glutamate Ionotropic Receptor NMDA Type Subunit 2B         | Protein Coding | 59 | GC12M013437 | 4.70554781  | <a href="https://www.genecards.org/cgi-bin/carddisp.pl?gene=GRIN2B">https://www.genecards.org/cgi-bin/carddisp.pl?gene=GRIN2B</a>   |
| ACE2    | Angiotensin Converting Enzyme 2                            | Protein Coding | 56 | GC0XM015494 | 4.698474884 | <a href="https://www.genecards.org/cgi-bin/carddisp.pl?gene=ACE2">https://www.genecards.org/cgi-bin/carddisp.pl?gene=ACE2</a>       |
| RAF1    | Raf-1 Proto-Oncogene, Serine/Threonine Kinase              | Protein Coding | 61 | GC03M012583 | 4.69260931  | <a href="https://www.genecards.org/cgi-bin/carddisp.pl?gene=RAF1">https://www.genecards.org/cgi-bin/carddisp.pl?gene=RAF1</a>       |
| NTRK2   | Neurotrophic Receptor Tyrosine Kinase 2                    | Protein Coding | 60 | GC09P084668 | 4.689634323 | <a href="https://www.genecards.org/cgi-bin/carddisp.pl?gene=NTRK2">https://www.genecards.org/cgi-bin/carddisp.pl?gene=NTRK2</a>     |
| TIMM8A  | Translocase Of Inner Mitochondrial Membrane 8A             | Protein Coding | 48 | GC0XM101345 | 4.683206081 | <a href="https://www.genecards.org/cgi-bin/carddisp.pl?gene=TIMM8A">https://www.genecards.org/cgi-bin/carddisp.pl?gene=TIMM8A</a>   |
| DNAH8   | Dynein Axonemal Heavy Chain 8                              | Protein Coding | 44 | GC06P092313 | 4.681497574 | <a href="https://www.genecards.org/cgi-bin/carddisp.pl?gene=DNAH8">https://www.genecards.org/cgi-bin/carddisp.pl?gene=DNAH8</a>     |
| CROT    | Carnitine O-Octanoyltransferase                            | Protein Coding | 46 | GC07P087369 | 4.68108654  | <a href="https://www.genecards.org/cgi-bin/carddisp.pl?gene=CROT">https://www.genecards.org/cgi-bin/carddisp.pl?gene=CROT</a>       |
| YAP1    | Yes1 Associated Transcriptional Regulator                  | Protein Coding | 55 | GC11P102110 | 4.661038876 | <a href="https://www.genecards.org/cgi-bin/carddisp.pl?gene=YAP1">https://www.genecards.org/cgi-bin/carddisp.pl?gene=YAP1</a>       |
| LPCAT1  | Lysophosphatidylcholine Acyltransferase 1                  | Protein Coding | 42 | GC05M001456 | 4.657835007 | <a href="https://www.genecards.org/cgi-bin/carddisp.pl?gene=LPCAT1">https://www.genecards.org/cgi-bin/carddisp.pl?gene=LPCAT1</a>   |
| IL7     | Interleukin 7                                              | Protein Coding | 50 | GC08M078689 | 4.655595779 | <a href="https://www.genecards.org/cgi-bin/carddisp.pl?gene=IL7">https://www.genecards.org/cgi-bin/carddisp.pl?gene=IL7</a>         |
| ANGPT1  | Angiopoietin 1                                             | Protein Coding | 53 | GC08M107246 | 4.639920712 | <a href="https://www.genecards.org/cgi-bin/carddisp.pl?gene=ANGPT1">https://www.genecards.org/cgi-bin/carddisp.pl?gene=ANGPT1</a>   |
| SFTPD   | Surfactant Protein D                                       | Protein Coding | 51 | GC10M079937 | 4.638412476 | <a href="https://www.genecards.org/cgi-bin/carddisp.pl?gene=SFTPD">https://www.genecards.org/cgi-bin/carddisp.pl?gene=SFTPD</a>     |
| SLCO1A2 | Solute Carrier Organic Anion Transporter Family Member 1A2 | Protein Coding | 44 | GC12M021264 | 4.631290436 | <a href="https://www.genecards.org/cgi-bin/carddisp.pl?gene=SLCO1A2">https://www.genecards.org/cgi-bin/carddisp.pl?gene=SLCO1A2</a> |
| ELOVL2  | ELOVL Fatty Acid Elongase 2                                | Protein Coding | 45 | GC06M010980 | 4.627637386 | <a href="https://www.genecards.org/cgi-bin/carddisp.pl?gene=ELOVL2">https://www.genecards.org/cgi-bin/carddisp.pl?gene=ELOVL2</a>   |
| HSPA4   | Heat Shock Protein Family A (Hsp70) Member 4               | Protein Coding | 49 | GC05P133054 | 4.618183136 | <a href="https://www.genecards.org/cgi-bin/carddisp.pl?gene=HSPA4">https://www.genecards.org/cgi-bin/carddisp.pl?gene=HSPA4</a>     |

|         |                                                      |                |    |             |             |                                                                                                                                     |
|---------|------------------------------------------------------|----------------|----|-------------|-------------|-------------------------------------------------------------------------------------------------------------------------------------|
| CSNK2A1 | Casein Kinase 2 Alpha 1                              | Protein Coding | 57 | GC20M000472 | 4.617533207 | <a href="https://www.genecards.org/cgi-bin/carddisp.pl?gene=CSNK2A1">https://www.genecards.org/cgi-bin/carddisp.pl?gene=CSNK2A1</a> |
| SLC4A4  | Solute Carrier Family 4 Member 4                     | Protein Coding | 53 | GC04P071063 | 4.614068985 | <a href="https://www.genecards.org/cgi-bin/carddisp.pl?gene=SLC4A4">https://www.genecards.org/cgi-bin/carddisp.pl?gene=SLC4A4</a>   |
| CNDP1   | Carnosine Dipeptidase 1                              | Protein Coding | 50 | GC18P074534 | 4.612370491 | <a href="https://www.genecards.org/cgi-bin/carddisp.pl?gene=CNDP1">https://www.genecards.org/cgi-bin/carddisp.pl?gene=CNDP1</a>     |
| LTA4H   | Leukotriene A4 Hydrolase                             | Protein Coding | 53 | GC12M096000 | 4.609683037 | <a href="https://www.genecards.org/cgi-bin/carddisp.pl?gene=LTA4H">https://www.genecards.org/cgi-bin/carddisp.pl?gene=LTA4H</a>     |
| CHGA    | Chromogranin A                                       | Protein Coding | 50 | GC14P092950 | 4.607313633 | <a href="https://www.genecards.org/cgi-bin/carddisp.pl?gene=CHGA">https://www.genecards.org/cgi-bin/carddisp.pl?gene=CHGA</a>       |
| KCNH2   | Potassium Voltage-Gated Channel Subfamily H Member 2 | Protein Coding | 57 | GC07M150944 | 4.600515842 | <a href="https://www.genecards.org/cgi-bin/carddisp.pl?gene=KCNH2">https://www.genecards.org/cgi-bin/carddisp.pl?gene=KCNH2</a>     |
| CYBA    | Cytochrome B-245 Alpha Chain                         | Protein Coding | 54 | GC16M088643 | 4.597821712 | <a href="https://www.genecards.org/cgi-bin/carddisp.pl?gene=CYBA">https://www.genecards.org/cgi-bin/carddisp.pl?gene=CYBA</a>       |
| ACSM2A  | Acyl-CoA Synthetase Medium Chain Family Member 2A    | Protein Coding | 39 | GC16P020463 | 4.596745014 | <a href="https://www.genecards.org/cgi-bin/carddisp.pl?gene=ACSM2A">https://www.genecards.org/cgi-bin/carddisp.pl?gene=ACSM2A</a>   |
| PTGES   | Prostaglandin E Synthase                             | Protein Coding | 48 | GC09M129738 | 4.596619606 | <a href="https://www.genecards.org/cgi-bin/carddisp.pl?gene=PTGES">https://www.genecards.org/cgi-bin/carddisp.pl?gene=PTGES</a>     |
| TFAP2A  | Transcription Factor AP-2 Alpha                      | Protein Coding | 53 | GC06M010393 | 4.594346046 | <a href="https://www.genecards.org/cgi-bin/carddisp.pl?gene=TFAP2A">https://www.genecards.org/cgi-bin/carddisp.pl?gene=TFAP2A</a>   |
| SLC6A14 | Solute Carrier Family 6 Member 14                    | Protein Coding | 48 | GC0XP116436 | 4.591845036 | <a href="https://www.genecards.org/cgi-bin/carddisp.pl?gene=SLC6A14">https://www.genecards.org/cgi-bin/carddisp.pl?gene=SLC6A14</a> |
| HTR2C   | 5-Hydroxytryptamine Receptor 2C                      | Protein Coding | 52 | GC0XP114584 | 4.588009834 | <a href="https://www.genecards.org/cgi-bin/carddisp.pl?gene=HTR2C">https://www.genecards.org/cgi-bin/carddisp.pl?gene=HTR2C</a>     |
| PRMT1   | Protein Arginine Methyltransferase 1                 | Protein Coding | 55 | GC19P049675 | 4.583292007 | <a href="https://www.genecards.org/cgi-bin/carddisp.pl?gene=PRMT1">https://www.genecards.org/cgi-bin/carddisp.pl?gene=PRMT1</a>     |
| CAMK2G  | Calcium/Calmodulin Dependent Protein Kinase II Gamma | Protein Coding | 54 | GC10M073812 | 4.57988739  | <a href="https://www.genecards.org/cgi-bin/carddisp.pl?gene=CAMK2G">https://www.genecards.org/cgi-bin/carddisp.pl?gene=CAMK2G</a>   |
| HSPD1   | Heat Shock Protein Family D (Hsp60) Member 1         | Protein Coding | 55 | GC02M197486 | 4.576894283 | <a href="https://www.genecards.org/cgi-bin/carddisp.pl?gene=HSPD1">https://www.genecards.org/cgi-bin/carddisp.pl?gene=HSPD1</a>     |

|         |                                                      |                |    |             |             |                                                                                                                                     |
|---------|------------------------------------------------------|----------------|----|-------------|-------------|-------------------------------------------------------------------------------------------------------------------------------------|
| SLC7A11 | Solute Carrier Family 7 Member 11                    | Protein Coding | 51 | GC04M138164 | 4.569381237 | <a href="https://www.genecards.org/cgi-bin/carddisp.pl?gene=SLC7A11">https://www.genecards.org/cgi-bin/carddisp.pl?gene=SLC7A11</a> |
| NCOA1   | Nuclear Receptor Coactivator 1                       | Protein Coding | 51 | GC02P024492 | 4.565952778 | <a href="https://www.genecards.org/cgi-bin/carddisp.pl?gene=NCOA1">https://www.genecards.org/cgi-bin/carddisp.pl?gene=NCOA1</a>     |
| SLC6A4  | Solute Carrier Family 6 Member 4                     | Protein Coding | 55 | GC17M030194 | 4.565765858 | <a href="https://www.genecards.org/cgi-bin/carddisp.pl?gene=SLC6A4">https://www.genecards.org/cgi-bin/carddisp.pl?gene=SLC6A4</a>   |
| SMN1    | Survival Of Motor Neuron 1, Telomeric                | Protein Coding | 47 | GC05P070924 | 4.564593792 | <a href="https://www.genecards.org/cgi-bin/carddisp.pl?gene=SMN1">https://www.genecards.org/cgi-bin/carddisp.pl?gene=SMN1</a>       |
| TLR2    | Toll Like Receptor 2                                 | Protein Coding | 59 | GC04P153684 | 4.562651634 | <a href="https://www.genecards.org/cgi-bin/carddisp.pl?gene=TLR2">https://www.genecards.org/cgi-bin/carddisp.pl?gene=TLR2</a>       |
| P2RX7   | Purinergic Receptor P2X 7                            | Protein Coding | 54 | GC12P126979 | 4.556344986 | <a href="https://www.genecards.org/cgi-bin/carddisp.pl?gene=P2RX7">https://www.genecards.org/cgi-bin/carddisp.pl?gene=P2RX7</a>     |
| RHOA    | Ras Homolog Family Member A                          | Protein Coding | 57 | GC03M049359 | 4.555493832 | <a href="https://www.genecards.org/cgi-bin/carddisp.pl?gene=RHOA">https://www.genecards.org/cgi-bin/carddisp.pl?gene=RHOA</a>       |
| MLH1    | MutL Homolog 1                                       | Protein Coding | 55 | GC03P036993 | 4.549809933 | <a href="https://www.genecards.org/cgi-bin/carddisp.pl?gene=MLH1">https://www.genecards.org/cgi-bin/carddisp.pl?gene=MLH1</a>       |
| ADRB1   | Adrenoceptor Beta 1                                  | Protein Coding | 54 | GC10P114044 | 4.549460411 | <a href="https://www.genecards.org/cgi-bin/carddisp.pl?gene=ADRB1">https://www.genecards.org/cgi-bin/carddisp.pl?gene=ADRB1</a>     |
| TIMP2   | TIMP Metalloproteinase Inhibitor 2                   | Protein Coding | 48 | GC17M078852 | 4.54147768  | <a href="https://www.genecards.org/cgi-bin/carddisp.pl?gene=TIMP2">https://www.genecards.org/cgi-bin/carddisp.pl?gene=TIMP2</a>     |
| DBI     | Diazepam Binding Inhibitor, Acyl-CoA Binding Protein | Protein Coding | 51 | GC02P119366 | 4.539021969 | <a href="https://www.genecards.org/cgi-bin/carddisp.pl?gene=DBI">https://www.genecards.org/cgi-bin/carddisp.pl?gene=DBI</a>         |
| CDH1    | Cadherin 1                                           | Protein Coding | 56 | GC16P068737 | 4.532455921 | <a href="https://www.genecards.org/cgi-bin/carddisp.pl?gene=CDH1">https://www.genecards.org/cgi-bin/carddisp.pl?gene=CDH1</a>       |
| CDKN2B  | Cyclin Dependent Kinase Inhibitor 2B                 | Protein Coding | 53 | GC09M022002 | 4.53066206  | <a href="https://www.genecards.org/cgi-bin/carddisp.pl?gene=CDKN2B">https://www.genecards.org/cgi-bin/carddisp.pl?gene=CDKN2B</a>   |
| PLCD1   | Phospholipase C Delta 1                              | Protein Coding | 55 | GC03M038008 | 4.52986908  | <a href="https://www.genecards.org/cgi-bin/carddisp.pl?gene=PLCD1">https://www.genecards.org/cgi-bin/carddisp.pl?gene=PLCD1</a>     |
| CYSLTR1 | Cysteinyl Leukotriene Receptor 1                     | Protein Coding | 50 | GC0XM078271 | 4.527486801 | <a href="https://www.genecards.org/cgi-bin/carddisp.pl?gene=CYSLTR1">https://www.genecards.org/cgi-bin/carddisp.pl?gene=CYSLTR1</a> |

|        |                                                       |                |    |             |             |                                                                                                                                   |
|--------|-------------------------------------------------------|----------------|----|-------------|-------------|-----------------------------------------------------------------------------------------------------------------------------------|
| SPTLC2 | Serine Palmitoyltransferase Long Chain Base Subunit 2 | Protein Coding | 54 | GC14M077505 | 4.527154922 | <a href="https://www.genecards.org/cgi-bin/carddisp.pl?gene=SPTLC2">https://www.genecards.org/cgi-bin/carddisp.pl?gene=SPTLC2</a> |
| ARAF   | A-Raf Proto-Oncogene, Serine/Threonine Kinase         | Protein Coding | 53 | GC0XP047710 | 4.521902084 | <a href="https://www.genecards.org/cgi-bin/carddisp.pl?gene=ARAF">https://www.genecards.org/cgi-bin/carddisp.pl?gene=ARAF</a>     |
| DGKQ   | Diacylglycerol Kinase Theta                           | Protein Coding | 48 | GC04M000958 | 4.516810894 | <a href="https://www.genecards.org/cgi-bin/carddisp.pl?gene=DGKQ">https://www.genecards.org/cgi-bin/carddisp.pl?gene=DGKQ</a>     |
| ACAA1  | Acetyl-CoA Acyltransferase 1                          | Protein Coding | 48 | GC03M038103 | 4.513883114 | <a href="https://www.genecards.org/cgi-bin/carddisp.pl?gene=ACAA1">https://www.genecards.org/cgi-bin/carddisp.pl?gene=ACAA1</a>   |
| BLVRA  | Biliverdin Reductase A                                | Protein Coding | 51 | GC07P043758 | 4.509799004 | <a href="https://www.genecards.org/cgi-bin/carddisp.pl?gene=BLVRA">https://www.genecards.org/cgi-bin/carddisp.pl?gene=BLVRA</a>   |
| RPA1   | Replication Protein A1                                | Protein Coding | 53 | GC17P001829 | 4.499402523 | <a href="https://www.genecards.org/cgi-bin/carddisp.pl?gene=RPA1">https://www.genecards.org/cgi-bin/carddisp.pl?gene=RPA1</a>     |
| CDKN1A | Cyclin Dependent Kinase Inhibitor 1A                  | Protein Coding | 55 | GC06P092294 | 4.492255211 | <a href="https://www.genecards.org/cgi-bin/carddisp.pl?gene=CDKN1A">https://www.genecards.org/cgi-bin/carddisp.pl?gene=CDKN1A</a> |
| LTF    | Lactotransferrin                                      | Protein Coding | 52 | GC03M046435 | 4.481446266 | <a href="https://www.genecards.org/cgi-bin/carddisp.pl?gene=LTF">https://www.genecards.org/cgi-bin/carddisp.pl?gene=LTF</a>       |
| SOCS3  | Suppressor Of Cytokine Signaling 3                    | Protein Coding | 50 | GC17M078356 | 4.479187489 | <a href="https://www.genecards.org/cgi-bin/carddisp.pl?gene=SOCS3">https://www.genecards.org/cgi-bin/carddisp.pl?gene=SOCS3</a>   |
| COL2A1 | Collagen Type II Alpha 1 Chain                        | Protein Coding | 56 | GC12M047972 | 4.477406502 | <a href="https://www.genecards.org/cgi-bin/carddisp.pl?gene=COL2A1">https://www.genecards.org/cgi-bin/carddisp.pl?gene=COL2A1</a> |
| WT1    | WT1 Transcription Factor                              | Protein Coding | 55 | GC11M032365 | 4.475149155 | <a href="https://www.genecards.org/cgi-bin/carddisp.pl?gene=WT1">https://www.genecards.org/cgi-bin/carddisp.pl?gene=WT1</a>       |
| LDHB   | Lactate Dehydrogenase B                               | Protein Coding | 53 | GC12M021635 | 4.47364521  | <a href="https://www.genecards.org/cgi-bin/carddisp.pl?gene=LDHB">https://www.genecards.org/cgi-bin/carddisp.pl?gene=LDHB</a>     |
| ACSBG1 | Acyl-CoA Synthetase Bubblegum Family Member 1         | Protein Coding | 48 | GC15M078167 | 4.471997738 | <a href="https://www.genecards.org/cgi-bin/carddisp.pl?gene=ACSBG1">https://www.genecards.org/cgi-bin/carddisp.pl?gene=ACSBG1</a> |
| SNAP25 | Synaptosome Associated Protein 25                     | Protein Coding | 55 | GC20P010193 | 4.466922283 | <a href="https://www.genecards.org/cgi-bin/carddisp.pl?gene=SNAP25">https://www.genecards.org/cgi-bin/carddisp.pl?gene=SNAP25</a> |
| NME1   | NME/NM23 Nucleoside Diphosphate Kinase 1              | Protein Coding | 51 | GC17P062974 | 4.462903023 | <a href="https://www.genecards.org/cgi-bin/carddisp.pl?gene=NME1">https://www.genecards.org/cgi-bin/carddisp.pl?gene=NME1</a>     |

|        |                                                               |                |    |             |             |                                                                                                                                   |
|--------|---------------------------------------------------------------|----------------|----|-------------|-------------|-----------------------------------------------------------------------------------------------------------------------------------|
| ADRA2A | Adrenoceptor Alpha 2A                                         | Protein Coding | 52 | GC10P111077 | 4.449795246 | <a href="https://www.genecards.org/cgi-bin/carddisp.pl?gene=ADRA2A">https://www.genecards.org/cgi-bin/carddisp.pl?gene=ADRA2A</a> |
| DYRK1A | Dual Specificity Tyrosine Phosphorylation Regulated Kinase 1A | Protein Coding | 57 | GC21P037365 | 4.449550152 | <a href="https://www.genecards.org/cgi-bin/carddisp.pl?gene=DYRK1A">https://www.genecards.org/cgi-bin/carddisp.pl?gene=DYRK1A</a> |
| FASLG  | Fas Ligand                                                    | Protein Coding | 55 | GC01P172628 | 4.443905354 | <a href="https://www.genecards.org/cgi-bin/carddisp.pl?gene=FASLG">https://www.genecards.org/cgi-bin/carddisp.pl?gene=FASLG</a>   |
| ACSL3  | Acyl-CoA Synthetase Long Chain Family Member 3                | Protein Coding | 49 | GC02P222860 | 4.439405918 | <a href="https://www.genecards.org/cgi-bin/carddisp.pl?gene=ACSL3">https://www.genecards.org/cgi-bin/carddisp.pl?gene=ACSL3</a>   |
| AGER   | Advanced Glycosylation End-Product Specific Receptor          | Protein Coding | 53 | GC06M032180 | 4.438507557 | <a href="https://www.genecards.org/cgi-bin/carddisp.pl?gene=AGER">https://www.genecards.org/cgi-bin/carddisp.pl?gene=AGER</a>     |
| CXCR4  | C-X-C Motif Chemokine Receptor 4                              | Protein Coding | 59 | GC02M136114 | 4.436937332 | <a href="https://www.genecards.org/cgi-bin/carddisp.pl?gene=CXCR4">https://www.genecards.org/cgi-bin/carddisp.pl?gene=CXCR4</a>   |
| CBL    | Cbl Proto-Oncogene                                            | Protein Coding | 59 | GC11P119206 | 4.430374146 | <a href="https://www.genecards.org/cgi-bin/carddisp.pl?gene=CBL">https://www.genecards.org/cgi-bin/carddisp.pl?gene=CBL</a>       |
| THBS1  | Thrombospondin 1                                              | Protein Coding | 52 | GC15P039581 | 4.425669193 | <a href="https://www.genecards.org/cgi-bin/carddisp.pl?gene=THBS1">https://www.genecards.org/cgi-bin/carddisp.pl?gene=THBS1</a>   |
| IFNA1  | Interferon Alpha 1                                            | Protein Coding | 45 | GC09P021611 | 4.422715187 | <a href="https://www.genecards.org/cgi-bin/carddisp.pl?gene=IFNA1">https://www.genecards.org/cgi-bin/carddisp.pl?gene=IFNA1</a>   |
| SRR    | Serine Racemase                                               | Protein Coding | 48 | GC17P002303 | 4.418429375 | <a href="https://www.genecards.org/cgi-bin/carddisp.pl?gene=SRR">https://www.genecards.org/cgi-bin/carddisp.pl?gene=SRR</a>       |
| ADPRH  | ADP-Ribosylarginine Hydrolase                                 | Protein Coding | 42 | GC03P119579 | 4.417760849 | <a href="https://www.genecards.org/cgi-bin/carddisp.pl?gene=ADPRH">https://www.genecards.org/cgi-bin/carddisp.pl?gene=ADPRH</a>   |
| CCN2   | Cellular Communication Network Factor 2                       | Protein Coding | 53 | GC06M131948 | 4.404472828 | <a href="https://www.genecards.org/cgi-bin/carddisp.pl?gene=CCN2">https://www.genecards.org/cgi-bin/carddisp.pl?gene=CCN2</a>     |
| TGFA   | Transforming Growth Factor Alpha                              | Protein Coding | 53 | GC02M070447 | 4.400311947 | <a href="https://www.genecards.org/cgi-bin/carddisp.pl?gene=TGFA">https://www.genecards.org/cgi-bin/carddisp.pl?gene=TGFA</a>     |
| PAX5   | Paired Box 5                                                  | Protein Coding | 52 | GC09M036879 | 4.399440765 | <a href="https://www.genecards.org/cgi-bin/carddisp.pl?gene=PAX5">https://www.genecards.org/cgi-bin/carddisp.pl?gene=PAX5</a>     |
| RUNX1  | RUNX Family Transcription Factor 1                            | Protein Coding | 56 | GC21M034787 | 4.396518707 | <a href="https://www.genecards.org/cgi-bin/carddisp.pl?gene=RUNX1">https://www.genecards.org/cgi-bin/carddisp.pl?gene=RUNX1</a>   |

|         |                                            |                |    |             |             |                                                                                                                                     |
|---------|--------------------------------------------|----------------|----|-------------|-------------|-------------------------------------------------------------------------------------------------------------------------------------|
| ENG     | Endoglin                                   | Protein Coding | 55 | GC09M127815 | 4.393945217 | <a href="https://www.genecards.org/cgi-bin/carddisp.pl?gene=ENG">https://www.genecards.org/cgi-bin/carddisp.pl?gene=ENG</a>         |
| PDGFB   | Platelet Derived Growth Factor Subunit B   | Protein Coding | 58 | GC22M062326 | 4.381302357 | <a href="https://www.genecards.org/cgi-bin/carddisp.pl?gene=PDGFB">https://www.genecards.org/cgi-bin/carddisp.pl?gene=PDGFB</a>     |
| EDNRA   | Endothelin Receptor Type A                 | Protein Coding | 56 | GC04P147480 | 4.378360271 | <a href="https://www.genecards.org/cgi-bin/carddisp.pl?gene=EDNRA">https://www.genecards.org/cgi-bin/carddisp.pl?gene=EDNRA</a>     |
| SLC27A2 | Solute Carrier Family 27 Member 2          | Protein Coding | 52 | GC15P050182 | 4.3697896   | <a href="https://www.genecards.org/cgi-bin/carddisp.pl?gene=SLC27A2">https://www.genecards.org/cgi-bin/carddisp.pl?gene=SLC27A2</a> |
| NCOA3   | Nuclear Receptor Coactivator 3             | Protein Coding | 54 | GC20P047501 | 4.368255615 | <a href="https://www.genecards.org/cgi-bin/carddisp.pl?gene=NCOA3">https://www.genecards.org/cgi-bin/carddisp.pl?gene=NCOA3</a>     |
| CDK2    | Cyclin Dependent Kinase 2                  | Protein Coding | 58 | GC12P055966 | 4.363362789 | <a href="https://www.genecards.org/cgi-bin/carddisp.pl?gene=CDK2">https://www.genecards.org/cgi-bin/carddisp.pl?gene=CDK2</a>       |
| GAL     | Galanin And GMAP Prepropeptide             | Protein Coding | 51 | GC11P071097 | 4.357871056 | <a href="https://www.genecards.org/cgi-bin/carddisp.pl?gene=GAL">https://www.genecards.org/cgi-bin/carddisp.pl?gene=GAL</a>         |
| PLCG2   | Phospholipase C Gamma 2                    | Protein Coding | 58 | GC16P081773 | 4.349803448 | <a href="https://www.genecards.org/cgi-bin/carddisp.pl?gene=PLCG2">https://www.genecards.org/cgi-bin/carddisp.pl?gene=PLCG2</a>     |
| LTA     | Lymphotoxin Alpha                          | Protein Coding | 49 | GC06P092152 | 4.348684311 | <a href="https://www.genecards.org/cgi-bin/carddisp.pl?gene=LTA">https://www.genecards.org/cgi-bin/carddisp.pl?gene=LTA</a>         |
| CLU     | Clusterin                                  | Protein Coding | 54 | GC08M027596 | 4.345746994 | <a href="https://www.genecards.org/cgi-bin/carddisp.pl?gene=CLU">https://www.genecards.org/cgi-bin/carddisp.pl?gene=CLU</a>         |
| MUC1    | Mucin 1, Cell Surface Associated           | Protein Coding | 55 | GC01M155185 | 4.336580753 | <a href="https://www.genecards.org/cgi-bin/carddisp.pl?gene=MUC1">https://www.genecards.org/cgi-bin/carddisp.pl?gene=MUC1</a>       |
| SMAD4   | SMAD Family Member 4                       | Protein Coding | 59 | GC18P051028 | 4.335887909 | <a href="https://www.genecards.org/cgi-bin/carddisp.pl?gene=SMAD4">https://www.genecards.org/cgi-bin/carddisp.pl?gene=SMAD4</a>     |
| FN1     | Fibronectin 1                              | Protein Coding | 57 | GC02M215360 | 4.331896305 | <a href="https://www.genecards.org/cgi-bin/carddisp.pl?gene=FN1">https://www.genecards.org/cgi-bin/carddisp.pl?gene=FN1</a>         |
| TGFBR1  | Transforming Growth Factor Beta Receptor 1 | Protein Coding | 61 | GC09P099104 | 4.330105305 | <a href="https://www.genecards.org/cgi-bin/carddisp.pl?gene=TGFBR1">https://www.genecards.org/cgi-bin/carddisp.pl?gene=TGFBR1</a>   |
| BSG     | Basigin (Ok Blood Group)                   | Protein Coding | 51 | GC19P000571 | 4.324801445 | <a href="https://www.genecards.org/cgi-bin/carddisp.pl?gene=BSG">https://www.genecards.org/cgi-bin/carddisp.pl?gene=BSG</a>         |

|         |                                                |                |    |             |             |                                                                                                                                       |
|---------|------------------------------------------------|----------------|----|-------------|-------------|---------------------------------------------------------------------------------------------------------------------------------------|
| RRM2    | Ribonucleotide Reductase Regulatory Subunit M2 | Protein Coding | 55 | GC02P010123 | 4.324131966 | <a href="https://www.genecards.org/cgi-bin/carddisp.pl?gene=RRM2">https://www.genecards.org/cgi-bin/carddisp.pl?gene=RRM2</a>         |
| PARK7   | Parkinsonism Associated Deglycase              | Protein Coding | 54 | GC01P008140 | 4.317549706 | <a href="https://www.genecards.org/cgi-bin/carddisp.pl?gene=PARK7">https://www.genecards.org/cgi-bin/carddisp.pl?gene=PARK7</a>       |
| TGFBR2  | Transforming Growth Factor Beta Receptor 2     | Protein Coding | 59 | GC03P030623 | 4.308754444 | <a href="https://www.genecards.org/cgi-bin/carddisp.pl?gene=TGFBR2">https://www.genecards.org/cgi-bin/carddisp.pl?gene=TGFBR2</a>     |
| HDAC2   | Histone Deacetylase 2                          | Protein Coding | 59 | GC06M113933 | 4.305524826 | <a href="https://www.genecards.org/cgi-bin/carddisp.pl?gene=HDAC2">https://www.genecards.org/cgi-bin/carddisp.pl?gene=HDAC2</a>       |
| PRNP    | Prion Protein                                  | Protein Coding | 55 | GC20P004686 | 4.301037312 | <a href="https://www.genecards.org/cgi-bin/carddisp.pl?gene=PRNP">https://www.genecards.org/cgi-bin/carddisp.pl?gene=PRNP</a>         |
| RRM1    | Ribonucleotide Reductase Catalytic Subunit M1  | Protein Coding | 56 | GC11P004115 | 4.299415112 | <a href="https://www.genecards.org/cgi-bin/carddisp.pl?gene=RRM1">https://www.genecards.org/cgi-bin/carddisp.pl?gene=RRM1</a>         |
| PRKCD   | Protein Kinase C Delta                         | Protein Coding | 59 | GC03P053156 | 4.297080994 | <a href="https://www.genecards.org/cgi-bin/carddisp.pl?gene=PRKCD">https://www.genecards.org/cgi-bin/carddisp.pl?gene=PRKCD</a>       |
| SLC26A4 | Solute Carrier Family 26 Member 4              | Protein Coding | 49 | GC07P107660 | 4.296963692 | <a href="https://www.genecards.org/cgi-bin/carddisp.pl?gene=SLC26A4">https://www.genecards.org/cgi-bin/carddisp.pl?gene=SLC26A4</a>   |
| PRDX5   | Peroxiredoxin 5                                | Protein Coding | 51 | GC11P064460 | 4.295131683 | <a href="https://www.genecards.org/cgi-bin/carddisp.pl?gene=PRDX5">https://www.genecards.org/cgi-bin/carddisp.pl?gene=PRDX5</a>       |
| SEMA4D  | Semaphorin 4D                                  | Protein Coding | 53 | GC09M089360 | 4.28213644  | <a href="https://www.genecards.org/cgi-bin/carddisp.pl?gene=SEMA4D">https://www.genecards.org/cgi-bin/carddisp.pl?gene=SEMA4D</a>     |
| NKX2-1  | NK2 Homeobox 1                                 | Protein Coding | 53 | GC14M036516 | 4.278104782 | <a href="https://www.genecards.org/cgi-bin/carddisp.pl?gene=NKX2-1">https://www.genecards.org/cgi-bin/carddisp.pl?gene=NKX2-1</a>     |
| NEU3    | Neuraminidase 3                                | Protein Coding | 45 | GC11P078455 | 4.275635242 | <a href="https://www.genecards.org/cgi-bin/carddisp.pl?gene=NEU3">https://www.genecards.org/cgi-bin/carddisp.pl?gene=NEU3</a>         |
| WRN     | WRN RecQ Like Helicase                         | Protein Coding | 53 | GC08P031033 | 4.274279118 | <a href="https://www.genecards.org/cgi-bin/carddisp.pl?gene=WRN">https://www.genecards.org/cgi-bin/carddisp.pl?gene=WRN</a>           |
| TBK1    | TANK Binding Kinase 1                          | Protein Coding | 56 | GC12P064451 | 4.270060539 | <a href="https://www.genecards.org/cgi-bin/carddisp.pl?gene=TBK1">https://www.genecards.org/cgi-bin/carddisp.pl?gene=TBK1</a>         |
| B4GALNT | Beta-1,4-N-Acetyl-Galactosaminyltransferase 1  | Protein Coding | 53 | GC12M057623 | 4.263757229 | <a href="https://www.genecards.org/cgi-bin/carddisp.pl?gene=B4GALNT1">https://www.genecards.org/cgi-bin/carddisp.pl?gene=B4GALNT1</a> |

|         |                                                           |                |    |             |             |                                                                                                                                     |
|---------|-----------------------------------------------------------|----------------|----|-------------|-------------|-------------------------------------------------------------------------------------------------------------------------------------|
| CD19    | CD19 Molecule                                             | Protein Coding | 58 | GC16P042650 | 4.263446808 | <a href="https://www.genecards.org/cgi-bin/carddisp.pl?gene=CD19">https://www.genecards.org/cgi-bin/carddisp.pl?gene=CD19</a>       |
| IKBKB   | Inhibitor Of Nuclear Factor Kappa B Kinase Subunit Beta   | Protein Coding | 61 | GC08P042271 | 4.261201859 | <a href="https://www.genecards.org/cgi-bin/carddisp.pl?gene=IKBKB">https://www.genecards.org/cgi-bin/carddisp.pl?gene=IKBKB</a>     |
| ACOT12  | Acyl-CoA Thioesterase 12                                  | Protein Coding | 44 | GC05M081309 | 4.259821892 | <a href="https://www.genecards.org/cgi-bin/carddisp.pl?gene=ACOT12">https://www.genecards.org/cgi-bin/carddisp.pl?gene=ACOT12</a>   |
| NRAS    | NRAS Proto-Oncogene, GTPase                               | Protein Coding | 57 | GC01M114704 | 4.258516312 | <a href="https://www.genecards.org/cgi-bin/carddisp.pl?gene=NRAS">https://www.genecards.org/cgi-bin/carddisp.pl?gene=NRAS</a>       |
| ABCD2   | ATP Binding Cassette Subfamily D Member 2                 | Protein Coding | 47 | GC12M039530 | 4.252993107 | <a href="https://www.genecards.org/cgi-bin/carddisp.pl?gene=ABCD2">https://www.genecards.org/cgi-bin/carddisp.pl?gene=ABCD2</a>     |
| FAR1    | Fatty Acyl-CoA Reductase 1                                | Protein Coding | 49 | GC11P013668 | 4.249789238 | <a href="https://www.genecards.org/cgi-bin/carddisp.pl?gene=FAR1">https://www.genecards.org/cgi-bin/carddisp.pl?gene=FAR1</a>       |
| SLC1A3  | Solute Carrier Family 1 Member 3                          | Protein Coding | 56 | GC05P036654 | 4.249479294 | <a href="https://www.genecards.org/cgi-bin/carddisp.pl?gene=SLC1A3">https://www.genecards.org/cgi-bin/carddisp.pl?gene=SLC1A3</a>   |
| PTK2B   | Protein Tyrosine Kinase 2 Beta                            | Protein Coding | 55 | GC08P027311 | 4.24893856  | <a href="https://www.genecards.org/cgi-bin/carddisp.pl?gene=PTK2B">https://www.genecards.org/cgi-bin/carddisp.pl?gene=PTK2B</a>     |
| PRKG1   | Protein Kinase CGMP-Dependent 1                           | Protein Coding | 57 | GC10P050991 | 4.246487141 | <a href="https://www.genecards.org/cgi-bin/carddisp.pl?gene=PRKG1">https://www.genecards.org/cgi-bin/carddisp.pl?gene=PRKG1</a>     |
| PIKFYVE | Phosphoinositide Kinase, FYVE-Type Zinc Finger Containing | Protein Coding | 55 | GC02P208266 | 4.238278866 | <a href="https://www.genecards.org/cgi-bin/carddisp.pl?gene=PIKFYVE">https://www.genecards.org/cgi-bin/carddisp.pl?gene=PIKFYVE</a> |
| NTRK1   | Neurotrophic Receptor Tyrosine Kinase 1                   | Protein Coding | 57 | GC01P156815 | 4.233635426 | <a href="https://www.genecards.org/cgi-bin/carddisp.pl?gene=NTRK1">https://www.genecards.org/cgi-bin/carddisp.pl?gene=NTRK1</a>     |
| PLAU    | Plasminogen Activator, Urokinase                          | Protein Coding | 59 | GC10P073909 | 4.2326684   | <a href="https://www.genecards.org/cgi-bin/carddisp.pl?gene=PLAU">https://www.genecards.org/cgi-bin/carddisp.pl?gene=PLAU</a>       |
| ITGAM   | Integrin Subunit Alpha M                                  | Protein Coding | 55 | GC16P042850 | 4.231232643 | <a href="https://www.genecards.org/cgi-bin/carddisp.pl?gene=ITGAM">https://www.genecards.org/cgi-bin/carddisp.pl?gene=ITGAM</a>     |
| HPX     | Hemopexin                                                 | Protein Coding | 48 | GC11M006939 | 4.224319935 | <a href="https://www.genecards.org/cgi-bin/carddisp.pl?gene=HPX">https://www.genecards.org/cgi-bin/carddisp.pl?gene=HPX</a>         |
| VIP     | Vasoactive Intestinal Peptide                             | Protein Coding | 51 | GC06P152750 | 4.223753452 | <a href="https://www.genecards.org/cgi-bin/carddisp.pl?gene=VIP">https://www.genecards.org/cgi-bin/carddisp.pl?gene=VIP</a>         |

|        |                                                                  |                |    |             |             |                                                                                                                                   |
|--------|------------------------------------------------------------------|----------------|----|-------------|-------------|-----------------------------------------------------------------------------------------------------------------------------------|
| SYNJ1  | Synaptojanin 1                                                   | Protein Coding | 52 | GC21M032628 | 4.215205193 | <a href="https://www.genecards.org/cgi-bin/carddisp.pl?gene=SYNJ1">https://www.genecards.org/cgi-bin/carddisp.pl?gene=SYNJ1</a>   |
| PRSS1  | Serine Protease 1                                                | Protein Coding | 51 | GC07P149953 | 4.214827061 | <a href="https://www.genecards.org/cgi-bin/carddisp.pl?gene=PRSS1">https://www.genecards.org/cgi-bin/carddisp.pl?gene=PRSS1</a>   |
| IDO2   | Indoleamine 2,3-Dioxygenase 2                                    | Protein Coding | 45 | GC08P039976 | 4.204556465 | <a href="https://www.genecards.org/cgi-bin/carddisp.pl?gene=IDO2">https://www.genecards.org/cgi-bin/carddisp.pl?gene=IDO2</a>     |
| OARD1  | O-Acyl-ADP-Ribose Deacylase 1                                    | Protein Coding | 39 | GC06M071913 | 4.190365314 | <a href="https://www.genecards.org/cgi-bin/carddisp.pl?gene=OARD1">https://www.genecards.org/cgi-bin/carddisp.pl?gene=OARD1</a>   |
| PSEN2  | Presenilin 2                                                     | Protein Coding | 56 | GC01P226870 | 4.188182831 | <a href="https://www.genecards.org/cgi-bin/carddisp.pl?gene=PSEN2">https://www.genecards.org/cgi-bin/carddisp.pl?gene=PSEN2</a>   |
| GPC3   | Glypican 3                                                       | Protein Coding | 53 | GC0XM133535 | 4.185760498 | <a href="https://www.genecards.org/cgi-bin/carddisp.pl?gene=GPC3">https://www.genecards.org/cgi-bin/carddisp.pl?gene=GPC3</a>     |
| HDAC3  | Histone Deacetylase 3                                            | Protein Coding | 56 | GC05M141620 | 4.183124065 | <a href="https://www.genecards.org/cgi-bin/carddisp.pl?gene=HDAC3">https://www.genecards.org/cgi-bin/carddisp.pl?gene=HDAC3</a>   |
| PTGES2 | Prostaglandin E Synthase 2                                       | Protein Coding | 50 | GC09M128120 | 4.17619276  | <a href="https://www.genecards.org/cgi-bin/carddisp.pl?gene=PTGES2">https://www.genecards.org/cgi-bin/carddisp.pl?gene=PTGES2</a> |
| PTPMT1 | Protein Tyrosine Phosphatase Mitochondrial 1                     | Protein Coding | 44 | GC11P047568 | 4.171000481 | <a href="https://www.genecards.org/cgi-bin/carddisp.pl?gene=PTPMT1">https://www.genecards.org/cgi-bin/carddisp.pl?gene=PTPMT1</a> |
| P4HB   | Prolyl 4-Hydroxylase Subunit Beta                                | Protein Coding | 56 | GC17M081843 | 4.170737743 | <a href="https://www.genecards.org/cgi-bin/carddisp.pl?gene=P4HB">https://www.genecards.org/cgi-bin/carddisp.pl?gene=P4HB</a>     |
| XK     | X-Linked Kx Blood Group Antigen, Kell And VPS13A Binding Protein | Protein Coding | 47 | GC0XP037685 | 4.168406487 | <a href="https://www.genecards.org/cgi-bin/carddisp.pl?gene=XK">https://www.genecards.org/cgi-bin/carddisp.pl?gene=XK</a>         |
| CDK4   | Cyclin Dependent Kinase 4                                        | Protein Coding | 61 | GC12M057787 | 4.165514946 | <a href="https://www.genecards.org/cgi-bin/carddisp.pl?gene=CDK4">https://www.genecards.org/cgi-bin/carddisp.pl?gene=CDK4</a>     |
| SPTLC3 | Serine Palmitoyltransferase Long Chain Base Subunit 3            | Protein Coding | 46 | GC20P013008 | 4.162569523 | <a href="https://www.genecards.org/cgi-bin/carddisp.pl?gene=SPTLC3">https://www.genecards.org/cgi-bin/carddisp.pl?gene=SPTLC3</a> |
| XPC    | XPC Complex Subunit, DNA Damage Recognition And Repair Factor    | Protein Coding | 52 | GC03M021831 | 4.16207695  | <a href="https://www.genecards.org/cgi-bin/carddisp.pl?gene=XPC">https://www.genecards.org/cgi-bin/carddisp.pl?gene=XPC</a>       |
| SLC1A1 | Solute Carrier Family 1 Member 1                                 | Protein Coding | 56 | GC09P004490 | 4.161443233 | <a href="https://www.genecards.org/cgi-bin/carddisp.pl?gene=SLC1A1">https://www.genecards.org/cgi-bin/carddisp.pl?gene=SLC1A1</a> |

|         |                                                                  |                |    |             |             |                                                                                                                                     |
|---------|------------------------------------------------------------------|----------------|----|-------------|-------------|-------------------------------------------------------------------------------------------------------------------------------------|
| OGT     | O-Linked N-Acetylglucosamine (GlcNAc) Transferase                | Protein Coding | 51 | GC0XP071534 | 4.159537315 | <a href="https://www.genecards.org/cgi-bin/carddisp.pl?gene=OGT">https://www.genecards.org/cgi-bin/carddisp.pl?gene=OGT</a>         |
| SMAD3   | SMAD Family Member 3                                             | Protein Coding | 59 | GC15P067063 | 4.158631802 | <a href="https://www.genecards.org/cgi-bin/carddisp.pl?gene=SMAD3">https://www.genecards.org/cgi-bin/carddisp.pl?gene=SMAD3</a>     |
| ELOVL1  | ELOVL Fatty Acid Elongase 1                                      | Protein Coding | 48 | GC01M043363 | 4.157157898 | <a href="https://www.genecards.org/cgi-bin/carddisp.pl?gene=ELOVL1">https://www.genecards.org/cgi-bin/carddisp.pl?gene=ELOVL1</a>   |
| TRPV4   | Transient Receptor Potential Cation Channel Subfamily V Member 4 | Protein Coding | 56 | GC12M109783 | 4.151106358 | <a href="https://www.genecards.org/cgi-bin/carddisp.pl?gene=TRPV4">https://www.genecards.org/cgi-bin/carddisp.pl?gene=TRPV4</a>     |
| GSTA2   | Glutathione S-Transferase Alpha 2                                | Protein Coding | 47 | GC06M052750 | 4.144515514 | <a href="https://www.genecards.org/cgi-bin/carddisp.pl?gene=GSTA2">https://www.genecards.org/cgi-bin/carddisp.pl?gene=GSTA2</a>     |
| M6PR    | Mannose-6-Phosphate Receptor, Cation Dependent                   | Protein Coding | 50 | GC12M009029 | 4.144075394 | <a href="https://www.genecards.org/cgi-bin/carddisp.pl?gene=M6PR">https://www.genecards.org/cgi-bin/carddisp.pl?gene=M6PR</a>       |
| SLCO2B1 | Solute Carrier Organic Anion Transporter Family Member 2B1       | Protein Coding | 51 | GC11P078457 | 4.143146515 | <a href="https://www.genecards.org/cgi-bin/carddisp.pl?gene=SLCO2B1">https://www.genecards.org/cgi-bin/carddisp.pl?gene=SLCO2B1</a> |
| ENO2    | Enolase 2                                                        | Protein Coding | 54 | GC12P006913 | 4.141520023 | <a href="https://www.genecards.org/cgi-bin/carddisp.pl?gene=ENO2">https://www.genecards.org/cgi-bin/carddisp.pl?gene=ENO2</a>       |
| CD40    | CD40 Molecule                                                    | Protein Coding | 57 | GC20P046118 | 4.141496658 | <a href="https://www.genecards.org/cgi-bin/carddisp.pl?gene=CD40">https://www.genecards.org/cgi-bin/carddisp.pl?gene=CD40</a>       |
| NAT8L   | N-Acetyltransferase 8 Like                                       | Protein Coding | 44 | GC04P002061 | 4.136281013 | <a href="https://www.genecards.org/cgi-bin/carddisp.pl?gene=NAT8L">https://www.genecards.org/cgi-bin/carddisp.pl?gene=NAT8L</a>     |
| CD8A    | CD8a Molecule                                                    | Protein Coding | 54 | GC02M086784 | 4.132395267 | <a href="https://www.genecards.org/cgi-bin/carddisp.pl?gene=CD8A">https://www.genecards.org/cgi-bin/carddisp.pl?gene=CD8A</a>       |
| FGF19   | Fibroblast Growth Factor 19                                      | Protein Coding | 49 | GC11M099882 | 4.129551411 | <a href="https://www.genecards.org/cgi-bin/carddisp.pl?gene=FGF19">https://www.genecards.org/cgi-bin/carddisp.pl?gene=FGF19</a>     |
| ACAA2   | Acetyl-CoA Acyltransferase 2                                     | Protein Coding | 51 | GC18M049782 | 4.127201557 | <a href="https://www.genecards.org/cgi-bin/carddisp.pl?gene=ACAA2">https://www.genecards.org/cgi-bin/carddisp.pl?gene=ACAA2</a>     |
| DCN     | Decorin                                                          | Protein Coding | 54 | GC12M091140 | 4.126251698 | <a href="https://www.genecards.org/cgi-bin/carddisp.pl?gene=DCN">https://www.genecards.org/cgi-bin/carddisp.pl?gene=DCN</a>         |
| XIAP    | X-Linked Inhibitor Of Apoptosis                                  | Protein Coding | 59 | GC0XP123859 | 4.12197876  | <a href="https://www.genecards.org/cgi-bin/carddisp.pl?gene=XIAP">https://www.genecards.org/cgi-bin/carddisp.pl?gene=XIAP</a>       |

|          |                                                    |                |    |             |             |                                                                                                                                       |
|----------|----------------------------------------------------|----------------|----|-------------|-------------|---------------------------------------------------------------------------------------------------------------------------------------|
| MDM2     | MDM2 Proto-Oncogene                                | Protein Coding | 59 | GC12P068808 | 4.121714115 | <a href="https://www.genecards.org/cgi-bin/carddisp.pl?gene=MDM2">https://www.genecards.org/cgi-bin/carddisp.pl?gene=MDM2</a>         |
| OPRM1    | Opioid Receptor Mu 1                               | Protein Coding | 55 | GC06P154123 | 4.121528625 | <a href="https://www.genecards.org/cgi-bin/carddisp.pl?gene=OPRM1">https://www.genecards.org/cgi-bin/carddisp.pl?gene=OPRM1</a>       |
| FHIT     | Fragile Histidine Triad Diadenosine Triphosphatase | Protein Coding | 51 | GC03M059747 | 4.118954182 | <a href="https://www.genecards.org/cgi-bin/carddisp.pl?gene=FHIT">https://www.genecards.org/cgi-bin/carddisp.pl?gene=FHIT</a>         |
| LRP6     | LDL Receptor Related Protein 6                     | Protein Coding | 55 | GC12M022658 | 4.107475281 | <a href="https://www.genecards.org/cgi-bin/carddisp.pl?gene=LRP6">https://www.genecards.org/cgi-bin/carddisp.pl?gene=LRP6</a>         |
| SLC22A11 | Solute Carrier Family 22 Member 11                 | Protein Coding | 47 | GC11P064573 | 4.107285976 | <a href="https://www.genecards.org/cgi-bin/carddisp.pl?gene=SLC22A11">https://www.genecards.org/cgi-bin/carddisp.pl?gene=SLC22A11</a> |
| ACTA1    | Actin Alpha 1, Skeletal Muscle                     | Protein Coding | 55 | GC01M229647 | 4.103856087 | <a href="https://www.genecards.org/cgi-bin/carddisp.pl?gene=ACTA1">https://www.genecards.org/cgi-bin/carddisp.pl?gene=ACTA1</a>       |
| ITGB3    | Integrin Subunit Beta 3                            | Protein Coding | 59 | GC17P062247 | 4.099756241 | <a href="https://www.genecards.org/cgi-bin/carddisp.pl?gene=ITGB3">https://www.genecards.org/cgi-bin/carddisp.pl?gene=ITGB3</a>       |
| NPM1     | Nucleophosmin 1                                    | Protein Coding | 57 | GC05P171387 | 4.094702721 | <a href="https://www.genecards.org/cgi-bin/carddisp.pl?gene=NPM1">https://www.genecards.org/cgi-bin/carddisp.pl?gene=NPM1</a>         |
| SGK1     | Serum/Glucocorticoid Regulated Kinase 1            | Protein Coding | 56 | GC06M134169 | 4.088385105 | <a href="https://www.genecards.org/cgi-bin/carddisp.pl?gene=SGK1">https://www.genecards.org/cgi-bin/carddisp.pl?gene=SGK1</a>         |
| IL1R1    | Interleukin 1 Receptor Type 1                      | Protein Coding | 53 | GC02P102136 | 4.08834362  | <a href="https://www.genecards.org/cgi-bin/carddisp.pl?gene=IL1R1">https://www.genecards.org/cgi-bin/carddisp.pl?gene=IL1R1</a>       |
| DLG4     | Discs Large MAGUK Scaffold Protein 4               | Protein Coding | 55 | GC17M007226 | 4.085865021 | <a href="https://www.genecards.org/cgi-bin/carddisp.pl?gene=DLG4">https://www.genecards.org/cgi-bin/carddisp.pl?gene=DLG4</a>         |
| PRTN3    | Proteinase 3                                       | Protein Coding | 52 | GC19P000840 | 4.081354618 | <a href="https://www.genecards.org/cgi-bin/carddisp.pl?gene=PRTN3">https://www.genecards.org/cgi-bin/carddisp.pl?gene=PRTN3</a>       |
| PPA1     | Inorganic Pyrophosphatase 1                        | Protein Coding | 50 | GC10M070202 | 4.078914165 | <a href="https://www.genecards.org/cgi-bin/carddisp.pl?gene=PPA1">https://www.genecards.org/cgi-bin/carddisp.pl?gene=PPA1</a>         |
| PDHA2    | Pyruvate Dehydrogenase E1 Subunit Alpha 2          | Protein Coding | 50 | GC04P095840 | 4.076750755 | <a href="https://www.genecards.org/cgi-bin/carddisp.pl?gene=PDHA2">https://www.genecards.org/cgi-bin/carddisp.pl?gene=PDHA2</a>       |
| OXT      | Oxytocin/Neurophysin I Prepropeptide               | Protein Coding | 44 | GC20P004488 | 4.070765495 | <a href="https://www.genecards.org/cgi-bin/carddisp.pl?gene=OXT">https://www.genecards.org/cgi-bin/carddisp.pl?gene=OXT</a>           |

|          |                                                                 |                |    |             |             |                                                                                                                                       |
|----------|-----------------------------------------------------------------|----------------|----|-------------|-------------|---------------------------------------------------------------------------------------------------------------------------------------|
| LMNB1    | Lamin B1                                                        | Protein Coding | 53 | GC05P126776 | 4.070357323 | <a href="https://www.genecards.org/cgi-bin/carddisp.pl?gene=LMNB1">https://www.genecards.org/cgi-bin/carddisp.pl?gene=LMNB1</a>       |
| INPP5D   | Inositol Polyphosphate-5-Phosphatase D                          | Protein Coding | 51 | GC02P233059 | 4.067728996 | <a href="https://www.genecards.org/cgi-bin/carddisp.pl?gene=INPP5D">https://www.genecards.org/cgi-bin/carddisp.pl?gene=INPP5D</a>     |
| NCOR2    | Nuclear Receptor Corepressor 2                                  | Protein Coding | 50 | GC12M124324 | 4.064220428 | <a href="https://www.genecards.org/cgi-bin/carddisp.pl?gene=NCOR2">https://www.genecards.org/cgi-bin/carddisp.pl?gene=NCOR2</a>       |
| XBP1     | X-Box Binding Protein 1                                         | Protein Coding | 52 | GC22M028794 | 4.061617851 | <a href="https://www.genecards.org/cgi-bin/carddisp.pl?gene=XBP1">https://www.genecards.org/cgi-bin/carddisp.pl?gene=XBP1</a>         |
| CHUK     | Component Of Inhibitor Of Nuclear Factor Kappa B Kinase Complex | Protein Coding | 58 | GC10M100202 | 4.053830147 | <a href="https://www.genecards.org/cgi-bin/carddisp.pl?gene=CHUK">https://www.genecards.org/cgi-bin/carddisp.pl?gene=CHUK</a>         |
| SERPINA7 | Serpin Family A Member 7                                        | Protein Coding | 48 | GC0XM106032 | 4.048786163 | <a href="https://www.genecards.org/cgi-bin/carddisp.pl?gene=SERPINA7">https://www.genecards.org/cgi-bin/carddisp.pl?gene=SERPINA7</a> |
| RB1      | RB Transcriptional Corepressor 1                                | Protein Coding | 55 | GC13P048303 | 4.047911167 | <a href="https://www.genecards.org/cgi-bin/carddisp.pl?gene=RB1">https://www.genecards.org/cgi-bin/carddisp.pl?gene=RB1</a>           |
| NOTCH1   | Notch Receptor 1                                                | Protein Coding | 60 | GC09M137729 | 4.046423912 | <a href="https://www.genecards.org/cgi-bin/carddisp.pl?gene=NOTCH1">https://www.genecards.org/cgi-bin/carddisp.pl?gene=NOTCH1</a>     |
| TSC1     | TSC Complex Subunit 1                                           | Protein Coding | 54 | GC09M132891 | 4.045608997 | <a href="https://www.genecards.org/cgi-bin/carddisp.pl?gene=TSC1">https://www.genecards.org/cgi-bin/carddisp.pl?gene=TSC1</a>         |
| CEBPB    | CCAAT Enhancer Binding Protein Beta                             | Protein Coding | 50 | GC20P050190 | 4.044969082 | <a href="https://www.genecards.org/cgi-bin/carddisp.pl?gene=CEBPB">https://www.genecards.org/cgi-bin/carddisp.pl?gene=CEBPB</a>       |
| PLD1     | Phospholipase D1                                                | Protein Coding | 55 | GC03M171600 | 4.041944981 | <a href="https://www.genecards.org/cgi-bin/carddisp.pl?gene=PLD1">https://www.genecards.org/cgi-bin/carddisp.pl?gene=PLD1</a>         |
| UGT2B10  | UDP Glucuronosyltransferase Family 2 Member B10                 | Protein Coding | 47 | GC04P068816 | 4.030697823 | <a href="https://www.genecards.org/cgi-bin/carddisp.pl?gene=UGT2B10">https://www.genecards.org/cgi-bin/carddisp.pl?gene=UGT2B10</a>   |
| WDR45    | WD Repeat Domain 45                                             | Protein Coding | 46 | GC0XM049074 | 4.027177334 | <a href="https://www.genecards.org/cgi-bin/carddisp.pl?gene=WDR45">https://www.genecards.org/cgi-bin/carddisp.pl?gene=WDR45</a>       |
| RIPK1    | Receptor Interacting Serine/Threonine Kinase 1                  | Protein Coding | 56 | GC06P003333 | 4.020352364 | <a href="https://www.genecards.org/cgi-bin/carddisp.pl?gene=RIPK1">https://www.genecards.org/cgi-bin/carddisp.pl?gene=RIPK1</a>       |
| EIF2AK4  | Eukaryotic Translation Initiation Factor 2 Alpha Kinase 4       | Protein Coding | 52 | GC15P039934 | 4.020245075 | <a href="https://www.genecards.org/cgi-bin/carddisp.pl?gene=EIF2AK4">https://www.genecards.org/cgi-bin/carddisp.pl?gene=EIF2AK4</a>   |

|         |                                                         |                |    |             |             |                                                                                                                                     |
|---------|---------------------------------------------------------|----------------|----|-------------|-------------|-------------------------------------------------------------------------------------------------------------------------------------|
| CERS1   | Ceramide Synthase 1                                     | Protein Coding | 49 | GC19M018868 | 4.019072056 | <a href="https://www.genecards.org/cgi-bin/carddisp.pl?gene=CERS1">https://www.genecards.org/cgi-bin/carddisp.pl?gene=CERS1</a>     |
| ENTPD1  | Ectonucleoside Triphosphate Diphosphohydrolase 1        | Protein Coding | 57 | GC10P095711 | 4.01881361  | <a href="https://www.genecards.org/cgi-bin/carddisp.pl?gene=ENTPD1">https://www.genecards.org/cgi-bin/carddisp.pl?gene=ENTPD1</a>   |
| CYP51A1 | Cytochrome P450 Family 51 Subfamily A Member 1          | Protein Coding | 50 | GC07M092112 | 4.017743111 | <a href="https://www.genecards.org/cgi-bin/carddisp.pl?gene=CYP51A1">https://www.genecards.org/cgi-bin/carddisp.pl?gene=CYP51A1</a> |
| MAP3K5  | Mitogen-Activated Protein Kinase Kinase Kinase 5        | Protein Coding | 55 | GC06M136557 | 4.017704487 | <a href="https://www.genecards.org/cgi-bin/carddisp.pl?gene=MAP3K5">https://www.genecards.org/cgi-bin/carddisp.pl?gene=MAP3K5</a>   |
| SLC36A1 | Solute Carrier Family 36 Member 1                       | Protein Coding | 46 | GC05P151344 | 4.017536163 | <a href="https://www.genecards.org/cgi-bin/carddisp.pl?gene=SLC36A1">https://www.genecards.org/cgi-bin/carddisp.pl?gene=SLC36A1</a> |
| HMMR    | Hyaluronan Mediated Motility Receptor                   | Protein Coding | 50 | GC05P163480 | 4.016493797 | <a href="https://www.genecards.org/cgi-bin/carddisp.pl?gene=HMMR">https://www.genecards.org/cgi-bin/carddisp.pl?gene=HMMR</a>       |
| PRKCB   | Protein Kinase C Beta                                   | Protein Coding | 55 | GC16P024574 | 4.015511513 | <a href="https://www.genecards.org/cgi-bin/carddisp.pl?gene=PRKCB">https://www.genecards.org/cgi-bin/carddisp.pl?gene=PRKCB</a>     |
| MOGAT2  | Monoacylglycerol O-Acyltransferase 2                    | Protein Coding | 43 | GC11P075717 | 4.011301994 | <a href="https://www.genecards.org/cgi-bin/carddisp.pl?gene=MOGAT2">https://www.genecards.org/cgi-bin/carddisp.pl?gene=MOGAT2</a>   |
| APOM    | Apolipoprotein M                                        | Protein Coding | 47 | GC06P092161 | 3.997857571 | <a href="https://www.genecards.org/cgi-bin/carddisp.pl?gene=APOM">https://www.genecards.org/cgi-bin/carddisp.pl?gene=APOM</a>       |
| THRB    | Thyroid Hormone Receptor Beta                           | Protein Coding | 56 | GC03M024117 | 3.983554363 | <a href="https://www.genecards.org/cgi-bin/carddisp.pl?gene=THRB">https://www.genecards.org/cgi-bin/carddisp.pl?gene=THRB</a>       |
| CKB     | Creatine Kinase B                                       | Protein Coding | 51 | GC14M103519 | 3.977226257 | <a href="https://www.genecards.org/cgi-bin/carddisp.pl?gene=CKB">https://www.genecards.org/cgi-bin/carddisp.pl?gene=CKB</a>         |
| RAPSN   | Receptor Associated Protein Of The Synapse              | Protein Coding | 48 | GC11M099370 | 3.971043825 | <a href="https://www.genecards.org/cgi-bin/carddisp.pl?gene=RAPSN">https://www.genecards.org/cgi-bin/carddisp.pl?gene=RAPSN</a>     |
| GRP     | Gastrin Releasing Peptide                               | Protein Coding | 47 | GC18P059220 | 3.969022274 | <a href="https://www.genecards.org/cgi-bin/carddisp.pl?gene=GRP">https://www.genecards.org/cgi-bin/carddisp.pl?gene=GRP</a>         |
| KCNMA1  | Potassium Calcium-Activated Channel Subfamily M Alpha 1 | Protein Coding | 56 | GC10M076869 | 3.950283051 | <a href="https://www.genecards.org/cgi-bin/carddisp.pl?gene=KCNMA1">https://www.genecards.org/cgi-bin/carddisp.pl?gene=KCNMA1</a>   |
| KLK3    | Kallikrein Related Peptidase 3                          | Protein Coding | 53 | GC19P050854 | 3.946335554 | <a href="https://www.genecards.org/cgi-bin/carddisp.pl?gene=KLK3">https://www.genecards.org/cgi-bin/carddisp.pl?gene=KLK3</a>       |

|         |                                               |                |    |             |             |                                                                                                                                     |
|---------|-----------------------------------------------|----------------|----|-------------|-------------|-------------------------------------------------------------------------------------------------------------------------------------|
| CDK5    | Cyclin Dependent Kinase 5                     | Protein Coding | 60 | GC07M151053 | 3.944981575 | <a href="https://www.genecards.org/cgi-bin/carddisp.pl?gene=CDK5">https://www.genecards.org/cgi-bin/carddisp.pl?gene=CDK5</a>       |
| SLC12A5 | Solute Carrier Family 12 Member 5             | Protein Coding | 55 | GC20P046021 | 3.943710566 | <a href="https://www.genecards.org/cgi-bin/carddisp.pl?gene=SLC12A5">https://www.genecards.org/cgi-bin/carddisp.pl?gene=SLC12A5</a> |
| CSF3    | Colony Stimulating Factor 3                   | Protein Coding | 47 | GC17P040015 | 3.937470913 | <a href="https://www.genecards.org/cgi-bin/carddisp.pl?gene=CSF3">https://www.genecards.org/cgi-bin/carddisp.pl?gene=CSF3</a>       |
| PDE3B   | Phosphodiesterase 3B                          | Protein Coding | 50 | GC11P014643 | 3.933916092 | <a href="https://www.genecards.org/cgi-bin/carddisp.pl?gene=PDE3B">https://www.genecards.org/cgi-bin/carddisp.pl?gene=PDE3B</a>     |
| IFNA2   | Interferon Alpha 2                            | Protein Coding | 50 | GC09M021384 | 3.93334651  | <a href="https://www.genecards.org/cgi-bin/carddisp.pl?gene=IFNA2">https://www.genecards.org/cgi-bin/carddisp.pl?gene=IFNA2</a>     |
| SLC1A4  | Solute Carrier Family 1 Member 4              | Protein Coding | 52 | GC02P064988 | 3.931900501 | <a href="https://www.genecards.org/cgi-bin/carddisp.pl?gene=SLC1A4">https://www.genecards.org/cgi-bin/carddisp.pl?gene=SLC1A4</a>   |
| AKT3    | AKT Serine/Threonine Kinase 3                 | Protein Coding | 61 | GC01M243488 | 3.922803879 | <a href="https://www.genecards.org/cgi-bin/carddisp.pl?gene=AKT3">https://www.genecards.org/cgi-bin/carddisp.pl?gene=AKT3</a>       |
| H19     | H19 Imprinted Maternally Expressed Transcript | RNA Gene       | 30 | GC11M001995 | 3.921946287 | <a href="https://www.genecards.org/cgi-bin/carddisp.pl?gene=H19">https://www.genecards.org/cgi-bin/carddisp.pl?gene=H19</a>         |
| CTLA4   | Cytotoxic T-Lymphocyte Associated Protein 4   | Protein Coding | 54 | GC02P203854 | 3.916200161 | <a href="https://www.genecards.org/cgi-bin/carddisp.pl?gene=CTLA4">https://www.genecards.org/cgi-bin/carddisp.pl?gene=CTLA4</a>     |
| RAC1    | Rac Family Small GTPase 1                     | Protein Coding | 55 | GC07P006377 | 3.913594246 | <a href="https://www.genecards.org/cgi-bin/carddisp.pl?gene=RAC1">https://www.genecards.org/cgi-bin/carddisp.pl?gene=RAC1</a>       |
| H4C16   | H4 Histone 16                                 | Protein Coding | 42 | GC12M022801 | 3.911123037 | <a href="https://www.genecards.org/cgi-bin/carddisp.pl?gene=H4C16">https://www.genecards.org/cgi-bin/carddisp.pl?gene=H4C16</a>     |
| GPX3    | Glutathione Peroxidase 3                      | Protein Coding | 47 | GC05P150997 | 3.910354376 | <a href="https://www.genecards.org/cgi-bin/carddisp.pl?gene=GPX3">https://www.genecards.org/cgi-bin/carddisp.pl?gene=GPX3</a>       |
| MYO5B   | Myosin VB                                     | Protein Coding | 50 | GC18M049822 | 3.909657717 | <a href="https://www.genecards.org/cgi-bin/carddisp.pl?gene=MYO5B">https://www.genecards.org/cgi-bin/carddisp.pl?gene=MYO5B</a>     |
| STUB1   | STIP1 Homology And U-Box Containing Protein 1 | Protein Coding | 53 | GC16P013453 | 3.907438517 | <a href="https://www.genecards.org/cgi-bin/carddisp.pl?gene=STUB1">https://www.genecards.org/cgi-bin/carddisp.pl?gene=STUB1</a>     |
| E2F1    | E2F Transcription Factor 1                    | Protein Coding | 50 | GC20M033675 | 3.905562401 | <a href="https://www.genecards.org/cgi-bin/carddisp.pl?gene=E2F1">https://www.genecards.org/cgi-bin/carddisp.pl?gene=E2F1</a>       |

|          |                                                                     |                |    |             |             |                                                                                                                                       |
|----------|---------------------------------------------------------------------|----------------|----|-------------|-------------|---------------------------------------------------------------------------------------------------------------------------------------|
| IL15     | Interleukin 15                                                      | Protein Coding | 49 | GC04P141636 | 3.902137041 | <a href="https://www.genecards.org/cgi-bin/carddisp.pl?gene=IL15">https://www.genecards.org/cgi-bin/carddisp.pl?gene=IL15</a>         |
| HTR2A    | 5-Hydroxytryptamine Receptor 2A                                     | Protein Coding | 55 | GC13M046831 | 3.901376009 | <a href="https://www.genecards.org/cgi-bin/carddisp.pl?gene=HTR2A">https://www.genecards.org/cgi-bin/carddisp.pl?gene=HTR2A</a>       |
| LPO      | Lactoperoxidase                                                     | Protein Coding | 46 | GC17P058218 | 3.900479317 | <a href="https://www.genecards.org/cgi-bin/carddisp.pl?gene=LPO">https://www.genecards.org/cgi-bin/carddisp.pl?gene=LPO</a>           |
| LAMP1    | Lysosomal Associated Membrane Protein 1                             | Protein Coding | 50 | GC13P113297 | 3.897934437 | <a href="https://www.genecards.org/cgi-bin/carddisp.pl?gene=LAMP1">https://www.genecards.org/cgi-bin/carddisp.pl?gene=LAMP1</a>       |
| IKBKG    | Inhibitor Of Nuclear Factor Kappa B Kinase Regulatory Subunit Gamma | Protein Coding | 55 | GC0XP154541 | 3.894810677 | <a href="https://www.genecards.org/cgi-bin/carddisp.pl?gene=IKBKG">https://www.genecards.org/cgi-bin/carddisp.pl?gene=IKBKG</a>       |
| ADM      | Adrenomedullin                                                      | Protein Coding | 51 | GC11P010304 | 3.88862443  | <a href="https://www.genecards.org/cgi-bin/carddisp.pl?gene=ADM">https://www.genecards.org/cgi-bin/carddisp.pl?gene=ADM</a>           |
| MSH6     | MutS Homolog 6                                                      | Protein Coding | 55 | GC02P047695 | 3.887536764 | <a href="https://www.genecards.org/cgi-bin/carddisp.pl?gene=MSH6">https://www.genecards.org/cgi-bin/carddisp.pl?gene=MSH6</a>         |
| CA9      | Carbonic Anhydrase 9                                                | Protein Coding | 53 | GC09P035673 | 3.883813143 | <a href="https://www.genecards.org/cgi-bin/carddisp.pl?gene=CA9">https://www.genecards.org/cgi-bin/carddisp.pl?gene=CA9</a>           |
| TUBB1    | Tubulin Beta 1 Class VI                                             | Protein Coding | 53 | GC20P059020 | 3.882990837 | <a href="https://www.genecards.org/cgi-bin/carddisp.pl?gene=TUBB1">https://www.genecards.org/cgi-bin/carddisp.pl?gene=TUBB1</a>       |
| GATA3    | GATA Binding Protein 3                                              | Protein Coding | 56 | GC10P008045 | 3.879091263 | <a href="https://www.genecards.org/cgi-bin/carddisp.pl?gene=GATA3">https://www.genecards.org/cgi-bin/carddisp.pl?gene=GATA3</a>       |
| GRB2     | Growth Factor Receptor Bound Protein 2                              | Protein Coding | 52 | GC17M075318 | 3.878803253 | <a href="https://www.genecards.org/cgi-bin/carddisp.pl?gene=GRB2">https://www.genecards.org/cgi-bin/carddisp.pl?gene=GRB2</a>         |
| ESRRB    | Estrogen Related Receptor Beta                                      | Protein Coding | 54 | GC14P076310 | 3.874730587 | <a href="https://www.genecards.org/cgi-bin/carddisp.pl?gene=ESRRB">https://www.genecards.org/cgi-bin/carddisp.pl?gene=ESRRB</a>       |
| SERPINF1 | Serpin Family F Member 1                                            | Protein Coding | 53 | GC17P001766 | 3.874513626 | <a href="https://www.genecards.org/cgi-bin/carddisp.pl?gene=SERPINF1">https://www.genecards.org/cgi-bin/carddisp.pl?gene=SERPINF1</a> |
| IL7R     | Interleukin 7 Receptor                                              | Protein Coding | 52 | GC05P035852 | 3.873098135 | <a href="https://www.genecards.org/cgi-bin/carddisp.pl?gene=IL7R">https://www.genecards.org/cgi-bin/carddisp.pl?gene=IL7R</a>         |
| CD55     | CD55 Molecule (Cromer Blood Group)                                  | Protein Coding | 56 | GC01P207321 | 3.870641232 | <a href="https://www.genecards.org/cgi-bin/carddisp.pl?gene=CD55">https://www.genecards.org/cgi-bin/carddisp.pl?gene=CD55</a>         |

|          |                                                                       |                |    |             |             |                                                                                                                                       |
|----------|-----------------------------------------------------------------------|----------------|----|-------------|-------------|---------------------------------------------------------------------------------------------------------------------------------------|
| NPR3     | Natriuretic Peptide Receptor 3                                        | Protein Coding | 52 | GC05P032689 | 3.868728161 | <a href="https://www.genecards.org/cgi-bin/carddisp.pl?gene=NPR3">https://www.genecards.org/cgi-bin/carddisp.pl?gene=NPR3</a>         |
| HNRNPC   | Heterogeneous Nuclear Ribonucleoprotein C                             | Protein Coding | 48 | GC14M023657 | 3.863192081 | <a href="https://www.genecards.org/cgi-bin/carddisp.pl?gene=HNRNPC">https://www.genecards.org/cgi-bin/carddisp.pl?gene=HNRNPC</a>     |
| PTK2     | Protein Tyrosine Kinase 2                                             | Protein Coding | 55 | GC08M140657 | 3.861723185 | <a href="https://www.genecards.org/cgi-bin/carddisp.pl?gene=PTK2">https://www.genecards.org/cgi-bin/carddisp.pl?gene=PTK2</a>         |
| NME2     | NME/NM23 Nucleoside Diphosphate Kinase 2                              | Protein Coding | 52 | GC17P051165 | 3.860429049 | <a href="https://www.genecards.org/cgi-bin/carddisp.pl?gene=NME2">https://www.genecards.org/cgi-bin/carddisp.pl?gene=NME2</a>         |
| SLC16A10 | Solute Carrier Family 16 Member 10                                    | Protein Coding | 44 | GC06P111087 | 3.857141495 | <a href="https://www.genecards.org/cgi-bin/carddisp.pl?gene=SLC16A10">https://www.genecards.org/cgi-bin/carddisp.pl?gene=SLC16A10</a> |
| IRAK1    | Interleukin 1 Receptor Associated Kinase 1                            | Protein Coding | 56 | GC0XM154010 | 3.856891394 | <a href="https://www.genecards.org/cgi-bin/carddisp.pl?gene=IRAK1">https://www.genecards.org/cgi-bin/carddisp.pl?gene=IRAK1</a>       |
| IGFBP5   | Insulin Like Growth Factor Binding Protein 5                          | Protein Coding | 49 | GC02M216672 | 3.853482246 | <a href="https://www.genecards.org/cgi-bin/carddisp.pl?gene=IGFBP5">https://www.genecards.org/cgi-bin/carddisp.pl?gene=IGFBP5</a>     |
| KHDRBS1  | KH RNA Binding Domain Containing, Signal Transduction Associated<br>1 | Protein Coding | 47 | GC01P032013 | 3.852282047 | <a href="https://www.genecards.org/cgi-bin/carddisp.pl?gene=KHDRBS1">https://www.genecards.org/cgi-bin/carddisp.pl?gene=KHDRBS1</a>   |
| GARS1    | Glycyl-TRNA Synthetase 1                                              | Protein Coding | 52 | GC07P030580 | 3.85188961  | <a href="https://www.genecards.org/cgi-bin/carddisp.pl?gene=GARS1">https://www.genecards.org/cgi-bin/carddisp.pl?gene=GARS1</a>       |
| ACSM5    | Acyl-CoA Synthetase Medium Chain Family Member 5                      | Protein Coding | 44 | GC16P020410 | 3.850166559 | <a href="https://www.genecards.org/cgi-bin/carddisp.pl?gene=ACSM5">https://www.genecards.org/cgi-bin/carddisp.pl?gene=ACSM5</a>       |
| FGA      | Fibrinogen Alpha Chain                                                | Protein Coding | 56 | GC04M154583 | 3.84565568  | <a href="https://www.genecards.org/cgi-bin/carddisp.pl?gene=FGA">https://www.genecards.org/cgi-bin/carddisp.pl?gene=FGA</a>           |
| ADCYAP1  | Adenylate Cyclase Activating Polypeptide 1                            | Protein Coding | 47 | GC18P000895 | 3.83665657  | <a href="https://www.genecards.org/cgi-bin/carddisp.pl?gene=ADCYAP1">https://www.genecards.org/cgi-bin/carddisp.pl?gene=ADCYAP1</a>   |
| KEAP1    | Kelch Like ECH Associated Protein 1                                   | Protein Coding | 56 | GC19M010486 | 3.835975885 | <a href="https://www.genecards.org/cgi-bin/carddisp.pl?gene=KEAP1">https://www.genecards.org/cgi-bin/carddisp.pl?gene=KEAP1</a>       |
| PDE4A    | Phosphodiesterase 4A                                                  | Protein Coding | 51 | GC19P010416 | 3.835870028 | <a href="https://www.genecards.org/cgi-bin/carddisp.pl?gene=PDE4A">https://www.genecards.org/cgi-bin/carddisp.pl?gene=PDE4A</a>       |
| CCKAR    | Cholecystokinin A Receptor                                            | Protein Coding | 52 | GC04M026483 | 3.835656404 | <a href="https://www.genecards.org/cgi-bin/carddisp.pl?gene=CCKAR">https://www.genecards.org/cgi-bin/carddisp.pl?gene=CCKAR</a>       |

|         |                                                       |                |    |             |             |                                                                                                                                     |
|---------|-------------------------------------------------------|----------------|----|-------------|-------------|-------------------------------------------------------------------------------------------------------------------------------------|
| PRKACG  | Protein Kinase CAMP-Activated Catalytic Subunit Gamma | Protein Coding | 53 | GC09M069046 | 3.832050562 | <a href="https://www.genecards.org/cgi-bin/carddisp.pl?gene=PRKACG">https://www.genecards.org/cgi-bin/carddisp.pl?gene=PRKACG</a>   |
| ACSL5   | Acyl-CoA Synthetase Long Chain Family Member 5        | Protein Coding | 49 | GC10P112374 | 3.831627607 | <a href="https://www.genecards.org/cgi-bin/carddisp.pl?gene=ACSL5">https://www.genecards.org/cgi-bin/carddisp.pl?gene=ACSL5</a>     |
| PNMT    | Phenylethanolamine N-Methyltransferase                | Protein Coding | 50 | GC17P039667 | 3.831362724 | <a href="https://www.genecards.org/cgi-bin/carddisp.pl?gene=PNMT">https://www.genecards.org/cgi-bin/carddisp.pl?gene=PNMT</a>       |
| CGB5    | Chorionic Gonadotropin Subunit Beta 5                 | Protein Coding | 37 | GC19P049043 | 3.828410149 | <a href="https://www.genecards.org/cgi-bin/carddisp.pl?gene=CGB5">https://www.genecards.org/cgi-bin/carddisp.pl?gene=CGB5</a>       |
| GUK1    | Guanylate Kinase 1                                    | Protein Coding | 47 | GC01P228139 | 3.826385498 | <a href="https://www.genecards.org/cgi-bin/carddisp.pl?gene=GUK1">https://www.genecards.org/cgi-bin/carddisp.pl?gene=GUK1</a>       |
| AGMO    | Alkylglycerol Monooxygenase                           | Protein Coding | 42 | GC07M015117 | 3.824967861 | <a href="https://www.genecards.org/cgi-bin/carddisp.pl?gene=AGMO">https://www.genecards.org/cgi-bin/carddisp.pl?gene=AGMO</a>       |
| SYK     | Spleen Associated Tyrosine Kinase                     | Protein Coding | 56 | GC09P092704 | 3.822367668 | <a href="https://www.genecards.org/cgi-bin/carddisp.pl?gene=SYK">https://www.genecards.org/cgi-bin/carddisp.pl?gene=SYK</a>         |
| CERS6   | Ceramide Synthase 6                                   | Protein Coding | 47 | GC02P168455 | 3.821056366 | <a href="https://www.genecards.org/cgi-bin/carddisp.pl?gene=CERS6">https://www.genecards.org/cgi-bin/carddisp.pl?gene=CERS6</a>     |
| SEC14L2 | SEC14 Like Lipid Binding 2                            | Protein Coding | 46 | GC22P030396 | 3.81583333  | <a href="https://www.genecards.org/cgi-bin/carddisp.pl?gene=SEC14L2">https://www.genecards.org/cgi-bin/carddisp.pl?gene=SEC14L2</a> |
| SORT1   | Sortilin 1                                            | Protein Coding | 51 | GC01M109310 | 3.81338954  | <a href="https://www.genecards.org/cgi-bin/carddisp.pl?gene=SORT1">https://www.genecards.org/cgi-bin/carddisp.pl?gene=SORT1</a>     |
| RARB    | Retinoic Acid Receptor Beta                           | Protein Coding | 56 | GC03P024689 | 3.813275337 | <a href="https://www.genecards.org/cgi-bin/carddisp.pl?gene=RARB">https://www.genecards.org/cgi-bin/carddisp.pl?gene=RARB</a>       |
| LRP8    | LDL Receptor Related Protein 8                        | Protein Coding | 50 | GC01M053243 | 3.812624216 | <a href="https://www.genecards.org/cgi-bin/carddisp.pl?gene=LRP8">https://www.genecards.org/cgi-bin/carddisp.pl?gene=LRP8</a>       |
| ITGB1   | Integrin Subunit Beta 1                               | Protein Coding | 57 | GC10M033645 | 3.809351444 | <a href="https://www.genecards.org/cgi-bin/carddisp.pl?gene=ITGB1">https://www.genecards.org/cgi-bin/carddisp.pl?gene=ITGB1</a>     |
| SRY     | Sex Determining Region Y                              | Protein Coding | 42 | GC0YM002698 | 3.805636406 | <a href="https://www.genecards.org/cgi-bin/carddisp.pl?gene=SRY">https://www.genecards.org/cgi-bin/carddisp.pl?gene=SRY</a>         |
| MGST1   | Microsomal Glutathione S-Transferase 1                | Protein Coding | 47 | GC12P016347 | 3.804653168 | <a href="https://www.genecards.org/cgi-bin/carddisp.pl?gene=MGST1">https://www.genecards.org/cgi-bin/carddisp.pl?gene=MGST1</a>     |

|         |                                                     |                |    |             |             |                                                                                                                                     |
|---------|-----------------------------------------------------|----------------|----|-------------|-------------|-------------------------------------------------------------------------------------------------------------------------------------|
| CANX    | Calnexin                                            | Protein Coding | 51 | GC05P179678 | 3.798567057 | <a href="https://www.genecards.org/cgi-bin/carddisp.pl?gene=CANX">https://www.genecards.org/cgi-bin/carddisp.pl?gene=CANX</a>       |
| PLA2G2E | Phospholipase A2 Group IIE                          | Protein Coding | 43 | GC01M019920 | 3.789566994 | <a href="https://www.genecards.org/cgi-bin/carddisp.pl?gene=PLA2G2E">https://www.genecards.org/cgi-bin/carddisp.pl?gene=PLA2G2E</a> |
| SULT1B1 | Sulfotransferase Family 1B Member 1                 | Protein Coding | 47 | GC04M069721 | 3.787377834 | <a href="https://www.genecards.org/cgi-bin/carddisp.pl?gene=SULT1B1">https://www.genecards.org/cgi-bin/carddisp.pl?gene=SULT1B1</a> |
| NR4A2   | Nuclear Receptor Subfamily 4 Group A Member 2       | Protein Coding | 53 | GC02M156324 | 3.786156893 | <a href="https://www.genecards.org/cgi-bin/carddisp.pl?gene=NR4A2">https://www.genecards.org/cgi-bin/carddisp.pl?gene=NR4A2</a>     |
| SMN2    | Survival Of Motor Neuron 2, Centromeric             | Protein Coding | 46 | GC05P070049 | 3.781511784 | <a href="https://www.genecards.org/cgi-bin/carddisp.pl?gene=SMN2">https://www.genecards.org/cgi-bin/carddisp.pl?gene=SMN2</a>       |
| BTBD10  | BTB Domain Containing 10                            | Protein Coding | 43 | GC11M013387 | 3.778814316 | <a href="https://www.genecards.org/cgi-bin/carddisp.pl?gene=BTBD10">https://www.genecards.org/cgi-bin/carddisp.pl?gene=BTBD10</a>   |
| ADAR    | Adenosine Deaminase RNA Specific                    | Protein Coding | 52 | GC01M154599 | 3.766012192 | <a href="https://www.genecards.org/cgi-bin/carddisp.pl?gene=ADAR">https://www.genecards.org/cgi-bin/carddisp.pl?gene=ADAR</a>       |
| CTSK    | Cathepsin K                                         | Protein Coding | 57 | GC01M152758 | 3.764894962 | <a href="https://www.genecards.org/cgi-bin/carddisp.pl?gene=CTSK">https://www.genecards.org/cgi-bin/carddisp.pl?gene=CTSK</a>       |
| TRAF6   | TNF Receptor Associated Factor 6                    | Protein Coding | 52 | GC11M036467 | 3.761487722 | <a href="https://www.genecards.org/cgi-bin/carddisp.pl?gene=TRAF6">https://www.genecards.org/cgi-bin/carddisp.pl?gene=TRAF6</a>     |
| CNR2    | Cannabinoid Receptor 2                              | Protein Coding | 51 | GC01M023870 | 3.759726048 | <a href="https://www.genecards.org/cgi-bin/carddisp.pl?gene=CNR2">https://www.genecards.org/cgi-bin/carddisp.pl?gene=CNR2</a>       |
| DGKA    | Diacylglycerol Kinase Alpha                         | Protein Coding | 51 | GC12P055927 | 3.755910397 | <a href="https://www.genecards.org/cgi-bin/carddisp.pl?gene=DGKA">https://www.genecards.org/cgi-bin/carddisp.pl?gene=DGKA</a>       |
| CYP3A43 | Cytochrome P450 Family 3 Subfamily A Member 43      | Protein Coding | 46 | GC07P099833 | 3.754785776 | <a href="https://www.genecards.org/cgi-bin/carddisp.pl?gene=CYP3A43">https://www.genecards.org/cgi-bin/carddisp.pl?gene=CYP3A43</a> |
| DRD4    | Dopamine Receptor D4                                | Protein Coding | 52 | GC11P002096 | 3.753496647 | <a href="https://www.genecards.org/cgi-bin/carddisp.pl?gene=DRD4">https://www.genecards.org/cgi-bin/carddisp.pl?gene=DRD4</a>       |
| PCSK2   | Proprotein Convertase Subtilisin/Kexin Type 2       | Protein Coding | 50 | GC20P017226 | 3.745601177 | <a href="https://www.genecards.org/cgi-bin/carddisp.pl?gene=PCSK2">https://www.genecards.org/cgi-bin/carddisp.pl?gene=PCSK2</a>     |
| STAT5B  | Signal Transducer And Activator Of Transcription 5B | Protein Coding | 56 | GC17M042199 | 3.744742155 | <a href="https://www.genecards.org/cgi-bin/carddisp.pl?gene=STAT5B">https://www.genecards.org/cgi-bin/carddisp.pl?gene=STAT5B</a>   |

|         |                                                            |                |    |             |             |                                                                                                                                     |
|---------|------------------------------------------------------------|----------------|----|-------------|-------------|-------------------------------------------------------------------------------------------------------------------------------------|
| TJP2    | Tight Junction Protein 2                                   | Protein Coding | 51 | GC09P069121 | 3.744441032 | <a href="https://www.genecards.org/cgi-bin/carddisp.pl?gene=TJP2">https://www.genecards.org/cgi-bin/carddisp.pl?gene=TJP2</a>       |
| KCNJ2   | Potassium Inwardly Rectifying Channel Subfamily J Member 2 | Protein Coding | 55 | GC17P070168 | 3.729247332 | <a href="https://www.genecards.org/cgi-bin/carddisp.pl?gene=KCNJ2">https://www.genecards.org/cgi-bin/carddisp.pl?gene=KCNJ2</a>     |
| GPAT3   | Glycerol-3-Phosphate Acyltransferase 3                     | Protein Coding | 47 | GC04P083536 | 3.729138851 | <a href="https://www.genecards.org/cgi-bin/carddisp.pl?gene=GPAT3">https://www.genecards.org/cgi-bin/carddisp.pl?gene=GPAT3</a>     |
| SIK2    | Salt Inducible Kinase 2                                    | Protein Coding | 52 | GC11P111989 | 3.725149632 | <a href="https://www.genecards.org/cgi-bin/carddisp.pl?gene=SIK2">https://www.genecards.org/cgi-bin/carddisp.pl?gene=SIK2</a>       |
| TWIST1  | Twist Family BHLH Transcription Factor 1                   | Protein Coding | 52 | GC07M019020 | 3.721744061 | <a href="https://www.genecards.org/cgi-bin/carddisp.pl?gene=TWIST1">https://www.genecards.org/cgi-bin/carddisp.pl?gene=TWIST1</a>   |
| GLRX    | Glutaredoxin                                               | Protein Coding | 50 | GC05M095752 | 3.718975544 | <a href="https://www.genecards.org/cgi-bin/carddisp.pl?gene=GLRX">https://www.genecards.org/cgi-bin/carddisp.pl?gene=GLRX</a>       |
| PAM     | Peptidylglycine Alpha-Amidating Monooxygenase              | Protein Coding | 50 | GC05P102753 | 3.717186213 | <a href="https://www.genecards.org/cgi-bin/carddisp.pl?gene=PAM">https://www.genecards.org/cgi-bin/carddisp.pl?gene=PAM</a>         |
| SELL    | Selectin L                                                 | Protein Coding | 50 | GC01M169690 | 3.716027021 | <a href="https://www.genecards.org/cgi-bin/carddisp.pl?gene=SELL">https://www.genecards.org/cgi-bin/carddisp.pl?gene=SELL</a>       |
| SULT4A1 | Sulfotransferase Family 4A Member 1                        | Protein Coding | 46 | GC22M043824 | 3.715360165 | <a href="https://www.genecards.org/cgi-bin/carddisp.pl?gene=SULT4A1">https://www.genecards.org/cgi-bin/carddisp.pl?gene=SULT4A1</a> |
| HNRNPD  | Heterogeneous Nuclear Ribonucleoprotein D                  | Protein Coding | 50 | GC04M082352 | 3.702080965 | <a href="https://www.genecards.org/cgi-bin/carddisp.pl?gene=HNRNPD">https://www.genecards.org/cgi-bin/carddisp.pl?gene=HNRNPD</a>   |
| CERS2   | Ceramide Synthase 2                                        | Protein Coding | 48 | GC01M150960 | 3.701366425 | <a href="https://www.genecards.org/cgi-bin/carddisp.pl?gene=CERS2">https://www.genecards.org/cgi-bin/carddisp.pl?gene=CERS2</a>     |
| GPAT2   | Glycerol-3-Phosphate Acyltransferase 2, Mitochondrial      | Protein Coding | 39 | GC02M098745 | 3.699226379 | <a href="https://www.genecards.org/cgi-bin/carddisp.pl?gene=GPAT2">https://www.genecards.org/cgi-bin/carddisp.pl?gene=GPAT2</a>     |
| CASP1   | Caspase 1                                                  | Protein Coding | 56 | GC11M105025 | 3.698204041 | <a href="https://www.genecards.org/cgi-bin/carddisp.pl?gene=CASP1">https://www.genecards.org/cgi-bin/carddisp.pl?gene=CASP1</a>     |
| CAV2    | Caveolin 2                                                 | Protein Coding | 50 | GC07P116287 | 3.696254253 | <a href="https://www.genecards.org/cgi-bin/carddisp.pl?gene=CAV2">https://www.genecards.org/cgi-bin/carddisp.pl?gene=CAV2</a>       |
| PSAT1   | Phosphoserine Aminotransferase 1                           | Protein Coding | 54 | GC09P078297 | 3.693089008 | <a href="https://www.genecards.org/cgi-bin/carddisp.pl?gene=PSAT1">https://www.genecards.org/cgi-bin/carddisp.pl?gene=PSAT1</a>     |

|          |                                                                  |                |    |             |             |                                                                                                                                       |
|----------|------------------------------------------------------------------|----------------|----|-------------|-------------|---------------------------------------------------------------------------------------------------------------------------------------|
| TGM2     | Transglutaminase 2                                               | Protein Coding | 54 | GC20M038127 | 3.692184448 | <a href="https://www.genecards.org/cgi-bin/carddisp.pl?gene=TGM2">https://www.genecards.org/cgi-bin/carddisp.pl?gene=TGM2</a>         |
| TLR3     | Toll Like Receptor 3                                             | Protein Coding | 58 | GC04P186059 | 3.689142704 | <a href="https://www.genecards.org/cgi-bin/carddisp.pl?gene=TLR3">https://www.genecards.org/cgi-bin/carddisp.pl?gene=TLR3</a>         |
| WARS1    | Tryptophanyl-TRNA Synthetase 1                                   | Protein Coding | 52 | GC14M103181 | 3.687915325 | <a href="https://www.genecards.org/cgi-bin/carddisp.pl?gene=WARS1">https://www.genecards.org/cgi-bin/carddisp.pl?gene=WARS1</a>       |
| GSTA4    | Glutathione S-Transferase Alpha 4                                | Protein Coding | 47 | GC06M052977 | 3.68756938  | <a href="https://www.genecards.org/cgi-bin/carddisp.pl?gene=GSTA4">https://www.genecards.org/cgi-bin/carddisp.pl?gene=GSTA4</a>       |
| HSD17B12 | Hydroxysteroid 17-Beta Dehydrogenase 12                          | Protein Coding | 46 | GC11P043652 | 3.686990738 | <a href="https://www.genecards.org/cgi-bin/carddisp.pl?gene=HSD17B12">https://www.genecards.org/cgi-bin/carddisp.pl?gene=HSD17B12</a> |
| LIPF     | Lipase F, Gastric Type                                           | Protein Coding | 49 | GC10P088664 | 3.683813572 | <a href="https://www.genecards.org/cgi-bin/carddisp.pl?gene=LIPF">https://www.genecards.org/cgi-bin/carddisp.pl?gene=LIPF</a>         |
| SCD5     | Stearoyl-CoA Desaturase 5                                        | Protein Coding | 48 | GC04M082629 | 3.682816505 | <a href="https://www.genecards.org/cgi-bin/carddisp.pl?gene=SCD5">https://www.genecards.org/cgi-bin/carddisp.pl?gene=SCD5</a>         |
| PTGES3   | Prostaglandin E Synthase 3                                       | Protein Coding | 51 | GC12M057070 | 3.682389259 | <a href="https://www.genecards.org/cgi-bin/carddisp.pl?gene=PTGES3">https://www.genecards.org/cgi-bin/carddisp.pl?gene=PTGES3</a>     |
| AZIN2    | Antizyme Inhibitor 2                                             | Protein Coding | 47 | GC01P033081 | 3.678210258 | <a href="https://www.genecards.org/cgi-bin/carddisp.pl?gene=AZIN2">https://www.genecards.org/cgi-bin/carddisp.pl?gene=AZIN2</a>       |
| BMP4     | Bone Morphogenetic Protein 4                                     | Protein Coding | 55 | GC14M053949 | 3.675657272 | <a href="https://www.genecards.org/cgi-bin/carddisp.pl?gene=BMP4">https://www.genecards.org/cgi-bin/carddisp.pl?gene=BMP4</a>         |
| PLCB4    | Phospholipase C Beta 4                                           | Protein Coding | 52 | GC20P009024 | 3.674196005 | <a href="https://www.genecards.org/cgi-bin/carddisp.pl?gene=PLCB4">https://www.genecards.org/cgi-bin/carddisp.pl?gene=PLCB4</a>       |
| MBL2     | Mannose Binding Lectin 2                                         | Protein Coding | 53 | GC10M052760 | 3.673710585 | <a href="https://www.genecards.org/cgi-bin/carddisp.pl?gene=MBL2">https://www.genecards.org/cgi-bin/carddisp.pl?gene=MBL2</a>         |
| AGTR2    | Angiotensin II Receptor Type 2                                   | Protein Coding | 51 | GC0XP116170 | 3.668705702 | <a href="https://www.genecards.org/cgi-bin/carddisp.pl?gene=AGTR2">https://www.genecards.org/cgi-bin/carddisp.pl?gene=AGTR2</a>       |
| RPL11    | Ribosomal Protein L11                                            | Protein Coding | 55 | GC01P023691 | 3.668517351 | <a href="https://www.genecards.org/cgi-bin/carddisp.pl?gene=RPL11">https://www.genecards.org/cgi-bin/carddisp.pl?gene=RPL11</a>       |
| TRPV1    | Transient Receptor Potential Cation Channel Subfamily V Member 1 | Protein Coding | 55 | GC17M003565 | 3.657725573 | <a href="https://www.genecards.org/cgi-bin/carddisp.pl?gene=TRPV1">https://www.genecards.org/cgi-bin/carddisp.pl?gene=TRPV1</a>       |

|          |                                                               |                |    |             |             |                                                                                                                                       |
|----------|---------------------------------------------------------------|----------------|----|-------------|-------------|---------------------------------------------------------------------------------------------------------------------------------------|
| CNTF     | Ciliary Neurotrophic Factor                                   | Protein Coding | 47 | GC11P058622 | 3.656933069 | <a href="https://www.genecards.org/cgi-bin/carddisp.pl?gene=CNTF">https://www.genecards.org/cgi-bin/carddisp.pl?gene=CNTF</a>         |
| IL2RA    | Interleukin 2 Receptor Subunit Alpha                          | Protein Coding | 57 | GC10M006010 | 3.654792786 | <a href="https://www.genecards.org/cgi-bin/carddisp.pl?gene=IL2RA">https://www.genecards.org/cgi-bin/carddisp.pl?gene=IL2RA</a>       |
| ACSM4    | Acyl-CoA Synthetase Medium Chain Family Member 4              | Protein Coding | 38 | GC12P007304 | 3.649587154 | <a href="https://www.genecards.org/cgi-bin/carddisp.pl?gene=ACSM4">https://www.genecards.org/cgi-bin/carddisp.pl?gene=ACSM4</a>       |
| EIF4EBP1 | Eukaryotic Translation Initiation Factor 4E Binding Protein 1 | Protein Coding | 53 | GC08P038607 | 3.646658659 | <a href="https://www.genecards.org/cgi-bin/carddisp.pl?gene=EIF4EBP1">https://www.genecards.org/cgi-bin/carddisp.pl?gene=EIF4EBP1</a> |
| BIRC5    | Baculoviral IAP Repeat Containing 5                           | Protein Coding | 52 | GC17P078214 | 3.645214796 | <a href="https://www.genecards.org/cgi-bin/carddisp.pl?gene=BIRC5">https://www.genecards.org/cgi-bin/carddisp.pl?gene=BIRC5</a>       |
| CALM1    | Calmodulin 1                                                  | Protein Coding | 52 | GC14P090396 | 3.641564131 | <a href="https://www.genecards.org/cgi-bin/carddisp.pl?gene=CALM1">https://www.genecards.org/cgi-bin/carddisp.pl?gene=CALM1</a>       |
| ETV6     | ETS Variant Transcription Factor 6                            | Protein Coding | 52 | GC12P011649 | 3.639504433 | <a href="https://www.genecards.org/cgi-bin/carddisp.pl?gene=ETV6">https://www.genecards.org/cgi-bin/carddisp.pl?gene=ETV6</a>         |
| BMPR2    | Bone Morphogenetic Protein Receptor Type 2                    | Protein Coding | 57 | GC02P202376 | 3.636691809 | <a href="https://www.genecards.org/cgi-bin/carddisp.pl?gene=BMPR2">https://www.genecards.org/cgi-bin/carddisp.pl?gene=BMPR2</a>       |
| IL1RAPL2 | Interleukin 1 Receptor Accessory Protein Like 2               | Protein Coding | 46 | GC0XP104566 | 3.632210255 | <a href="https://www.genecards.org/cgi-bin/carddisp.pl?gene=IL1RAPL2">https://www.genecards.org/cgi-bin/carddisp.pl?gene=IL1RAPL2</a> |
| SLC6A2   | Solute Carrier Family 6 Member 2                              | Protein Coding | 54 | GC16P055656 | 3.631602526 | <a href="https://www.genecards.org/cgi-bin/carddisp.pl?gene=SLC6A2">https://www.genecards.org/cgi-bin/carddisp.pl?gene=SLC6A2</a>     |
| PCBP2    | Poly(RC) Binding Protein 2                                    | Protein Coding | 48 | GC12P053452 | 3.630653381 | <a href="https://www.genecards.org/cgi-bin/carddisp.pl?gene=PCBP2">https://www.genecards.org/cgi-bin/carddisp.pl?gene=PCBP2</a>       |
| PIK3R2   | Phosphoinositide-3-Kinase Regulatory Subunit 2                | Protein Coding | 56 | GC19P018153 | 3.626128674 | <a href="https://www.genecards.org/cgi-bin/carddisp.pl?gene=PIK3R2">https://www.genecards.org/cgi-bin/carddisp.pl?gene=PIK3R2</a>     |
| ACOT2    | Acyl-CoA Thioesterase 2                                       | Protein Coding | 44 | GC14P073567 | 3.625527143 | <a href="https://www.genecards.org/cgi-bin/carddisp.pl?gene=ACOT2">https://www.genecards.org/cgi-bin/carddisp.pl?gene=ACOT2</a>       |
| ACP3     | Acid Phosphatase 3                                            | Protein Coding | 50 | GC03P135034 | 3.619726658 | <a href="https://www.genecards.org/cgi-bin/carddisp.pl?gene=ACP3">https://www.genecards.org/cgi-bin/carddisp.pl?gene=ACP3</a>         |
| C4A      | Complement C4A (Rodgers Blood Group)                          | Protein Coding | 50 | GC06P092175 | 3.611579657 | <a href="https://www.genecards.org/cgi-bin/carddisp.pl?gene=C4A">https://www.genecards.org/cgi-bin/carddisp.pl?gene=C4A</a>           |

|         |                                                                           |                |    |             |             |                                                                                                                                     |
|---------|---------------------------------------------------------------------------|----------------|----|-------------|-------------|-------------------------------------------------------------------------------------------------------------------------------------|
| GPAT4   | Glycerol-3-Phosphate Acyltransferase 4                                    | Protein Coding | 44 | GC08P041577 | 3.610387325 | <a href="https://www.genecards.org/cgi-bin/carddisp.pl?gene=GPAT4">https://www.genecards.org/cgi-bin/carddisp.pl?gene=GPAT4</a>     |
| THPO    | Thrombopoietin                                                            | Protein Coding | 50 | GC03M184371 | 3.601413965 | <a href="https://www.genecards.org/cgi-bin/carddisp.pl?gene=THPO">https://www.genecards.org/cgi-bin/carddisp.pl?gene=THPO</a>       |
| HSD17B8 | Hydroxysteroid 17-Beta Dehydrogenase 8                                    | Protein Coding | 46 | GC06P092209 | 3.600556135 | <a href="https://www.genecards.org/cgi-bin/carddisp.pl?gene=HSD17B8">https://www.genecards.org/cgi-bin/carddisp.pl?gene=HSD17B8</a> |
| PGAM1   | Phosphoglycerate Mutase 1                                                 | Protein Coding | 51 | GC10P097426 | 3.594974279 | <a href="https://www.genecards.org/cgi-bin/carddisp.pl?gene=PGAM1">https://www.genecards.org/cgi-bin/carddisp.pl?gene=PGAM1</a>     |
| ANXA1   | Annexin A1                                                                | Protein Coding | 54 | GC09P073151 | 3.584882736 | <a href="https://www.genecards.org/cgi-bin/carddisp.pl?gene=ANXA1">https://www.genecards.org/cgi-bin/carddisp.pl?gene=ANXA1</a>     |
| CYP20A1 | Cytochrome P450 Family 20 Subfamily A Member 1                            | Protein Coding | 44 | GC02P203238 | 3.581699133 | <a href="https://www.genecards.org/cgi-bin/carddisp.pl?gene=CYP20A1">https://www.genecards.org/cgi-bin/carddisp.pl?gene=CYP20A1</a> |
| CD79B   | CD79b Molecule                                                            | Protein Coding | 54 | GC17M063928 | 3.581664562 | <a href="https://www.genecards.org/cgi-bin/carddisp.pl?gene=CD79B">https://www.genecards.org/cgi-bin/carddisp.pl?gene=CD79B</a>     |
| PLEK    | Pleckstrin                                                                | Protein Coding | 47 | GC02P068365 | 3.565039635 | <a href="https://www.genecards.org/cgi-bin/carddisp.pl?gene=PLEK">https://www.genecards.org/cgi-bin/carddisp.pl?gene=PLEK</a>       |
| UGT2B11 | UDP Glucuronosyltransferase Family 2 Member B11                           | Protein Coding | 44 | GC04M069199 | 3.564004183 | <a href="https://www.genecards.org/cgi-bin/carddisp.pl?gene=UGT2B11">https://www.genecards.org/cgi-bin/carddisp.pl?gene=UGT2B11</a> |
| NOX4    | NADPH Oxidase 4                                                           | Protein Coding | 50 | GC11M089324 | 3.563686609 | <a href="https://www.genecards.org/cgi-bin/carddisp.pl?gene=NOX4">https://www.genecards.org/cgi-bin/carddisp.pl?gene=NOX4</a>       |
| ATP2A3  | ATPase Sarcoplasmic/Endoplasmic Reticulum Ca <sup>2+</sup> Transporting 3 | Protein Coding | 52 | GC17M003923 | 3.559276819 | <a href="https://www.genecards.org/cgi-bin/carddisp.pl?gene=ATP2A3">https://www.genecards.org/cgi-bin/carddisp.pl?gene=ATP2A3</a>   |
| SOCS1   | Suppressor Of Cytokine Signaling 1                                        | Protein Coding | 52 | GC16M012467 | 3.558186293 | <a href="https://www.genecards.org/cgi-bin/carddisp.pl?gene=SOCS1">https://www.genecards.org/cgi-bin/carddisp.pl?gene=SOCS1</a>     |
| TRH     | Thyrotropin Releasing Hormone                                             | Protein Coding | 48 | GC03P129974 | 3.556975603 | <a href="https://www.genecards.org/cgi-bin/carddisp.pl?gene=TRH">https://www.genecards.org/cgi-bin/carddisp.pl?gene=TRH</a>         |
| CA1     | Carbonic Anhydrase 1                                                      | Protein Coding | 54 | GC08M085327 | 3.556869507 | <a href="https://www.genecards.org/cgi-bin/carddisp.pl?gene=CA1">https://www.genecards.org/cgi-bin/carddisp.pl?gene=CA1</a>         |
| NR4A3   | Nuclear Receptor Subfamily 4 Group A Member 3                             | Protein Coding | 49 | GC09P099821 | 3.555757046 | <a href="https://www.genecards.org/cgi-bin/carddisp.pl?gene=NR4A3">https://www.genecards.org/cgi-bin/carddisp.pl?gene=NR4A3</a>     |

|         |                                                      |                |    |             |             |                                                                                                                                     |
|---------|------------------------------------------------------|----------------|----|-------------|-------------|-------------------------------------------------------------------------------------------------------------------------------------|
| PRDX6   | Peroxiredoxin 6                                      | Protein Coding | 53 | GC01P173477 | 3.552488565 | <a href="https://www.genecards.org/cgi-bin/carddisp.pl?gene=PRDX6">https://www.genecards.org/cgi-bin/carddisp.pl?gene=PRDX6</a>     |
| SH2B1   | SH2B Adaptor Protein 1                               | Protein Coding | 48 | GC16P042648 | 3.546960115 | <a href="https://www.genecards.org/cgi-bin/carddisp.pl?gene=SH2B1">https://www.genecards.org/cgi-bin/carddisp.pl?gene=SH2B1</a>     |
| GRIK2   | Glutamate Ionotropic Receptor Kainate Type Subunit 2 | Protein Coding | 56 | GC06P100962 | 3.546540976 | <a href="https://www.genecards.org/cgi-bin/carddisp.pl?gene=GRIK2">https://www.genecards.org/cgi-bin/carddisp.pl?gene=GRIK2</a>     |
| SPARC   | Secreted Protein Acidic And Cysteine Rich            | Protein Coding | 56 | GC05M151661 | 3.546322346 | <a href="https://www.genecards.org/cgi-bin/carddisp.pl?gene=SPARC">https://www.genecards.org/cgi-bin/carddisp.pl?gene=SPARC</a>     |
| TGFB2   | Transforming Growth Factor Beta 2                    | Protein Coding | 58 | GC01P218345 | 3.546247482 | <a href="https://www.genecards.org/cgi-bin/carddisp.pl?gene=TGFB2">https://www.genecards.org/cgi-bin/carddisp.pl?gene=TGFB2</a>     |
| SCT     | Secretin                                             | Protein Coding | 39 | GC11M000626 | 3.542740107 | <a href="https://www.genecards.org/cgi-bin/carddisp.pl?gene=SCT">https://www.genecards.org/cgi-bin/carddisp.pl?gene=SCT</a>         |
| ACSM6   | Acyl-CoA Synthetase Medium Chain Family Member 6     | Protein Coding | 37 | GC10P095194 | 3.540477037 | <a href="https://www.genecards.org/cgi-bin/carddisp.pl?gene=ACSM6">https://www.genecards.org/cgi-bin/carddisp.pl?gene=ACSM6</a>     |
| STAT5A  | Signal Transducer And Activator Of Transcription 5A  | Protein Coding | 55 | GC17P042287 | 3.540235758 | <a href="https://www.genecards.org/cgi-bin/carddisp.pl?gene=STAT5A">https://www.genecards.org/cgi-bin/carddisp.pl?gene=STAT5A</a>   |
| ELOVL6  | ELOVL Fatty Acid Elongase 6                          | Protein Coding | 48 | GC04M110045 | 3.538087368 | <a href="https://www.genecards.org/cgi-bin/carddisp.pl?gene=ELOVL6">https://www.genecards.org/cgi-bin/carddisp.pl?gene=ELOVL6</a>   |
| TBXA2R  | Thromboxane A2 Receptor                              | Protein Coding | 56 | GC19M003594 | 3.5368433   | <a href="https://www.genecards.org/cgi-bin/carddisp.pl?gene=TBXA2R">https://www.genecards.org/cgi-bin/carddisp.pl?gene=TBXA2R</a>   |
| LYN     | LYN Proto-Oncogene, Src Family Tyrosine Kinase       | Protein Coding | 55 | GC08P055879 | 3.53446126  | <a href="https://www.genecards.org/cgi-bin/carddisp.pl?gene=LYN">https://www.genecards.org/cgi-bin/carddisp.pl?gene=LYN</a>         |
| AKR1B15 | Aldo-Keto Reductase Family 1 Member B15              | Protein Coding | 37 | GC07P134549 | 3.529265165 | <a href="https://www.genecards.org/cgi-bin/carddisp.pl?gene=AKR1B15">https://www.genecards.org/cgi-bin/carddisp.pl?gene=AKR1B15</a> |
| F8      | Coagulation Factor VIII                              | Protein Coding | 54 | GC0XM154835 | 3.527348995 | <a href="https://www.genecards.org/cgi-bin/carddisp.pl?gene=F8">https://www.genecards.org/cgi-bin/carddisp.pl?gene=F8</a>           |
| LGALS1  | Galectin 1                                           | Protein Coding | 50 | GC22P037675 | 3.524164677 | <a href="https://www.genecards.org/cgi-bin/carddisp.pl?gene=LGALS1">https://www.genecards.org/cgi-bin/carddisp.pl?gene=LGALS1</a>   |
| UGT2B28 | UDP Glucuronosyltransferase Family 2 Member B28      | Protein Coding | 45 | GC04P069280 | 3.52409482  | <a href="https://www.genecards.org/cgi-bin/carddisp.pl?gene=UGT2B28">https://www.genecards.org/cgi-bin/carddisp.pl?gene=UGT2B28</a> |

|         |                                               |                |    |             |             |                                                                                                                                     |
|---------|-----------------------------------------------|----------------|----|-------------|-------------|-------------------------------------------------------------------------------------------------------------------------------------|
| SLC27A5 | Solute Carrier Family 27 Member 5             | Protein Coding | 48 | GC19M058479 | 3.523803711 | <a href="https://www.genecards.org/cgi-bin/carddisp.pl?gene=SLC27A5">https://www.genecards.org/cgi-bin/carddisp.pl?gene=SLC27A5</a> |
| LGALS3  | Galectin 3                                    | Protein Coding | 52 | GC14P055124 | 3.522946119 | <a href="https://www.genecards.org/cgi-bin/carddisp.pl?gene=LGALS3">https://www.genecards.org/cgi-bin/carddisp.pl?gene=LGALS3</a>   |
| EEF2    | Eukaryotic Translation Elongation Factor 2    | Protein Coding | 55 | GC19M003976 | 3.522862434 | <a href="https://www.genecards.org/cgi-bin/carddisp.pl?gene=EEF2">https://www.genecards.org/cgi-bin/carddisp.pl?gene=EEF2</a>       |
| CGA     | Glycoprotein Hormones, Alpha Polypeptide      | Protein Coding | 51 | GC06M087085 | 3.522000551 | <a href="https://www.genecards.org/cgi-bin/carddisp.pl?gene=CGA">https://www.genecards.org/cgi-bin/carddisp.pl?gene=CGA</a>         |
| HAO1    | Hydroxyacid Oxidase 1                         | Protein Coding | 48 | GC20M008508 | 3.519673824 | <a href="https://www.genecards.org/cgi-bin/carddisp.pl?gene=HAO1">https://www.genecards.org/cgi-bin/carddisp.pl?gene=HAO1</a>       |
| CD34    | CD34 Molecule                                 | Protein Coding | 52 | GC01M207880 | 3.518568277 | <a href="https://www.genecards.org/cgi-bin/carddisp.pl?gene=CD34">https://www.genecards.org/cgi-bin/carddisp.pl?gene=CD34</a>       |
| TOP1    | DNA Topoisomerase I                           | Protein Coding | 55 | GC20P041028 | 3.516348362 | <a href="https://www.genecards.org/cgi-bin/carddisp.pl?gene=TOP1">https://www.genecards.org/cgi-bin/carddisp.pl?gene=TOP1</a>       |
| PSMC6   | Proteasome 26S Subunit, ATPase 6              | Protein Coding | 46 | GC14P052707 | 3.516238689 | <a href="https://www.genecards.org/cgi-bin/carddisp.pl?gene=PSMC6">https://www.genecards.org/cgi-bin/carddisp.pl?gene=PSMC6</a>     |
| HAS2    | Hyaluronan Synthase 2                         | Protein Coding | 47 | GC08M121594 | 3.513864279 | <a href="https://www.genecards.org/cgi-bin/carddisp.pl?gene=HAS2">https://www.genecards.org/cgi-bin/carddisp.pl?gene=HAS2</a>       |
| HSPA1A  | Heat Shock Protein Family A (Hsp70) Member 1A | Protein Coding | 53 | GC06P092171 | 3.513021469 | <a href="https://www.genecards.org/cgi-bin/carddisp.pl?gene=HSPA1A">https://www.genecards.org/cgi-bin/carddisp.pl?gene=HSPA1A</a>   |
| DLK1    | Delta Like Non-Canonical Notch Ligand 1       | Protein Coding | 51 | GC14P110708 | 3.512380123 | <a href="https://www.genecards.org/cgi-bin/carddisp.pl?gene=DLK1">https://www.genecards.org/cgi-bin/carddisp.pl?gene=DLK1</a>       |
| UBC     | Ubiquitin C                                   | Protein Coding | 49 | GC12M124911 | 3.51091814  | <a href="https://www.genecards.org/cgi-bin/carddisp.pl?gene=UBC">https://www.genecards.org/cgi-bin/carddisp.pl?gene=UBC</a>         |
| AGRN    | Agrin                                         | Protein Coding | 52 | GC01P001020 | 3.509435892 | <a href="https://www.genecards.org/cgi-bin/carddisp.pl?gene=AGRN">https://www.genecards.org/cgi-bin/carddisp.pl?gene=AGRN</a>       |
| CA8     | Carbonic Anhydrase 8                          | Protein Coding | 53 | GC08M060187 | 3.495261669 | <a href="https://www.genecards.org/cgi-bin/carddisp.pl?gene=CA8">https://www.genecards.org/cgi-bin/carddisp.pl?gene=CA8</a>         |
| HNRNPU  | Heterogeneous Nuclear Ribonucleoprotein U     | Protein Coding | 50 | GC01M244844 | 3.492166042 | <a href="https://www.genecards.org/cgi-bin/carddisp.pl?gene=HNRNPU">https://www.genecards.org/cgi-bin/carddisp.pl?gene=HNRNPU</a>   |

|         |                                                      |                |    |             |             |                                                                                                                                     |
|---------|------------------------------------------------------|----------------|----|-------------|-------------|-------------------------------------------------------------------------------------------------------------------------------------|
| TOP2A   | DNA Topoisomerase II Alpha                           | Protein Coding | 57 | GC17M040388 | 3.486743212 | <a href="https://www.genecards.org/cgi-bin/carddisp.pl?gene=TOP2A">https://www.genecards.org/cgi-bin/carddisp.pl?gene=TOP2A</a>     |
| TNFSF10 | TNF Superfamily Member 10                            | Protein Coding | 51 | GC03M172505 | 3.47996521  | <a href="https://www.genecards.org/cgi-bin/carddisp.pl?gene=TNFSF10">https://www.genecards.org/cgi-bin/carddisp.pl?gene=TNFSF10</a> |
| INPP5J  | Inositol Polyphosphate-5-Phosphatase J               | Protein Coding | 48 | GC22P044897 | 3.474000692 | <a href="https://www.genecards.org/cgi-bin/carddisp.pl?gene=INPP5J">https://www.genecards.org/cgi-bin/carddisp.pl?gene=INPP5J</a>   |
| SLC22A1 | Solute Carrier Family 22 Member 1                    | Protein Coding | 51 | GC06P160121 | 3.473587513 | <a href="https://www.genecards.org/cgi-bin/carddisp.pl?gene=SLC22A1">https://www.genecards.org/cgi-bin/carddisp.pl?gene=SLC22A1</a> |
| HMGB1   | High Mobility Group Box 1                            | Protein Coding | 54 | GC13M030456 | 3.468208075 | <a href="https://www.genecards.org/cgi-bin/carddisp.pl?gene=HMGB1">https://www.genecards.org/cgi-bin/carddisp.pl?gene=HMGB1</a>     |
| MYH9    | Myosin Heavy Chain 9                                 | Protein Coding | 55 | GC22M036281 | 3.46468854  | <a href="https://www.genecards.org/cgi-bin/carddisp.pl?gene=MYH9">https://www.genecards.org/cgi-bin/carddisp.pl?gene=MYH9</a>       |
| OLR1    | Oxidized Low Density Lipoprotein Receptor 1          | Protein Coding | 50 | GC12M022629 | 3.458401203 | <a href="https://www.genecards.org/cgi-bin/carddisp.pl?gene=OLR1">https://www.genecards.org/cgi-bin/carddisp.pl?gene=OLR1</a>       |
| GP1BA   | Glycoprotein Ib Platelet Subunit Alpha               | Protein Coding | 54 | GC17P004932 | 3.456385374 | <a href="https://www.genecards.org/cgi-bin/carddisp.pl?gene=GP1BA">https://www.genecards.org/cgi-bin/carddisp.pl?gene=GP1BA</a>     |
| GRIK1   | Glutamate Ionotropic Receptor Kainate Type Subunit 1 | Protein Coding | 53 | GC21M029536 | 3.454291821 | <a href="https://www.genecards.org/cgi-bin/carddisp.pl?gene=GRIK1">https://www.genecards.org/cgi-bin/carddisp.pl?gene=GRIK1</a>     |
| ERBB4   | Erb-B2 Receptor Tyrosine Kinase 4                    | Protein Coding | 61 | GC02M211375 | 3.447304487 | <a href="https://www.genecards.org/cgi-bin/carddisp.pl?gene=ERBB4">https://www.genecards.org/cgi-bin/carddisp.pl?gene=ERBB4</a>     |
| NFKB2   | Nuclear Factor Kappa B Subunit 2                     | Protein Coding | 59 | GC10P102394 | 3.43983674  | <a href="https://www.genecards.org/cgi-bin/carddisp.pl?gene=NFKB2">https://www.genecards.org/cgi-bin/carddisp.pl?gene=NFKB2</a>     |
| ELOVL4  | ELOVL Fatty Acid Elongase 4                          | Protein Coding | 52 | GC06M079914 | 3.439374208 | <a href="https://www.genecards.org/cgi-bin/carddisp.pl?gene=ELOVL4">https://www.genecards.org/cgi-bin/carddisp.pl?gene=ELOVL4</a>   |
| CD28    | CD28 Molecule                                        | Protein Coding | 55 | GC02P203706 | 3.433174372 | <a href="https://www.genecards.org/cgi-bin/carddisp.pl?gene=CD28">https://www.genecards.org/cgi-bin/carddisp.pl?gene=CD28</a>       |
| THEM5   | Thioesterase Superfamily Member 5                    | Protein Coding | 41 | GC01M152803 | 3.431970835 | <a href="https://www.genecards.org/cgi-bin/carddisp.pl?gene=THEM5">https://www.genecards.org/cgi-bin/carddisp.pl?gene=THEM5</a>     |
| PDZK1   | PDZ Domain Containing 1                              | Protein Coding | 47 | GC01M145670 | 3.431917667 | <a href="https://www.genecards.org/cgi-bin/carddisp.pl?gene=PDZK1">https://www.genecards.org/cgi-bin/carddisp.pl?gene=PDZK1</a>     |

|         |                                                                |                |    |             |             |                                                                                                                                     |
|---------|----------------------------------------------------------------|----------------|----|-------------|-------------|-------------------------------------------------------------------------------------------------------------------------------------|
| SLC51A  | Solute Carrier Family 51 Subunit Alpha                         | Protein Coding | 45 | GC03P196211 | 3.431206226 | <a href="https://www.genecards.org/cgi-bin/carddisp.pl?gene=SLC51A">https://www.genecards.org/cgi-bin/carddisp.pl?gene=SLC51A</a>   |
| ATF3    | Activating Transcription Factor 3                              | Protein Coding | 51 | GC01P212565 | 3.43088913  | <a href="https://www.genecards.org/cgi-bin/carddisp.pl?gene=ATF3">https://www.genecards.org/cgi-bin/carddisp.pl?gene=ATF3</a>       |
| PKD1    | Polycystin 1, Transient Receptor Potential Channel Interacting | Protein Coding | 52 | GC16M008093 | 3.430216074 | <a href="https://www.genecards.org/cgi-bin/carddisp.pl?gene=PKD1">https://www.genecards.org/cgi-bin/carddisp.pl?gene=PKD1</a>       |
| HARS1   | Histidyl-TRNA Synthetase 1                                     | Protein Coding | 51 | GC05M140673 | 3.425354958 | <a href="https://www.genecards.org/cgi-bin/carddisp.pl?gene=HARS1">https://www.genecards.org/cgi-bin/carddisp.pl?gene=HARS1</a>     |
| COL1A2  | Collagen Type 1 Alpha 2 Chain                                  | Protein Coding | 54 | GC07P094394 | 3.421122074 | <a href="https://www.genecards.org/cgi-bin/carddisp.pl?gene=COL1A2">https://www.genecards.org/cgi-bin/carddisp.pl?gene=COL1A2</a>   |
| FGB     | Fibrinogen Beta Chain                                          | Protein Coding | 53 | GC04P154604 | 3.418199778 | <a href="https://www.genecards.org/cgi-bin/carddisp.pl?gene=FGB">https://www.genecards.org/cgi-bin/carddisp.pl?gene=FGB</a>         |
| CEACAM5 | CEA Cell Adhesion Molecule 5                                   | Protein Coding | 50 | GC19P072938 | 3.411329746 | <a href="https://www.genecards.org/cgi-bin/carddisp.pl?gene=CEACAM5">https://www.genecards.org/cgi-bin/carddisp.pl?gene=CEACAM5</a> |
| CDKN1B  | Cyclin Dependent Kinase Inhibitor 1B                           | Protein Coding | 54 | GC12P023759 | 3.411257982 | <a href="https://www.genecards.org/cgi-bin/carddisp.pl?gene=CDKN1B">https://www.genecards.org/cgi-bin/carddisp.pl?gene=CDKN1B</a>   |
| PSMB8   | Proteasome 20S Subunit Beta 8                                  | Protein Coding | 56 | GC06M032840 | 3.408988237 | <a href="https://www.genecards.org/cgi-bin/carddisp.pl?gene=PSMB8">https://www.genecards.org/cgi-bin/carddisp.pl?gene=PSMB8</a>     |
| DRD1    | Dopamine Receptor D1                                           | Protein Coding | 51 | GC05M175440 | 3.405468225 | <a href="https://www.genecards.org/cgi-bin/carddisp.pl?gene=DRD1">https://www.genecards.org/cgi-bin/carddisp.pl?gene=DRD1</a>       |
| IL11    | Interleukin 11                                                 | Protein Coding | 47 | GC19M055364 | 3.404547215 | <a href="https://www.genecards.org/cgi-bin/carddisp.pl?gene=IL11">https://www.genecards.org/cgi-bin/carddisp.pl?gene=IL11</a>       |
| SLC8A1  | Solute Carrier Family 8 Member A1                              | Protein Coding | 51 | GC02M040078 | 3.403540134 | <a href="https://www.genecards.org/cgi-bin/carddisp.pl?gene=SLC8A1">https://www.genecards.org/cgi-bin/carddisp.pl?gene=SLC8A1</a>   |
| HDAC4   | Histone Deacetylase 4                                          | Protein Coding | 59 | GC02M239048 | 3.39973402  | <a href="https://www.genecards.org/cgi-bin/carddisp.pl?gene=HDAC4">https://www.genecards.org/cgi-bin/carddisp.pl?gene=HDAC4</a>     |
| PTPN2   | Protein Tyrosine Phosphatase Non-Receptor Type 2               | Protein Coding | 54 | GC18M027584 | 3.393139839 | <a href="https://www.genecards.org/cgi-bin/carddisp.pl?gene=PTPN2">https://www.genecards.org/cgi-bin/carddisp.pl?gene=PTPN2</a>     |
| MMP14   | Matrix Metalloproteinase 14                                    | Protein Coding | 57 | GC14P034667 | 3.391114712 | <a href="https://www.genecards.org/cgi-bin/carddisp.pl?gene=MMP14">https://www.genecards.org/cgi-bin/carddisp.pl?gene=MMP14</a>     |

|         |                                                     |                |    |             |             |                                                                                                                                     |
|---------|-----------------------------------------------------|----------------|----|-------------|-------------|-------------------------------------------------------------------------------------------------------------------------------------|
| YARS1   | Tyrosyl-TRNA Synthetase 1                           | Protein Coding | 50 | GC01M032776 | 3.390839338 | <a href="https://www.genecards.org/cgi-bin/carddisp.pl?gene=YARS1">https://www.genecards.org/cgi-bin/carddisp.pl?gene=YARS1</a>     |
| PRLR    | Prolactin Receptor                                  | Protein Coding | 56 | GC05M035048 | 3.390128136 | <a href="https://www.genecards.org/cgi-bin/carddisp.pl?gene=PRLR">https://www.genecards.org/cgi-bin/carddisp.pl?gene=PRLR</a>       |
| TUBB    | Tubulin Beta Class I                                | Protein Coding | 57 | GC06P092134 | 3.388349056 | <a href="https://www.genecards.org/cgi-bin/carddisp.pl?gene=TUBB">https://www.genecards.org/cgi-bin/carddisp.pl?gene=TUBB</a>       |
| IRF1    | Interferon Regulatory Factor 1                      | Protein Coding | 53 | GC05M132440 | 3.387298346 | <a href="https://www.genecards.org/cgi-bin/carddisp.pl?gene=IRF1">https://www.genecards.org/cgi-bin/carddisp.pl?gene=IRF1</a>       |
| PABPC1  | Poly(A) Binding Protein Cytoplasmic 1               | Protein Coding | 49 | GC08M100685 | 3.384418249 | <a href="https://www.genecards.org/cgi-bin/carddisp.pl?gene=PABPC1">https://www.genecards.org/cgi-bin/carddisp.pl?gene=PABPC1</a>   |
| BCL2L1  | BCL2 Like 1                                         | Protein Coding | 55 | GC20M031664 | 3.38163662  | <a href="https://www.genecards.org/cgi-bin/carddisp.pl?gene=BCL2L1">https://www.genecards.org/cgi-bin/carddisp.pl?gene=BCL2L1</a>   |
| CYBB    | Cytochrome B-245 Beta Chain                         | Protein Coding | 56 | GC0XP037780 | 3.380608082 | <a href="https://www.genecards.org/cgi-bin/carddisp.pl?gene=CYBB">https://www.genecards.org/cgi-bin/carddisp.pl?gene=CYBB</a>       |
| OXTR    | Oxytocin Receptor                                   | Protein Coding | 53 | GC03M008767 | 3.37797904  | <a href="https://www.genecards.org/cgi-bin/carddisp.pl?gene=OXTR">https://www.genecards.org/cgi-bin/carddisp.pl?gene=OXTR</a>       |
| CERS5   | Ceramide Synthase 5                                 | Protein Coding | 46 | GC12M050129 | 3.376144171 | <a href="https://www.genecards.org/cgi-bin/carddisp.pl?gene=CERS5">https://www.genecards.org/cgi-bin/carddisp.pl?gene=CERS5</a>     |
| AWAT2   | Acyl-CoA Wax Alcohol Acyltransferase 2              | Protein Coding | 38 | GC0XM070040 | 3.374199867 | <a href="https://www.genecards.org/cgi-bin/carddisp.pl?gene=AWAT2">https://www.genecards.org/cgi-bin/carddisp.pl?gene=AWAT2</a>     |
| RAC2    | Rac Family Small GTPase 2                           | Protein Coding | 58 | GC22M061462 | 3.370952129 | <a href="https://www.genecards.org/cgi-bin/carddisp.pl?gene=RAC2">https://www.genecards.org/cgi-bin/carddisp.pl?gene=RAC2</a>       |
| IGF2BP3 | Insulin Like Growth Factor 2 mRNA Binding Protein 3 | Protein Coding | 48 | GC07M023354 | 3.36882925  | <a href="https://www.genecards.org/cgi-bin/carddisp.pl?gene=IGF2BP3">https://www.genecards.org/cgi-bin/carddisp.pl?gene=IGF2BP3</a> |
| PBX1    | PBX Homeobox 1                                      | Protein Coding | 55 | GC01P164524 | 3.368083    | <a href="https://www.genecards.org/cgi-bin/carddisp.pl?gene=PBX1">https://www.genecards.org/cgi-bin/carddisp.pl?gene=PBX1</a>       |
| DLG1    | Discs Large MAGUK Scaffold Protein 1                | Protein Coding | 50 | GC03M197042 | 3.367190838 | <a href="https://www.genecards.org/cgi-bin/carddisp.pl?gene=DLG1">https://www.genecards.org/cgi-bin/carddisp.pl?gene=DLG1</a>       |
| HSP90B1 | Heat Shock Protein 90 Beta Family Member 1          | Protein Coding | 53 | GC12P103930 | 3.367063761 | <a href="https://www.genecards.org/cgi-bin/carddisp.pl?gene=HSP90B1">https://www.genecards.org/cgi-bin/carddisp.pl?gene=HSP90B1</a> |

|         |                                                    |                |    |             |             |                                                                                                                                     |
|---------|----------------------------------------------------|----------------|----|-------------|-------------|-------------------------------------------------------------------------------------------------------------------------------------|
| SLC38A3 | Solute Carrier Family 38 Member 3                  | Protein Coding | 45 | GC03P050205 | 3.364940166 | <a href="https://www.genecards.org/cgi-bin/carddisp.pl?gene=SLC38A3">https://www.genecards.org/cgi-bin/carddisp.pl?gene=SLC38A3</a> |
| RHD     | Rh Blood Group D Antigen                           | Protein Coding | 48 | GC01P025272 | 3.362401962 | <a href="https://www.genecards.org/cgi-bin/carddisp.pl?gene=RHD">https://www.genecards.org/cgi-bin/carddisp.pl?gene=RHD</a>         |
| PLD2    | Phospholipase D2                                   | Protein Coding | 53 | GC17P004808 | 3.361949444 | <a href="https://www.genecards.org/cgi-bin/carddisp.pl?gene=PLD2">https://www.genecards.org/cgi-bin/carddisp.pl?gene=PLD2</a>       |
| PIM1    | Pim-1 Proto-Oncogene, Serine/Threonine Kinase      | Protein Coding | 56 | GC06P092302 | 3.3618958   | <a href="https://www.genecards.org/cgi-bin/carddisp.pl?gene=PIM1">https://www.genecards.org/cgi-bin/carddisp.pl?gene=PIM1</a>       |
| CDH13   | Cadherin 13                                        | Protein Coding | 51 | GC16P082626 | 3.359909773 | <a href="https://www.genecards.org/cgi-bin/carddisp.pl?gene=CDH13">https://www.genecards.org/cgi-bin/carddisp.pl?gene=CDH13</a>     |
| PTPRC   | Protein Tyrosine Phosphatase Receptor Type C       | Protein Coding | 59 | GC01P198607 | 3.355715752 | <a href="https://www.genecards.org/cgi-bin/carddisp.pl?gene=PTPRC">https://www.genecards.org/cgi-bin/carddisp.pl?gene=PTPRC</a>     |
| ESD     | Esterase D                                         | Protein Coding | 50 | GC13M046771 | 3.354079723 | <a href="https://www.genecards.org/cgi-bin/carddisp.pl?gene=ESD">https://www.genecards.org/cgi-bin/carddisp.pl?gene=ESD</a>         |
| GPBR1   | G Protein-Coupled Estrogen Receptor 1              | Protein Coding | 48 | GC07P003391 | 3.351549625 | <a href="https://www.genecards.org/cgi-bin/carddisp.pl?gene=GPBR1">https://www.genecards.org/cgi-bin/carddisp.pl?gene=GPBR1</a>     |
| MAP2K2  | Mitogen-Activated Protein Kinase Kinase 2          | Protein Coding | 61 | GC19M004090 | 3.350414038 | <a href="https://www.genecards.org/cgi-bin/carddisp.pl?gene=MAP2K2">https://www.genecards.org/cgi-bin/carddisp.pl?gene=MAP2K2</a>   |
| GRIP1   | Glutamate Receptor Interacting Protein 1           | Protein Coding | 50 | GC12M066347 | 3.350006342 | <a href="https://www.genecards.org/cgi-bin/carddisp.pl?gene=GRIP1">https://www.genecards.org/cgi-bin/carddisp.pl?gene=GRIP1</a>     |
| UCHL1   | Ubiquitin C-Terminal Hydrolase L1                  | Protein Coding | 59 | GC04P041256 | 3.342181206 | <a href="https://www.genecards.org/cgi-bin/carddisp.pl?gene=UCHL1">https://www.genecards.org/cgi-bin/carddisp.pl?gene=UCHL1</a>     |
| TP73    | Tumor Protein P73                                  | Protein Coding | 52 | GC01P003652 | 3.339853287 | <a href="https://www.genecards.org/cgi-bin/carddisp.pl?gene=TP73">https://www.genecards.org/cgi-bin/carddisp.pl?gene=TP73</a>       |
| EEF1A1  | Eukaryotic Translation Elongation Factor 1 Alpha 1 | Protein Coding | 50 | GC06M074523 | 3.338254929 | <a href="https://www.genecards.org/cgi-bin/carddisp.pl?gene=EEF1A1">https://www.genecards.org/cgi-bin/carddisp.pl?gene=EEF1A1</a>   |
| ELOVL5  | ELOVL Fatty Acid Elongase 5                        | Protein Coding | 51 | GC06M053267 | 3.337735653 | <a href="https://www.genecards.org/cgi-bin/carddisp.pl?gene=ELOVL5">https://www.genecards.org/cgi-bin/carddisp.pl?gene=ELOVL5</a>   |
| GRM7    | Glutamate Metabotropic Receptor 7                  | Protein Coding | 54 | GC03P006770 | 3.334997654 | <a href="https://www.genecards.org/cgi-bin/carddisp.pl?gene=GRM7">https://www.genecards.org/cgi-bin/carddisp.pl?gene=GRM7</a>       |

|         |                                                  |                |    |             |             |                                                                                                                                     |
|---------|--------------------------------------------------|----------------|----|-------------|-------------|-------------------------------------------------------------------------------------------------------------------------------------|
| HBEGF   | Heparin Binding EGF Like Growth Factor           | Protein Coding | 50 | GC05M140332 | 3.331227303 | <a href="https://www.genecards.org/cgi-bin/carddisp.pl?gene=HBEGF">https://www.genecards.org/cgi-bin/carddisp.pl?gene=HBEGF</a>     |
| SOS1    | SOS Ras/Rac Guanine Nucleotide Exchange Factor 1 | Protein Coding | 56 | GC02M039054 | 3.329431534 | <a href="https://www.genecards.org/cgi-bin/carddisp.pl?gene=SOS1">https://www.genecards.org/cgi-bin/carddisp.pl?gene=SOS1</a>       |
| BRS3    | Bombesin Receptor Subtype 3                      | Protein Coding | 48 | GC0XP136500 | 3.328694344 | <a href="https://www.genecards.org/cgi-bin/carddisp.pl?gene=BRS3">https://www.genecards.org/cgi-bin/carddisp.pl?gene=BRS3</a>       |
| CD59    | CD59 Molecule (CD59 Blood Group)                 | Protein Coding | 53 | GC11M033704 | 3.327222586 | <a href="https://www.genecards.org/cgi-bin/carddisp.pl?gene=CD59">https://www.genecards.org/cgi-bin/carddisp.pl?gene=CD59</a>       |
| CASP9   | Caspase 9                                        | Protein Coding | 53 | GC01M015491 | 3.326052904 | <a href="https://www.genecards.org/cgi-bin/carddisp.pl?gene=CASP9">https://www.genecards.org/cgi-bin/carddisp.pl?gene=CASP9</a>     |
| KRT8    | Keratin 8                                        | Protein Coding | 53 | GC12M052897 | 3.321171284 | <a href="https://www.genecards.org/cgi-bin/carddisp.pl?gene=KRT8">https://www.genecards.org/cgi-bin/carddisp.pl?gene=KRT8</a>       |
| OGA     | O-GlcNAcase                                      | Protein Coding | 47 | GC10M101785 | 3.319125414 | <a href="https://www.genecards.org/cgi-bin/carddisp.pl?gene=OGA">https://www.genecards.org/cgi-bin/carddisp.pl?gene=OGA</a>         |
| PDIA3   | Protein Disulfide Isomerase Family A Member 3    | Protein Coding | 51 | GC15P043746 | 3.316093206 | <a href="https://www.genecards.org/cgi-bin/carddisp.pl?gene=PDIA3">https://www.genecards.org/cgi-bin/carddisp.pl?gene=PDIA3</a>     |
| SLC18A2 | Solute Carrier Family 18 Member A2               | Protein Coding | 53 | GC10P117241 | 3.314780474 | <a href="https://www.genecards.org/cgi-bin/carddisp.pl?gene=SLC18A2">https://www.genecards.org/cgi-bin/carddisp.pl?gene=SLC18A2</a> |
| LIF     | LIF Interleukin 6 Family Cytokine                | Protein Coding | 50 | GC22M030240 | 3.313483238 | <a href="https://www.genecards.org/cgi-bin/carddisp.pl?gene=LIF">https://www.genecards.org/cgi-bin/carddisp.pl?gene=LIF</a>         |
| ADAM10  | ADAM Metallopeptidase Domain 10                  | Protein Coding | 60 | GC15M058588 | 3.312374353 | <a href="https://www.genecards.org/cgi-bin/carddisp.pl?gene=ADAM10">https://www.genecards.org/cgi-bin/carddisp.pl?gene=ADAM10</a>   |
| HTR3A   | 5-Hydroxytryptamine Receptor 3A                  | Protein Coding | 53 | GC11P113975 | 3.311017513 | <a href="https://www.genecards.org/cgi-bin/carddisp.pl?gene=HTR3A">https://www.genecards.org/cgi-bin/carddisp.pl?gene=HTR3A</a>     |
| PDE3A   | Phosphodiesterase 3A                             | Protein Coding | 56 | GC12P023897 | 3.31002903  | <a href="https://www.genecards.org/cgi-bin/carddisp.pl?gene=PDE3A">https://www.genecards.org/cgi-bin/carddisp.pl?gene=PDE3A</a>     |
| ACTN4   | Actinin Alpha 4                                  | Protein Coding | 53 | GC19P038647 | 3.30234313  | <a href="https://www.genecards.org/cgi-bin/carddisp.pl?gene=ACTN4">https://www.genecards.org/cgi-bin/carddisp.pl?gene=ACTN4</a>     |
| PDGFRA  | Platelet Derived Growth Factor Receptor Alpha    | Protein Coding | 60 | GC04P054229 | 3.300298452 | <a href="https://www.genecards.org/cgi-bin/carddisp.pl?gene=PDGFRA">https://www.genecards.org/cgi-bin/carddisp.pl?gene=PDGFRA</a>   |

|        |                                                |                |    |             |             |                                                                                                                                   |
|--------|------------------------------------------------|----------------|----|-------------|-------------|-----------------------------------------------------------------------------------------------------------------------------------|
| CD5    | CD5 Molecule                                   | Protein Coding | 49 | GC11P061118 | 3.298510313 | <a href="https://www.genecards.org/cgi-bin/carddisp.pl?gene=CD5">https://www.genecards.org/cgi-bin/carddisp.pl?gene=CD5</a>       |
| MKKS   | MKKS Centrosomal Shuttling Protein             | Protein Coding | 46 | GC20M010424 | 3.296190262 | <a href="https://www.genecards.org/cgi-bin/carddisp.pl?gene=MKKS">https://www.genecards.org/cgi-bin/carddisp.pl?gene=MKKS</a>     |
| MBP    | Myelin Basic Protein                           | Protein Coding | 51 | GC18M076978 | 3.292306185 | <a href="https://www.genecards.org/cgi-bin/carddisp.pl?gene=MBP">https://www.genecards.org/cgi-bin/carddisp.pl?gene=MBP</a>       |
| GATA1  | GATA Binding Protein 1                         | Protein Coding | 53 | GC0XP048786 | 3.289469004 | <a href="https://www.genecards.org/cgi-bin/carddisp.pl?gene=GATA1">https://www.genecards.org/cgi-bin/carddisp.pl?gene=GATA1</a>   |
| PRLH   | Prolactin Releasing Hormone                    | Protein Coding | 37 | GC02P237566 | 3.283510208 | <a href="https://www.genecards.org/cgi-bin/carddisp.pl?gene=PRLH">https://www.genecards.org/cgi-bin/carddisp.pl?gene=PRLH</a>     |
| FLT1   | Fms Related Receptor Tyrosine Kinase 1         | Protein Coding | 57 | GC13M028300 | 3.281445742 | <a href="https://www.genecards.org/cgi-bin/carddisp.pl?gene=FLT1">https://www.genecards.org/cgi-bin/carddisp.pl?gene=FLT1</a>     |
| NR4A1  | Nuclear Receptor Subfamily 4 Group A Member 1  | Protein Coding | 54 | GC12P052022 | 3.275763988 | <a href="https://www.genecards.org/cgi-bin/carddisp.pl?gene=NR4A1">https://www.genecards.org/cgi-bin/carddisp.pl?gene=NR4A1</a>   |
| DUSP1  | Dual Specificity Phosphatase 1                 | Protein Coding | 52 | GC05M172768 | 3.268606186 | <a href="https://www.genecards.org/cgi-bin/carddisp.pl?gene=DUSP1">https://www.genecards.org/cgi-bin/carddisp.pl?gene=DUSP1</a>   |
| NMT1   | N-Myristoyltransferase 1                       | Protein Coding | 50 | GC17P062083 | 3.262718201 | <a href="https://www.genecards.org/cgi-bin/carddisp.pl?gene=NMT1">https://www.genecards.org/cgi-bin/carddisp.pl?gene=NMT1</a>     |
| SMAD2  | SMAD Family Member 2                           | Protein Coding | 59 | GC18M047809 | 3.257688046 | <a href="https://www.genecards.org/cgi-bin/carddisp.pl?gene=SMAD2">https://www.genecards.org/cgi-bin/carddisp.pl?gene=SMAD2</a>   |
| F2RL1  | F2R Like Trypsin Receptor 1                    | Protein Coding | 51 | GC05P076818 | 3.256936073 | <a href="https://www.genecards.org/cgi-bin/carddisp.pl?gene=F2RL1">https://www.genecards.org/cgi-bin/carddisp.pl?gene=F2RL1</a>   |
| MT3    | Metallothionein 3                              | Protein Coding | 44 | GC16P056589 | 3.255939245 | <a href="https://www.genecards.org/cgi-bin/carddisp.pl?gene=MT3">https://www.genecards.org/cgi-bin/carddisp.pl?gene=MT3</a>       |
| AGPAT3 | 1-Acylglycerol-3-Phosphate O-Acyltransferase 3 | Protein Coding | 46 | GC21P043865 | 3.250079155 | <a href="https://www.genecards.org/cgi-bin/carddisp.pl?gene=AGPAT3">https://www.genecards.org/cgi-bin/carddisp.pl?gene=AGPAT3</a> |
| LRRK2  | Leucine Rich Repeat Kinase 2                   | Protein Coding | 56 | GC12P040196 | 3.246121168 | <a href="https://www.genecards.org/cgi-bin/carddisp.pl?gene=LRRK2">https://www.genecards.org/cgi-bin/carddisp.pl?gene=LRRK2</a>   |
| SGCB   | Sarcoglycan Beta                               | Protein Coding | 47 | GC04M052019 | 3.243461609 | <a href="https://www.genecards.org/cgi-bin/carddisp.pl?gene=SGCB">https://www.genecards.org/cgi-bin/carddisp.pl?gene=SGCB</a>     |

|        |                                                             |                |    |             |             |                                                                                                                                   |
|--------|-------------------------------------------------------------|----------------|----|-------------|-------------|-----------------------------------------------------------------------------------------------------------------------------------|
| CRHR2  | Corticotropin Releasing Hormone Receptor 2                  | Protein Coding | 50 | GC07M030651 | 3.241627216 | <a href="https://www.genecards.org/cgi-bin/carddisp.pl?gene=CRHR2">https://www.genecards.org/cgi-bin/carddisp.pl?gene=CRHR2</a>   |
| PROS1  | Protein S                                                   | Protein Coding | 55 | GC03M093873 | 3.237989426 | <a href="https://www.genecards.org/cgi-bin/carddisp.pl?gene=PROS1">https://www.genecards.org/cgi-bin/carddisp.pl?gene=PROS1</a>   |
| TRIM63 | Tripartite Motif Containing 63                              | Protein Coding | 48 | GC01M026066 | 3.235760689 | <a href="https://www.genecards.org/cgi-bin/carddisp.pl?gene=TRIM63">https://www.genecards.org/cgi-bin/carddisp.pl?gene=TRIM63</a> |
| IL16   | Interleukin 16                                              | Protein Coding | 48 | GC15P081159 | 3.232122421 | <a href="https://www.genecards.org/cgi-bin/carddisp.pl?gene=IL16">https://www.genecards.org/cgi-bin/carddisp.pl?gene=IL16</a>     |
| DRD3   | Dopamine Receptor D3                                        | Protein Coding | 51 | GC03M114128 | 3.227733612 | <a href="https://www.genecards.org/cgi-bin/carddisp.pl?gene=DRD3">https://www.genecards.org/cgi-bin/carddisp.pl?gene=DRD3</a>     |
| ALK    | ALK Receptor Tyrosine Kinase                                | Protein Coding | 59 | GC02M029190 | 3.226660728 | <a href="https://www.genecards.org/cgi-bin/carddisp.pl?gene=ALK">https://www.genecards.org/cgi-bin/carddisp.pl?gene=ALK</a>       |
| NF1    | Neurofibromin 1                                             | Protein Coding | 54 | GC17P031094 | 3.22521162  | <a href="https://www.genecards.org/cgi-bin/carddisp.pl?gene=NF1">https://www.genecards.org/cgi-bin/carddisp.pl?gene=NF1</a>       |
| BUD23  | BUD23 RRNA Methyltransferase And Ribosome Maturation Factor | Protein Coding | 44 | GC07P076357 | 3.224797249 | <a href="https://www.genecards.org/cgi-bin/carddisp.pl?gene=BUD23">https://www.genecards.org/cgi-bin/carddisp.pl?gene=BUD23</a>   |
| ATXN3  | Ataxin 3                                                    | Protein Coding | 52 | GC14M103083 | 3.224014997 | <a href="https://www.genecards.org/cgi-bin/carddisp.pl?gene=ATXN3">https://www.genecards.org/cgi-bin/carddisp.pl?gene=ATXN3</a>   |
| EIF4E  | Eukaryotic Translation Initiation Factor 4E                 | Protein Coding | 56 | GC04M098879 | 3.223826408 | <a href="https://www.genecards.org/cgi-bin/carddisp.pl?gene=EIF4E">https://www.genecards.org/cgi-bin/carddisp.pl?gene=EIF4E</a>   |
| JAK1   | Janus Kinase 1                                              | Protein Coding | 60 | GC01M064833 | 3.22107625  | <a href="https://www.genecards.org/cgi-bin/carddisp.pl?gene=JAK1">https://www.genecards.org/cgi-bin/carddisp.pl?gene=JAK1</a>     |
| SAT2   | Spermidine/Spermine N1-Acetyltransferase Family Member 2    | Protein Coding | 43 | GC17M007626 | 3.216407537 | <a href="https://www.genecards.org/cgi-bin/carddisp.pl?gene=SAT2">https://www.genecards.org/cgi-bin/carddisp.pl?gene=SAT2</a>     |
| CHRM3  | Cholinergic Receptor Muscarinic 3                           | Protein Coding | 55 | GC01P239386 | 3.215517282 | <a href="https://www.genecards.org/cgi-bin/carddisp.pl?gene=CHRM3">https://www.genecards.org/cgi-bin/carddisp.pl?gene=CHRM3</a>   |
| KRT14  | Keratin 14                                                  | Protein Coding | 53 | GC17M041582 | 3.214873791 | <a href="https://www.genecards.org/cgi-bin/carddisp.pl?gene=KRT14">https://www.genecards.org/cgi-bin/carddisp.pl?gene=KRT14</a>   |
| LALBA  | Lactalbumin Alpha                                           | Protein Coding | 45 | GC12M048567 | 3.212843418 | <a href="https://www.genecards.org/cgi-bin/carddisp.pl?gene=LALBA">https://www.genecards.org/cgi-bin/carddisp.pl?gene=LALBA</a>   |

|          |                                                                  |                |    |             |             |                                                                                                                                       |
|----------|------------------------------------------------------------------|----------------|----|-------------|-------------|---------------------------------------------------------------------------------------------------------------------------------------|
| TAC1     | Tachykinin Precursor 1                                           | Protein Coding | 48 | GC07P097731 | 3.212556362 | <a href="https://www.genecards.org/cgi-bin/carddisp.pl?gene=TAC1">https://www.genecards.org/cgi-bin/carddisp.pl?gene=TAC1</a>         |
| SMAD6    | SMAD Family Member 6                                             | Protein Coding | 53 | GC15P066702 | 3.210130453 | <a href="https://www.genecards.org/cgi-bin/carddisp.pl?gene=SMAD6">https://www.genecards.org/cgi-bin/carddisp.pl?gene=SMAD6</a>       |
| CYSLTR2  | Cysteinyl Leukotriene Receptor 2                                 | Protein Coding | 54 | GC13P048653 | 3.206436157 | <a href="https://www.genecards.org/cgi-bin/carddisp.pl?gene=CYSLTR2">https://www.genecards.org/cgi-bin/carddisp.pl?gene=CYSLTR2</a>   |
| MAG      | Myelin Associated Glycoprotein                                   | Protein Coding | 54 | GC19P035292 | 3.204558611 | <a href="https://www.genecards.org/cgi-bin/carddisp.pl?gene=MAG">https://www.genecards.org/cgi-bin/carddisp.pl?gene=MAG</a>           |
| KHDRBS3  | KH RNA Binding Domain Containing, Signal Transduction Associated | Protein Coding | 45 | GC08P135457 | 3.195662022 | <a href="https://www.genecards.org/cgi-bin/carddisp.pl?gene=KHDRBS3">https://www.genecards.org/cgi-bin/carddisp.pl?gene=KHDRBS3</a>   |
| ACTN1    | Actinin Alpha 1                                                  | Protein Coding | 56 | GC14M068874 | 3.193297863 | <a href="https://www.genecards.org/cgi-bin/carddisp.pl?gene=ACTN1">https://www.genecards.org/cgi-bin/carddisp.pl?gene=ACTN1</a>       |
| TTF2     | Transcription Termination Factor 2                               | Protein Coding | 46 | GC01P117060 | 3.191391945 | <a href="https://www.genecards.org/cgi-bin/carddisp.pl?gene=TTF2">https://www.genecards.org/cgi-bin/carddisp.pl?gene=TTF2</a>         |
| SLC22A8  | Solute Carrier Family 22 Member 8                                | Protein Coding | 49 | GC11M099608 | 3.190941095 | <a href="https://www.genecards.org/cgi-bin/carddisp.pl?gene=SLC22A8">https://www.genecards.org/cgi-bin/carddisp.pl?gene=SLC22A8</a>   |
| UBE3A    | Ubiquitin Protein Ligase E3A                                     | Protein Coding | 53 | GC15M025333 | 3.18576026  | <a href="https://www.genecards.org/cgi-bin/carddisp.pl?gene=UBE3A">https://www.genecards.org/cgi-bin/carddisp.pl?gene=UBE3A</a>       |
| CSF1R    | Colony Stimulating Factor 1 Receptor                             | Protein Coding | 59 | GC05M150053 | 3.183142424 | <a href="https://www.genecards.org/cgi-bin/carddisp.pl?gene=CSF1R">https://www.genecards.org/cgi-bin/carddisp.pl?gene=CSF1R</a>       |
| SLC1A2   | Solute Carrier Family 1 Member 2                                 | Protein Coding | 56 | GC11M035267 | 3.181488752 | <a href="https://www.genecards.org/cgi-bin/carddisp.pl?gene=SLC1A2">https://www.genecards.org/cgi-bin/carddisp.pl?gene=SLC1A2</a>     |
| ANG      | Angiogenin                                                       | Protein Coding | 51 | GC14P034388 | 3.176154375 | <a href="https://www.genecards.org/cgi-bin/carddisp.pl?gene=ANG">https://www.genecards.org/cgi-bin/carddisp.pl?gene=ANG</a>           |
| RPA2     | Replication Protein A2                                           | Protein Coding | 50 | GC01M028119 | 3.170302391 | <a href="https://www.genecards.org/cgi-bin/carddisp.pl?gene=RPA2">https://www.genecards.org/cgi-bin/carddisp.pl?gene=RPA2</a>         |
| SERPING1 | Serpin Family G Member 1                                         | Protein Coding | 54 | GC11P057597 | 3.169795513 | <a href="https://www.genecards.org/cgi-bin/carddisp.pl?gene=SERPING1">https://www.genecards.org/cgi-bin/carddisp.pl?gene=SERPING1</a> |
| PTGER3   | Prostaglandin E Receptor 3                                       | Protein Coding | 53 | GC01M070852 | 3.167470455 | <a href="https://www.genecards.org/cgi-bin/carddisp.pl?gene=PTGER3">https://www.genecards.org/cgi-bin/carddisp.pl?gene=PTGER3</a>     |

|         |                                                                        |                |    |             |             |                                                                                                                                     |
|---------|------------------------------------------------------------------------|----------------|----|-------------|-------------|-------------------------------------------------------------------------------------------------------------------------------------|
| JAK3    | Janus Kinase 3                                                         | Protein Coding | 58 | GC19M017824 | 3.165206909 | <a href="https://www.genecards.org/cgi-bin/carddisp.pl?gene=JAK3">https://www.genecards.org/cgi-bin/carddisp.pl?gene=JAK3</a>       |
| CDC42   | Cell Division Cycle 42                                                 | Protein Coding | 57 | GC01P022052 | 3.15984416  | <a href="https://www.genecards.org/cgi-bin/carddisp.pl?gene=CDC42">https://www.genecards.org/cgi-bin/carddisp.pl?gene=CDC42</a>     |
| WNT5A   | Wnt Family Member 5A                                                   | Protein Coding | 56 | GC03M055465 | 3.15939784  | <a href="https://www.genecards.org/cgi-bin/carddisp.pl?gene=WNT5A">https://www.genecards.org/cgi-bin/carddisp.pl?gene=WNT5A</a>     |
| S100A9  | S100 Calcium Binding Protein A9                                        | Protein Coding | 50 | GC01P153357 | 3.159015179 | <a href="https://www.genecards.org/cgi-bin/carddisp.pl?gene=S100A9">https://www.genecards.org/cgi-bin/carddisp.pl?gene=S100A9</a>   |
| CYGB    | Cytoglobin                                                             | Protein Coding | 45 | GC17M076527 | 3.154545784 | <a href="https://www.genecards.org/cgi-bin/carddisp.pl?gene=CYGB">https://www.genecards.org/cgi-bin/carddisp.pl?gene=CYGB</a>       |
| KMT2A   | Lysine Methyltransferase 2A                                            | Protein Coding | 54 | GC11P118436 | 3.151390553 | <a href="https://www.genecards.org/cgi-bin/carddisp.pl?gene=KMT2A">https://www.genecards.org/cgi-bin/carddisp.pl?gene=KMT2A</a>     |
| PDGFRL  | Platelet Derived Growth Factor Receptor Like                           | Protein Coding | 50 | GC08P017576 | 3.149273634 | <a href="https://www.genecards.org/cgi-bin/carddisp.pl?gene=PDGFRL">https://www.genecards.org/cgi-bin/carddisp.pl?gene=PDGFRL</a>   |
| GRK2    | G Protein-Coupled Receptor Kinase 2                                    | Protein Coding | 53 | GC11P067266 | 3.148638248 | <a href="https://www.genecards.org/cgi-bin/carddisp.pl?gene=GRK2">https://www.genecards.org/cgi-bin/carddisp.pl?gene=GRK2</a>       |
| KITLG   | KIT Ligand                                                             | Protein Coding | 53 | GC12M088492 | 3.148565292 | <a href="https://www.genecards.org/cgi-bin/carddisp.pl?gene=KITLG">https://www.genecards.org/cgi-bin/carddisp.pl?gene=KITLG</a>     |
| CDH2    | Cadherin 2                                                             | Protein Coding | 59 | GC18M028088 | 3.1409235   | <a href="https://www.genecards.org/cgi-bin/carddisp.pl?gene=CDH2">https://www.genecards.org/cgi-bin/carddisp.pl?gene=CDH2</a>       |
| CSNK2A2 | Casein Kinase 2 Alpha 2                                                | Protein Coding | 53 | GC16M058157 | 3.137202501 | <a href="https://www.genecards.org/cgi-bin/carddisp.pl?gene=CSNK2A2">https://www.genecards.org/cgi-bin/carddisp.pl?gene=CSNK2A2</a> |
| POMGNT2 | Protein O-Linked Mannose N-Acetylglucosaminyltransferase 2 (Beta 1,4-) | Protein Coding | 44 | GC03M043121 | 3.133676291 | <a href="https://www.genecards.org/cgi-bin/carddisp.pl?gene=POMGNT2">https://www.genecards.org/cgi-bin/carddisp.pl?gene=POMGNT2</a> |
| ANXA2   | Annexin A2                                                             | Protein Coding | 55 | GC15M060347 | 3.130560637 | <a href="https://www.genecards.org/cgi-bin/carddisp.pl?gene=ANXA2">https://www.genecards.org/cgi-bin/carddisp.pl?gene=ANXA2</a>     |
| DDR1    | Discoidin Domain Receptor Tyrosine Kinase 1                            | Protein Coding | 53 | GC06P092137 | 3.126752853 | <a href="https://www.genecards.org/cgi-bin/carddisp.pl?gene=DDR1">https://www.genecards.org/cgi-bin/carddisp.pl?gene=DDR1</a>       |
| CDK6    | Cyclin Dependent Kinase 6                                              | Protein Coding | 59 | GC07M092604 | 3.125250101 | <a href="https://www.genecards.org/cgi-bin/carddisp.pl?gene=CDK6">https://www.genecards.org/cgi-bin/carddisp.pl?gene=CDK6</a>       |

|         |                                                      |                |    |             |             |                                                                                                                                     |
|---------|------------------------------------------------------|----------------|----|-------------|-------------|-------------------------------------------------------------------------------------------------------------------------------------|
| MLN     | Motilin                                              | Protein Coding | 40 | GC06M033794 | 3.12496376  | <a href="https://www.genecards.org/cgi-bin/carddisp.pl?gene=MLN">https://www.genecards.org/cgi-bin/carddisp.pl?gene=MLN</a>         |
| GSN     | Gelsolin                                             | Protein Coding | 56 | GC09P121201 | 3.119424343 | <a href="https://www.genecards.org/cgi-bin/carddisp.pl?gene=GSN">https://www.genecards.org/cgi-bin/carddisp.pl?gene=GSN</a>         |
| PTCH1   | Patched 1                                            | Protein Coding | 57 | GC09M095442 | 3.118463278 | <a href="https://www.genecards.org/cgi-bin/carddisp.pl?gene=PTCH1">https://www.genecards.org/cgi-bin/carddisp.pl?gene=PTCH1</a>     |
| SCG5    | Secretogranin V                                      | Protein Coding | 43 | GC15P032641 | 3.115576029 | <a href="https://www.genecards.org/cgi-bin/carddisp.pl?gene=SCG5">https://www.genecards.org/cgi-bin/carddisp.pl?gene=SCG5</a>       |
| ITPR1   | Inositol 1,4,5-Trisphosphate Receptor Type 1         | Protein Coding | 55 | GC03P004486 | 3.114220381 | <a href="https://www.genecards.org/cgi-bin/carddisp.pl?gene=ITPR1">https://www.genecards.org/cgi-bin/carddisp.pl?gene=ITPR1</a>     |
| ELOVL7  | ELOVL Fatty Acid Elongase 7                          | Protein Coding | 44 | GC05M060751 | 3.107929945 | <a href="https://www.genecards.org/cgi-bin/carddisp.pl?gene=ELOVL7">https://www.genecards.org/cgi-bin/carddisp.pl?gene=ELOVL7</a>   |
| CPQ     | Carboxypeptidase Q                                   | Protein Coding | 44 | GC08P096645 | 3.10552454  | <a href="https://www.genecards.org/cgi-bin/carddisp.pl?gene=CPQ">https://www.genecards.org/cgi-bin/carddisp.pl?gene=CPQ</a>         |
| STC2    | Stanniocalcin 2                                      | Protein Coding | 48 | GC05M173314 | 3.101755142 | <a href="https://www.genecards.org/cgi-bin/carddisp.pl?gene=STC2">https://www.genecards.org/cgi-bin/carddisp.pl?gene=STC2</a>       |
| SLC15A1 | Solute Carrier Family 15 Member 1                    | Protein Coding | 50 | GC13M098683 | 3.098032951 | <a href="https://www.genecards.org/cgi-bin/carddisp.pl?gene=SLC15A1">https://www.genecards.org/cgi-bin/carddisp.pl?gene=SLC15A1</a> |
| CA10    | Carbonic Anhydrase 10                                | Protein Coding | 46 | GC17M051630 | 3.09686017  | <a href="https://www.genecards.org/cgi-bin/carddisp.pl?gene=CA10">https://www.genecards.org/cgi-bin/carddisp.pl?gene=CA10</a>       |
| TPR     | Translocated Promoter Region, Nuclear Basket Protein | Protein Coding | 50 | GC01M186323 | 3.096314192 | <a href="https://www.genecards.org/cgi-bin/carddisp.pl?gene=TPR">https://www.genecards.org/cgi-bin/carddisp.pl?gene=TPR</a>         |
| CALB1   | Calbindin 1                                          | Protein Coding | 49 | GC08M090058 | 3.095009327 | <a href="https://www.genecards.org/cgi-bin/carddisp.pl?gene=CALB1">https://www.genecards.org/cgi-bin/carddisp.pl?gene=CALB1</a>     |
| REL     | REL Proto-Oncogene, NF-KB Subunit                    | Protein Coding | 53 | GC02P060881 | 3.093712807 | <a href="https://www.genecards.org/cgi-bin/carddisp.pl?gene=REL">https://www.genecards.org/cgi-bin/carddisp.pl?gene=REL</a>         |
| DDX5    | DEAD-Box Helicase 5                                  | Protein Coding | 52 | GC17M064498 | 3.092330456 | <a href="https://www.genecards.org/cgi-bin/carddisp.pl?gene=DDX5">https://www.genecards.org/cgi-bin/carddisp.pl?gene=DDX5</a>       |
| PDCD1   | Programmed Cell Death 1                              | Protein Coding | 55 | GC02M241849 | 3.091902733 | <a href="https://www.genecards.org/cgi-bin/carddisp.pl?gene=PDCD1">https://www.genecards.org/cgi-bin/carddisp.pl?gene=PDCD1</a>     |

|          |                                              |                |    |             |             |                                                                                                                                       |
|----------|----------------------------------------------|----------------|----|-------------|-------------|---------------------------------------------------------------------------------------------------------------------------------------|
| MSR1     | Macrophage Scavenger Receptor 1              | Protein Coding | 52 | GC08M016107 | 3.090070248 | <a href="https://www.genecards.org/cgi-bin/carddisp.pl?gene=MSR1">https://www.genecards.org/cgi-bin/carddisp.pl?gene=MSR1</a>         |
| RAN      | RAN, Member RAS Oncogene Family              | Protein Coding | 50 | GC12P130871 | 3.086040258 | <a href="https://www.genecards.org/cgi-bin/carddisp.pl?gene=RAN">https://www.genecards.org/cgi-bin/carddisp.pl?gene=RAN</a>           |
| CDC25A   | Cell Division Cycle 25A                      | Protein Coding | 54 | GC03M048195 | 3.084305286 | <a href="https://www.genecards.org/cgi-bin/carddisp.pl?gene=CDC25A">https://www.genecards.org/cgi-bin/carddisp.pl?gene=CDC25A</a>     |
| ZDHHC5   | Zinc Finger DHHC-Type Palmitoyltransferase 5 | Protein Coding | 44 | GC11P057670 | 3.082505703 | <a href="https://www.genecards.org/cgi-bin/carddisp.pl?gene=ZDHHC5">https://www.genecards.org/cgi-bin/carddisp.pl?gene=ZDHHC5</a>     |
| HPR      | Haptoglobin-Related Protein                  | Protein Coding | 46 | GC16P072373 | 3.08214283  | <a href="https://www.genecards.org/cgi-bin/carddisp.pl?gene=HPR">https://www.genecards.org/cgi-bin/carddisp.pl?gene=HPR</a>           |
| ACOT7    | Acyl-CoA Thioesterase 7                      | Protein Coding | 47 | GC01M007591 | 3.081958532 | <a href="https://www.genecards.org/cgi-bin/carddisp.pl?gene=ACOT7">https://www.genecards.org/cgi-bin/carddisp.pl?gene=ACOT7</a>       |
| PAK1     | P21 (RAC1) Activated Kinase 1                | Protein Coding | 57 | GC11M100100 | 3.080955982 | <a href="https://www.genecards.org/cgi-bin/carddisp.pl?gene=PAK1">https://www.genecards.org/cgi-bin/carddisp.pl?gene=PAK1</a>         |
| HYAL2    | Hyaluronidase 2                              | Protein Coding | 51 | GC03M050317 | 3.079611301 | <a href="https://www.genecards.org/cgi-bin/carddisp.pl?gene=HYAL2">https://www.genecards.org/cgi-bin/carddisp.pl?gene=HYAL2</a>       |
| DUSP19   | Dual Specificity Phosphatase 19              | Protein Coding | 44 | GC02P183078 | 3.077805996 | <a href="https://www.genecards.org/cgi-bin/carddisp.pl?gene=DUSP19">https://www.genecards.org/cgi-bin/carddisp.pl?gene=DUSP19</a>     |
| MAPK7    | Mitogen-Activated Protein Kinase 7           | Protein Coding | 54 | GC17P061131 | 3.077512503 | <a href="https://www.genecards.org/cgi-bin/carddisp.pl?gene=MAPK7">https://www.genecards.org/cgi-bin/carddisp.pl?gene=MAPK7</a>       |
| BAD      | BCL2 Associated Agonist Of Cell Death        | Protein Coding | 51 | GC11M099650 | 3.075921774 | <a href="https://www.genecards.org/cgi-bin/carddisp.pl?gene=BAD">https://www.genecards.org/cgi-bin/carddisp.pl?gene=BAD</a>           |
| ADCY5    | Adenylate Cyclase 5                          | Protein Coding | 55 | GC03M123282 | 3.074261189 | <a href="https://www.genecards.org/cgi-bin/carddisp.pl?gene=ADCY5">https://www.genecards.org/cgi-bin/carddisp.pl?gene=ADCY5</a>       |
| ADAMTSL1 | ADAMTS Like 1                                | Protein Coding | 49 | GC09P017906 | 3.073168039 | <a href="https://www.genecards.org/cgi-bin/carddisp.pl?gene=ADAMTSL1">https://www.genecards.org/cgi-bin/carddisp.pl?gene=ADAMTSL1</a> |
| CCR5     | C-C Motif Chemokine Receptor 5               | Protein Coding | 53 | GC03P047615 | 3.073025703 | <a href="https://www.genecards.org/cgi-bin/carddisp.pl?gene=CCR5">https://www.genecards.org/cgi-bin/carddisp.pl?gene=CCR5</a>         |
| GZMB     | Granzyme B                                   | Protein Coding | 54 | GC14M024630 | 3.072257996 | <a href="https://www.genecards.org/cgi-bin/carddisp.pl?gene=GZMB">https://www.genecards.org/cgi-bin/carddisp.pl?gene=GZMB</a>         |

|        |                                           |                |    |             |             |                                                                                                                                   |
|--------|-------------------------------------------|----------------|----|-------------|-------------|-----------------------------------------------------------------------------------------------------------------------------------|
| HRH1   | Histamine Receptor H1                     | Protein Coding | 52 | GC03P013698 | 3.071516037 | <a href="https://www.genecards.org/cgi-bin/carddisp.pl?gene=HRH1">https://www.genecards.org/cgi-bin/carddisp.pl?gene=HRH1</a>     |
| CERS3  | Ceramide Synthase 3                       | Protein Coding | 47 | GC15M122864 | 3.067425251 | <a href="https://www.genecards.org/cgi-bin/carddisp.pl?gene=CERS3">https://www.genecards.org/cgi-bin/carddisp.pl?gene=CERS3</a>   |
| NEFH   | Neurofilament Heavy Chain                 | Protein Coding | 52 | GC22P029480 | 3.063281059 | <a href="https://www.genecards.org/cgi-bin/carddisp.pl?gene=NEFH">https://www.genecards.org/cgi-bin/carddisp.pl?gene=NEFH</a>     |
| RPS6   | Ribosomal Protein S6                      | Protein Coding | 50 | GC09M019375 | 3.061184645 | <a href="https://www.genecards.org/cgi-bin/carddisp.pl?gene=RPS6">https://www.genecards.org/cgi-bin/carddisp.pl?gene=RPS6</a>     |
| POU1F1 | POU Class 1 Homeobox 1                    | Protein Coding | 48 | GC03M087259 | 3.055360556 | <a href="https://www.genecards.org/cgi-bin/carddisp.pl?gene=POU1F1">https://www.genecards.org/cgi-bin/carddisp.pl?gene=POU1F1</a> |
| AANAT  | Aralkylamine N-Acetyltransferase          | Protein Coding | 46 | GC17P076453 | 3.053804159 | <a href="https://www.genecards.org/cgi-bin/carddisp.pl?gene=AANAT">https://www.genecards.org/cgi-bin/carddisp.pl?gene=AANAT</a>   |
| GNAQ   | G Protein Subunit Alpha Q                 | Protein Coding | 55 | GC09M077716 | 3.051543951 | <a href="https://www.genecards.org/cgi-bin/carddisp.pl?gene=GNAQ">https://www.genecards.org/cgi-bin/carddisp.pl?gene=GNAQ</a>     |
| LCLAT1 | Lysocardiolipin Acyltransferase 1         | Protein Coding | 43 | GC02P030447 | 3.03848815  | <a href="https://www.genecards.org/cgi-bin/carddisp.pl?gene=LCLAT1">https://www.genecards.org/cgi-bin/carddisp.pl?gene=LCLAT1</a> |
| IL2RG  | Interleukin 2 Receptor Subunit Gamma      | Protein Coding | 55 | GC0XM071108 | 3.037034273 | <a href="https://www.genecards.org/cgi-bin/carddisp.pl?gene=IL2RG">https://www.genecards.org/cgi-bin/carddisp.pl?gene=IL2RG</a>   |
| NOX1   | NADPH Oxidase 1                           | Protein Coding | 50 | GC0XM100843 | 3.033960581 | <a href="https://www.genecards.org/cgi-bin/carddisp.pl?gene=NOX1">https://www.genecards.org/cgi-bin/carddisp.pl?gene=NOX1</a>     |
| LPCAT3 | Lysophosphatidylcholine Acyltransferase 3 | Protein Coding | 44 | GC12M006976 | 3.032484293 | <a href="https://www.genecards.org/cgi-bin/carddisp.pl?gene=LPCAT3">https://www.genecards.org/cgi-bin/carddisp.pl?gene=LPCAT3</a> |
| DSPP   | Dentin Sialophosphoprotein                | Protein Coding | 45 | GC04P087608 | 3.03011179  | <a href="https://www.genecards.org/cgi-bin/carddisp.pl?gene=DSPP">https://www.genecards.org/cgi-bin/carddisp.pl?gene=DSPP</a>     |
| EDNRB  | Endothelin Receptor Type B                | Protein Coding | 56 | GC13M077895 | 3.028537989 | <a href="https://www.genecards.org/cgi-bin/carddisp.pl?gene=EDNRB">https://www.genecards.org/cgi-bin/carddisp.pl?gene=EDNRB</a>   |
| CCN1   | Cellular Communication Network Factor 1   | Protein Coding | 47 | GC01P085581 | 3.02657032  | <a href="https://www.genecards.org/cgi-bin/carddisp.pl?gene=CCN1">https://www.genecards.org/cgi-bin/carddisp.pl?gene=CCN1</a>     |
| UTS2   | Urotensin 2                               | Protein Coding | 46 | GC01M007843 | 3.025096655 | <a href="https://www.genecards.org/cgi-bin/carddisp.pl?gene=UTS2">https://www.genecards.org/cgi-bin/carddisp.pl?gene=UTS2</a>     |

|         |                                                                          |                |    |             |             |                                                                                                                                     |
|---------|--------------------------------------------------------------------------|----------------|----|-------------|-------------|-------------------------------------------------------------------------------------------------------------------------------------|
| CCND2   | Cyclin D2                                                                | Protein Coding | 55 | GC12P023493 | 3.024245024 | <a href="https://www.genecards.org/cgi-bin/carddisp.pl?gene=CCND2">https://www.genecards.org/cgi-bin/carddisp.pl?gene=CCND2</a>     |
| RAB5A   | RAB5A, Member RAS Oncogene Family                                        | Protein Coding | 51 | GC03P019948 | 3.02043581  | <a href="https://www.genecards.org/cgi-bin/carddisp.pl?gene=RAB5A">https://www.genecards.org/cgi-bin/carddisp.pl?gene=RAB5A</a>     |
| MKI67   | Marker Of Proliferation Ki-67                                            | Protein Coding | 51 | GC10M128096 | 3.018312931 | <a href="https://www.genecards.org/cgi-bin/carddisp.pl?gene=MKI67">https://www.genecards.org/cgi-bin/carddisp.pl?gene=MKI67</a>     |
| EIF2AK1 | Eukaryotic Translation Initiation Factor 2 Alpha Kinase 1                | Protein Coding | 51 | GC07M006022 | 3.017688274 | <a href="https://www.genecards.org/cgi-bin/carddisp.pl?gene=EIF2AK1">https://www.genecards.org/cgi-bin/carddisp.pl?gene=EIF2AK1</a> |
| MAP3K7  | Mitogen-Activated Protein Kinase Kinase Kinase 7                         | Protein Coding | 57 | GC06M090513 | 3.015327454 | <a href="https://www.genecards.org/cgi-bin/carddisp.pl?gene=MAP3K7">https://www.genecards.org/cgi-bin/carddisp.pl?gene=MAP3K7</a>   |
| CERS4   | Ceramide Synthase 4                                                      | Protein Coding | 48 | GC19P008206 | 3.009953976 | <a href="https://www.genecards.org/cgi-bin/carddisp.pl?gene=CERS4">https://www.genecards.org/cgi-bin/carddisp.pl?gene=CERS4</a>     |
| F2R     | Coagulation Factor II Thrombin Receptor                                  | Protein Coding | 53 | GC05P076716 | 3.008503437 | <a href="https://www.genecards.org/cgi-bin/carddisp.pl?gene=F2R">https://www.genecards.org/cgi-bin/carddisp.pl?gene=F2R</a>         |
| CR1     | Complement C3b/C4b Receptor 1 (Knops Blood Group)                        | Protein Coding | 51 | GC01P207496 | 3.006123543 | <a href="https://www.genecards.org/cgi-bin/carddisp.pl?gene=CR1">https://www.genecards.org/cgi-bin/carddisp.pl?gene=CR1</a>         |
| CCNA2   | Cyclin A2                                                                | Protein Coding | 52 | GC04M121816 | 3.00469923  | <a href="https://www.genecards.org/cgi-bin/carddisp.pl?gene=CCNA2">https://www.genecards.org/cgi-bin/carddisp.pl?gene=CCNA2</a>     |
| MSBP1   | Minisatellite Binding Protein 1                                          | Protein Coding | 6  | GC00U990213 | 3.003406048 | <a href="https://www.genecards.org/cgi-bin/carddisp.pl?gene=MSBP1">https://www.genecards.org/cgi-bin/carddisp.pl?gene=MSBP1</a>     |
| EIF4B   | Eukaryotic Translation Initiation Factor 4B                              | Protein Coding | 48 | GC12P053006 | 3.003115654 | <a href="https://www.genecards.org/cgi-bin/carddisp.pl?gene=EIF4B">https://www.genecards.org/cgi-bin/carddisp.pl?gene=EIF4B</a>     |
| IYD     | Iodotyrosine Deiodinase                                                  | Protein Coding | 47 | GC06P150368 | 3.001287222 | <a href="https://www.genecards.org/cgi-bin/carddisp.pl?gene=IYD">https://www.genecards.org/cgi-bin/carddisp.pl?gene=IYD</a>         |
| NSF     | N-Ethylmaleimide Sensitive Factor, Vesicle Fusing ATPase                 | Protein Coding | 51 | GC17P046590 | 2.995528221 | <a href="https://www.genecards.org/cgi-bin/carddisp.pl?gene=NSF">https://www.genecards.org/cgi-bin/carddisp.pl?gene=NSF</a>         |
| LPCAT2  | Lysophosphatidylcholine Acyltransferase 2                                | Protein Coding | 48 | GC16P055510 | 2.994910717 | <a href="https://www.genecards.org/cgi-bin/carddisp.pl?gene=LPCAT2">https://www.genecards.org/cgi-bin/carddisp.pl?gene=LPCAT2</a>   |
| MGAT5   | Alpha-1,6-Mannosylglycoprotein<br>6-Beta-N-Acetylglucosaminyltransferase | Protein Coding | 48 | GC02P134119 | 2.994092226 | <a href="https://www.genecards.org/cgi-bin/carddisp.pl?gene=MGAT5">https://www.genecards.org/cgi-bin/carddisp.pl?gene=MGAT5</a>     |

|         |                                               |                |    |             |             |                                                                                                                                     |
|---------|-----------------------------------------------|----------------|----|-------------|-------------|-------------------------------------------------------------------------------------------------------------------------------------|
| TGFB1   | Transforming Growth Factor Beta Induced       | Protein Coding | 53 | GC05P136027 | 2.993627071 | <a href="https://www.genecards.org/cgi-bin/carddisp.pl?gene=TGFB1">https://www.genecards.org/cgi-bin/carddisp.pl?gene=TGFB1</a>     |
| TGIF1   | TGFB Induced Factor Homeobox 1                | Protein Coding | 53 | GC18P003411 | 2.990906    | <a href="https://www.genecards.org/cgi-bin/carddisp.pl?gene=TGIF1">https://www.genecards.org/cgi-bin/carddisp.pl?gene=TGIF1</a>     |
| ARHGAP1 | Rho GTPase Activating Protein 1               | Protein Coding | 49 | GC11M099353 | 2.990369797 | <a href="https://www.genecards.org/cgi-bin/carddisp.pl?gene=ARHGAP1">https://www.genecards.org/cgi-bin/carddisp.pl?gene=ARHGAP1</a> |
| FHL2    | Four And A Half LIM Domains 2                 | Protein Coding | 53 | GC02M105357 | 2.988026142 | <a href="https://www.genecards.org/cgi-bin/carddisp.pl?gene=FHL2">https://www.genecards.org/cgi-bin/carddisp.pl?gene=FHL2</a>       |
| ELOVL3  | ELOVL Fatty Acid Elongase 3                   | Protein Coding | 41 | GC10P102226 | 2.985116005 | <a href="https://www.genecards.org/cgi-bin/carddisp.pl?gene=ELOVL3">https://www.genecards.org/cgi-bin/carddisp.pl?gene=ELOVL3</a>   |
| GRM5    | Glutamate Metabotropic Receptor 5             | Protein Coding | 53 | GC11M088504 | 2.984042168 | <a href="https://www.genecards.org/cgi-bin/carddisp.pl?gene=GRM5">https://www.genecards.org/cgi-bin/carddisp.pl?gene=GRM5</a>       |
| HDAC6   | Histone Deacetylase 6                         | Protein Coding | 61 | GC0XP048801 | 2.98350811  | <a href="https://www.genecards.org/cgi-bin/carddisp.pl?gene=HDAC6">https://www.genecards.org/cgi-bin/carddisp.pl?gene=HDAC6</a>     |
| AQP9    | Aquaporin 9                                   | Protein Coding | 49 | GC15P058138 | 2.982341766 | <a href="https://www.genecards.org/cgi-bin/carddisp.pl?gene=AQP9">https://www.genecards.org/cgi-bin/carddisp.pl?gene=AQP9</a>       |
| CD274   | CD274 Molecule                                | Protein Coding | 52 | GC09P005450 | 2.978649139 | <a href="https://www.genecards.org/cgi-bin/carddisp.pl?gene=CD274">https://www.genecards.org/cgi-bin/carddisp.pl?gene=CD274</a>     |
| LNPEP   | Leucyl And Cystinyl Aminopeptidase            | Protein Coding | 52 | GC05P096935 | 2.976631403 | <a href="https://www.genecards.org/cgi-bin/carddisp.pl?gene=LNPEP">https://www.genecards.org/cgi-bin/carddisp.pl?gene=LNPEP</a>     |
| L1CAM   | L1 Cell Adhesion Molecule                     | Protein Coding | 54 | GC0XM153864 | 2.975522995 | <a href="https://www.genecards.org/cgi-bin/carddisp.pl?gene=L1CAM">https://www.genecards.org/cgi-bin/carddisp.pl?gene=L1CAM</a>     |
| PDPK1   | 3-Phosphoinositide Dependent Protein Kinase 1 | Protein Coding | 55 | GC16P002537 | 2.972537518 | <a href="https://www.genecards.org/cgi-bin/carddisp.pl?gene=PDPK1">https://www.genecards.org/cgi-bin/carddisp.pl?gene=PDPK1</a>     |
| DES     | Desmin                                        | Protein Coding | 55 | GC02P219418 | 2.970502853 | <a href="https://www.genecards.org/cgi-bin/carddisp.pl?gene=DES">https://www.genecards.org/cgi-bin/carddisp.pl?gene=DES</a>         |
| PPBP    | Pro-Platelet Basic Protein                    | Protein Coding | 49 | GC04M073986 | 2.964915276 | <a href="https://www.genecards.org/cgi-bin/carddisp.pl?gene=PPBP">https://www.genecards.org/cgi-bin/carddisp.pl?gene=PPBP</a>       |
| BLM     | BLM RecQ Like Helicase                        | Protein Coding | 56 | GC15P090717 | 2.963648319 | <a href="https://www.genecards.org/cgi-bin/carddisp.pl?gene=BLM">https://www.genecards.org/cgi-bin/carddisp.pl?gene=BLM</a>         |

|        |                                                      |                |    |             |             |                                                                                                                                   |
|--------|------------------------------------------------------|----------------|----|-------------|-------------|-----------------------------------------------------------------------------------------------------------------------------------|
| S100B  | S100 Calcium Binding Protein B                       | Protein Coding | 51 | GC21M051379 | 2.961237431 | <a href="https://www.genecards.org/cgi-bin/carddisp.pl?gene=S100B">https://www.genecards.org/cgi-bin/carddisp.pl?gene=S100B</a>   |
| RAB6A  | RAB6A, Member RAS Oncogene Family                    | Protein Coding | 47 | GC11M099960 | 2.959060907 | <a href="https://www.genecards.org/cgi-bin/carddisp.pl?gene=RAB6A">https://www.genecards.org/cgi-bin/carddisp.pl?gene=RAB6A</a>   |
| HELLS  | Helicase, Lymphoid Specific                          | Protein Coding | 52 | GC10P094814 | 2.958610773 | <a href="https://www.genecards.org/cgi-bin/carddisp.pl?gene=HELLS">https://www.genecards.org/cgi-bin/carddisp.pl?gene=HELLS</a>   |
| PLAUR  | Plasminogen Activator, Urokinase Receptor            | Protein Coding | 52 | GC19M043646 | 2.953312874 | <a href="https://www.genecards.org/cgi-bin/carddisp.pl?gene=PLAUR">https://www.genecards.org/cgi-bin/carddisp.pl?gene=PLAUR</a>   |
| ATF2   | Activating Transcription Factor 2                    | Protein Coding | 54 | GC02M175072 | 2.950472832 | <a href="https://www.genecards.org/cgi-bin/carddisp.pl?gene=ATF2">https://www.genecards.org/cgi-bin/carddisp.pl?gene=ATF2</a>     |
| PTX3   | Pentraxin 3                                          | Protein Coding | 50 | GC03P157436 | 2.950279713 | <a href="https://www.genecards.org/cgi-bin/carddisp.pl?gene=PTX3">https://www.genecards.org/cgi-bin/carddisp.pl?gene=PTX3</a>     |
| CCND3  | Cyclin D3                                            | Protein Coding | 53 | GC06M041934 | 2.947537661 | <a href="https://www.genecards.org/cgi-bin/carddisp.pl?gene=CCND3">https://www.genecards.org/cgi-bin/carddisp.pl?gene=CCND3</a>   |
| ACSBG2 | Acyl-CoA Synthetase Bubblegum Family Member 2        | Protein Coding | 44 | GC19P006135 | 2.947389603 | <a href="https://www.genecards.org/cgi-bin/carddisp.pl?gene=ACSBG2">https://www.genecards.org/cgi-bin/carddisp.pl?gene=ACSBG2</a> |
| ITGA5  | Integrin Subunit Alpha 5                             | Protein Coding | 56 | GC12M055005 | 2.947187424 | <a href="https://www.genecards.org/cgi-bin/carddisp.pl?gene=ITGA5">https://www.genecards.org/cgi-bin/carddisp.pl?gene=ITGA5</a>   |
| MBOAT2 | Membrane Bound O-Acyltransferase Domain Containing 2 | Protein Coding | 42 | GC02M008853 | 2.943485022 | <a href="https://www.genecards.org/cgi-bin/carddisp.pl?gene=MBOAT2">https://www.genecards.org/cgi-bin/carddisp.pl?gene=MBOAT2</a> |
| PTPA   | Protein Phosphatase 2 Phosphatase Activator          | Protein Coding | 50 | GC09P129119 | 2.941158295 | <a href="https://www.genecards.org/cgi-bin/carddisp.pl?gene=PTPA">https://www.genecards.org/cgi-bin/carddisp.pl?gene=PTPA</a>     |
| THOP1  | Thimet Oligopeptidase 1                              | Protein Coding | 48 | GC19P002785 | 2.939968348 | <a href="https://www.genecards.org/cgi-bin/carddisp.pl?gene=THOP1">https://www.genecards.org/cgi-bin/carddisp.pl?gene=THOP1</a>   |
| ITGA2  | Integrin Subunit Alpha 2                             | Protein Coding | 53 | GC05P052989 | 2.937961817 | <a href="https://www.genecards.org/cgi-bin/carddisp.pl?gene=ITGA2">https://www.genecards.org/cgi-bin/carddisp.pl?gene=ITGA2</a>   |
| BCL6   | BCL6 Transcription Repressor                         | Protein Coding | 52 | GC03M187721 | 2.929877281 | <a href="https://www.genecards.org/cgi-bin/carddisp.pl?gene=BCL6">https://www.genecards.org/cgi-bin/carddisp.pl?gene=BCL6</a>     |
| NPY4R  | Neuropeptide Y Receptor Y4                           | Protein Coding | 46 | GC10M046461 | 2.929151297 | <a href="https://www.genecards.org/cgi-bin/carddisp.pl?gene=NPY4R">https://www.genecards.org/cgi-bin/carddisp.pl?gene=NPY4R</a>   |

|          |                                                    |                |    |             |             |                                                                                                                                       |
|----------|----------------------------------------------------|----------------|----|-------------|-------------|---------------------------------------------------------------------------------------------------------------------------------------|
| BAIAP2L1 | BAR/IMD Domain Containing Adaptor Protein 2 Like 1 | Protein Coding | 46 | GC07M098294 | 2.926037312 | <a href="https://www.genecards.org/cgi-bin/carddisp.pl?gene=BAIAP2L1">https://www.genecards.org/cgi-bin/carddisp.pl?gene=BAIAP2L1</a> |
| MAPK9    | Mitogen-Activated Protein Kinase 9                 | Protein Coding | 56 | GC05M180263 | 2.924700737 | <a href="https://www.genecards.org/cgi-bin/carddisp.pl?gene=MAPK9">https://www.genecards.org/cgi-bin/carddisp.pl?gene=MAPK9</a>       |
| PRKD1    | Protein Kinase D1                                  | Protein Coding | 56 | GC14M029576 | 2.923382521 | <a href="https://www.genecards.org/cgi-bin/carddisp.pl?gene=PRKD1">https://www.genecards.org/cgi-bin/carddisp.pl?gene=PRKD1</a>       |
| ADAM17   | ADAM Metallopeptidase Domain 17                    | Protein Coding | 58 | GC02M009488 | 2.92128253  | <a href="https://www.genecards.org/cgi-bin/carddisp.pl?gene=ADAM17">https://www.genecards.org/cgi-bin/carddisp.pl?gene=ADAM17</a>     |
| PRKCE    | Protein Kinase C Epsilon                           | Protein Coding | 55 | GC02P045651 | 2.918762207 | <a href="https://www.genecards.org/cgi-bin/carddisp.pl?gene=PRKCE">https://www.genecards.org/cgi-bin/carddisp.pl?gene=PRKCE</a>       |
| CBX5     | Chromobox 5                                        | Protein Coding | 50 | GC12M054230 | 2.918049335 | <a href="https://www.genecards.org/cgi-bin/carddisp.pl?gene=CBX5">https://www.genecards.org/cgi-bin/carddisp.pl?gene=CBX5</a>         |
| CRYAB    | Crystallin Alpha B                                 | Protein Coding | 53 | GC11M111908 | 2.917105913 | <a href="https://www.genecards.org/cgi-bin/carddisp.pl?gene=CRYAB">https://www.genecards.org/cgi-bin/carddisp.pl?gene=CRYAB</a>       |
| WARS2    | Tryptophanyl TRNA Synthetase 2, Mitochondrial      | Protein Coding | 51 | GC01M119031 | 2.916296005 | <a href="https://www.genecards.org/cgi-bin/carddisp.pl?gene=WARS2">https://www.genecards.org/cgi-bin/carddisp.pl?gene=WARS2</a>       |
| SLC22A7  | Solute Carrier Family 22 Member 7                  | Protein Coding | 48 | GC06P092349 | 2.914253712 | <a href="https://www.genecards.org/cgi-bin/carddisp.pl?gene=SLC22A7">https://www.genecards.org/cgi-bin/carddisp.pl?gene=SLC22A7</a>   |
| ADORA1   | Adenosine A1 Receptor                              | Protein Coding | 53 | GC01P203090 | 2.91362977  | <a href="https://www.genecards.org/cgi-bin/carddisp.pl?gene=ADORA1">https://www.genecards.org/cgi-bin/carddisp.pl?gene=ADORA1</a>     |
| VTN      | Vitronectin                                        | Protein Coding | 51 | GC17M051189 | 2.913039684 | <a href="https://www.genecards.org/cgi-bin/carddisp.pl?gene=VTN">https://www.genecards.org/cgi-bin/carddisp.pl?gene=VTN</a>           |
| PTPN3    | Protein Tyrosine Phosphatase Non-Receptor Type 3   | Protein Coding | 51 | GC09M109375 | 2.905050516 | <a href="https://www.genecards.org/cgi-bin/carddisp.pl?gene=PTPN3">https://www.genecards.org/cgi-bin/carddisp.pl?gene=PTPN3</a>       |
| SULT1A4  | Sulfotransferase Family 1A Member 4                | Protein Coding | 37 | GC16P042717 | 2.904377937 | <a href="https://www.genecards.org/cgi-bin/carddisp.pl?gene=SULT1A4">https://www.genecards.org/cgi-bin/carddisp.pl?gene=SULT1A4</a>   |
| TIMP3    | TIMP Metallopeptidase Inhibitor 3                  | Protein Coding | 50 | GC22P044970 | 2.901615143 | <a href="https://www.genecards.org/cgi-bin/carddisp.pl?gene=TIMP3">https://www.genecards.org/cgi-bin/carddisp.pl?gene=TIMP3</a>       |
| SP3      | Sp3 Transcription Factor                           | Protein Coding | 50 | GC02M173882 | 2.90152359  | <a href="https://www.genecards.org/cgi-bin/carddisp.pl?gene=SP3">https://www.genecards.org/cgi-bin/carddisp.pl?gene=SP3</a>           |

|         |                                                |                |    |             |             |                                                                                                                                     |
|---------|------------------------------------------------|----------------|----|-------------|-------------|-------------------------------------------------------------------------------------------------------------------------------------|
| PLK1    | Polo Like Kinase 1                             | Protein Coding | 58 | GC16P024566 | 2.901216269 | <a href="https://www.genecards.org/cgi-bin/carddisp.pl?gene=PLK1">https://www.genecards.org/cgi-bin/carddisp.pl?gene=PLK1</a>       |
| CSNK1A1 | Casein Kinase 1 Alpha 1                        | Protein Coding | 55 | GC05M149492 | 2.89967227  | <a href="https://www.genecards.org/cgi-bin/carddisp.pl?gene=CSNK1A1">https://www.genecards.org/cgi-bin/carddisp.pl?gene=CSNK1A1</a> |
| GRB14   | Growth Factor Receptor Bound Protein 14        | Protein Coding | 50 | GC02M164492 | 2.891060591 | <a href="https://www.genecards.org/cgi-bin/carddisp.pl?gene=GRB14">https://www.genecards.org/cgi-bin/carddisp.pl?gene=GRB14</a>     |
| CXCR2   | C-X-C Motif Chemokine Receptor 2               | Protein Coding | 57 | GC02P218125 | 2.887881041 | <a href="https://www.genecards.org/cgi-bin/carddisp.pl?gene=CXCR2">https://www.genecards.org/cgi-bin/carddisp.pl?gene=CXCR2</a>     |
| ITK     | IL2 Inducible T Cell Kinase                    | Protein Coding | 59 | GC05P157158 | 2.886702299 | <a href="https://www.genecards.org/cgi-bin/carddisp.pl?gene=ITK">https://www.genecards.org/cgi-bin/carddisp.pl?gene=ITK</a>         |
| GNAO1   | G Protein Subunit Alpha O1                     | Protein Coding | 52 | GC16P056231 | 2.884417772 | <a href="https://www.genecards.org/cgi-bin/carddisp.pl?gene=GNAO1">https://www.genecards.org/cgi-bin/carddisp.pl?gene=GNAO1</a>     |
| AVPR2   | Arginine Vasopressin Receptor 2                | Protein Coding | 53 | GC0XP153902 | 2.882421732 | <a href="https://www.genecards.org/cgi-bin/carddisp.pl?gene=AVPR2">https://www.genecards.org/cgi-bin/carddisp.pl?gene=AVPR2</a>     |
| SLC12A2 | Solute Carrier Family 12 Member 2              | Protein Coding | 56 | GC05P128083 | 2.881573439 | <a href="https://www.genecards.org/cgi-bin/carddisp.pl?gene=SLC12A2">https://www.genecards.org/cgi-bin/carddisp.pl?gene=SLC12A2</a> |
| CXCR1   | C-X-C Motif Chemokine Receptor 1               | Protein Coding | 50 | GC02M218162 | 2.877828598 | <a href="https://www.genecards.org/cgi-bin/carddisp.pl?gene=CXCR1">https://www.genecards.org/cgi-bin/carddisp.pl?gene=CXCR1</a>     |
| TRAF3   | TNF Receptor Associated Factor 3               | Protein Coding | 53 | GC14P110622 | 2.876880646 | <a href="https://www.genecards.org/cgi-bin/carddisp.pl?gene=TRAF3">https://www.genecards.org/cgi-bin/carddisp.pl?gene=TRAF3</a>     |
| BIRC3   | Baculoviral IAP Repeat Containing 3            | Protein Coding | 53 | GC11P102317 | 2.874317646 | <a href="https://www.genecards.org/cgi-bin/carddisp.pl?gene=BIRC3">https://www.genecards.org/cgi-bin/carddisp.pl?gene=BIRC3</a>     |
| EPHA4   | EPH Receptor A4                                | Protein Coding | 57 | GC02M221418 | 2.871276379 | <a href="https://www.genecards.org/cgi-bin/carddisp.pl?gene=EPHA4">https://www.genecards.org/cgi-bin/carddisp.pl?gene=EPHA4</a>     |
| MYLK    | Myosin Light Chain Kinase                      | Protein Coding | 57 | GC03M123610 | 2.868624449 | <a href="https://www.genecards.org/cgi-bin/carddisp.pl?gene=MYLK">https://www.genecards.org/cgi-bin/carddisp.pl?gene=MYLK</a>       |
| AGPAT5  | 1-Acylglycerol-3-Phosphate O-Acyltransferase 5 | Protein Coding | 48 | GC08P006708 | 2.867540121 | <a href="https://www.genecards.org/cgi-bin/carddisp.pl?gene=AGPAT5">https://www.genecards.org/cgi-bin/carddisp.pl?gene=AGPAT5</a>   |
| CDO1    | Cysteine Dioxygenase Type 1                    | Protein Coding | 47 | GC05M115804 | 2.867174625 | <a href="https://www.genecards.org/cgi-bin/carddisp.pl?gene=CDO1">https://www.genecards.org/cgi-bin/carddisp.pl?gene=CDO1</a>       |

|        |                                                |                |    |             |             |                                                                                                                                   |
|--------|------------------------------------------------|----------------|----|-------------|-------------|-----------------------------------------------------------------------------------------------------------------------------------|
| FURIN  | Furin, Paired Basic Amino Acid Cleaving Enzyme | Protein Coding | 54 | GC15P090868 | 2.866317272 | <a href="https://www.genecards.org/cgi-bin/carddisp.pl?gene=FURIN">https://www.genecards.org/cgi-bin/carddisp.pl?gene=FURIN</a>   |
| INHA   | Inhibin Subunit Alpha                          | Protein Coding | 49 | GC02P219569 | 2.866305113 | <a href="https://www.genecards.org/cgi-bin/carddisp.pl?gene=INHA">https://www.genecards.org/cgi-bin/carddisp.pl?gene=INHA</a>     |
| CFL1   | Cofilin 1                                      | Protein Coding | 52 | GC11M065823 | 2.865230083 | <a href="https://www.genecards.org/cgi-bin/carddisp.pl?gene=CFL1">https://www.genecards.org/cgi-bin/carddisp.pl?gene=CFL1</a>     |
| MCL1   | MCL1 Apoptosis Regulator, BCL2 Family Member   | Protein Coding | 55 | GC01M152731 | 2.86384058  | <a href="https://www.genecards.org/cgi-bin/carddisp.pl?gene=MCL1">https://www.genecards.org/cgi-bin/carddisp.pl?gene=MCL1</a>     |
| GLYAT  | Glycine-N-Acyltransferase                      | Protein Coding | 46 | GC11M099446 | 2.863129139 | <a href="https://www.genecards.org/cgi-bin/carddisp.pl?gene=GLYAT">https://www.genecards.org/cgi-bin/carddisp.pl?gene=GLYAT</a>   |
| HBG1   | Hemoglobin Subunit Gamma 1                     | Protein Coding | 47 | GC11M006834 | 2.862811327 | <a href="https://www.genecards.org/cgi-bin/carddisp.pl?gene=HBG1">https://www.genecards.org/cgi-bin/carddisp.pl?gene=HBG1</a>     |
| A2M    | Alpha-2-Macroglobulin                          | Protein Coding | 52 | GC12M009067 | 2.858912945 | <a href="https://www.genecards.org/cgi-bin/carddisp.pl?gene=A2M">https://www.genecards.org/cgi-bin/carddisp.pl?gene=A2M</a>       |
| PTGER4 | Prostaglandin E Receptor 4                     | Protein Coding | 52 | GC05P040679 | 2.858474731 | <a href="https://www.genecards.org/cgi-bin/carddisp.pl?gene=PTGER4">https://www.genecards.org/cgi-bin/carddisp.pl?gene=PTGER4</a> |
| PCNA   | Proliferating Cell Nuclear Antigen             | Protein Coding | 57 | GC20M005114 | 2.857391119 | <a href="https://www.genecards.org/cgi-bin/carddisp.pl?gene=PCNA">https://www.genecards.org/cgi-bin/carddisp.pl?gene=PCNA</a>     |
| ITGAL  | Integrin Subunit Alpha L                       | Protein Coding | 53 | GC16P030472 | 2.857074738 | <a href="https://www.genecards.org/cgi-bin/carddisp.pl?gene=ITGAL">https://www.genecards.org/cgi-bin/carddisp.pl?gene=ITGAL</a>   |
| FCGR3A | Fc Gamma Receptor IIIa                         | Protein Coding | 53 | GC01M161541 | 2.850360155 | <a href="https://www.genecards.org/cgi-bin/carddisp.pl?gene=FCGR3A">https://www.genecards.org/cgi-bin/carddisp.pl?gene=FCGR3A</a> |
| IGFBP6 | Insulin Like Growth Factor Binding Protein 6   | Protein Coding | 50 | GC12P053097 | 2.844712496 | <a href="https://www.genecards.org/cgi-bin/carddisp.pl?gene=IGFBP6">https://www.genecards.org/cgi-bin/carddisp.pl?gene=IGFBP6</a> |
| TXN2   | Thioredoxin 2                                  | Protein Coding | 50 | GC22M036467 | 2.843144894 | <a href="https://www.genecards.org/cgi-bin/carddisp.pl?gene=TXN2">https://www.genecards.org/cgi-bin/carddisp.pl?gene=TXN2</a>     |
| CBX1   | Chromobox 1                                    | Protein Coding | 48 | GC17M048070 | 2.839906454 | <a href="https://www.genecards.org/cgi-bin/carddisp.pl?gene=CBX1">https://www.genecards.org/cgi-bin/carddisp.pl?gene=CBX1</a>     |
| PIAS4  | Protein Inhibitor Of Activated STAT 4          | Protein Coding | 48 | GC19P004007 | 2.83911252  | <a href="https://www.genecards.org/cgi-bin/carddisp.pl?gene=PIAS4">https://www.genecards.org/cgi-bin/carddisp.pl?gene=PIAS4</a>   |

|           |                                                          |                |    |             |             |                                                                                                                                         |
|-----------|----------------------------------------------------------|----------------|----|-------------|-------------|-----------------------------------------------------------------------------------------------------------------------------------------|
| MMP13     | Matrix Metallopeptidase 13                               | Protein Coding | 57 | GC11M102942 | 2.838996172 | <a href="https://www.genecards.org/cgi-bin/carddisp.pl?gene=MMP13">https://www.genecards.org/cgi-bin/carddisp.pl?gene=MMP13</a>         |
| MYCN      | MYCN Proto-Oncogene, BHLH Transcription Factor           | Protein Coding | 53 | GC02P015954 | 2.838101864 | <a href="https://www.genecards.org/cgi-bin/carddisp.pl?gene=MYCN">https://www.genecards.org/cgi-bin/carddisp.pl?gene=MYCN</a>           |
| NPY1R     | Neuropeptide Y Receptor Y1                               | Protein Coding | 53 | GC04M163323 | 2.837838888 | <a href="https://www.genecards.org/cgi-bin/carddisp.pl?gene=NPY1R">https://www.genecards.org/cgi-bin/carddisp.pl?gene=NPY1R</a>         |
| TNFRSF10A | TNF Receptor Superfamily Member 10a                      | Protein Coding | 52 | GC08M023190 | 2.837100029 | <a href="https://www.genecards.org/cgi-bin/carddisp.pl?gene=TNFRSF10A">https://www.genecards.org/cgi-bin/carddisp.pl?gene=TNFRSF10A</a> |
| KRIT1     | KRIT1 Ankyrin Repeat Containing                          | Protein Coding | 48 | GC07M092198 | 2.832033157 | <a href="https://www.genecards.org/cgi-bin/carddisp.pl?gene=KRIT1">https://www.genecards.org/cgi-bin/carddisp.pl?gene=KRIT1</a>         |
| SULT1C4   | Sulfotransferase Family 1C Member 4                      | Protein Coding | 43 | GC02P108377 | 2.830641747 | <a href="https://www.genecards.org/cgi-bin/carddisp.pl?gene=SULT1C4">https://www.genecards.org/cgi-bin/carddisp.pl?gene=SULT1C4</a>     |
| MEFV      | MEFV Innate Immunity Regulator, Pyrin                    | Protein Coding | 51 | GC16M008228 | 2.823741913 | <a href="https://www.genecards.org/cgi-bin/carddisp.pl?gene=MEFV">https://www.genecards.org/cgi-bin/carddisp.pl?gene=MEFV</a>           |
| PREP      | Prolyl Endopeptidase                                     | Protein Coding | 48 | GC06M105277 | 2.822573662 | <a href="https://www.genecards.org/cgi-bin/carddisp.pl?gene=PREP">https://www.genecards.org/cgi-bin/carddisp.pl?gene=PREP</a>           |
| NF2       | NF2, Moesin-Ezrin-Radixin Like (MERLIN) Tumor Suppressor | Protein Coding | 55 | GC22P029603 | 2.821547747 | <a href="https://www.genecards.org/cgi-bin/carddisp.pl?gene=NF2">https://www.genecards.org/cgi-bin/carddisp.pl?gene=NF2</a>             |
| S100A8    | S100 Calcium Binding Protein A8                          | Protein Coding | 48 | GC01M153391 | 2.820464373 | <a href="https://www.genecards.org/cgi-bin/carddisp.pl?gene=S100A8">https://www.genecards.org/cgi-bin/carddisp.pl?gene=S100A8</a>       |
| ATR       | ATR Serine/Threonine Kinase                              | Protein Coding | 59 | GC03M142449 | 2.820094347 | <a href="https://www.genecards.org/cgi-bin/carddisp.pl?gene=ATR">https://www.genecards.org/cgi-bin/carddisp.pl?gene=ATR</a>             |
| CCL4      | C-C Motif Chemokine Ligand 4                             | Protein Coding | 47 | GC17P036103 | 2.819907188 | <a href="https://www.genecards.org/cgi-bin/carddisp.pl?gene=CCL4">https://www.genecards.org/cgi-bin/carddisp.pl?gene=CCL4</a>           |
| SERPINB1  | Serpin Family B Member 1                                 | Protein Coding | 47 | GC06M002852 | 2.815357924 | <a href="https://www.genecards.org/cgi-bin/carddisp.pl?gene=SERPINB1">https://www.genecards.org/cgi-bin/carddisp.pl?gene=SERPINB1</a>   |
| LIMK1     | LIM Domain Kinase 1                                      | Protein Coding | 56 | GC07P074082 | 2.813730001 | <a href="https://www.genecards.org/cgi-bin/carddisp.pl?gene=LIMK1">https://www.genecards.org/cgi-bin/carddisp.pl?gene=LIMK1</a>         |
| PSMC4     | Proteasome 26S Subunit, ATPase 4                         | Protein Coding | 47 | GC19P072849 | 2.812140942 | <a href="https://www.genecards.org/cgi-bin/carddisp.pl?gene=PSMC4">https://www.genecards.org/cgi-bin/carddisp.pl?gene=PSMC4</a>         |

|        |                                                                            |                |    |             |             |                                                                                                                                   |
|--------|----------------------------------------------------------------------------|----------------|----|-------------|-------------|-----------------------------------------------------------------------------------------------------------------------------------|
| YWHAH  | Tyrosine 3-Monooxygenase/Tryptophan 5-Monooxygenase Activation Protein Eta | Protein Coding | 53 | GC22P031944 | 2.810483932 | <a href="https://www.genecards.org/cgi-bin/carddisp.pl?gene=YWHAH">https://www.genecards.org/cgi-bin/carddisp.pl?gene=YWHAH</a>   |
| PECAM1 | Platelet And Endothelial Cell Adhesion Molecule 1                          | Protein Coding | 47 | GC17M064319 | 2.80936718  | <a href="https://www.genecards.org/cgi-bin/carddisp.pl?gene=PECAM1">https://www.genecards.org/cgi-bin/carddisp.pl?gene=PECAM1</a> |
| FADD   | Fas Associated Via Death Domain                                            | Protein Coding | 52 | GC11P070203 | 2.808387756 | <a href="https://www.genecards.org/cgi-bin/carddisp.pl?gene=FADD">https://www.genecards.org/cgi-bin/carddisp.pl?gene=FADD</a>     |
| AKAP13 | A-Kinase Anchoring Protein 13                                              | Protein Coding | 49 | GC15P123897 | 2.804094791 | <a href="https://www.genecards.org/cgi-bin/carddisp.pl?gene=AKAP13">https://www.genecards.org/cgi-bin/carddisp.pl?gene=AKAP13</a> |
| GRM1   | Glutamate Metabotropic Receptor 1                                          | Protein Coding | 57 | GC06P145973 | 2.799233913 | <a href="https://www.genecards.org/cgi-bin/carddisp.pl?gene=GRM1">https://www.genecards.org/cgi-bin/carddisp.pl?gene=GRM1</a>     |
| FEN1   | Flap Structure-Specific Endonuclease 1                                     | Protein Coding | 53 | GC11P061793 | 2.798650742 | <a href="https://www.genecards.org/cgi-bin/carddisp.pl?gene=FEN1">https://www.genecards.org/cgi-bin/carddisp.pl?gene=FEN1</a>     |
| SLC1A7 | Solute Carrier Family 1 Member 7                                           | Protein Coding | 50 | GC01M053087 | 2.797800779 | <a href="https://www.genecards.org/cgi-bin/carddisp.pl?gene=SLC1A7">https://www.genecards.org/cgi-bin/carddisp.pl?gene=SLC1A7</a> |
| MTMR2  | Myotubularin Related Protein 2                                             | Protein Coding | 52 | GC11M100315 | 2.797639847 | <a href="https://www.genecards.org/cgi-bin/carddisp.pl?gene=MTMR2">https://www.genecards.org/cgi-bin/carddisp.pl?gene=MTMR2</a>   |
| ERBB3  | Erb-B2 Receptor Tyrosine Kinase 3                                          | Protein Coding | 60 | GC12P057479 | 2.795985222 | <a href="https://www.genecards.org/cgi-bin/carddisp.pl?gene=ERBB3">https://www.genecards.org/cgi-bin/carddisp.pl?gene=ERBB3</a>   |
| CXCL12 | C-X-C Motif Chemokine Ligand 12                                            | Protein Coding | 51 | GC10M044370 | 2.794643164 | <a href="https://www.genecards.org/cgi-bin/carddisp.pl?gene=CXCL12">https://www.genecards.org/cgi-bin/carddisp.pl?gene=CXCL12</a> |
| IBSP   | Integrin Binding Sialoprotein                                              | Protein Coding | 45 | GC04P087799 | 2.793280363 | <a href="https://www.genecards.org/cgi-bin/carddisp.pl?gene=IBSP">https://www.genecards.org/cgi-bin/carddisp.pl?gene=IBSP</a>     |
| CIITA  | Class II Major Histocompatibility Complex Transactivator                   | Protein Coding | 51 | GC16P013730 | 2.792242765 | <a href="https://www.genecards.org/cgi-bin/carddisp.pl?gene=CIITA">https://www.genecards.org/cgi-bin/carddisp.pl?gene=CIITA</a>   |
| ACP2   | Acid Phosphatase 2, Lysosomal                                              | Protein Coding | 49 | GC11M099364 | 2.791862249 | <a href="https://www.genecards.org/cgi-bin/carddisp.pl?gene=ACP2">https://www.genecards.org/cgi-bin/carddisp.pl?gene=ACP2</a>     |
| CKS1B  | CDC28 Protein Kinase Regulatory Subunit 1B                                 | Protein Coding | 48 | GC01P154974 | 2.788207769 | <a href="https://www.genecards.org/cgi-bin/carddisp.pl?gene=CKS1B">https://www.genecards.org/cgi-bin/carddisp.pl?gene=CKS1B</a>   |
| P2RY12 | Purinergic Receptor P2Y12                                                  | Protein Coding | 55 | GC03M151336 | 2.787358761 | <a href="https://www.genecards.org/cgi-bin/carddisp.pl?gene=P2RY12">https://www.genecards.org/cgi-bin/carddisp.pl?gene=P2RY12</a> |

|         |                                                     |                |    |             |             |                                                                                                                                     |
|---------|-----------------------------------------------------|----------------|----|-------------|-------------|-------------------------------------------------------------------------------------------------------------------------------------|
| RPS6KA1 | Ribosomal Protein S6 Kinase A1                      | Protein Coding | 57 | GC01P026540 | 2.782677889 | <a href="https://www.genecards.org/cgi-bin/carddisp.pl?gene=RPS6KA1">https://www.genecards.org/cgi-bin/carddisp.pl?gene=RPS6KA1</a> |
| SULT1C3 | Sulfotransferase Family 1C Member 3                 | Protein Coding | 41 | GC02P108230 | 2.780189991 | <a href="https://www.genecards.org/cgi-bin/carddisp.pl?gene=SULT1C3">https://www.genecards.org/cgi-bin/carddisp.pl?gene=SULT1C3</a> |
| MICB    | MHC Class I Polypeptide-Related Sequence B          | Protein Coding | 47 | GC06P092149 | 2.778273106 | <a href="https://www.genecards.org/cgi-bin/carddisp.pl?gene=MICB">https://www.genecards.org/cgi-bin/carddisp.pl?gene=MICB</a>       |
| ST3GAL5 | ST3 Beta-Galactoside Alpha-2,3-Sialyltransferase 5  | Protein Coding | 53 | GC02M085839 | 2.777647018 | <a href="https://www.genecards.org/cgi-bin/carddisp.pl?gene=ST3GAL5">https://www.genecards.org/cgi-bin/carddisp.pl?gene=ST3GAL5</a> |
| PIEZO1  | Piezo Type Mechanosensitive Ion Channel Component 1 | Protein Coding | 47 | GC16M088715 | 2.772140026 | <a href="https://www.genecards.org/cgi-bin/carddisp.pl?gene=PIEZO1">https://www.genecards.org/cgi-bin/carddisp.pl?gene=PIEZO1</a>   |
| MCAT    | Malonyl-CoA-Acyl Carrier Protein Transacylase       | Protein Coding | 48 | GC22M043132 | 2.77162981  | <a href="https://www.genecards.org/cgi-bin/carddisp.pl?gene=MCAT">https://www.genecards.org/cgi-bin/carddisp.pl?gene=MCAT</a>       |
| HIBADH  | 3-Hydroxyisobutyrate Dehydrogenase                  | Protein Coding | 47 | GC07M027525 | 2.771614313 | <a href="https://www.genecards.org/cgi-bin/carddisp.pl?gene=HIBADH">https://www.genecards.org/cgi-bin/carddisp.pl?gene=HIBADH</a>   |
| SRSF2   | Serine And Arginine Rich Splicing Factor 2          | Protein Coding | 47 | GC17M076734 | 2.771296501 | <a href="https://www.genecards.org/cgi-bin/carddisp.pl?gene=SRSF2">https://www.genecards.org/cgi-bin/carddisp.pl?gene=SRSF2</a>     |
| ETS1    | ETS Proto-Oncogene 1, Transcription Factor          | Protein Coding | 53 | GC11M128458 | 2.770843744 | <a href="https://www.genecards.org/cgi-bin/carddisp.pl?gene=ETS1">https://www.genecards.org/cgi-bin/carddisp.pl?gene=ETS1</a>       |
| PF4     | Platelet Factor 4                                   | Protein Coding | 47 | GC04M073980 | 2.770424366 | <a href="https://www.genecards.org/cgi-bin/carddisp.pl?gene=PF4">https://www.genecards.org/cgi-bin/carddisp.pl?gene=PF4</a>         |
| ALPI    | Alkaline Phosphatase, Intestinal                    | Protein Coding | 53 | GC02P232456 | 2.770240307 | <a href="https://www.genecards.org/cgi-bin/carddisp.pl?gene=ALPI">https://www.genecards.org/cgi-bin/carddisp.pl?gene=ALPI</a>       |
| PLCB3   | Phospholipase C Beta 3                              | Protein Coding | 56 | GC11P064251 | 2.770110607 | <a href="https://www.genecards.org/cgi-bin/carddisp.pl?gene=PLCB3">https://www.genecards.org/cgi-bin/carddisp.pl?gene=PLCB3</a>     |
| YBX1    | Y-Box Binding Protein 1                             | Protein Coding | 46 | GC01P042682 | 2.769355774 | <a href="https://www.genecards.org/cgi-bin/carddisp.pl?gene=YBX1">https://www.genecards.org/cgi-bin/carddisp.pl?gene=YBX1</a>       |
| PANK3   | Pantothenate Kinase 3                               | Protein Coding | 44 | GC05M168549 | 2.766651154 | <a href="https://www.genecards.org/cgi-bin/carddisp.pl?gene=PANK3">https://www.genecards.org/cgi-bin/carddisp.pl?gene=PANK3</a>     |
| RPL13A  | Ribosomal Protein L13a                              | Protein Coding | 48 | GC19P049487 | 2.766079187 | <a href="https://www.genecards.org/cgi-bin/carddisp.pl?gene=RPL13A">https://www.genecards.org/cgi-bin/carddisp.pl?gene=RPL13A</a>   |

|        |                                                            |                |    |             |             |                                                                                                                                   |
|--------|------------------------------------------------------------|----------------|----|-------------|-------------|-----------------------------------------------------------------------------------------------------------------------------------|
| SUCLG2 | Succinate-CoA Ligase GDP-Forming Subunit Beta              | Protein Coding | 49 | GC03M067358 | 2.763974905 | <a href="https://www.genecards.org/cgi-bin/carddisp.pl?gene=SUCLG2">https://www.genecards.org/cgi-bin/carddisp.pl?gene=SUCLG2</a> |
| FST    | Follistatin                                                | Protein Coding | 55 | GC05P053480 | 2.76219511  | <a href="https://www.genecards.org/cgi-bin/carddisp.pl?gene=FST">https://www.genecards.org/cgi-bin/carddisp.pl?gene=FST</a>       |
| IKBKE  | Inhibitor Of Nuclear Factor Kappa B Kinase Subunit Epsilon | Protein Coding | 52 | GC01P206470 | 2.76121664  | <a href="https://www.genecards.org/cgi-bin/carddisp.pl?gene=IKBKE">https://www.genecards.org/cgi-bin/carddisp.pl?gene=IKBKE</a>   |
| AWAT1  | Acyl-CoA Wax Alcohol Acyltransferase 1                     | Protein Coding | 32 | GC0XP070234 | 2.760582924 | <a href="https://www.genecards.org/cgi-bin/carddisp.pl?gene=AWAT1">https://www.genecards.org/cgi-bin/carddisp.pl?gene=AWAT1</a>   |
| IL2RB  | Interleukin 2 Receptor Subunit Beta                        | Protein Coding | 56 | GC22M061459 | 2.75886631  | <a href="https://www.genecards.org/cgi-bin/carddisp.pl?gene=IL2RB">https://www.genecards.org/cgi-bin/carddisp.pl?gene=IL2RB</a>   |
| IRF3   | Interferon Regulatory Factor 3                             | Protein Coding | 51 | GC19M049659 | 2.755576134 | <a href="https://www.genecards.org/cgi-bin/carddisp.pl?gene=IRF3">https://www.genecards.org/cgi-bin/carddisp.pl?gene=IRF3</a>     |
| EPHA2  | EPH Receptor A2                                            | Protein Coding | 60 | GC01M016124 | 2.755475283 | <a href="https://www.genecards.org/cgi-bin/carddisp.pl?gene=EPHA2">https://www.genecards.org/cgi-bin/carddisp.pl?gene=EPHA2</a>   |
| ADRA2B | Adrenoceptor Alpha 2B                                      | Protein Coding | 51 | GC02M096112 | 2.752860546 | <a href="https://www.genecards.org/cgi-bin/carddisp.pl?gene=ADRA2B">https://www.genecards.org/cgi-bin/carddisp.pl?gene=ADRA2B</a> |
| PRLHR  | Prolactin Releasing Hormone Receptor                       | Protein Coding | 46 | GC10M118590 | 2.752020121 | <a href="https://www.genecards.org/cgi-bin/carddisp.pl?gene=PRLHR">https://www.genecards.org/cgi-bin/carddisp.pl?gene=PRLHR</a>   |
| FOSL1  | FOS Like 1, AP-1 Transcription Factor Subunit              | Protein Coding | 51 | GC11M099737 | 2.751973152 | <a href="https://www.genecards.org/cgi-bin/carddisp.pl?gene=FOSL1">https://www.genecards.org/cgi-bin/carddisp.pl?gene=FOSL1</a>   |
| SENP2  | SUMO Specific Peptidase 2                                  | Protein Coding | 47 | GC03P185582 | 2.750661612 | <a href="https://www.genecards.org/cgi-bin/carddisp.pl?gene=SENP2">https://www.genecards.org/cgi-bin/carddisp.pl?gene=SENP2</a>   |
| TPM3   | Tropomyosin 3                                              | Protein Coding | 53 | GC01M154127 | 2.744642019 | <a href="https://www.genecards.org/cgi-bin/carddisp.pl?gene=TPM3">https://www.genecards.org/cgi-bin/carddisp.pl?gene=TPM3</a>     |
| LCK    | LCK Proto-Oncogene, Src Family Tyrosine Kinase             | Protein Coding | 59 | GC01P032251 | 2.742602825 | <a href="https://www.genecards.org/cgi-bin/carddisp.pl?gene=LCK">https://www.genecards.org/cgi-bin/carddisp.pl?gene=LCK</a>       |
| FAR2   | Fatty Acyl-CoA Reductase 2                                 | Protein Coding | 45 | GC12P029145 | 2.741351843 | <a href="https://www.genecards.org/cgi-bin/carddisp.pl?gene=FAR2">https://www.genecards.org/cgi-bin/carddisp.pl?gene=FAR2</a>     |
| PTAFR  | Platelet Activating Factor Receptor                        | Protein Coding | 48 | GC01M028147 | 2.740926266 | <a href="https://www.genecards.org/cgi-bin/carddisp.pl?gene=PTAFR">https://www.genecards.org/cgi-bin/carddisp.pl?gene=PTAFR</a>   |

|         |                                               |                |    |             |             |                                                                                                                                     |
|---------|-----------------------------------------------|----------------|----|-------------|-------------|-------------------------------------------------------------------------------------------------------------------------------------|
| POLB    | DNA Polymerase Beta                           | Protein Coding | 51 | GC08P042338 | 2.739527225 | <a href="https://www.genecards.org/cgi-bin/carddisp.pl?gene=POLB">https://www.genecards.org/cgi-bin/carddisp.pl?gene=POLB</a>       |
| IL4R    | Interleukin 4 Receptor                        | Protein Coding | 55 | GC16P042490 | 2.739160299 | <a href="https://www.genecards.org/cgi-bin/carddisp.pl?gene=IL4R">https://www.genecards.org/cgi-bin/carddisp.pl?gene=IL4R</a>       |
| HSD17B6 | Hydroxysteroid 17-Beta Dehydrogenase 6        | Protein Coding | 48 | GC12P056752 | 2.739024639 | <a href="https://www.genecards.org/cgi-bin/carddisp.pl?gene=HSD17B6">https://www.genecards.org/cgi-bin/carddisp.pl?gene=HSD17B6</a> |
| KHSRP   | KH-Type Splicing Regulatory Protein           | Protein Coding | 48 | GC19M006413 | 2.736800432 | <a href="https://www.genecards.org/cgi-bin/carddisp.pl?gene=KHSRP">https://www.genecards.org/cgi-bin/carddisp.pl?gene=KHSRP</a>     |
| PTPRN2  | Protein Tyrosine Phosphatase Receptor Type N2 | Protein Coding | 52 | GC07M157539 | 2.735739231 | <a href="https://www.genecards.org/cgi-bin/carddisp.pl?gene=PTPRN2">https://www.genecards.org/cgi-bin/carddisp.pl?gene=PTPRN2</a>   |
| NCL     | Nucleolin                                     | Protein Coding | 51 | GC02M231453 | 2.735020161 | <a href="https://www.genecards.org/cgi-bin/carddisp.pl?gene=NCL">https://www.genecards.org/cgi-bin/carddisp.pl?gene=NCL</a>         |
| CD47    | CD47 Molecule                                 | Protein Coding | 51 | GC03M108043 | 2.731025934 | <a href="https://www.genecards.org/cgi-bin/carddisp.pl?gene=CD47">https://www.genecards.org/cgi-bin/carddisp.pl?gene=CD47</a>       |
| CTSL    | Cathepsin L                                   | Protein Coding | 53 | GC09P087725 | 2.730602264 | <a href="https://www.genecards.org/cgi-bin/carddisp.pl?gene=CTSL">https://www.genecards.org/cgi-bin/carddisp.pl?gene=CTSL</a>       |
| RACK1   | Receptor For Activated C Kinase 1             | Protein Coding | 50 | GC05M181933 | 2.726868153 | <a href="https://www.genecards.org/cgi-bin/carddisp.pl?gene=RACK1">https://www.genecards.org/cgi-bin/carddisp.pl?gene=RACK1</a>     |
| APLNR   | Apelin Receptor                               | Protein Coding | 51 | GC11M057233 | 2.725875854 | <a href="https://www.genecards.org/cgi-bin/carddisp.pl?gene=APLNR">https://www.genecards.org/cgi-bin/carddisp.pl?gene=APLNR</a>     |
| PIAS1   | Protein Inhibitor Of Activated STAT 1         | Protein Coding | 51 | GC15P068054 | 2.72550869  | <a href="https://www.genecards.org/cgi-bin/carddisp.pl?gene=PIAS1">https://www.genecards.org/cgi-bin/carddisp.pl?gene=PIAS1</a>     |
| ARF1    | ADP Ribosylation Factor 1                     | Protein Coding | 51 | GC01P228082 | 2.724269629 | <a href="https://www.genecards.org/cgi-bin/carddisp.pl?gene=ARF1">https://www.genecards.org/cgi-bin/carddisp.pl?gene=ARF1</a>       |
| MOGAT1  | Monoacylglycerol O-Acyltransferase 1          | Protein Coding | 41 | GC02P222671 | 2.721960545 | <a href="https://www.genecards.org/cgi-bin/carddisp.pl?gene=MOGAT1">https://www.genecards.org/cgi-bin/carddisp.pl?gene=MOGAT1</a>   |
| BMP7    | Bone Morphogenetic Protein 7                  | Protein Coding | 52 | GC20M057168 | 2.72125721  | <a href="https://www.genecards.org/cgi-bin/carddisp.pl?gene=BMP7">https://www.genecards.org/cgi-bin/carddisp.pl?gene=BMP7</a>       |
| CCNB1   | Cyclin B1                                     | Protein Coding | 53 | GC05P069167 | 2.720210075 | <a href="https://www.genecards.org/cgi-bin/carddisp.pl?gene=CCNB1">https://www.genecards.org/cgi-bin/carddisp.pl?gene=CCNB1</a>     |

|        |                                                            |                |    |             |             |                                                                                                                                   |
|--------|------------------------------------------------------------|----------------|----|-------------|-------------|-----------------------------------------------------------------------------------------------------------------------------------|
| TYK2   | Tyrosine Kinase 2                                          | Protein Coding | 60 | GC19M010350 | 2.719821692 | <a href="https://www.genecards.org/cgi-bin/carddisp.pl?gene=TYK2">https://www.genecards.org/cgi-bin/carddisp.pl?gene=TYK2</a>     |
| CFLAR  | CASP8 And FADD Like Apoptosis Regulator                    | Protein Coding | 51 | GC02P201122 | 2.718475819 | <a href="https://www.genecards.org/cgi-bin/carddisp.pl?gene=CFLAR">https://www.genecards.org/cgi-bin/carddisp.pl?gene=CFLAR</a>   |
| RECK   | Reversion Inducing Cysteine Rich Protein With Kazal Motifs | Protein Coding | 47 | GC09P036036 | 2.718043327 | <a href="https://www.genecards.org/cgi-bin/carddisp.pl?gene=RECK">https://www.genecards.org/cgi-bin/carddisp.pl?gene=RECK</a>     |
| MUC5AC | Mucin 5AC, Oligomeric Mucus/Gel-Forming                    | Protein Coding | 46 | GC11P002129 | 2.716766119 | <a href="https://www.genecards.org/cgi-bin/carddisp.pl?gene=MUC5AC">https://www.genecards.org/cgi-bin/carddisp.pl?gene=MUC5AC</a> |
| CAMKK2 | Calcium/Calmodulin Dependent Protein Kinase Kinase 2       | Protein Coding | 54 | GC12M122474 | 2.714353085 | <a href="https://www.genecards.org/cgi-bin/carddisp.pl?gene=CAMKK2">https://www.genecards.org/cgi-bin/carddisp.pl?gene=CAMKK2</a> |
| LMOD1  | Leiomodin 1                                                | Protein Coding | 47 | GC01M201896 | 2.712001324 | <a href="https://www.genecards.org/cgi-bin/carddisp.pl?gene=LMOD1">https://www.genecards.org/cgi-bin/carddisp.pl?gene=LMOD1</a>   |
| CD81   | CD81 Molecule                                              | Protein Coding | 53 | GC11P002563 | 2.708006859 | <a href="https://www.genecards.org/cgi-bin/carddisp.pl?gene=CD81">https://www.genecards.org/cgi-bin/carddisp.pl?gene=CD81</a>     |
| SYP    | Synaptophysin                                              | Protein Coding | 52 | GC0XM049187 | 2.701478481 | <a href="https://www.genecards.org/cgi-bin/carddisp.pl?gene=SYP">https://www.genecards.org/cgi-bin/carddisp.pl?gene=SYP</a>       |
| FCGR2A | Fc Gamma Receptor IIa                                      | Protein Coding | 55 | GC01P161505 | 2.700136185 | <a href="https://www.genecards.org/cgi-bin/carddisp.pl?gene=FCGR2A">https://www.genecards.org/cgi-bin/carddisp.pl?gene=FCGR2A</a> |
| FMOD   | Fibromodulin                                               | Protein Coding | 48 | GC01M203340 | 2.698026896 | <a href="https://www.genecards.org/cgi-bin/carddisp.pl?gene=FMOD">https://www.genecards.org/cgi-bin/carddisp.pl?gene=FMOD</a>     |
| MBOAT1 | Membrane Bound O-Acyltransferase Domain Containing 1       | Protein Coding | 42 | GC06M020102 | 2.697533131 | <a href="https://www.genecards.org/cgi-bin/carddisp.pl?gene=MBOAT1">https://www.genecards.org/cgi-bin/carddisp.pl?gene=MBOAT1</a> |
| PAK2   | P21 (RAC1) Activated Kinase 2                              | Protein Coding | 55 | GC03P196739 | 2.692825556 | <a href="https://www.genecards.org/cgi-bin/carddisp.pl?gene=PAK2">https://www.genecards.org/cgi-bin/carddisp.pl?gene=PAK2</a>     |
| KRT19  | Keratin 19                                                 | Protein Coding | 50 | GC17M041523 | 2.688460112 | <a href="https://www.genecards.org/cgi-bin/carddisp.pl?gene=KRT19">https://www.genecards.org/cgi-bin/carddisp.pl?gene=KRT19</a>   |
| SH2B3  | SH2B Adaptor Protein 3                                     | Protein Coding | 54 | GC12P111405 | 2.684833288 | <a href="https://www.genecards.org/cgi-bin/carddisp.pl?gene=SH2B3">https://www.genecards.org/cgi-bin/carddisp.pl?gene=SH2B3</a>   |
| PCBP1  | Poly(RC) Binding Protein 1                                 | Protein Coding | 48 | GC02P070087 | 2.683332443 | <a href="https://www.genecards.org/cgi-bin/carddisp.pl?gene=PCBP1">https://www.genecards.org/cgi-bin/carddisp.pl?gene=PCBP1</a>   |

|        |                                                |                |    |             |             |                                                                                                                                   |
|--------|------------------------------------------------|----------------|----|-------------|-------------|-----------------------------------------------------------------------------------------------------------------------------------|
| LEF1   | Lymphoid Enhancer Binding Factor 1             | Protein Coding | 55 | GC04M108047 | 2.683016062 | <a href="https://www.genecards.org/cgi-bin/carddisp.pl?gene=LEF1">https://www.genecards.org/cgi-bin/carddisp.pl?gene=LEF1</a>     |
| CDX2   | Caudal Type Homeobox 2                         | Protein Coding | 48 | GC13M027962 | 2.681468248 | <a href="https://www.genecards.org/cgi-bin/carddisp.pl?gene=CDX2">https://www.genecards.org/cgi-bin/carddisp.pl?gene=CDX2</a>     |
| ACTC1  | Actin Alpha Cardiac Muscle 1                   | Protein Coding | 51 | GC15M034790 | 2.680232525 | <a href="https://www.genecards.org/cgi-bin/carddisp.pl?gene=ACTC1">https://www.genecards.org/cgi-bin/carddisp.pl?gene=ACTC1</a>   |
| LPAR1  | Lysophosphatidic Acid Receptor 1               | Protein Coding | 53 | GC09M110873 | 2.678920269 | <a href="https://www.genecards.org/cgi-bin/carddisp.pl?gene=LPAR1">https://www.genecards.org/cgi-bin/carddisp.pl?gene=LPAR1</a>   |
| KRT7   | Keratin 7                                      | Protein Coding | 48 | GC12P052232 | 2.6780653   | <a href="https://www.genecards.org/cgi-bin/carddisp.pl?gene=KRT7">https://www.genecards.org/cgi-bin/carddisp.pl?gene=KRT7</a>     |
| HAS3   | Hyaluronan Synthase 3                          | Protein Coding | 48 | GC16P069105 | 2.677442789 | <a href="https://www.genecards.org/cgi-bin/carddisp.pl?gene=HAS3">https://www.genecards.org/cgi-bin/carddisp.pl?gene=HAS3</a>     |
| FYN    | FYN Proto-Oncogene, Src Family Tyrosine Kinase | Protein Coding | 53 | GC06M111660 | 2.676315069 | <a href="https://www.genecards.org/cgi-bin/carddisp.pl?gene=FYN">https://www.genecards.org/cgi-bin/carddisp.pl?gene=FYN</a>       |
| MAP2K7 | Mitogen-Activated Protein Kinase Kinase 7      | Protein Coding | 52 | GC19P007903 | 2.675574064 | <a href="https://www.genecards.org/cgi-bin/carddisp.pl?gene=MAP2K7">https://www.genecards.org/cgi-bin/carddisp.pl?gene=MAP2K7</a> |
| HSPA9  | Heat Shock Protein Family A (Hsp70) Member 9   | Protein Coding | 54 | GC05M138554 | 2.675514698 | <a href="https://www.genecards.org/cgi-bin/carddisp.pl?gene=HSPA9">https://www.genecards.org/cgi-bin/carddisp.pl?gene=HSPA9</a>   |
| TFG    | Trafficking From ER To Golgi Regulator         | Protein Coding | 51 | GC03P100709 | 2.672077417 | <a href="https://www.genecards.org/cgi-bin/carddisp.pl?gene=TFG">https://www.genecards.org/cgi-bin/carddisp.pl?gene=TFG</a>       |
| COL3A1 | Collagen Type III Alpha 1 Chain                | Protein Coding | 54 | GC02P188974 | 2.669884205 | <a href="https://www.genecards.org/cgi-bin/carddisp.pl?gene=COL3A1">https://www.genecards.org/cgi-bin/carddisp.pl?gene=COL3A1</a> |
| MST1   | Macrophage Stimulating 1                       | Protein Coding | 53 | GC03M049683 | 2.668335438 | <a href="https://www.genecards.org/cgi-bin/carddisp.pl?gene=MST1">https://www.genecards.org/cgi-bin/carddisp.pl?gene=MST1</a>     |
| TBP    | TATA-Box Binding Protein                       | Protein Coding | 55 | GC06P170554 | 2.667933941 | <a href="https://www.genecards.org/cgi-bin/carddisp.pl?gene=TBP">https://www.genecards.org/cgi-bin/carddisp.pl?gene=TBP</a>       |
| RYR3   | Ryanodine Receptor 3                           | Protein Coding | 48 | GC15P033310 | 2.665052652 | <a href="https://www.genecards.org/cgi-bin/carddisp.pl?gene=RYR3">https://www.genecards.org/cgi-bin/carddisp.pl?gene=RYR3</a>     |
| GJA1   | Gap Junction Protein Alpha 1                   | Protein Coding | 57 | GC06P121436 | 2.663125038 | <a href="https://www.genecards.org/cgi-bin/carddisp.pl?gene=GJA1">https://www.genecards.org/cgi-bin/carddisp.pl?gene=GJA1</a>     |

|         |                                                            |                |    |             |             |                                                                                                                                     |
|---------|------------------------------------------------------------|----------------|----|-------------|-------------|-------------------------------------------------------------------------------------------------------------------------------------|
| ANK1    | Ankyrin 1                                                  | Protein Coding | 50 | GC08M041653 | 2.662607908 | <a href="https://www.genecards.org/cgi-bin/carddisp.pl?gene=ANK1">https://www.genecards.org/cgi-bin/carddisp.pl?gene=ANK1</a>       |
| SYT1    | Synaptotagmin 1                                            | Protein Coding | 55 | GC12P078863 | 2.662100077 | <a href="https://www.genecards.org/cgi-bin/carddisp.pl?gene=SYT1">https://www.genecards.org/cgi-bin/carddisp.pl?gene=SYT1</a>       |
| BLK     | BLK Proto-Oncogene, Src Family Tyrosine Kinase             | Protein Coding | 56 | GC08P011486 | 2.66164875  | <a href="https://www.genecards.org/cgi-bin/carddisp.pl?gene=BLK">https://www.genecards.org/cgi-bin/carddisp.pl?gene=BLK</a>         |
| SMAD7   | SMAD Family Member 7                                       | Protein Coding | 51 | GC18M048919 | 2.660331011 | <a href="https://www.genecards.org/cgi-bin/carddisp.pl?gene=SMAD7">https://www.genecards.org/cgi-bin/carddisp.pl?gene=SMAD7</a>     |
| LBP     | Lipopolysaccharide Binding Protein                         | Protein Coding | 51 | GC20P038346 | 2.656612635 | <a href="https://www.genecards.org/cgi-bin/carddisp.pl?gene=LBP">https://www.genecards.org/cgi-bin/carddisp.pl?gene=LBP</a>         |
| ZAP70   | Zeta Chain Of T Cell Receptor Associated Protein Kinase 70 | Protein Coding | 59 | GC02P097773 | 2.655203342 | <a href="https://www.genecards.org/cgi-bin/carddisp.pl?gene=ZAP70">https://www.genecards.org/cgi-bin/carddisp.pl?gene=ZAP70</a>     |
| JUP     | Junction Plakoglobin                                       | Protein Coding | 55 | GC17M041754 | 2.653947115 | <a href="https://www.genecards.org/cgi-bin/carddisp.pl?gene=JUP">https://www.genecards.org/cgi-bin/carddisp.pl?gene=JUP</a>         |
| UBE2K   | Ubiquitin Conjugating Enzyme E2 K                          | Protein Coding | 48 | GC04P039700 | 2.653835773 | <a href="https://www.genecards.org/cgi-bin/carddisp.pl?gene=UBE2K">https://www.genecards.org/cgi-bin/carddisp.pl?gene=UBE2K</a>     |
| FMR1    | Fragile X Messenger Ribonucleoprotein 1                    | Protein Coding | 51 | GC0XP147956 | 2.65137434  | <a href="https://www.genecards.org/cgi-bin/carddisp.pl?gene=FMR1">https://www.genecards.org/cgi-bin/carddisp.pl?gene=FMR1</a>       |
| MAP2K4  | Mitogen-Activated Protein Kinase Kinase 4                  | Protein Coding | 53 | GC17P012020 | 2.649491787 | <a href="https://www.genecards.org/cgi-bin/carddisp.pl?gene=MAP2K4">https://www.genecards.org/cgi-bin/carddisp.pl?gene=MAP2K4</a>   |
| GPR42   | G Protein-Coupled Receptor 42                              | Protein Coding | 30 | GC19P073881 | 2.649134159 | <a href="https://www.genecards.org/cgi-bin/carddisp.pl?gene=GPR42">https://www.genecards.org/cgi-bin/carddisp.pl?gene=GPR42</a>     |
| ST6GAL1 | ST6 Beta-Galactoside Alpha-2,6-Sialyltransferase 1         | Protein Coding | 51 | GC03P186930 | 2.644136429 | <a href="https://www.genecards.org/cgi-bin/carddisp.pl?gene=ST6GAL1">https://www.genecards.org/cgi-bin/carddisp.pl?gene=ST6GAL1</a> |
| NPHS1   | NPHS1 Adhesion Molecule, Nephrin                           | Protein Coding | 53 | GC19M035825 | 2.644048214 | <a href="https://www.genecards.org/cgi-bin/carddisp.pl?gene=NPHS1">https://www.genecards.org/cgi-bin/carddisp.pl?gene=NPHS1</a>     |
| XPO1    | Exportin 1                                                 | Protein Coding | 55 | GC02M061445 | 2.641967058 | <a href="https://www.genecards.org/cgi-bin/carddisp.pl?gene=XPO1">https://www.genecards.org/cgi-bin/carddisp.pl?gene=XPO1</a>       |
| TFF3    | Trefoil Factor 3                                           | Protein Coding | 47 | GC21M042311 | 2.641746759 | <a href="https://www.genecards.org/cgi-bin/carddisp.pl?gene=TFF3">https://www.genecards.org/cgi-bin/carddisp.pl?gene=TFF3</a>       |

|          |                                                        |                |    |             |             |                                                                                                                                       |
|----------|--------------------------------------------------------|----------------|----|-------------|-------------|---------------------------------------------------------------------------------------------------------------------------------------|
| TMPO     | Thymopoietin                                           | Protein Coding | 53 | GC12P098515 | 2.639974356 | <a href="https://www.genecards.org/cgi-bin/carddisp.pl?gene=TMPO">https://www.genecards.org/cgi-bin/carddisp.pl?gene=TMPO</a>         |
| GNAI1    | G Protein Subunit Alpha I1                             | Protein Coding | 53 | GC07P079769 | 2.639129162 | <a href="https://www.genecards.org/cgi-bin/carddisp.pl?gene=GNAI1">https://www.genecards.org/cgi-bin/carddisp.pl?gene=GNAI1</a>       |
| REST     | RE1 Silencing Transcription Factor                     | Protein Coding | 49 | GC04P056907 | 2.639044046 | <a href="https://www.genecards.org/cgi-bin/carddisp.pl?gene=REST">https://www.genecards.org/cgi-bin/carddisp.pl?gene=REST</a>         |
| PPP1R1B  | Protein Phosphatase 1 Regulatory Inhibitor Subunit 1B  | Protein Coding | 49 | GC17P039626 | 2.632069588 | <a href="https://www.genecards.org/cgi-bin/carddisp.pl?gene=PPP1R1B">https://www.genecards.org/cgi-bin/carddisp.pl?gene=PPP1R1B</a>   |
| IL12RB1  | Interleukin 12 Receptor Subunit Beta 1                 | Protein Coding | 52 | GC19M018058 | 2.624730587 | <a href="https://www.genecards.org/cgi-bin/carddisp.pl?gene=IL12RB1">https://www.genecards.org/cgi-bin/carddisp.pl?gene=IL12RB1</a>   |
| GHRHR    | Growth Hormone Releasing Hormone Receptor              | Protein Coding | 49 | GC07P030938 | 2.624176502 | <a href="https://www.genecards.org/cgi-bin/carddisp.pl?gene=GHRHR">https://www.genecards.org/cgi-bin/carddisp.pl?gene=GHRHR</a>       |
| EPHB4    | EPH Receptor B4                                        | Protein Coding | 60 | GC07M102433 | 2.621126175 | <a href="https://www.genecards.org/cgi-bin/carddisp.pl?gene=EPHB4">https://www.genecards.org/cgi-bin/carddisp.pl?gene=EPHB4</a>       |
| ADRA2C   | Adrenoceptor Alpha 2C                                  | Protein Coding | 52 | GC04P003766 | 2.617765427 | <a href="https://www.genecards.org/cgi-bin/carddisp.pl?gene=ADRA2C">https://www.genecards.org/cgi-bin/carddisp.pl?gene=ADRA2C</a>     |
| GLYATL1  | Glycine-N-Acyltransferase Like 1                       | Protein Coding | 40 | GC11P058906 | 2.615096807 | <a href="https://www.genecards.org/cgi-bin/carddisp.pl?gene=GLYATL1">https://www.genecards.org/cgi-bin/carddisp.pl?gene=GLYATL1</a>   |
| MICA     | MHC Class I Polypeptide-Related Sequence A             | Protein Coding | 46 | GC06P031399 | 2.612233639 | <a href="https://www.genecards.org/cgi-bin/carddisp.pl?gene=MICA">https://www.genecards.org/cgi-bin/carddisp.pl?gene=MICA</a>         |
| TP53BP1  | Tumor Protein P53 Binding Protein 1                    | Protein Coding | 50 | GC15M043403 | 2.604650736 | <a href="https://www.genecards.org/cgi-bin/carddisp.pl?gene=TP53BP1">https://www.genecards.org/cgi-bin/carddisp.pl?gene=TP53BP1</a>   |
| AGPAT4   | 1-Acylglycerol-3-Phosphate O-Acyltransferase 4         | Protein Coding | 47 | GC06M161129 | 2.601899624 | <a href="https://www.genecards.org/cgi-bin/carddisp.pl?gene=AGPAT4">https://www.genecards.org/cgi-bin/carddisp.pl?gene=AGPAT4</a>     |
| ROCK1    | Rho Associated Coiled-Coil Containing Protein Kinase 1 | Protein Coding | 56 | GC18M020946 | 2.60150075  | <a href="https://www.genecards.org/cgi-bin/carddisp.pl?gene=ROCK1">https://www.genecards.org/cgi-bin/carddisp.pl?gene=ROCK1</a>       |
| NRP1     | Neuropilin 1                                           | Protein Coding | 54 | GC10M033177 | 2.599191189 | <a href="https://www.genecards.org/cgi-bin/carddisp.pl?gene=NRP1">https://www.genecards.org/cgi-bin/carddisp.pl?gene=NRP1</a>         |
| MAPKAPK2 | MAPK Activated Protein Kinase 2                        | Protein Coding | 54 | GC01P206684 | 2.598197699 | <a href="https://www.genecards.org/cgi-bin/carddisp.pl?gene=MAPKAPK2">https://www.genecards.org/cgi-bin/carddisp.pl?gene=MAPKAPK2</a> |

|         |                                                             |                |    |             |             |                                                                                                                                     |
|---------|-------------------------------------------------------------|----------------|----|-------------|-------------|-------------------------------------------------------------------------------------------------------------------------------------|
| CCKBR   | Cholecystokinin B Receptor                                  | Protein Coding | 51 | GC11P006259 | 2.589323282 | <a href="https://www.genecards.org/cgi-bin/carddisp.pl?gene=CCKBR">https://www.genecards.org/cgi-bin/carddisp.pl?gene=CCKBR</a>     |
| TXK     | TXK Tyrosine Kinase                                         | Protein Coding | 51 | GC04M048066 | 2.589127541 | <a href="https://www.genecards.org/cgi-bin/carddisp.pl?gene=TXK">https://www.genecards.org/cgi-bin/carddisp.pl?gene=TXK</a>         |
| THEM4   | Thioesterase Superfamily Member 4                           | Protein Coding | 47 | GC01M151870 | 2.588637114 | <a href="https://www.genecards.org/cgi-bin/carddisp.pl?gene=THEM4">https://www.genecards.org/cgi-bin/carddisp.pl?gene=THEM4</a>     |
| TLR9    | Toll Like Receptor 9                                        | Protein Coding | 53 | GC03M052222 | 2.587840796 | <a href="https://www.genecards.org/cgi-bin/carddisp.pl?gene=TLR9">https://www.genecards.org/cgi-bin/carddisp.pl?gene=TLR9</a>       |
| PRKCQ   | Protein Kinase C Theta                                      | Protein Coding | 55 | GC10M006591 | 2.587505102 | <a href="https://www.genecards.org/cgi-bin/carddisp.pl?gene=PRKCQ">https://www.genecards.org/cgi-bin/carddisp.pl?gene=PRKCQ</a>     |
| PTPRN   | Protein Tyrosine Phosphatase Receptor Type N                | Protein Coding | 51 | GC02M219289 | 2.586440563 | <a href="https://www.genecards.org/cgi-bin/carddisp.pl?gene=PTPRN">https://www.genecards.org/cgi-bin/carddisp.pl?gene=PTPRN</a>     |
| LHCGR   | Luteinizing Hormone/Choriogonadotropin Receptor             | Protein Coding | 53 | GC02M048686 | 2.585967064 | <a href="https://www.genecards.org/cgi-bin/carddisp.pl?gene=LHCGR">https://www.genecards.org/cgi-bin/carddisp.pl?gene=LHCGR</a>     |
| OSM     | Oncostatin M                                                | Protein Coding | 50 | GC22M030262 | 2.585475683 | <a href="https://www.genecards.org/cgi-bin/carddisp.pl?gene=OSM">https://www.genecards.org/cgi-bin/carddisp.pl?gene=OSM</a>         |
| PITPNM1 | Phosphatidylinositol Transfer Protein Membrane Associated 1 | Protein Coding | 46 | GC11M099817 | 2.578641653 | <a href="https://www.genecards.org/cgi-bin/carddisp.pl?gene=PITPNM1">https://www.genecards.org/cgi-bin/carddisp.pl?gene=PITPNM1</a> |
| BBOX1   | Gamma-Butyrobetaine Hydroxylase 1                           | Protein Coding | 46 | GC11P027019 | 2.571772099 | <a href="https://www.genecards.org/cgi-bin/carddisp.pl?gene=BBOX1">https://www.genecards.org/cgi-bin/carddisp.pl?gene=BBOX1</a>     |
| USP8    | Ubiquitin Specific Peptidase 8                              | Protein Coding | 53 | GC15P050424 | 2.568456888 | <a href="https://www.genecards.org/cgi-bin/carddisp.pl?gene=USP8">https://www.genecards.org/cgi-bin/carddisp.pl?gene=USP8</a>       |
| MYB     | MYB Proto-Oncogene, Transcription Factor                    | Protein Coding | 55 | GC06P135180 | 2.568442822 | <a href="https://www.genecards.org/cgi-bin/carddisp.pl?gene=MYB">https://www.genecards.org/cgi-bin/carddisp.pl?gene=MYB</a>         |
| PRF1    | Perforin 1                                                  | Protein Coding | 53 | GC10M070597 | 2.566235065 | <a href="https://www.genecards.org/cgi-bin/carddisp.pl?gene=PRF1">https://www.genecards.org/cgi-bin/carddisp.pl?gene=PRF1</a>       |
| KIF5B   | Kinesin Family Member 5B                                    | Protein Coding | 51 | GC10M033629 | 2.563094139 | <a href="https://www.genecards.org/cgi-bin/carddisp.pl?gene=KIF5B">https://www.genecards.org/cgi-bin/carddisp.pl?gene=KIF5B</a>     |
| SLC9A2  | Solute Carrier Family 9 Member A2                           | Protein Coding | 48 | GC02P102620 | 2.559026003 | <a href="https://www.genecards.org/cgi-bin/carddisp.pl?gene=SLC9A2">https://www.genecards.org/cgi-bin/carddisp.pl?gene=SLC9A2</a>   |

|          |                                                 |                |    |             |             |                                                                                                                                       |
|----------|-------------------------------------------------|----------------|----|-------------|-------------|---------------------------------------------------------------------------------------------------------------------------------------|
| CXCR3    | C-X-C Motif Chemokine Receptor 3                | Protein Coding | 51 | GC0XM071615 | 2.55614996  | <a href="https://www.genecards.org/cgi-bin/carddisp.pl?gene=CXCR3">https://www.genecards.org/cgi-bin/carddisp.pl?gene=CXCR3</a>       |
| RPL15    | Ribosomal Protein L15                           | Protein Coding | 50 | GC03P023916 | 2.555617809 | <a href="https://www.genecards.org/cgi-bin/carddisp.pl?gene=RPL15">https://www.genecards.org/cgi-bin/carddisp.pl?gene=RPL15</a>       |
| DDX20    | DEAD-Box Helicase 20                            | Protein Coding | 49 | GC01P111755 | 2.543823242 | <a href="https://www.genecards.org/cgi-bin/carddisp.pl?gene=DDX20">https://www.genecards.org/cgi-bin/carddisp.pl?gene=DDX20</a>       |
| HSF1     | Heat Shock Transcription Factor 1               | Protein Coding | 53 | GC08P144291 | 2.543515205 | <a href="https://www.genecards.org/cgi-bin/carddisp.pl?gene=HSF1">https://www.genecards.org/cgi-bin/carddisp.pl?gene=HSF1</a>         |
| TRAPPC10 | Trafficking Protein Particle Complex Subunit 10 | Protein Coding | 45 | GC21P044012 | 2.542541742 | <a href="https://www.genecards.org/cgi-bin/carddisp.pl?gene=TRAPPC10">https://www.genecards.org/cgi-bin/carddisp.pl?gene=TRAPPC10</a> |
| TYRP1    | Tyrosinase Related Protein 1                    | Protein Coding | 54 | GC09P012683 | 2.541297197 | <a href="https://www.genecards.org/cgi-bin/carddisp.pl?gene=TYRP1">https://www.genecards.org/cgi-bin/carddisp.pl?gene=TYRP1</a>       |
| LGMN     | Legumain                                        | Protein Coding | 49 | GC14M092703 | 2.540930271 | <a href="https://www.genecards.org/cgi-bin/carddisp.pl?gene=LGMN">https://www.genecards.org/cgi-bin/carddisp.pl?gene=LGMN</a>         |
| IVL      | Involucrin                                      | Protein Coding | 45 | GC01P153037 | 2.537791967 | <a href="https://www.genecards.org/cgi-bin/carddisp.pl?gene=IVL">https://www.genecards.org/cgi-bin/carddisp.pl?gene=IVL</a>           |
| NEB      | Nebulin                                         | Protein Coding | 47 | GC02M151485 | 2.537733078 | <a href="https://www.genecards.org/cgi-bin/carddisp.pl?gene=NEB">https://www.genecards.org/cgi-bin/carddisp.pl?gene=NEB</a>           |
| SAFB     | Scaffold Attachment Factor B                    | Protein Coding | 46 | GC19P005623 | 2.537121773 | <a href="https://www.genecards.org/cgi-bin/carddisp.pl?gene=SAFB">https://www.genecards.org/cgi-bin/carddisp.pl?gene=SAFB</a>         |
| FGF7     | Fibroblast Growth Factor 7                      | Protein Coding | 50 | GC15P049423 | 2.536988258 | <a href="https://www.genecards.org/cgi-bin/carddisp.pl?gene=FGF7">https://www.genecards.org/cgi-bin/carddisp.pl?gene=FGF7</a>         |
| SLC7A1   | Solute Carrier Family 7 Member 1                | Protein Coding | 49 | GC13M029509 | 2.536151409 | <a href="https://www.genecards.org/cgi-bin/carddisp.pl?gene=SLC7A1">https://www.genecards.org/cgi-bin/carddisp.pl?gene=SLC7A1</a>     |
| NR2F2    | Nuclear Receptor Subfamily 2 Group F Member 2   | Protein Coding | 56 | GC15P096325 | 2.534425974 | <a href="https://www.genecards.org/cgi-bin/carddisp.pl?gene=NR2F2">https://www.genecards.org/cgi-bin/carddisp.pl?gene=NR2F2</a>       |
| TFPI     | Tissue Factor Pathway Inhibitor                 | Protein Coding | 53 | GC02M187464 | 2.532000542 | <a href="https://www.genecards.org/cgi-bin/carddisp.pl?gene=TFPI">https://www.genecards.org/cgi-bin/carddisp.pl?gene=TFPI</a>         |
| AREG     | Amphiregulin                                    | Protein Coding | 50 | GC04P074445 | 2.528548479 | <a href="https://www.genecards.org/cgi-bin/carddisp.pl?gene=AREG">https://www.genecards.org/cgi-bin/carddisp.pl?gene=AREG</a>         |

|   |         |                                                                         |                |    |             |             |                                                                                                                                     |
|---|---------|-------------------------------------------------------------------------|----------------|----|-------------|-------------|-------------------------------------------------------------------------------------------------------------------------------------|
|   | CTSC    | Cathepsin C                                                             | Protein Coding | 54 | GC11M100229 | 2.527719021 | <a href="https://www.genecards.org/cgi-bin/carddisp.pl?gene=CTSC">https://www.genecards.org/cgi-bin/carddisp.pl?gene=CTSC</a>       |
|   | CCR3    | C-C Motif Chemokine Receptor 3                                          | Protein Coding | 52 | GC03P047610 | 2.519971371 | <a href="https://www.genecards.org/cgi-bin/carddisp.pl?gene=CCR3">https://www.genecards.org/cgi-bin/carddisp.pl?gene=CCR3</a>       |
|   | ECE1    | Endothelin Converting Enzyme 1                                          | Protein Coding | 55 | GC01M021217 | 2.518996477 | <a href="https://www.genecards.org/cgi-bin/carddisp.pl?gene=ECE1">https://www.genecards.org/cgi-bin/carddisp.pl?gene=ECE1</a>       |
|   | CRKL    | CRK Like Proto-Oncogene, Adaptor Protein                                | Protein Coding | 53 | GC22P020917 | 2.518113375 | <a href="https://www.genecards.org/cgi-bin/carddisp.pl?gene=CRKL">https://www.genecards.org/cgi-bin/carddisp.pl?gene=CRKL</a>       |
|   | CRHR1   | Corticotropin Releasing Hormone Receptor 1                              | Protein Coding | 51 | GC17P045784 | 2.517398357 | <a href="https://www.genecards.org/cgi-bin/carddisp.pl?gene=CRHR1">https://www.genecards.org/cgi-bin/carddisp.pl?gene=CRHR1</a>     |
| T | AASDHPP | Aminoadipate-Semialdehyde Dehydrogenase-Phosphopantetheinyl Transferase | Protein Coding | 44 | GC11P106075 | 2.514085293 | <a href="https://www.genecards.org/cgi-bin/carddisp.pl?gene=AASDHPP">https://www.genecards.org/cgi-bin/carddisp.pl?gene=AASDHPP</a> |
|   | FCGR3B  | Fc Gamma Receptor IIIb                                                  | Protein Coding | 50 | GC01M161623 | 2.514079332 | <a href="https://www.genecards.org/cgi-bin/carddisp.pl?gene=FCGR3B">https://www.genecards.org/cgi-bin/carddisp.pl?gene=FCGR3B</a>   |
|   | ELOC    | Elongin C                                                               | Protein Coding | 48 | GC08M073939 | 2.512938499 | <a href="https://www.genecards.org/cgi-bin/carddisp.pl?gene=ELOC">https://www.genecards.org/cgi-bin/carddisp.pl?gene=ELOC</a>       |
|   | CA3     | Carbonic Anhydrase 3                                                    | Protein Coding | 48 | GC08P085373 | 2.505985737 | <a href="https://www.genecards.org/cgi-bin/carddisp.pl?gene=CA3">https://www.genecards.org/cgi-bin/carddisp.pl?gene=CA3</a>         |
|   | DDX1    | DEAD-Box Helicase 1                                                     | Protein Coding | 50 | GC02P015591 | 2.50277853  | <a href="https://www.genecards.org/cgi-bin/carddisp.pl?gene=DDX1">https://www.genecards.org/cgi-bin/carddisp.pl?gene=DDX1</a>       |
|   | SOCS2   | Suppressor Of Cytokine Signaling 2                                      | Protein Coding | 50 | GC12P093569 | 2.50228858  | <a href="https://www.genecards.org/cgi-bin/carddisp.pl?gene=SOCS2">https://www.genecards.org/cgi-bin/carddisp.pl?gene=SOCS2</a>     |
|   | BAZ2B   | Bromodomain Adjacent To Zinc Finger Domain 2B                           | Protein Coding | 47 | GC02M159318 | 2.50156641  | <a href="https://www.genecards.org/cgi-bin/carddisp.pl?gene=BAZ2B">https://www.genecards.org/cgi-bin/carddisp.pl?gene=BAZ2B</a>     |
|   | KISS1R  | KISS1 Receptor                                                          | Protein Coding | 53 | GC19P000917 | 2.501128435 | <a href="https://www.genecards.org/cgi-bin/carddisp.pl?gene=KISS1R">https://www.genecards.org/cgi-bin/carddisp.pl?gene=KISS1R</a>   |
|   | ENPP7   | Ectonucleotide Pyrophosphatase/Phosphodiesterase 7                      | Protein Coding | 44 | GC17P079730 | 2.501049042 | <a href="https://www.genecards.org/cgi-bin/carddisp.pl?gene=ENPP7">https://www.genecards.org/cgi-bin/carddisp.pl?gene=ENPP7</a>     |
|   | RPS6KA3 | Ribosomal Protein S6 Kinase A3                                          | Protein Coding | 59 | GC0XM020149 | 2.500823259 | <a href="https://www.genecards.org/cgi-bin/carddisp.pl?gene=RPS6KA3">https://www.genecards.org/cgi-bin/carddisp.pl?gene=RPS6KA3</a> |

|          |                                                |                |    |             |             |                                                                                                                                       |
|----------|------------------------------------------------|----------------|----|-------------|-------------|---------------------------------------------------------------------------------------------------------------------------------------|
| TEK      | TEK Receptor Tyrosine Kinase                   | Protein Coding | 58 | GC09P027109 | 2.500086546 | <a href="https://www.genecards.org/cgi-bin/carddisp.pl?gene=TEK">https://www.genecards.org/cgi-bin/carddisp.pl?gene=TEK</a>           |
| CSK      | C-Terminal Src Kinase                          | Protein Coding | 53 | GC15P074782 | 2.496485472 | <a href="https://www.genecards.org/cgi-bin/carddisp.pl?gene=CSK">https://www.genecards.org/cgi-bin/carddisp.pl?gene=CSK</a>           |
| MPL      | MPL Proto-Oncogene, Thrombopoietin Receptor    | Protein Coding | 55 | GC01P043337 | 2.496141434 | <a href="https://www.genecards.org/cgi-bin/carddisp.pl?gene=MPL">https://www.genecards.org/cgi-bin/carddisp.pl?gene=MPL</a>           |
| PAPPA    | Pappalysin 1                                   | Protein Coding | 50 | GC09P119606 | 2.495812654 | <a href="https://www.genecards.org/cgi-bin/carddisp.pl?gene=PAPPA">https://www.genecards.org/cgi-bin/carddisp.pl?gene=PAPPA</a>       |
| ARRB2    | Arrestin Beta 2                                | Protein Coding | 51 | GC17P004711 | 2.491093874 | <a href="https://www.genecards.org/cgi-bin/carddisp.pl?gene=ARRB2">https://www.genecards.org/cgi-bin/carddisp.pl?gene=ARRB2</a>       |
| SPI1     | Spi-1 Proto-Oncogene                           | Protein Coding | 50 | GC11M099368 | 2.48957324  | <a href="https://www.genecards.org/cgi-bin/carddisp.pl?gene=SPI1">https://www.genecards.org/cgi-bin/carddisp.pl?gene=SPI1</a>         |
| EPOR     | Erythropoietin Receptor                        | Protein Coding | 56 | GC19M011377 | 2.486668587 | <a href="https://www.genecards.org/cgi-bin/carddisp.pl?gene=EPOR">https://www.genecards.org/cgi-bin/carddisp.pl?gene=EPOR</a>         |
| PRKCG    | Protein Kinase C Gamma                         | Protein Coding | 58 | GC19P053879 | 2.486482143 | <a href="https://www.genecards.org/cgi-bin/carddisp.pl?gene=PRKCG">https://www.genecards.org/cgi-bin/carddisp.pl?gene=PRKCG</a>       |
| ROS1     | ROS Proto-Oncogene 1, Receptor Tyrosine Kinase | Protein Coding | 53 | GC06M117287 | 2.483052492 | <a href="https://www.genecards.org/cgi-bin/carddisp.pl?gene=ROS1">https://www.genecards.org/cgi-bin/carddisp.pl?gene=ROS1</a>         |
| SULT1C2  | Sulfotransferase Family 1C Member 2            | Protein Coding | 48 | GC02P108288 | 2.480620861 | <a href="https://www.genecards.org/cgi-bin/carddisp.pl?gene=SULT1C2">https://www.genecards.org/cgi-bin/carddisp.pl?gene=SULT1C2</a>   |
| IL33     | Interleukin 33                                 | Protein Coding | 46 | GC09P007685 | 2.480547905 | <a href="https://www.genecards.org/cgi-bin/carddisp.pl?gene=IL33">https://www.genecards.org/cgi-bin/carddisp.pl?gene=IL33</a>         |
| C5AR1    | Complement C5a Receptor 1                      | Protein Coding | 51 | GC19P047290 | 2.479447842 | <a href="https://www.genecards.org/cgi-bin/carddisp.pl?gene=C5AR1">https://www.genecards.org/cgi-bin/carddisp.pl?gene=C5AR1</a>       |
| TMPRSS15 | Transmembrane Serine Protease 15               | Protein Coding | 51 | GC21M018269 | 2.477105141 | <a href="https://www.genecards.org/cgi-bin/carddisp.pl?gene=TMPRSS15">https://www.genecards.org/cgi-bin/carddisp.pl?gene=TMPRSS15</a> |
| CHI3L1   | Chitinase 3 Like 1                             | Protein Coding | 51 | GC01M203148 | 2.477016211 | <a href="https://www.genecards.org/cgi-bin/carddisp.pl?gene=CHI3L1">https://www.genecards.org/cgi-bin/carddisp.pl?gene=CHI3L1</a>     |
| DAXX     | Death Domain Associated Protein                | Protein Coding | 50 | GC06M033318 | 2.475946665 | <a href="https://www.genecards.org/cgi-bin/carddisp.pl?gene=DAXX">https://www.genecards.org/cgi-bin/carddisp.pl?gene=DAXX</a>         |

|        |                                              |                |    |             |             |                                                                                                                                   |
|--------|----------------------------------------------|----------------|----|-------------|-------------|-----------------------------------------------------------------------------------------------------------------------------------|
| MTF1   | Metal Regulatory Transcription Factor 1      | Protein Coding | 47 | GC01M037810 | 2.473935127 | <a href="https://www.genecards.org/cgi-bin/carddisp.pl?gene=MTF1">https://www.genecards.org/cgi-bin/carddisp.pl?gene=MTF1</a>     |
| ITIH4  | Inter-Alpha-Trypsin Inhibitor Heavy Chain 4  | Protein Coding | 50 | GC03M052812 | 2.473416805 | <a href="https://www.genecards.org/cgi-bin/carddisp.pl?gene=ITIH4">https://www.genecards.org/cgi-bin/carddisp.pl?gene=ITIH4</a>   |
| GIPC1  | GIPC PDZ Domain Containing Family Member 1   | Protein Coding | 51 | GC19M014689 | 2.472416639 | <a href="https://www.genecards.org/cgi-bin/carddisp.pl?gene=GIPC1">https://www.genecards.org/cgi-bin/carddisp.pl?gene=GIPC1</a>   |
| ILK    | Integrin Linked Kinase                       | Protein Coding | 52 | GC11P006604 | 2.47030139  | <a href="https://www.genecards.org/cgi-bin/carddisp.pl?gene=ILK">https://www.genecards.org/cgi-bin/carddisp.pl?gene=ILK</a>       |
| KRT16  | Keratin 16                                   | Protein Coding | 50 | GC17M041609 | 2.468029022 | <a href="https://www.genecards.org/cgi-bin/carddisp.pl?gene=KRT16">https://www.genecards.org/cgi-bin/carddisp.pl?gene=KRT16</a>   |
| NPR1   | Natriuretic Peptide Receptor 1               | Protein Coding | 53 | GC01P153922 | 2.459864855 | <a href="https://www.genecards.org/cgi-bin/carddisp.pl?gene=NPR1">https://www.genecards.org/cgi-bin/carddisp.pl?gene=NPR1</a>     |
| CRK    | CRK Proto-Oncogene, Adaptor Protein          | Protein Coding | 50 | GC17M001420 | 2.459316969 | <a href="https://www.genecards.org/cgi-bin/carddisp.pl?gene=CRK">https://www.genecards.org/cgi-bin/carddisp.pl?gene=CRK</a>       |
| VAMP2  | Vesicle Associated Membrane Protein 2        | Protein Coding | 50 | GC17M011050 | 2.459011793 | <a href="https://www.genecards.org/cgi-bin/carddisp.pl?gene=VAMP2">https://www.genecards.org/cgi-bin/carddisp.pl?gene=VAMP2</a>   |
| PDYN   | Prodynorphin                                 | Protein Coding | 51 | GC20M001978 | 2.456013918 | <a href="https://www.genecards.org/cgi-bin/carddisp.pl?gene=PDYN">https://www.genecards.org/cgi-bin/carddisp.pl?gene=PDYN</a>     |
| PTGER1 | Prostaglandin E Receptor 1                   | Protein Coding | 47 | GC19M014687 | 2.453777313 | <a href="https://www.genecards.org/cgi-bin/carddisp.pl?gene=PTGER1">https://www.genecards.org/cgi-bin/carddisp.pl?gene=PTGER1</a> |
| PAX2   | Paired Box 2                                 | Protein Coding | 53 | GC10P100735 | 2.451199532 | <a href="https://www.genecards.org/cgi-bin/carddisp.pl?gene=PAX2">https://www.genecards.org/cgi-bin/carddisp.pl?gene=PAX2</a>     |
| HSPB2  | Heat Shock Protein Family B (Small) Member 2 | Protein Coding | 46 | GC11P112012 | 2.450934172 | <a href="https://www.genecards.org/cgi-bin/carddisp.pl?gene=HSPB2">https://www.genecards.org/cgi-bin/carddisp.pl?gene=HSPB2</a>   |
| BLMH   | Bleomycin Hydrolase                          | Protein Coding | 50 | GC17M030248 | 2.450750828 | <a href="https://www.genecards.org/cgi-bin/carddisp.pl?gene=BLMH">https://www.genecards.org/cgi-bin/carddisp.pl?gene=BLMH</a>     |
| AIF1   | Allograft Inflammatory Factor 1              | Protein Coding | 45 | GC06P092153 | 2.450322866 | <a href="https://www.genecards.org/cgi-bin/carddisp.pl?gene=AIF1">https://www.genecards.org/cgi-bin/carddisp.pl?gene=AIF1</a>     |
| NRG3   | Neuregulin 3                                 | Protein Coding | 50 | GC10P094473 | 2.449428082 | <a href="https://www.genecards.org/cgi-bin/carddisp.pl?gene=NRG3">https://www.genecards.org/cgi-bin/carddisp.pl?gene=NRG3</a>     |

|        |                                                         |                |    |             |             |                                                                                                                                   |
|--------|---------------------------------------------------------|----------------|----|-------------|-------------|-----------------------------------------------------------------------------------------------------------------------------------|
| VEGFC  | Vascular Endothelial Growth Factor C                    | Protein Coding | 53 | GC04M176683 | 2.448032379 | <a href="https://www.genecards.org/cgi-bin/carddisp.pl?gene=VEGFC">https://www.genecards.org/cgi-bin/carddisp.pl?gene=VEGFC</a>   |
| PIGW   | Phosphatidylinositol Glycan Anchor Biosynthesis Class W | Protein Coding | 43 | GC17P036534 | 2.446613312 | <a href="https://www.genecards.org/cgi-bin/carddisp.pl?gene=PIGW">https://www.genecards.org/cgi-bin/carddisp.pl?gene=PIGW</a>     |
| SPRY2  | Sprouty RTK Signaling Antagonist 2                      | Protein Coding | 52 | GC13M080335 | 2.445711136 | <a href="https://www.genecards.org/cgi-bin/carddisp.pl?gene=SPRY2">https://www.genecards.org/cgi-bin/carddisp.pl?gene=SPRY2</a>   |
| IQGAP1 | IQ Motif Containing GTPase Activating Protein 1         | Protein Coding | 50 | GC15P090388 | 2.445117474 | <a href="https://www.genecards.org/cgi-bin/carddisp.pl?gene=IQGAP1">https://www.genecards.org/cgi-bin/carddisp.pl?gene=IQGAP1</a> |
| PVALB  | Parvalbumin                                             | Protein Coding | 47 | GC22M036800 | 2.444863796 | <a href="https://www.genecards.org/cgi-bin/carddisp.pl?gene=PVALB">https://www.genecards.org/cgi-bin/carddisp.pl?gene=PVALB</a>   |
| AMDHD1 | Amidohydrolase Domain Containing 1                      | Protein Coding | 43 | GC12P095943 | 2.444291115 | <a href="https://www.genecards.org/cgi-bin/carddisp.pl?gene=AMDHD1">https://www.genecards.org/cgi-bin/carddisp.pl?gene=AMDHD1</a> |
| BAK1   | BCL2 Antagonist/Killer 1                                | Protein Coding | 52 | GC06M033572 | 2.443449974 | <a href="https://www.genecards.org/cgi-bin/carddisp.pl?gene=BAK1">https://www.genecards.org/cgi-bin/carddisp.pl?gene=BAK1</a>     |
| NRG1   | Neuregulin 1                                            | Protein Coding | 55 | GC08P031639 | 2.442706108 | <a href="https://www.genecards.org/cgi-bin/carddisp.pl?gene=NRG1">https://www.genecards.org/cgi-bin/carddisp.pl?gene=NRG1</a>     |
| CPB2   | Carboxypeptidase B2                                     | Protein Coding | 51 | GC13M046053 | 2.441707611 | <a href="https://www.genecards.org/cgi-bin/carddisp.pl?gene=CPB2">https://www.genecards.org/cgi-bin/carddisp.pl?gene=CPB2</a>     |
| EZR    | Ezrin                                                   | Protein Coding | 53 | GC06M158765 | 2.441425562 | <a href="https://www.genecards.org/cgi-bin/carddisp.pl?gene=EZR">https://www.genecards.org/cgi-bin/carddisp.pl?gene=EZR</a>       |
| AACS   | Acetoacetyl-CoA Synthetase                              | Protein Coding | 46 | GC12P125065 | 2.440374613 | <a href="https://www.genecards.org/cgi-bin/carddisp.pl?gene=AACS">https://www.genecards.org/cgi-bin/carddisp.pl?gene=AACS</a>     |
| BACH2  | BTB Domain And CNC Homolog 2                            | Protein Coding | 50 | GC06M089926 | 2.43955183  | <a href="https://www.genecards.org/cgi-bin/carddisp.pl?gene=BACH2">https://www.genecards.org/cgi-bin/carddisp.pl?gene=BACH2</a>   |
| NTF3   | Neurotrophin 3                                          | Protein Coding | 51 | GC12P023503 | 2.429748535 | <a href="https://www.genecards.org/cgi-bin/carddisp.pl?gene=NTF3">https://www.genecards.org/cgi-bin/carddisp.pl?gene=NTF3</a>     |
| APLP2  | Amyloid Beta Precursor Like Protein 2                   | Protein Coding | 49 | GC11P130069 | 2.429710865 | <a href="https://www.genecards.org/cgi-bin/carddisp.pl?gene=APLP2">https://www.genecards.org/cgi-bin/carddisp.pl?gene=APLP2</a>   |
| EIF4G1 | Eukaryotic Translation Initiation Factor 4 Gamma 1      | Protein Coding | 54 | GC03P184314 | 2.428409338 | <a href="https://www.genecards.org/cgi-bin/carddisp.pl?gene=EIF4G1">https://www.genecards.org/cgi-bin/carddisp.pl?gene=EIF4G1</a> |

|              |                                                |                    |    |             |             |                                                                                                                                               |
|--------------|------------------------------------------------|--------------------|----|-------------|-------------|-----------------------------------------------------------------------------------------------------------------------------------------------|
| MAP2         | Microtubule Associated Protein 2               | Protein Coding     | 51 | GC02P209424 | 2.428044796 | <a href="https://www.genecards.org/cgi-bin/carddisp.pl?gene=MAP2">https://www.genecards.org/cgi-bin/carddisp.pl?gene=MAP2</a>                 |
| PGF          | Placental Growth Factor                        | Protein Coding     | 50 | GC14M074941 | 2.426606417 | <a href="https://www.genecards.org/cgi-bin/carddisp.pl?gene=PGF">https://www.genecards.org/cgi-bin/carddisp.pl?gene=PGF</a>                   |
| WEE1         | WEE1 G2 Checkpoint Kinase                      | Protein Coding     | 54 | GC11P009573 | 2.426380873 | <a href="https://www.genecards.org/cgi-bin/carddisp.pl?gene=WEE1">https://www.genecards.org/cgi-bin/carddisp.pl?gene=WEE1</a>                 |
| FCGRT        | Fc Gamma Receptor And Transporter              | Protein Coding     | 50 | GC19P049506 | 2.42273283  | <a href="https://www.genecards.org/cgi-bin/carddisp.pl?gene=FCGRT">https://www.genecards.org/cgi-bin/carddisp.pl?gene=FCGRT</a>               |
| CCL27        | C-C Motif Chemokine Ligand 27                  | Protein Coding     | 42 | GC09M034662 | 2.421966791 | <a href="https://www.genecards.org/cgi-bin/carddisp.pl?gene=CCL27">https://www.genecards.org/cgi-bin/carddisp.pl?gene=CCL27</a>               |
| CD9          | CD9 Molecule                                   | Protein Coding     | 51 | GC12P023510 | 2.421341419 | <a href="https://www.genecards.org/cgi-bin/carddisp.pl?gene=CD9">https://www.genecards.org/cgi-bin/carddisp.pl?gene=CD9</a>                   |
| MSN          | Moesin                                         | Protein Coding     | 55 | GC0XP065588 | 2.420360327 | <a href="https://www.genecards.org/cgi-bin/carddisp.pl?gene=MSN">https://www.genecards.org/cgi-bin/carddisp.pl?gene=MSN</a>                   |
| LOC110806262 | Solute Carrier Family 6 Member 4 Gene Promoter | Functional Element | 3  | GC17P030235 | 2.417027235 | <a href="https://www.genecards.org/cgi-bin/carddisp.pl?gene=LOC110806262">https://www.genecards.org/cgi-bin/carddisp.pl?gene=LOC110806262</a> |
| BDKRB2       | Bradykinin Receptor B2                         | Protein Coding     | 52 | GC14P096205 | 2.415146828 | <a href="https://www.genecards.org/cgi-bin/carddisp.pl?gene=BDKRB2">https://www.genecards.org/cgi-bin/carddisp.pl?gene=BDKRB2</a>             |
| GGCT         | Gamma-Glutamylcyclotransferase                 | Protein Coding     | 46 | GC07M030496 | 2.414832115 | <a href="https://www.genecards.org/cgi-bin/carddisp.pl?gene=GGCT">https://www.genecards.org/cgi-bin/carddisp.pl?gene=GGCT</a>                 |
| MPZ          | Myelin Protein Zero                            | Protein Coding     | 52 | GC01M161304 | 2.414045811 | <a href="https://www.genecards.org/cgi-bin/carddisp.pl?gene=MPZ">https://www.genecards.org/cgi-bin/carddisp.pl?gene=MPZ</a>                   |
| BMPR1B       | Bone Morphogenetic Protein Receptor Type 1B    | Protein Coding     | 56 | GC04P094757 | 2.412981272 | <a href="https://www.genecards.org/cgi-bin/carddisp.pl?gene=BMPR1B">https://www.genecards.org/cgi-bin/carddisp.pl?gene=BMPR1B</a>             |
| CHGB         | Chromogranin B                                 | Protein Coding     | 48 | GC20P005911 | 2.411474943 | <a href="https://www.genecards.org/cgi-bin/carddisp.pl?gene=CHGB">https://www.genecards.org/cgi-bin/carddisp.pl?gene=CHGB</a>                 |
| ITGA3        | Integrin Subunit Alpha 3                       | Protein Coding     | 55 | GC17P050055 | 2.40312171  | <a href="https://www.genecards.org/cgi-bin/carddisp.pl?gene=ITGA3">https://www.genecards.org/cgi-bin/carddisp.pl?gene=ITGA3</a>               |
| TPT1         | Tumor Protein, Translationally-Controlled 1    | Protein Coding     | 53 | GC13M045333 | 2.400903463 | <a href="https://www.genecards.org/cgi-bin/carddisp.pl?gene=TPT1">https://www.genecards.org/cgi-bin/carddisp.pl?gene=TPT1</a>                 |

|          |                                                       |                |    |             |             |                                                                                                                                       |
|----------|-------------------------------------------------------|----------------|----|-------------|-------------|---------------------------------------------------------------------------------------------------------------------------------------|
| PIK3R3   | Phosphoinositide-3-Kinase Regulatory Subunit 3        | Protein Coding | 50 | GC01M046041 | 2.399698496 | <a href="https://www.genecards.org/cgi-bin/carddisp.pl?gene=PIK3R3">https://www.genecards.org/cgi-bin/carddisp.pl?gene=PIK3R3</a>     |
| FSHB     | Follicle Stimulating Hormone Subunit Beta             | Protein Coding | 51 | GC11P030210 | 2.397188187 | <a href="https://www.genecards.org/cgi-bin/carddisp.pl?gene=FSHB">https://www.genecards.org/cgi-bin/carddisp.pl?gene=FSHB</a>         |
| GABBR1   | Gamma-Aminobutyric Acid Type B Receptor Subunit 1     | Protein Coding | 53 | GC06M029555 | 2.396708727 | <a href="https://www.genecards.org/cgi-bin/carddisp.pl?gene=GABBR1">https://www.genecards.org/cgi-bin/carddisp.pl?gene=GABBR1</a>     |
| PICK1    | Protein Interacting With PRKCA 1                      | Protein Coding | 50 | GC22P038056 | 2.396637917 | <a href="https://www.genecards.org/cgi-bin/carddisp.pl?gene=PICK1">https://www.genecards.org/cgi-bin/carddisp.pl?gene=PICK1</a>       |
| CAMK4    | Calcium/Calmodulin Dependent Protein Kinase IV        | Protein Coding | 52 | GC05P111223 | 2.395980835 | <a href="https://www.genecards.org/cgi-bin/carddisp.pl?gene=CAMK4">https://www.genecards.org/cgi-bin/carddisp.pl?gene=CAMK4</a>       |
| SND1     | Staphylococcal Nuclease And Tudor Domain Containing 1 | Protein Coding | 48 | GC07P127652 | 2.395704985 | <a href="https://www.genecards.org/cgi-bin/carddisp.pl?gene=SND1">https://www.genecards.org/cgi-bin/carddisp.pl?gene=SND1</a>         |
| HDAC7    | Histone Deacetylase 7                                 | Protein Coding | 53 | GC12M047782 | 2.395572424 | <a href="https://www.genecards.org/cgi-bin/carddisp.pl?gene=HDAC7">https://www.genecards.org/cgi-bin/carddisp.pl?gene=HDAC7</a>       |
| SERPINB3 | Serpin Family B Member 3                              | Protein Coding | 47 | GC18M063655 | 2.395550489 | <a href="https://www.genecards.org/cgi-bin/carddisp.pl?gene=SERPINB3">https://www.genecards.org/cgi-bin/carddisp.pl?gene=SERPINB3</a> |
| EGR1     | Early Growth Response 1                               | Protein Coding | 52 | GC05P138465 | 2.392300129 | <a href="https://www.genecards.org/cgi-bin/carddisp.pl?gene=EGR1">https://www.genecards.org/cgi-bin/carddisp.pl?gene=EGR1</a>         |
| IRS4     | Insulin Receptor Substrate 4                          | Protein Coding | 47 | GC0XM108720 | 2.391109467 | <a href="https://www.genecards.org/cgi-bin/carddisp.pl?gene=IRS4">https://www.genecards.org/cgi-bin/carddisp.pl?gene=IRS4</a>         |
| EIF3A    | Eukaryotic Translation Initiation Factor 3 Subunit A  | Protein Coding | 51 | GC10M119034 | 2.389075279 | <a href="https://www.genecards.org/cgi-bin/carddisp.pl?gene=EIF3A">https://www.genecards.org/cgi-bin/carddisp.pl?gene=EIF3A</a>       |
| GDNF     | Glial Cell Derived Neurotrophic Factor                | Protein Coding | 56 | GC05M037812 | 2.386838436 | <a href="https://www.genecards.org/cgi-bin/carddisp.pl?gene=GDNF">https://www.genecards.org/cgi-bin/carddisp.pl?gene=GDNF</a>         |
| ARRB1    | Arrestin Beta 1                                       | Protein Coding | 51 | GC11M100029 | 2.385669708 | <a href="https://www.genecards.org/cgi-bin/carddisp.pl?gene=ARRB1">https://www.genecards.org/cgi-bin/carddisp.pl?gene=ARRB1</a>       |
| KRT5     | Keratin 5                                             | Protein Coding | 52 | GC12M052514 | 2.385361433 | <a href="https://www.genecards.org/cgi-bin/carddisp.pl?gene=KRT5">https://www.genecards.org/cgi-bin/carddisp.pl?gene=KRT5</a>         |
| SLC22A9  | Solute Carrier Family 22 Member 9                     | Protein Coding | 43 | GC11P063388 | 2.381622076 | <a href="https://www.genecards.org/cgi-bin/carddisp.pl?gene=SLC22A9">https://www.genecards.org/cgi-bin/carddisp.pl?gene=SLC22A9</a>   |

|        |                                                  |                |    |             |             |                                                                                                                                   |
|--------|--------------------------------------------------|----------------|----|-------------|-------------|-----------------------------------------------------------------------------------------------------------------------------------|
| MUC16  | Mucin 16, Cell Surface Associated                | Protein Coding | 44 | GC19M008848 | 2.38140893  | <a href="https://www.genecards.org/cgi-bin/carddisp.pl?gene=MUC16">https://www.genecards.org/cgi-bin/carddisp.pl?gene=MUC16</a>   |
| ITCH   | Itchy E3 Ubiquitin Protein Ligase                | Protein Coding | 53 | GC20P034363 | 2.380997658 | <a href="https://www.genecards.org/cgi-bin/carddisp.pl?gene=ITCH">https://www.genecards.org/cgi-bin/carddisp.pl?gene=ITCH</a>     |
| VCL    | Vinculin                                         | Protein Coding | 54 | GC10P073995 | 2.380882263 | <a href="https://www.genecards.org/cgi-bin/carddisp.pl?gene=VCL">https://www.genecards.org/cgi-bin/carddisp.pl?gene=VCL</a>       |
| TUBA1B | Tubulin Alpha 1b                                 | Protein Coding | 51 | GC12M049127 | 2.375025034 | <a href="https://www.genecards.org/cgi-bin/carddisp.pl?gene=TUBA1B">https://www.genecards.org/cgi-bin/carddisp.pl?gene=TUBA1B</a> |
| EEF1D  | Eukaryotic Translation Elongation Factor 1 Delta | Protein Coding | 47 | GC08M143579 | 2.374794006 | <a href="https://www.genecards.org/cgi-bin/carddisp.pl?gene=EEF1D">https://www.genecards.org/cgi-bin/carddisp.pl?gene=EEF1D</a>   |
| CAMP   | Cathelicidin Antimicrobial Peptide               | Protein Coding | 46 | GC03P049961 | 2.373255253 | <a href="https://www.genecards.org/cgi-bin/carddisp.pl?gene=CAMP">https://www.genecards.org/cgi-bin/carddisp.pl?gene=CAMP</a>     |
| ITGB4  | Integrin Subunit Beta 4                          | Protein Coding | 56 | GC17P075721 | 2.372350454 | <a href="https://www.genecards.org/cgi-bin/carddisp.pl?gene=ITGB4">https://www.genecards.org/cgi-bin/carddisp.pl?gene=ITGB4</a>   |
| ASIC1  | Acid Sensing Ion Channel Subunit 1               | Protein Coding | 52 | GC12P050057 | 2.370299101 | <a href="https://www.genecards.org/cgi-bin/carddisp.pl?gene=ASIC1">https://www.genecards.org/cgi-bin/carddisp.pl?gene=ASIC1</a>   |
| GTF2I  | General Transcription Factor Iii                 | Protein Coding | 47 | GC07P076418 | 2.37008667  | <a href="https://www.genecards.org/cgi-bin/carddisp.pl?gene=GTF2I">https://www.genecards.org/cgi-bin/carddisp.pl?gene=GTF2I</a>   |
| CYB561 | Cytochrome B561                                  | Protein Coding | 48 | GC17M063432 | 2.368448734 | <a href="https://www.genecards.org/cgi-bin/carddisp.pl?gene=CYB561">https://www.genecards.org/cgi-bin/carddisp.pl?gene=CYB561</a> |
| MINPP1 | Multiple Inositol-Polyphosphate Phosphatase 1    | Protein Coding | 53 | GC10P087504 | 2.367403507 | <a href="https://www.genecards.org/cgi-bin/carddisp.pl?gene=MINPP1">https://www.genecards.org/cgi-bin/carddisp.pl?gene=MINPP1</a> |
| STMN1  | Stathmin 1                                       | Protein Coding | 51 | GC01M025884 | 2.365449429 | <a href="https://www.genecards.org/cgi-bin/carddisp.pl?gene=STMN1">https://www.genecards.org/cgi-bin/carddisp.pl?gene=STMN1</a>   |
| CISH   | Cytokine Inducible SH2 Containing Protein        | Protein Coding | 52 | GC03M051766 | 2.364514351 | <a href="https://www.genecards.org/cgi-bin/carddisp.pl?gene=CISH">https://www.genecards.org/cgi-bin/carddisp.pl?gene=CISH</a>     |
| PELP1  | Proline, Glutamate And Leucine Rich Protein 1    | Protein Coding | 46 | GC17M004669 | 2.364390135 | <a href="https://www.genecards.org/cgi-bin/carddisp.pl?gene=PELP1">https://www.genecards.org/cgi-bin/carddisp.pl?gene=PELP1</a>   |
| CXADR  | CXADR Ig-Like Cell Adhesion Molecule             | Protein Coding | 50 | GC21P017513 | 2.361170053 | <a href="https://www.genecards.org/cgi-bin/carddisp.pl?gene=CXADR">https://www.genecards.org/cgi-bin/carddisp.pl?gene=CXADR</a>   |

|         |                                                     |                |    |             |             |                                                                                                                                     |
|---------|-----------------------------------------------------|----------------|----|-------------|-------------|-------------------------------------------------------------------------------------------------------------------------------------|
| CTTN    | Cortactin                                           | Protein Coding | 50 | GC11P070398 | 2.358932734 | <a href="https://www.genecards.org/cgi-bin/carddisp.pl?gene=CTTN">https://www.genecards.org/cgi-bin/carddisp.pl?gene=CTTN</a>       |
| FOLR3   | Folate Receptor Gamma                               | Protein Coding | 46 | GC11P072114 | 2.358604431 | <a href="https://www.genecards.org/cgi-bin/carddisp.pl?gene=FOLR3">https://www.genecards.org/cgi-bin/carddisp.pl?gene=FOLR3</a>     |
| HAT1    | Histone Acetyltransferase 1                         | Protein Coding | 49 | GC02P171922 | 2.356448412 | <a href="https://www.genecards.org/cgi-bin/carddisp.pl?gene=HAT1">https://www.genecards.org/cgi-bin/carddisp.pl?gene=HAT1</a>       |
| IFI27   | Interferon Alpha Inducible Protein 27               | Protein Coding | 44 | GC14P094104 | 2.356122971 | <a href="https://www.genecards.org/cgi-bin/carddisp.pl?gene=IFI27">https://www.genecards.org/cgi-bin/carddisp.pl?gene=IFI27</a>     |
| RYR2    | Ryanodine Receptor 2                                | Protein Coding | 53 | GC01P237042 | 2.352290869 | <a href="https://www.genecards.org/cgi-bin/carddisp.pl?gene=RYR2">https://www.genecards.org/cgi-bin/carddisp.pl?gene=RYR2</a>       |
| RHO     | Rhodopsin                                           | Protein Coding | 55 | GC03P134990 | 2.350380659 | <a href="https://www.genecards.org/cgi-bin/carddisp.pl?gene=RHO">https://www.genecards.org/cgi-bin/carddisp.pl?gene=RHO</a>         |
| HAVCR1  | Hepatitis A Virus Cellular Receptor 1               | Protein Coding | 50 | GC05M157028 | 2.349440813 | <a href="https://www.genecards.org/cgi-bin/carddisp.pl?gene=HAVCR1">https://www.genecards.org/cgi-bin/carddisp.pl?gene=HAVCR1</a>   |
| OR51E2  | Olfactory Receptor Family 51 Subfamily E Member 2   | Protein Coding | 38 | GC11M004680 | 2.346513271 | <a href="https://www.genecards.org/cgi-bin/carddisp.pl?gene=OR51E2">https://www.genecards.org/cgi-bin/carddisp.pl?gene=OR51E2</a>   |
| CA14    | Carbonic Anhydrase 14                               | Protein Coding | 50 | GC01P150436 | 2.342910767 | <a href="https://www.genecards.org/cgi-bin/carddisp.pl?gene=CA14">https://www.genecards.org/cgi-bin/carddisp.pl?gene=CA14</a>       |
| BCL2L11 | BCL2 Like 11                                        | Protein Coding | 52 | GC02P111119 | 2.341534853 | <a href="https://www.genecards.org/cgi-bin/carddisp.pl?gene=BCL2L11">https://www.genecards.org/cgi-bin/carddisp.pl?gene=BCL2L11</a> |
| IRF5    | Interferon Regulatory Factor 5                      | Protein Coding | 53 | GC07P128937 | 2.339133978 | <a href="https://www.genecards.org/cgi-bin/carddisp.pl?gene=IRF5">https://www.genecards.org/cgi-bin/carddisp.pl?gene=IRF5</a>       |
| GPRC6A  | G Protein-Coupled Receptor Class C Group 6 Member A | Protein Coding | 44 | GC06M116793 | 2.336325645 | <a href="https://www.genecards.org/cgi-bin/carddisp.pl?gene=GPRC6A">https://www.genecards.org/cgi-bin/carddisp.pl?gene=GPRC6A</a>   |
| S1PR1   | Sphingosine-1-Phosphate Receptor 1                  | Protein Coding | 52 | GC01P101236 | 2.336192608 | <a href="https://www.genecards.org/cgi-bin/carddisp.pl?gene=S1PR1">https://www.genecards.org/cgi-bin/carddisp.pl?gene=S1PR1</a>     |
| H2AX    | H2A.X Variant Histone                               | Protein Coding | 50 | GC11M119285 | 2.332493782 | <a href="https://www.genecards.org/cgi-bin/carddisp.pl?gene=H2AX">https://www.genecards.org/cgi-bin/carddisp.pl?gene=H2AX</a>       |
| MITF    | Melanocyte Inducing Transcription Factor            | Protein Coding | 55 | GC03P069788 | 2.331109762 | <a href="https://www.genecards.org/cgi-bin/carddisp.pl?gene=MITF">https://www.genecards.org/cgi-bin/carddisp.pl?gene=MITF</a>       |

|           |                                                                  |                |    |             |             |                                                                                                                                         |
|-----------|------------------------------------------------------------------|----------------|----|-------------|-------------|-----------------------------------------------------------------------------------------------------------------------------------------|
| RGS2      | Regulator Of G Protein Signaling 2                               | Protein Coding | 48 | GC01P192809 | 2.330634117 | <a href="https://www.genecards.org/cgi-bin/carddisp.pl?gene=RGS2">https://www.genecards.org/cgi-bin/carddisp.pl?gene=RGS2</a>           |
| LPAR3     | Lysophosphatidic Acid Receptor 3                                 | Protein Coding | 50 | GC01M084811 | 2.325584888 | <a href="https://www.genecards.org/cgi-bin/carddisp.pl?gene=LPAR3">https://www.genecards.org/cgi-bin/carddisp.pl?gene=LPAR3</a>         |
| TGFB3     | Transforming Growth Factor Beta 3                                | Protein Coding | 54 | GC14M075958 | 2.324998617 | <a href="https://www.genecards.org/cgi-bin/carddisp.pl?gene=TGFB3">https://www.genecards.org/cgi-bin/carddisp.pl?gene=TGFB3</a>         |
| PTP4A2    | Protein Tyrosine Phosphatase 4A2                                 | Protein Coding | 48 | GC01M031910 | 2.324296236 | <a href="https://www.genecards.org/cgi-bin/carddisp.pl?gene=PTP4A2">https://www.genecards.org/cgi-bin/carddisp.pl?gene=PTP4A2</a>       |
| TNFRSF10B | TNF Receptor Superfamily Member 10b                              | Protein Coding | 57 | GC08M023020 | 2.323630333 | <a href="https://www.genecards.org/cgi-bin/carddisp.pl?gene=TNFRSF10B">https://www.genecards.org/cgi-bin/carddisp.pl?gene=TNFRSF10B</a> |
| SLC15A2   | Solute Carrier Family 15 Member 2                                | Protein Coding | 47 | GC03P121894 | 2.316164017 | <a href="https://www.genecards.org/cgi-bin/carddisp.pl?gene=SLC15A2">https://www.genecards.org/cgi-bin/carddisp.pl?gene=SLC15A2</a>     |
| CLEC7A    | C-Type Lectin Domain Containing 7A                               | Protein Coding | 52 | GC12M022628 | 2.315096617 | <a href="https://www.genecards.org/cgi-bin/carddisp.pl?gene=CLEC7A">https://www.genecards.org/cgi-bin/carddisp.pl?gene=CLEC7A</a>       |
| OXSM      | 3-Oxoacyl-ACP Synthase, Mitochondrial                            | Protein Coding | 44 | GC03P025782 | 2.312613249 | <a href="https://www.genecards.org/cgi-bin/carddisp.pl?gene=OXSM">https://www.genecards.org/cgi-bin/carddisp.pl?gene=OXSM</a>           |
| GNRHR     | Gonadotropin Releasing Hormone Receptor                          | Protein Coding | 54 | GC04M067737 | 2.305584192 | <a href="https://www.genecards.org/cgi-bin/carddisp.pl?gene=GNRHR">https://www.genecards.org/cgi-bin/carddisp.pl?gene=GNRHR</a>         |
| PTPRD     | Protein Tyrosine Phosphatase Receptor Type D                     | Protein Coding | 52 | GC09M008307 | 2.301552773 | <a href="https://www.genecards.org/cgi-bin/carddisp.pl?gene=PTPRD">https://www.genecards.org/cgi-bin/carddisp.pl?gene=PTPRD</a>         |
| NPHS2     | NPHS2 Stomatin Family Member, Podocin                            | Protein Coding | 50 | GC01M179554 | 2.300552607 | <a href="https://www.genecards.org/cgi-bin/carddisp.pl?gene=NPHS2">https://www.genecards.org/cgi-bin/carddisp.pl?gene=NPHS2</a>         |
| SLC9A3R1  | SLC9A3 Regulator 1                                               | Protein Coding | 52 | GC17P074749 | 2.29944706  | <a href="https://www.genecards.org/cgi-bin/carddisp.pl?gene=SLC9A3R1">https://www.genecards.org/cgi-bin/carddisp.pl?gene=SLC9A3R1</a>   |
| KRT1      | Keratin 1                                                        | Protein Coding | 53 | GC12M052674 | 2.297845602 | <a href="https://www.genecards.org/cgi-bin/carddisp.pl?gene=KRT1">https://www.genecards.org/cgi-bin/carddisp.pl?gene=KRT1</a>           |
| EWSR1     | EWS RNA Binding Protein 1                                        | Protein Coding | 51 | GC22P044790 | 2.296663523 | <a href="https://www.genecards.org/cgi-bin/carddisp.pl?gene=EWSR1">https://www.genecards.org/cgi-bin/carddisp.pl?gene=EWSR1</a>         |
| SMG1      | SMG1 Nonsense Mediated MRNA Decay Associated PI3K Related Kinase | Protein Coding | 46 | GC16M019413 | 2.292959452 | <a href="https://www.genecards.org/cgi-bin/carddisp.pl?gene=SMG1">https://www.genecards.org/cgi-bin/carddisp.pl?gene=SMG1</a>           |

|         |                                                           |                |    |             |             |                                                                                                                                     |
|---------|-----------------------------------------------------------|----------------|----|-------------|-------------|-------------------------------------------------------------------------------------------------------------------------------------|
| CAMK2A  | Calcium/Calmodulin Dependent Protein Kinase II Alpha      | Protein Coding | 59 | GC05M150219 | 2.292059183 | <a href="https://www.genecards.org/cgi-bin/carddisp.pl?gene=CAMK2A">https://www.genecards.org/cgi-bin/carddisp.pl?gene=CAMK2A</a>   |
| CHRNA7  | Cholinergic Receptor Nicotinic Alpha 7 Subunit            | Protein Coding | 52 | GC15P031923 | 2.290010691 | <a href="https://www.genecards.org/cgi-bin/carddisp.pl?gene=CHRNA7">https://www.genecards.org/cgi-bin/carddisp.pl?gene=CHRNA7</a>   |
| RAP1A   | RAP1A, Member Of RAS Oncogene Family                      | Protein Coding | 51 | GC01P111542 | 2.289759874 | <a href="https://www.genecards.org/cgi-bin/carddisp.pl?gene=RAP1A">https://www.genecards.org/cgi-bin/carddisp.pl?gene=RAP1A</a>     |
| EIF2AK2 | Eukaryotic Translation Initiation Factor 2 Alpha Kinase 2 | Protein Coding | 56 | GC02M037099 | 2.28935051  | <a href="https://www.genecards.org/cgi-bin/carddisp.pl?gene=EIF2AK2">https://www.genecards.org/cgi-bin/carddisp.pl?gene=EIF2AK2</a> |
| IGHG1   | Immunoglobulin Heavy Constant Gamma 1 (G1m Marker)        | Protein Coding | 40 | GC14M105736 | 2.288361549 | <a href="https://www.genecards.org/cgi-bin/carddisp.pl?gene=IGHG1">https://www.genecards.org/cgi-bin/carddisp.pl?gene=IGHG1</a>     |
| PKN2    | Protein Kinase N2                                         | Protein Coding | 52 | GC01P088684 | 2.288004875 | <a href="https://www.genecards.org/cgi-bin/carddisp.pl?gene=PKN2">https://www.genecards.org/cgi-bin/carddisp.pl?gene=PKN2</a>       |
| KRT17   | Keratin 17                                                | Protein Coding | 51 | GC17M041619 | 2.285661221 | <a href="https://www.genecards.org/cgi-bin/carddisp.pl?gene=KRT17">https://www.genecards.org/cgi-bin/carddisp.pl?gene=KRT17</a>     |
| PKN1    | Protein Kinase N1                                         | Protein Coding | 56 | GC19P014433 | 2.285643816 | <a href="https://www.genecards.org/cgi-bin/carddisp.pl?gene=PKN1">https://www.genecards.org/cgi-bin/carddisp.pl?gene=PKN1</a>       |
| TTL     | Tubulin Tyrosine Ligase                                   | Protein Coding | 46 | GC02P123790 | 2.280835867 | <a href="https://www.genecards.org/cgi-bin/carddisp.pl?gene=TTL">https://www.genecards.org/cgi-bin/carddisp.pl?gene=TTL</a>         |
| GSTT2   | Glutathione S-Transferase Theta 2 (Gene/Pseudogene)       | Protein Coding | 40 | GC22P023980 | 2.280731201 | <a href="https://www.genecards.org/cgi-bin/carddisp.pl?gene=GSTT2">https://www.genecards.org/cgi-bin/carddisp.pl?gene=GSTT2</a>     |
| NPPC    | Natriuretic Peptide C                                     | Protein Coding | 48 | GC02M231921 | 2.280587196 | <a href="https://www.genecards.org/cgi-bin/carddisp.pl?gene=NPPC">https://www.genecards.org/cgi-bin/carddisp.pl?gene=NPPC</a>       |
| CR2     | Complement C3d Receptor 2                                 | Protein Coding | 53 | GC01P207454 | 2.280513048 | <a href="https://www.genecards.org/cgi-bin/carddisp.pl?gene=CR2">https://www.genecards.org/cgi-bin/carddisp.pl?gene=CR2</a>         |
| TUBB3   | Tubulin Beta 3 Class III                                  | Protein Coding | 55 | GC16P091607 | 2.279607296 | <a href="https://www.genecards.org/cgi-bin/carddisp.pl?gene=TUBB3">https://www.genecards.org/cgi-bin/carddisp.pl?gene=TUBB3</a>     |
| PHOX2B  | Paired Like Homeobox 2B                                   | Protein Coding | 51 | GC04M041746 | 2.278419018 | <a href="https://www.genecards.org/cgi-bin/carddisp.pl?gene=PHOX2B">https://www.genecards.org/cgi-bin/carddisp.pl?gene=PHOX2B</a>   |
| VEGF    | VEGF Nerve Growth Factor Inducible                        | Protein Coding | 45 | GC07M101162 | 2.278366566 | <a href="https://www.genecards.org/cgi-bin/carddisp.pl?gene=VEGF">https://www.genecards.org/cgi-bin/carddisp.pl?gene=VEGF</a>       |

|          |                                                        |                |    |             |             |                                                                                                                                       |
|----------|--------------------------------------------------------|----------------|----|-------------|-------------|---------------------------------------------------------------------------------------------------------------------------------------|
| SERPINH1 | Serpin Family H Member 1                               | Protein Coding | 53 | GC11P075562 | 2.277401924 | <a href="https://www.genecards.org/cgi-bin/carddisp.pl?gene=SERPINH1">https://www.genecards.org/cgi-bin/carddisp.pl?gene=SERPINH1</a> |
| GYPB     | Glycophorin B (MNS Blood Group)                        | Protein Coding | 43 | GC04M143996 | 2.275601149 | <a href="https://www.genecards.org/cgi-bin/carddisp.pl?gene=GYPB">https://www.genecards.org/cgi-bin/carddisp.pl?gene=GYPB</a>         |
| WNT1     | Wnt Family Member 1                                    | Protein Coding | 52 | GC12P049566 | 2.275330067 | <a href="https://www.genecards.org/cgi-bin/carddisp.pl?gene=WNT1">https://www.genecards.org/cgi-bin/carddisp.pl?gene=WNT1</a>         |
| PTGER2   | Prostaglandin E Receptor 2                             | Protein Coding | 55 | GC14P052314 | 2.275265217 | <a href="https://www.genecards.org/cgi-bin/carddisp.pl?gene=PTGER2">https://www.genecards.org/cgi-bin/carddisp.pl?gene=PTGER2</a>     |
| JUNB     | JunB Proto-Oncogene, AP-1 Transcription Factor Subunit | Protein Coding | 48 | GC19P012791 | 2.274892807 | <a href="https://www.genecards.org/cgi-bin/carddisp.pl?gene=JUNB">https://www.genecards.org/cgi-bin/carddisp.pl?gene=JUNB</a>         |
| CTNND1   | Catenin Delta 1                                        | Protein Coding | 52 | GC11P058206 | 2.270763636 | <a href="https://www.genecards.org/cgi-bin/carddisp.pl?gene=CTNND1">https://www.genecards.org/cgi-bin/carddisp.pl?gene=CTNND1</a>     |
| VNN2     | Vanin 2                                                | Protein Coding | 48 | GC06M132743 | 2.269202709 | <a href="https://www.genecards.org/cgi-bin/carddisp.pl?gene=VNN2">https://www.genecards.org/cgi-bin/carddisp.pl?gene=VNN2</a>         |
| KAT2A    | Lysine Acetyltransferase 2A                            | Protein Coding | 55 | GC17M042113 | 2.268852472 | <a href="https://www.genecards.org/cgi-bin/carddisp.pl?gene=KAT2A">https://www.genecards.org/cgi-bin/carddisp.pl?gene=KAT2A</a>       |
| MST1R    | Macrophage Stimulating 1 Receptor                      | Protein Coding | 56 | GC03M051598 | 2.268038988 | <a href="https://www.genecards.org/cgi-bin/carddisp.pl?gene=MST1R">https://www.genecards.org/cgi-bin/carddisp.pl?gene=MST1R</a>       |
| SRF      | Serum Response Factor                                  | Protein Coding | 50 | GC06P043171 | 2.267645597 | <a href="https://www.genecards.org/cgi-bin/carddisp.pl?gene=SRF">https://www.genecards.org/cgi-bin/carddisp.pl?gene=SRF</a>           |
| GLCCI1   | Glucocorticoid Induced 1                               | Protein Coding | 43 | GC07P007974 | 2.263047218 | <a href="https://www.genecards.org/cgi-bin/carddisp.pl?gene=GLCCI1">https://www.genecards.org/cgi-bin/carddisp.pl?gene=GLCCI1</a>     |
| RPL3     | Ribosomal Protein L3                                   | Protein Coding | 48 | GC22M061482 | 2.262486219 | <a href="https://www.genecards.org/cgi-bin/carddisp.pl?gene=RPL3">https://www.genecards.org/cgi-bin/carddisp.pl?gene=RPL3</a>         |
| CHEK1    | Checkpoint Kinase 1                                    | Protein Coding | 56 | GC11P125625 | 2.262406826 | <a href="https://www.genecards.org/cgi-bin/carddisp.pl?gene=CHEK1">https://www.genecards.org/cgi-bin/carddisp.pl?gene=CHEK1</a>       |
| NPY2R    | Neuropeptide Y Receptor Y2                             | Protein Coding | 51 | GC04P155173 | 2.261928558 | <a href="https://www.genecards.org/cgi-bin/carddisp.pl?gene=NPY2R">https://www.genecards.org/cgi-bin/carddisp.pl?gene=NPY2R</a>       |
| SSTR2    | Somatostatin Receptor 2                                | Protein Coding | 53 | GC17P073165 | 2.258113146 | <a href="https://www.genecards.org/cgi-bin/carddisp.pl?gene=SSTR2">https://www.genecards.org/cgi-bin/carddisp.pl?gene=SSTR2</a>       |

|         |                                        |                |    |             |             |                                                                                                                                     |
|---------|----------------------------------------|----------------|----|-------------|-------------|-------------------------------------------------------------------------------------------------------------------------------------|
| EPX     | Eosinophil Peroxidase                  | Protein Coding | 50 | GC17P058192 | 2.257993698 | <a href="https://www.genecards.org/cgi-bin/carddisp.pl?gene=EPX">https://www.genecards.org/cgi-bin/carddisp.pl?gene=EPX</a>         |
| CALCR   | Calcitonin Receptor                    | Protein Coding | 55 | GC07M093424 | 2.256989479 | <a href="https://www.genecards.org/cgi-bin/carddisp.pl?gene=CALCR">https://www.genecards.org/cgi-bin/carddisp.pl?gene=CALCR</a>     |
| CD33    | CD33 Molecule                          | Protein Coding | 52 | GC19P073323 | 2.256884336 | <a href="https://www.genecards.org/cgi-bin/carddisp.pl?gene=CD33">https://www.genecards.org/cgi-bin/carddisp.pl?gene=CD33</a>       |
| PLA2G2D | Phospholipase A2 Group IID             | Protein Coding | 49 | GC01M020111 | 2.250037909 | <a href="https://www.genecards.org/cgi-bin/carddisp.pl?gene=PLA2G2D">https://www.genecards.org/cgi-bin/carddisp.pl?gene=PLA2G2D</a> |
| KRT4    | Keratin 4                              | Protein Coding | 48 | GC12M052806 | 2.247910023 | <a href="https://www.genecards.org/cgi-bin/carddisp.pl?gene=KRT4">https://www.genecards.org/cgi-bin/carddisp.pl?gene=KRT4</a>       |
| NCF2    | Neutrophil Cytosolic Factor 2          | Protein Coding | 54 | GC01M184057 | 2.243585348 | <a href="https://www.genecards.org/cgi-bin/carddisp.pl?gene=NCF2">https://www.genecards.org/cgi-bin/carddisp.pl?gene=NCF2</a>       |
| TRB     | T Cell Receptor Beta Locus             | Protein Coding | 25 | GC07P150792 | 2.242851019 | <a href="https://www.genecards.org/cgi-bin/carddisp.pl?gene=TRB">https://www.genecards.org/cgi-bin/carddisp.pl?gene=TRB</a>         |
| GRM2    | Glutamate Metabotropic Receptor 2      | Protein Coding | 52 | GC03P051707 | 2.236067772 | <a href="https://www.genecards.org/cgi-bin/carddisp.pl?gene=GRM2">https://www.genecards.org/cgi-bin/carddisp.pl?gene=GRM2</a>       |
| AXL     | AXL Receptor Tyrosine Kinase           | Protein Coding | 59 | GC19P041219 | 2.235015631 | <a href="https://www.genecards.org/cgi-bin/carddisp.pl?gene=AXL">https://www.genecards.org/cgi-bin/carddisp.pl?gene=AXL</a>         |
| FLT4    | Fms Related Receptor Tyrosine Kinase 4 | Protein Coding | 59 | GC05M180644 | 2.23460269  | <a href="https://www.genecards.org/cgi-bin/carddisp.pl?gene=FLT4">https://www.genecards.org/cgi-bin/carddisp.pl?gene=FLT4</a>       |
| RASA1   | RAS P21 Protein Activator 1            | Protein Coding | 52 | GC05P087267 | 2.232948542 | <a href="https://www.genecards.org/cgi-bin/carddisp.pl?gene=RASA1">https://www.genecards.org/cgi-bin/carddisp.pl?gene=RASA1</a>     |
| NOP2    | NOP2 Nucleolar Protein                 | Protein Coding | 44 | GC12M006556 | 2.232879877 | <a href="https://www.genecards.org/cgi-bin/carddisp.pl?gene=NOP2">https://www.genecards.org/cgi-bin/carddisp.pl?gene=NOP2</a>       |
| ANXA6   | Annexin A6                             | Protein Coding | 49 | GC05M151100 | 2.230432749 | <a href="https://www.genecards.org/cgi-bin/carddisp.pl?gene=ANXA6">https://www.genecards.org/cgi-bin/carddisp.pl?gene=ANXA6</a>     |
| CD14    | CD14 Molecule                          | Protein Coding | 53 | GC05M140631 | 2.229529858 | <a href="https://www.genecards.org/cgi-bin/carddisp.pl?gene=CD14">https://www.genecards.org/cgi-bin/carddisp.pl?gene=CD14</a>       |
| SLC18A1 | Solute Carrier Family 18 Member A1     | Protein Coding | 49 | GC08M020144 | 2.224712849 | <a href="https://www.genecards.org/cgi-bin/carddisp.pl?gene=SLC18A1">https://www.genecards.org/cgi-bin/carddisp.pl?gene=SLC18A1</a> |

|         |                                                  |                |    |             |             |                                                                                                                                     |
|---------|--------------------------------------------------|----------------|----|-------------|-------------|-------------------------------------------------------------------------------------------------------------------------------------|
| PCM1    | Pericentriolar Material 1                        | Protein Coding | 48 | GC08P017922 | 2.223807573 | <a href="https://www.genecards.org/cgi-bin/carddisp.pl?gene=PCM1">https://www.genecards.org/cgi-bin/carddisp.pl?gene=PCM1</a>       |
| TSLP    | Thymic Stromal Lymphopoietin                     | Protein Coding | 46 | GC05P111070 | 2.220189095 | <a href="https://www.genecards.org/cgi-bin/carddisp.pl?gene=TSLP">https://www.genecards.org/cgi-bin/carddisp.pl?gene=TSLP</a>       |
| ITGAV   | Integrin Subunit Alpha V                         | Protein Coding | 55 | GC02P186589 | 2.220042944 | <a href="https://www.genecards.org/cgi-bin/carddisp.pl?gene=ITGAV">https://www.genecards.org/cgi-bin/carddisp.pl?gene=ITGAV</a>     |
| CASP7   | Caspase 7                                        | Protein Coding | 56 | GC10P113679 | 2.215365887 | <a href="https://www.genecards.org/cgi-bin/carddisp.pl?gene=CASP7">https://www.genecards.org/cgi-bin/carddisp.pl?gene=CASP7</a>     |
| RRAS2   | RAS Related 2                                    | Protein Coding | 55 | GC11M014299 | 2.213180065 | <a href="https://www.genecards.org/cgi-bin/carddisp.pl?gene=RRAS2">https://www.genecards.org/cgi-bin/carddisp.pl?gene=RRAS2</a>     |
| CANT1   | Calcium Activated Nucleotidase 1                 | Protein Coding | 51 | GC17M078992 | 2.212469816 | <a href="https://www.genecards.org/cgi-bin/carddisp.pl?gene=CANT1">https://www.genecards.org/cgi-bin/carddisp.pl?gene=CANT1</a>     |
| FGF9    | Fibroblast Growth Factor 9                       | Protein Coding | 51 | GC13P021671 | 2.206700563 | <a href="https://www.genecards.org/cgi-bin/carddisp.pl?gene=FGF9">https://www.genecards.org/cgi-bin/carddisp.pl?gene=FGF9</a>       |
| NECTIN2 | Nectin Cell Adhesion Molecule 2                  | Protein Coding | 51 | GC19P073053 | 2.205529928 | <a href="https://www.genecards.org/cgi-bin/carddisp.pl?gene=NECTIN2">https://www.genecards.org/cgi-bin/carddisp.pl?gene=NECTIN2</a> |
| P2RY2   | Purinergic Receptor P2Y2                         | Protein Coding | 51 | GC11P073202 | 2.203983545 | <a href="https://www.genecards.org/cgi-bin/carddisp.pl?gene=P2RY2">https://www.genecards.org/cgi-bin/carddisp.pl?gene=P2RY2</a>     |
| SLC5A12 | Solute Carrier Family 5 Member 12                | Protein Coding | 43 | GC11M026648 | 2.202407837 | <a href="https://www.genecards.org/cgi-bin/carddisp.pl?gene=SLC5A12">https://www.genecards.org/cgi-bin/carddisp.pl?gene=SLC5A12</a> |
| MTA1    | Metastasis Associated 1                          | Protein Coding | 50 | GC14P105419 | 2.200025558 | <a href="https://www.genecards.org/cgi-bin/carddisp.pl?gene=MTA1">https://www.genecards.org/cgi-bin/carddisp.pl?gene=MTA1</a>       |
| CD247   | CD247 Molecule                                   | Protein Coding | 56 | GC01M167399 | 2.198839188 | <a href="https://www.genecards.org/cgi-bin/carddisp.pl?gene=CD247">https://www.genecards.org/cgi-bin/carddisp.pl?gene=CD247</a>     |
| CXCL1   | C-X-C Motif Chemokine Ligand 1                   | Protein Coding | 50 | GC04P073869 | 2.19849968  | <a href="https://www.genecards.org/cgi-bin/carddisp.pl?gene=CXCL1">https://www.genecards.org/cgi-bin/carddisp.pl?gene=CXCL1</a>     |
| AP2B1   | Adaptor Related Protein Complex 2 Subunit Beta 1 | Protein Coding | 49 | GC17P035578 | 2.197745085 | <a href="https://www.genecards.org/cgi-bin/carddisp.pl?gene=AP2B1">https://www.genecards.org/cgi-bin/carddisp.pl?gene=AP2B1</a>     |
| PALLD   | Palladin, Cytoskeletal Associated Protein        | Protein Coding | 49 | GC04P168497 | 2.195952415 | <a href="https://www.genecards.org/cgi-bin/carddisp.pl?gene=PALLD">https://www.genecards.org/cgi-bin/carddisp.pl?gene=PALLD</a>     |

|          |                                                              |                |    |             |             |                                                                                                                                       |
|----------|--------------------------------------------------------------|----------------|----|-------------|-------------|---------------------------------------------------------------------------------------------------------------------------------------|
| KCNJ6    | Potassium Inwardly Rectifying Channel Subfamily J Member 6   | Protein Coding | 53 | GC21M037607 | 2.194558859 | <a href="https://www.genecards.org/cgi-bin/carddisp.pl?gene=KCNJ6">https://www.genecards.org/cgi-bin/carddisp.pl?gene=KCNJ6</a>       |
| PXN      | Paxillin                                                     | Protein Coding | 52 | GC12M120210 | 2.194096565 | <a href="https://www.genecards.org/cgi-bin/carddisp.pl?gene=PXN">https://www.genecards.org/cgi-bin/carddisp.pl?gene=PXN</a>           |
| FGF1     | Fibroblast Growth Factor 1                                   | Protein Coding | 54 | GC05M142555 | 2.19223547  | <a href="https://www.genecards.org/cgi-bin/carddisp.pl?gene=FGF1">https://www.genecards.org/cgi-bin/carddisp.pl?gene=FGF1</a>         |
| TOR1A    | Torsin Family 1 Member A                                     | Protein Coding | 52 | GC09M129812 | 2.189523697 | <a href="https://www.genecards.org/cgi-bin/carddisp.pl?gene=TOR1A">https://www.genecards.org/cgi-bin/carddisp.pl?gene=TOR1A</a>       |
| IFNAR2   | Interferon Alpha And Beta Receptor Subunit 2                 | Protein Coding | 56 | GC21P033229 | 2.188015223 | <a href="https://www.genecards.org/cgi-bin/carddisp.pl?gene=IFNAR2">https://www.genecards.org/cgi-bin/carddisp.pl?gene=IFNAR2</a>     |
| LORICRIN | Loricrin Cornified Envelope Precursor Protein                | Protein Coding | 41 | GC01P153262 | 2.187447548 | <a href="https://www.genecards.org/cgi-bin/carddisp.pl?gene=LORICRIN">https://www.genecards.org/cgi-bin/carddisp.pl?gene=LORICRIN</a> |
| UGT2A1   | UDP Glucuronosyltransferase Family 2 Member A1 Complex Locus | Protein Coding | 39 | GC04M069588 | 2.187245607 | <a href="https://www.genecards.org/cgi-bin/carddisp.pl?gene=UGT2A1">https://www.genecards.org/cgi-bin/carddisp.pl?gene=UGT2A1</a>     |
| DNAJA3   | DnaJ Heat Shock Protein Family (Hsp40) Member A3             | Protein Coding | 47 | GC16P004425 | 2.186523199 | <a href="https://www.genecards.org/cgi-bin/carddisp.pl?gene=DNAJA3">https://www.genecards.org/cgi-bin/carddisp.pl?gene=DNAJA3</a>     |
| NPHP1    | Nephrocystin 1                                               | Protein Coding | 50 | GC02M110122 | 2.185429335 | <a href="https://www.genecards.org/cgi-bin/carddisp.pl?gene=NPHP1">https://www.genecards.org/cgi-bin/carddisp.pl?gene=NPHP1</a>       |
| ELK1     | ETS Transcription Factor ELK1                                | Protein Coding | 50 | GC0XM047635 | 2.183863878 | <a href="https://www.genecards.org/cgi-bin/carddisp.pl?gene=ELK1">https://www.genecards.org/cgi-bin/carddisp.pl?gene=ELK1</a>         |
| GAS6     | Growth Arrest Specific 6                                     | Protein Coding | 51 | GC13M113820 | 2.181773901 | <a href="https://www.genecards.org/cgi-bin/carddisp.pl?gene=GAS6">https://www.genecards.org/cgi-bin/carddisp.pl?gene=GAS6</a>         |
| RPL8     | Ribosomal Protein L8                                         | Protein Coding | 47 | GC08M145667 | 2.181601048 | <a href="https://www.genecards.org/cgi-bin/carddisp.pl?gene=RPL8">https://www.genecards.org/cgi-bin/carddisp.pl?gene=RPL8</a>         |
| NBAS     | NBAS Subunit Of NRZ Tethering Complex                        | Protein Coding | 47 | GC02M014791 | 2.18016696  | <a href="https://www.genecards.org/cgi-bin/carddisp.pl?gene=NBAS">https://www.genecards.org/cgi-bin/carddisp.pl?gene=NBAS</a>         |
| HARS2    | Histidyl-TRNA Synthetase 2, Mitochondrial                    | Protein Coding | 51 | GC05P146979 | 2.180040359 | <a href="https://www.genecards.org/cgi-bin/carddisp.pl?gene=HARS2">https://www.genecards.org/cgi-bin/carddisp.pl?gene=HARS2</a>       |
| TIAM1    | TIAM Rac1 Associated GEF 1                                   | Protein Coding | 51 | GC21M031118 | 2.179636002 | <a href="https://www.genecards.org/cgi-bin/carddisp.pl?gene=TIAM1">https://www.genecards.org/cgi-bin/carddisp.pl?gene=TIAM1</a>       |

|        |                                       |                |    |             |             |                                                                                                                                   |
|--------|---------------------------------------|----------------|----|-------------|-------------|-----------------------------------------------------------------------------------------------------------------------------------|
| TRAF2  | TNF Receptor Associated Factor 2      | Protein Coding | 51 | GC09P136881 | 2.178793192 | <a href="https://www.genecards.org/cgi-bin/carddisp.pl?gene=TRAF2">https://www.genecards.org/cgi-bin/carddisp.pl?gene=TRAF2</a>   |
| RCAN1  | Regulator Of Calcineurin 1            | Protein Coding | 49 | GC21M034513 | 2.1757195   | <a href="https://www.genecards.org/cgi-bin/carddisp.pl?gene=RCAN1">https://www.genecards.org/cgi-bin/carddisp.pl?gene=RCAN1</a>   |
| TUBG1  | Tubulin Gamma 1                       | Protein Coding | 53 | GC17P042609 | 2.174733877 | <a href="https://www.genecards.org/cgi-bin/carddisp.pl?gene=TUBG1">https://www.genecards.org/cgi-bin/carddisp.pl?gene=TUBG1</a>   |
| LAP3   | Leucine Aminopeptidase 3              | Protein Coding | 48 | GC04P019261 | 2.167632818 | <a href="https://www.genecards.org/cgi-bin/carddisp.pl?gene=LAP3">https://www.genecards.org/cgi-bin/carddisp.pl?gene=LAP3</a>     |
| MMP12  | Matrix Metallopeptidase 12            | Protein Coding | 53 | GC11M102862 | 2.162835836 | <a href="https://www.genecards.org/cgi-bin/carddisp.pl?gene=MMP12">https://www.genecards.org/cgi-bin/carddisp.pl?gene=MMP12</a>   |
| APEH   | Acylaminoacyl-Peptide Hydrolase       | Protein Coding | 47 | GC03P049673 | 2.162119865 | <a href="https://www.genecards.org/cgi-bin/carddisp.pl?gene=APEH">https://www.genecards.org/cgi-bin/carddisp.pl?gene=APEH</a>     |
| MOGAT3 | Monoacylglycerol O-Acyltransferase 3  | Protein Coding | 38 | GC07M101192 | 2.160770655 | <a href="https://www.genecards.org/cgi-bin/carddisp.pl?gene=MOGAT3">https://www.genecards.org/cgi-bin/carddisp.pl?gene=MOGAT3</a> |
| POU2F2 | POU Class 2 Homeobox 2                | Protein Coding | 48 | GC19M042086 | 2.157357693 | <a href="https://www.genecards.org/cgi-bin/carddisp.pl?gene=POU2F2">https://www.genecards.org/cgi-bin/carddisp.pl?gene=POU2F2</a> |
| KDM4A  | Lysine Demethylase 4A                 | Protein Coding | 51 | GC01P043650 | 2.156814098 | <a href="https://www.genecards.org/cgi-bin/carddisp.pl?gene=KDM4A">https://www.genecards.org/cgi-bin/carddisp.pl?gene=KDM4A</a>   |
| CD86   | CD86 Molecule                         | Protein Coding | 51 | GC03P122055 | 2.156406641 | <a href="https://www.genecards.org/cgi-bin/carddisp.pl?gene=CD86">https://www.genecards.org/cgi-bin/carddisp.pl?gene=CD86</a>     |
| GRPR   | Gastrin Releasing Peptide Receptor    | Protein Coding | 50 | GC0XP016141 | 2.155606985 | <a href="https://www.genecards.org/cgi-bin/carddisp.pl?gene=GRPR">https://www.genecards.org/cgi-bin/carddisp.pl?gene=GRPR</a>     |
| CHRM2  | Cholinergic Receptor Muscarinic 2     | Protein Coding | 55 | GC07P136868 | 2.15210104  | <a href="https://www.genecards.org/cgi-bin/carddisp.pl?gene=CHRM2">https://www.genecards.org/cgi-bin/carddisp.pl?gene=CHRM2</a>   |
| MSRB1  | Methionine Sulfoxide Reductase B1     | Protein Coding | 45 | GC16M008078 | 2.151757956 | <a href="https://www.genecards.org/cgi-bin/carddisp.pl?gene=MSRB1">https://www.genecards.org/cgi-bin/carddisp.pl?gene=MSRB1</a>   |
| SSBP1  | Single Stranded DNA Binding Protein 1 | Protein Coding | 47 | GC07P150787 | 2.150444269 | <a href="https://www.genecards.org/cgi-bin/carddisp.pl?gene=SSBP1">https://www.genecards.org/cgi-bin/carddisp.pl?gene=SSBP1</a>   |
| CXCL5  | C-X-C Motif Chemokine Ligand 5        | Protein Coding | 47 | GC04M073995 | 2.147365332 | <a href="https://www.genecards.org/cgi-bin/carddisp.pl?gene=CXCL5">https://www.genecards.org/cgi-bin/carddisp.pl?gene=CXCL5</a>   |

|        |                                               |                |    |             |             |                                                                                                                                   |
|--------|-----------------------------------------------|----------------|----|-------------|-------------|-----------------------------------------------------------------------------------------------------------------------------------|
| PPP3CA | Protein Phosphatase 3 Catalytic Subunit Alpha | Protein Coding | 59 | GC04M101024 | 2.147106171 | <a href="https://www.genecards.org/cgi-bin/carddisp.pl?gene=PPP3CA">https://www.genecards.org/cgi-bin/carddisp.pl?gene=PPP3CA</a> |
| GUCA2B | Guanylate Cyclase Activator 2B                | Protein Coding | 44 | GC01P042153 | 2.145024538 | <a href="https://www.genecards.org/cgi-bin/carddisp.pl?gene=GUCA2B">https://www.genecards.org/cgi-bin/carddisp.pl?gene=GUCA2B</a> |
| MIP    | Major Intrinsic Protein Of Lens Fiber         | Protein Coding | 47 | GC12M056449 | 2.14080596  | <a href="https://www.genecards.org/cgi-bin/carddisp.pl?gene=MIP">https://www.genecards.org/cgi-bin/carddisp.pl?gene=MIP</a>       |
| GPR139 | G Protein-Coupled Receptor 139                | Protein Coding | 41 | GC16M020042 | 2.138799429 | <a href="https://www.genecards.org/cgi-bin/carddisp.pl?gene=GPR139">https://www.genecards.org/cgi-bin/carddisp.pl?gene=GPR139</a> |
| COX4I2 | Cytochrome C Oxidase Subunit 4I2              | Protein Coding | 47 | GC20P031637 | 2.136496305 | <a href="https://www.genecards.org/cgi-bin/carddisp.pl?gene=COX4I2">https://www.genecards.org/cgi-bin/carddisp.pl?gene=COX4I2</a> |
| ITGA4  | Integrin Subunit Alpha 4                      | Protein Coding | 55 | GC02P181456 | 2.135978699 | <a href="https://www.genecards.org/cgi-bin/carddisp.pl?gene=ITGA4">https://www.genecards.org/cgi-bin/carddisp.pl?gene=ITGA4</a>   |
| SLC5A3 | Solute Carrier Family 5 Member 3              | Protein Coding | 46 | GC21P034139 | 2.13568759  | <a href="https://www.genecards.org/cgi-bin/carddisp.pl?gene=SLC5A3">https://www.genecards.org/cgi-bin/carddisp.pl?gene=SLC5A3</a> |
| CXCL9  | C-X-C Motif Chemokine Ligand 9                | Protein Coding | 47 | GC04M076001 | 2.134976625 | <a href="https://www.genecards.org/cgi-bin/carddisp.pl?gene=CXCL9">https://www.genecards.org/cgi-bin/carddisp.pl?gene=CXCL9</a>   |
| EEF2K  | Eukaryotic Elongation Factor 2 Kinase         | Protein Coding | 53 | GC16P024508 | 2.13412714  | <a href="https://www.genecards.org/cgi-bin/carddisp.pl?gene=EEF2K">https://www.genecards.org/cgi-bin/carddisp.pl?gene=EEF2K</a>   |
| MMP7   | Matrix Metalloproteinase 7                    | Protein Coding | 53 | GC11M102425 | 2.130843878 | <a href="https://www.genecards.org/cgi-bin/carddisp.pl?gene=MMP7">https://www.genecards.org/cgi-bin/carddisp.pl?gene=MMP7</a>     |
| KAT2B  | Lysine Acetyltransferase 2B                   | Protein Coding | 55 | GC03P020043 | 2.130774498 | <a href="https://www.genecards.org/cgi-bin/carddisp.pl?gene=KAT2B">https://www.genecards.org/cgi-bin/carddisp.pl?gene=KAT2B</a>   |
| CDC25C | Cell Division Cycle 25C                       | Protein Coding | 54 | GC05M138285 | 2.12878871  | <a href="https://www.genecards.org/cgi-bin/carddisp.pl?gene=CDC25C">https://www.genecards.org/cgi-bin/carddisp.pl?gene=CDC25C</a> |
| UTRN   | Utrophin                                      | Protein Coding | 47 | GC06P144285 | 2.123741865 | <a href="https://www.genecards.org/cgi-bin/carddisp.pl?gene=UTRN">https://www.genecards.org/cgi-bin/carddisp.pl?gene=UTRN</a>     |
| TYRO3  | TYRO3 Protein Tyrosine Kinase                 | Protein Coding | 56 | GC15P041557 | 2.121773958 | <a href="https://www.genecards.org/cgi-bin/carddisp.pl?gene=TYRO3">https://www.genecards.org/cgi-bin/carddisp.pl?gene=TYRO3</a>   |
| MAP2K3 | Mitogen-Activated Protein Kinase Kinase 3     | Protein Coding | 55 | GC17P061212 | 2.121331215 | <a href="https://www.genecards.org/cgi-bin/carddisp.pl?gene=MAP2K3">https://www.genecards.org/cgi-bin/carddisp.pl?gene=MAP2K3</a> |

|        |                                               |                |    |             |             |                                                                                                                                   |
|--------|-----------------------------------------------|----------------|----|-------------|-------------|-----------------------------------------------------------------------------------------------------------------------------------|
| DPYSL2 | Dihydropyrimidinase Like 2                    | Protein Coding | 52 | GC08P026514 | 2.119753838 | <a href="https://www.genecards.org/cgi-bin/carddisp.pl?gene=DPYSL2">https://www.genecards.org/cgi-bin/carddisp.pl?gene=DPYSL2</a> |
| HDAC5  | Histone Deacetylase 5                         | Protein Coding | 56 | GC17M044076 | 2.118413448 | <a href="https://www.genecards.org/cgi-bin/carddisp.pl?gene=HDAC5">https://www.genecards.org/cgi-bin/carddisp.pl?gene=HDAC5</a>   |
| TPST2  | Tyrosylprotein Sulfotransferase 2             | Protein Coding | 47 | GC22M061183 | 2.113404989 | <a href="https://www.genecards.org/cgi-bin/carddisp.pl?gene=TPST2">https://www.genecards.org/cgi-bin/carddisp.pl?gene=TPST2</a>   |
| MERTK  | MER Proto-Oncogene, Tyrosine Kinase           | Protein Coding | 59 | GC02P111898 | 2.112577915 | <a href="https://www.genecards.org/cgi-bin/carddisp.pl?gene=MERTK">https://www.genecards.org/cgi-bin/carddisp.pl?gene=MERTK</a>   |
| NGB    | Neuroglobin                                   | Protein Coding | 43 | GC14M077265 | 2.111859798 | <a href="https://www.genecards.org/cgi-bin/carddisp.pl?gene=NGB">https://www.genecards.org/cgi-bin/carddisp.pl?gene=NGB</a>       |
| PTP4A1 | Protein Tyrosine Phosphatase 4A1              | Protein Coding | 47 | GC06P092552 | 2.11169529  | <a href="https://www.genecards.org/cgi-bin/carddisp.pl?gene=PTP4A1">https://www.genecards.org/cgi-bin/carddisp.pl?gene=PTP4A1</a> |
| GIT2   | GIT ArfGAP 2                                  | Protein Coding | 48 | GC12M109929 | 2.111174107 | <a href="https://www.genecards.org/cgi-bin/carddisp.pl?gene=GIT2">https://www.genecards.org/cgi-bin/carddisp.pl?gene=GIT2</a>     |
| SH2D1A | SH2 Domain Containing 1A                      | Protein Coding | 53 | GC0XP124227 | 2.110352278 | <a href="https://www.genecards.org/cgi-bin/carddisp.pl?gene=SH2D1A">https://www.genecards.org/cgi-bin/carddisp.pl?gene=SH2D1A</a> |
| SORBS1 | Sorbin And SH3 Domain Containing 1            | Protein Coding | 48 | GC10M095311 | 2.107699394 | <a href="https://www.genecards.org/cgi-bin/carddisp.pl?gene=SORBS1">https://www.genecards.org/cgi-bin/carddisp.pl?gene=SORBS1</a> |
| NR2E3  | Nuclear Receptor Subfamily 2 Group E Member 3 | Protein Coding | 48 | GC15P071792 | 2.107695341 | <a href="https://www.genecards.org/cgi-bin/carddisp.pl?gene=NR2E3">https://www.genecards.org/cgi-bin/carddisp.pl?gene=NR2E3</a>   |
| RNPC3  | RNA Binding Region (RNP1, RRM) Containing 3   | Protein Coding | 42 | GC01P103525 | 2.104146481 | <a href="https://www.genecards.org/cgi-bin/carddisp.pl?gene=RNPC3">https://www.genecards.org/cgi-bin/carddisp.pl?gene=RNPC3</a>   |
| PPT2   | Palmitoyl-Protein Thioesterase 2              | Protein Coding | 44 | GC06P032153 | 2.102693081 | <a href="https://www.genecards.org/cgi-bin/carddisp.pl?gene=PPT2">https://www.genecards.org/cgi-bin/carddisp.pl?gene=PPT2</a>     |
| EPHA3  | EPH Receptor A3                               | Protein Coding | 53 | GC03P089077 | 2.101714849 | <a href="https://www.genecards.org/cgi-bin/carddisp.pl?gene=EPHA3">https://www.genecards.org/cgi-bin/carddisp.pl?gene=EPHA3</a>   |
| CD69   | CD69 Molecule                                 | Protein Coding | 49 | GC12M022623 | 2.100873947 | <a href="https://www.genecards.org/cgi-bin/carddisp.pl?gene=CD69">https://www.genecards.org/cgi-bin/carddisp.pl?gene=CD69</a>     |
| NTRK3  | Neurotrophic Receptor Tyrosine Kinase 3       | Protein Coding | 59 | GC15M087859 | 2.100211382 | <a href="https://www.genecards.org/cgi-bin/carddisp.pl?gene=NTRK3">https://www.genecards.org/cgi-bin/carddisp.pl?gene=NTRK3</a>   |

|         |                                                    |                |    |             |             |                                                                                                                                     |
|---------|----------------------------------------------------|----------------|----|-------------|-------------|-------------------------------------------------------------------------------------------------------------------------------------|
| ARHGEF2 | Rho/Rac Guanine Nucleotide Exchange Factor 2       | Protein Coding | 52 | GC01M155946 | 2.094944477 | <a href="https://www.genecards.org/cgi-bin/carddisp.pl?gene=ARHGEF2">https://www.genecards.org/cgi-bin/carddisp.pl?gene=ARHGEF2</a> |
| TNFRSF9 | TNF Receptor Superfamily Member 9                  | Protein Coding | 50 | GC01M007915 | 2.094399691 | <a href="https://www.genecards.org/cgi-bin/carddisp.pl?gene=TNFRSF9">https://www.genecards.org/cgi-bin/carddisp.pl?gene=TNFRSF9</a> |
| BID     | BH3 Interacting Domain Death Agonist               | Protein Coding | 52 | GC22M017734 | 2.09288168  | <a href="https://www.genecards.org/cgi-bin/carddisp.pl?gene=BID">https://www.genecards.org/cgi-bin/carddisp.pl?gene=BID</a>         |
| RRAS    | RAS Related                                        | Protein Coding | 48 | GC19M049635 | 2.091985941 | <a href="https://www.genecards.org/cgi-bin/carddisp.pl?gene=RRAS">https://www.genecards.org/cgi-bin/carddisp.pl?gene=RRAS</a>       |
| ITGA6   | Integrin Subunit Alpha 6                           | Protein Coding | 56 | GC02P172427 | 2.089226961 | <a href="https://www.genecards.org/cgi-bin/carddisp.pl?gene=ITGA6">https://www.genecards.org/cgi-bin/carddisp.pl?gene=ITGA6</a>     |
| MTPN    | Myotrophin                                         | Protein Coding | 41 | GC07M135926 | 2.08886981  | <a href="https://www.genecards.org/cgi-bin/carddisp.pl?gene=MTPN">https://www.genecards.org/cgi-bin/carddisp.pl?gene=MTPN</a>       |
| HCK     | HCK Proto-Oncogene, Src Family Tyrosine Kinase     | Protein Coding | 54 | GC20P032052 | 2.088297129 | <a href="https://www.genecards.org/cgi-bin/carddisp.pl?gene=HCK">https://www.genecards.org/cgi-bin/carddisp.pl?gene=HCK</a>         |
| FKBP1A  | FKBP Prolyl Isomerase 1A                           | Protein Coding | 54 | GC20M001369 | 2.087401867 | <a href="https://www.genecards.org/cgi-bin/carddisp.pl?gene=FKBP1A">https://www.genecards.org/cgi-bin/carddisp.pl?gene=FKBP1A</a>   |
| SLC18A3 | Solute Carrier Family 18 Member A3                 | Protein Coding | 50 | GC10P049610 | 2.086946011 | <a href="https://www.genecards.org/cgi-bin/carddisp.pl?gene=SLC18A3">https://www.genecards.org/cgi-bin/carddisp.pl?gene=SLC18A3</a> |
| ADI1    | Acireductone Dioxygenase 1                         | Protein Coding | 46 | GC02M003501 | 2.086838961 | <a href="https://www.genecards.org/cgi-bin/carddisp.pl?gene=ADI1">https://www.genecards.org/cgi-bin/carddisp.pl?gene=ADI1</a>       |
| COL4A1  | Collagen Type IV Alpha 1 Chain                     | Protein Coding | 55 | GC13M110148 | 2.084783077 | <a href="https://www.genecards.org/cgi-bin/carddisp.pl?gene=COL4A1">https://www.genecards.org/cgi-bin/carddisp.pl?gene=COL4A1</a>   |
| MASP1   | MBL Associated Serine Protease 1                   | Protein Coding | 55 | GC03M187216 | 2.084374428 | <a href="https://www.genecards.org/cgi-bin/carddisp.pl?gene=MASP1">https://www.genecards.org/cgi-bin/carddisp.pl?gene=MASP1</a>     |
| ADORA2B | Adenosine A2b Receptor                             | Protein Coding | 55 | GC17P017963 | 2.084364653 | <a href="https://www.genecards.org/cgi-bin/carddisp.pl?gene=ADORA2B">https://www.genecards.org/cgi-bin/carddisp.pl?gene=ADORA2B</a> |
| DLG2    | Discs Large MAGUK Scaffold Protein 2               | Protein Coding | 48 | GC11M083455 | 2.081746817 | <a href="https://www.genecards.org/cgi-bin/carddisp.pl?gene=DLG2">https://www.genecards.org/cgi-bin/carddisp.pl?gene=DLG2</a>       |
| PRG2    | Proteoglycan 2, Pro Eosinophil Major Basic Protein | Protein Coding | 47 | GC11M057386 | 2.079038382 | <a href="https://www.genecards.org/cgi-bin/carddisp.pl?gene=PRG2">https://www.genecards.org/cgi-bin/carddisp.pl?gene=PRG2</a>       |

|          |                                                                       |                |    |             |             |                                                                                                                                       |
|----------|-----------------------------------------------------------------------|----------------|----|-------------|-------------|---------------------------------------------------------------------------------------------------------------------------------------|
| KHDRBS2  | KH RNA Binding Domain Containing, Signal Transduction Associated<br>2 | Protein Coding | 43 | GC06M061542 | 2.074846268 | <a href="https://www.genecards.org/cgi-bin/carddisp.pl?gene=KHDRBS2">https://www.genecards.org/cgi-bin/carddisp.pl?gene=KHDRBS2</a>   |
| FOXP2    | Forkhead Box P2                                                       | Protein Coding | 50 | GC07P114086 | 2.072494745 | <a href="https://www.genecards.org/cgi-bin/carddisp.pl?gene=FOXP2">https://www.genecards.org/cgi-bin/carddisp.pl?gene=FOXP2</a>       |
| POLK     | DNA Polymerase Kappa                                                  | Protein Coding | 49 | GC05P075511 | 2.071971893 | <a href="https://www.genecards.org/cgi-bin/carddisp.pl?gene=POLK">https://www.genecards.org/cgi-bin/carddisp.pl?gene=POLK</a>         |
| FCGR1A   | Fc Gamma Receptor Ia                                                  | Protein Coding | 48 | GC01P150388 | 2.06972146  | <a href="https://www.genecards.org/cgi-bin/carddisp.pl?gene=FCGR1A">https://www.genecards.org/cgi-bin/carddisp.pl?gene=FCGR1A</a>     |
| RPL23A   | Ribosomal Protein L23a                                                | Protein Coding | 47 | GC17P028719 | 2.064439297 | <a href="https://www.genecards.org/cgi-bin/carddisp.pl?gene=RPL23A">https://www.genecards.org/cgi-bin/carddisp.pl?gene=RPL23A</a>     |
| ATN1     | Atrophin 1                                                            | Protein Coding | 50 | GC12P023561 | 2.062030077 | <a href="https://www.genecards.org/cgi-bin/carddisp.pl?gene=ATN1">https://www.genecards.org/cgi-bin/carddisp.pl?gene=ATN1</a>         |
| SFTPA1   | Surfactant Protein A1                                                 | Protein Coding | 51 | GC10P095475 | 2.061035395 | <a href="https://www.genecards.org/cgi-bin/carddisp.pl?gene=SFTPA1">https://www.genecards.org/cgi-bin/carddisp.pl?gene=SFTPA1</a>     |
| CSF3R    | Colony Stimulating Factor 3 Receptor                                  | Protein Coding | 54 | GC01M036466 | 2.059127331 | <a href="https://www.genecards.org/cgi-bin/carddisp.pl?gene=CSF3R">https://www.genecards.org/cgi-bin/carddisp.pl?gene=CSF3R</a>       |
| MYO18A   | Myosin XVIIIa                                                         | Protein Coding | 44 | GC17M051199 | 2.057760477 | <a href="https://www.genecards.org/cgi-bin/carddisp.pl?gene=MYO18A">https://www.genecards.org/cgi-bin/carddisp.pl?gene=MYO18A</a>     |
| GP6      | Glycoprotein VI Platelet                                              | Protein Coding | 53 | GC19M055013 | 2.057397366 | <a href="https://www.genecards.org/cgi-bin/carddisp.pl?gene=GP6">https://www.genecards.org/cgi-bin/carddisp.pl?gene=GP6</a>           |
| HUWE1    | HECT, UBA And WWE Domain Containing E3 Ubiquitin Protein<br>Ligase 1  | Protein Coding | 52 | GC0XM053532 | 2.05684495  | <a href="https://www.genecards.org/cgi-bin/carddisp.pl?gene=HUWE1">https://www.genecards.org/cgi-bin/carddisp.pl?gene=HUWE1</a>       |
| SLC9A3R2 | SLC9A3 Regulator 2                                                    | Protein Coding | 45 | GC16P013511 | 2.05680871  | <a href="https://www.genecards.org/cgi-bin/carddisp.pl?gene=SLC9A3R2">https://www.genecards.org/cgi-bin/carddisp.pl?gene=SLC9A3R2</a> |
| NUDT1    | Nudix Hydrolase 1                                                     | Protein Coding | 48 | GC07P002242 | 2.056804657 | <a href="https://www.genecards.org/cgi-bin/carddisp.pl?gene=NUDT1">https://www.genecards.org/cgi-bin/carddisp.pl?gene=NUDT1</a>       |
| CCL3     | C-C Motif Chemokine Ligand 3                                          | Protein Coding | 46 | GC17M036088 | 2.054622173 | <a href="https://www.genecards.org/cgi-bin/carddisp.pl?gene=CCL3">https://www.genecards.org/cgi-bin/carddisp.pl?gene=CCL3</a>         |
| PSIP1    | PC4 And SRSF1 Interacting Protein 1                                   | Protein Coding | 47 | GC09M015464 | 2.052438974 | <a href="https://www.genecards.org/cgi-bin/carddisp.pl?gene=PSIP1">https://www.genecards.org/cgi-bin/carddisp.pl?gene=PSIP1</a>       |

|          |                                                                 |                |    |             |             |                                                                                                                                       |
|----------|-----------------------------------------------------------------|----------------|----|-------------|-------------|---------------------------------------------------------------------------------------------------------------------------------------|
| LMO2     | LIM Domain Only 2                                               | Protein Coding | 47 | GC11M033858 | 2.05214572  | <a href="https://www.genecards.org/cgi-bin/carddisp.pl?gene=LMO2">https://www.genecards.org/cgi-bin/carddisp.pl?gene=LMO2</a>         |
| PTPRF    | Protein Tyrosine Phosphatase Receptor Type F                    | Protein Coding | 56 | GC01P043527 | 2.049630642 | <a href="https://www.genecards.org/cgi-bin/carddisp.pl?gene=PTPRF">https://www.genecards.org/cgi-bin/carddisp.pl?gene=PTPRF</a>       |
| VEGFB    | Vascular Endothelial Growth Factor B                            | Protein Coding | 51 | GC11P064234 | 2.048155546 | <a href="https://www.genecards.org/cgi-bin/carddisp.pl?gene=VEGFB">https://www.genecards.org/cgi-bin/carddisp.pl?gene=VEGFB</a>       |
| CPA1     | Carboxypeptidase A1                                             | Protein Coding | 51 | GC07P130380 | 2.048068523 | <a href="https://www.genecards.org/cgi-bin/carddisp.pl?gene=CPA1">https://www.genecards.org/cgi-bin/carddisp.pl?gene=CPA1</a>         |
| SNAI2    | Snail Family Transcriptional Repressor 2                        | Protein Coding | 51 | GC08M048917 | 2.047676325 | <a href="https://www.genecards.org/cgi-bin/carddisp.pl?gene=SNAI2">https://www.genecards.org/cgi-bin/carddisp.pl?gene=SNAI2</a>       |
| CEACAM1  | CEA Cell Adhesion Molecule 1                                    | Protein Coding | 51 | GC19M042507 | 2.047606945 | <a href="https://www.genecards.org/cgi-bin/carddisp.pl?gene=CEACAM1">https://www.genecards.org/cgi-bin/carddisp.pl?gene=CEACAM1</a>   |
| TPST1    | Tyrosylprotein Sulfotransferase 1                               | Protein Coding | 47 | GC07P071715 | 2.046896458 | <a href="https://www.genecards.org/cgi-bin/carddisp.pl?gene=TPST1">https://www.genecards.org/cgi-bin/carddisp.pl?gene=TPST1</a>       |
| C3AR1    | Complement C3a Receptor 1                                       | Protein Coding | 50 | GC12M008059 | 2.04667449  | <a href="https://www.genecards.org/cgi-bin/carddisp.pl?gene=C3AR1">https://www.genecards.org/cgi-bin/carddisp.pl?gene=C3AR1</a>       |
| EIF6     | Eukaryotic Translation Initiation Factor 6                      | Protein Coding | 47 | GC20M035278 | 2.044235945 | <a href="https://www.genecards.org/cgi-bin/carddisp.pl?gene=EIF6">https://www.genecards.org/cgi-bin/carddisp.pl?gene=EIF6</a>         |
| SUMO1    | Small Ubiquitin Like Modifier 1                                 | Protein Coding | 53 | GC02M202206 | 2.042767763 | <a href="https://www.genecards.org/cgi-bin/carddisp.pl?gene=SUMO1">https://www.genecards.org/cgi-bin/carddisp.pl?gene=SUMO1</a>       |
| TIE1     | Tyrosine Kinase With Immunoglobulin Like And EGF Like Domains 1 | Protein Coding | 52 | GC01P043300 | 2.041883707 | <a href="https://www.genecards.org/cgi-bin/carddisp.pl?gene=TIE1">https://www.genecards.org/cgi-bin/carddisp.pl?gene=TIE1</a>         |
| CENPF    | Centromere Protein F                                            | Protein Coding | 48 | GC01P214603 | 2.041686535 | <a href="https://www.genecards.org/cgi-bin/carddisp.pl?gene=CENPF">https://www.genecards.org/cgi-bin/carddisp.pl?gene=CENPF</a>       |
| TNC      | Tenascin C                                                      | Protein Coding | 56 | GC09M115019 | 2.041381836 | <a href="https://www.genecards.org/cgi-bin/carddisp.pl?gene=TNC">https://www.genecards.org/cgi-bin/carddisp.pl?gene=TNC</a>           |
| SERPINB2 | Serpin Family B Member 2                                        | Protein Coding | 50 | GC18P063871 | 2.040825367 | <a href="https://www.genecards.org/cgi-bin/carddisp.pl?gene=SERPINB2">https://www.genecards.org/cgi-bin/carddisp.pl?gene=SERPINB2</a> |
| SLC47A1  | Solute Carrier Family 47 Member 1                               | Protein Coding | 48 | GC17P019495 | 2.040024042 | <a href="https://www.genecards.org/cgi-bin/carddisp.pl?gene=SLC47A1">https://www.genecards.org/cgi-bin/carddisp.pl?gene=SLC47A1</a>   |

|        |                                            |                |    |             |             |                                                                                                                                   |
|--------|--------------------------------------------|----------------|----|-------------|-------------|-----------------------------------------------------------------------------------------------------------------------------------|
| MCAM   | Melanoma Cell Adhesion Molecule            | Protein Coding | 49 | GC11M119308 | 2.03592515  | <a href="https://www.genecards.org/cgi-bin/carddisp.pl?gene=MCAM">https://www.genecards.org/cgi-bin/carddisp.pl?gene=MCAM</a>     |
| G3BP1  | G3BP Stress Granule Assembly Factor 1      | Protein Coding | 47 | GC05P151771 | 2.033505201 | <a href="https://www.genecards.org/cgi-bin/carddisp.pl?gene=G3BP1">https://www.genecards.org/cgi-bin/carddisp.pl?gene=G3BP1</a>   |
| OPRD1  | Opioid Receptor Delta 1                    | Protein Coding | 50 | GC01P028812 | 2.032579899 | <a href="https://www.genecards.org/cgi-bin/carddisp.pl?gene=OPRD1">https://www.genecards.org/cgi-bin/carddisp.pl?gene=OPRD1</a>   |
| KRT10  | Keratin 10                                 | Protein Coding | 50 | GC17M040818 | 2.029624939 | <a href="https://www.genecards.org/cgi-bin/carddisp.pl?gene=KRT10">https://www.genecards.org/cgi-bin/carddisp.pl?gene=KRT10</a>   |
| DNM3   | Dynamin 3                                  | Protein Coding | 50 | GC01P171868 | 2.028045177 | <a href="https://www.genecards.org/cgi-bin/carddisp.pl?gene=DNM3">https://www.genecards.org/cgi-bin/carddisp.pl?gene=DNM3</a>     |
| NOG    | Noggin                                     | Protein Coding | 53 | GC17P056593 | 2.026612282 | <a href="https://www.genecards.org/cgi-bin/carddisp.pl?gene=NOG">https://www.genecards.org/cgi-bin/carddisp.pl?gene=NOG</a>       |
| HIP1   | Huntingtin Interacting Protein 1           | Protein Coding | 47 | GC07M075533 | 2.025650978 | <a href="https://www.genecards.org/cgi-bin/carddisp.pl?gene=HIP1">https://www.genecards.org/cgi-bin/carddisp.pl?gene=HIP1</a>     |
| DMPK   | DM1 Protein Kinase                         | Protein Coding | 55 | GC19M045769 | 2.02176404  | <a href="https://www.genecards.org/cgi-bin/carddisp.pl?gene=DMPK">https://www.genecards.org/cgi-bin/carddisp.pl?gene=DMPK</a>     |
| MUSK   | Muscle Associated Receptor Tyrosine Kinase | Protein Coding | 55 | GC09P110668 | 2.02113533  | <a href="https://www.genecards.org/cgi-bin/carddisp.pl?gene=MUSK">https://www.genecards.org/cgi-bin/carddisp.pl?gene=MUSK</a>     |
| USP1   | Ubiquitin Specific Peptidase 1             | Protein Coding | 51 | GC01P062436 | 2.019223452 | <a href="https://www.genecards.org/cgi-bin/carddisp.pl?gene=USP1">https://www.genecards.org/cgi-bin/carddisp.pl?gene=USP1</a>     |
| CCNG1  | Cyclin G1                                  | Protein Coding | 47 | GC05P163438 | 2.017747879 | <a href="https://www.genecards.org/cgi-bin/carddisp.pl?gene=CCNG1">https://www.genecards.org/cgi-bin/carddisp.pl?gene=CCNG1</a>   |
| BLZF1  | Basic Leucine Zipper Nuclear Factor 1      | Protein Coding | 45 | GC01P169367 | 2.013850212 | <a href="https://www.genecards.org/cgi-bin/carddisp.pl?gene=BLZF1">https://www.genecards.org/cgi-bin/carddisp.pl?gene=BLZF1</a>   |
| MYOD1  | Myogenic Differentiation 1                 | Protein Coding | 53 | GC11P017741 | 2.008466005 | <a href="https://www.genecards.org/cgi-bin/carddisp.pl?gene=MYOD1">https://www.genecards.org/cgi-bin/carddisp.pl?gene=MYOD1</a>   |
| SLX9   | SLX9 Ribosome Biogenesis Factor            | Protein Coding | 35 | GC21P044939 | 2.005723715 | <a href="https://www.genecards.org/cgi-bin/carddisp.pl?gene=SLX9">https://www.genecards.org/cgi-bin/carddisp.pl?gene=SLX9</a>     |
| LGALS4 | Galectin 4                                 | Protein Coding | 44 | GC19M070551 | 2.00537014  | <a href="https://www.genecards.org/cgi-bin/carddisp.pl?gene=LGALS4">https://www.genecards.org/cgi-bin/carddisp.pl?gene=LGALS4</a> |

|         |                                                 |                |    |             |             |                                                                                                                                     |
|---------|-------------------------------------------------|----------------|----|-------------|-------------|-------------------------------------------------------------------------------------------------------------------------------------|
| ZBTB16  | Zinc Finger And BTB Domain Containing 16        | Protein Coding | 50 | GC11P114059 | 2.005048513 | <a href="https://www.genecards.org/cgi-bin/carddisp.pl?gene=ZBTB16">https://www.genecards.org/cgi-bin/carddisp.pl?gene=ZBTB16</a>   |
| PIGR    | Polymeric Immunoglobulin Receptor               | Protein Coding | 48 | GC01M206928 | 2.003614426 | <a href="https://www.genecards.org/cgi-bin/carddisp.pl?gene=PIGR">https://www.genecards.org/cgi-bin/carddisp.pl?gene=PIGR</a>       |
| ROR2    | Receptor Tyrosine Kinase Like Orphan Receptor 2 | Protein Coding | 55 | GC09M096500 | 1.999219894 | <a href="https://www.genecards.org/cgi-bin/carddisp.pl?gene=ROR2">https://www.genecards.org/cgi-bin/carddisp.pl?gene=ROR2</a>       |
| CA7     | Carbonic Anhydrase 7                            | Protein Coding | 44 | GC16P066844 | 1.998595476 | <a href="https://www.genecards.org/cgi-bin/carddisp.pl?gene=CA7">https://www.genecards.org/cgi-bin/carddisp.pl?gene=CA7</a>         |
| IFNGR1  | Interferon Gamma Receptor 1                     | Protein Coding | 57 | GC06M137197 | 1.997519255 | <a href="https://www.genecards.org/cgi-bin/carddisp.pl?gene=IFNGR1">https://www.genecards.org/cgi-bin/carddisp.pl?gene=IFNGR1</a>   |
| CCL7    | C-C Motif Chemokine Ligand 7                    | Protein Coding | 50 | GC17P034270 | 1.996502876 | <a href="https://www.genecards.org/cgi-bin/carddisp.pl?gene=CCL7">https://www.genecards.org/cgi-bin/carddisp.pl?gene=CCL7</a>       |
| SELPLG  | Selectin P Ligand                               | Protein Coding | 51 | GC12M108621 | 1.995840073 | <a href="https://www.genecards.org/cgi-bin/carddisp.pl?gene=SELPLG">https://www.genecards.org/cgi-bin/carddisp.pl?gene=SELPLG</a>   |
| C4B     | Complement C4B (Chido Blood Group)              | Protein Coding | 48 | GC06P032014 | 1.993642092 | <a href="https://www.genecards.org/cgi-bin/carddisp.pl?gene=C4B">https://www.genecards.org/cgi-bin/carddisp.pl?gene=C4B</a>         |
| WNT2    | Wnt Family Member 2                             | Protein Coding | 50 | GC07M117313 | 1.993524075 | <a href="https://www.genecards.org/cgi-bin/carddisp.pl?gene=WNT2">https://www.genecards.org/cgi-bin/carddisp.pl?gene=WNT2</a>       |
| LMX1B   | LIM Homeobox Transcription Factor 1 Beta        | Protein Coding | 51 | GC09P126614 | 1.992806673 | <a href="https://www.genecards.org/cgi-bin/carddisp.pl?gene=LMX1B">https://www.genecards.org/cgi-bin/carddisp.pl?gene=LMX1B</a>     |
| RHOH    | Ras Homolog Family Member H                     | Protein Coding | 51 | GC04P040192 | 1.990023136 | <a href="https://www.genecards.org/cgi-bin/carddisp.pl?gene=RHOH">https://www.genecards.org/cgi-bin/carddisp.pl?gene=RHOH</a>       |
| IL9     | Interleukin 9                                   | Protein Coding | 50 | GC05M135891 | 1.989136219 | <a href="https://www.genecards.org/cgi-bin/carddisp.pl?gene=IL9">https://www.genecards.org/cgi-bin/carddisp.pl?gene=IL9</a>         |
| GRB10   | Growth Factor Receptor Bound Protein 10         | Protein Coding | 49 | GC07M050590 | 1.986071348 | <a href="https://www.genecards.org/cgi-bin/carddisp.pl?gene=GRB10">https://www.genecards.org/cgi-bin/carddisp.pl?gene=GRB10</a>     |
| ROBO1   | Roundabout Guidance Receptor 1                  | Protein Coding | 51 | GC03M078597 | 1.984625578 | <a href="https://www.genecards.org/cgi-bin/carddisp.pl?gene=ROBO1">https://www.genecards.org/cgi-bin/carddisp.pl?gene=ROBO1</a>     |
| COL20A1 | Collagen Type XX Alpha 1 Chain                  | Protein Coding | 44 | GC20P063293 | 1.983115435 | <a href="https://www.genecards.org/cgi-bin/carddisp.pl?gene=COL20A1">https://www.genecards.org/cgi-bin/carddisp.pl?gene=COL20A1</a> |

|         |                                                       |                |    |             |             |                                                                                                                                     |
|---------|-------------------------------------------------------|----------------|----|-------------|-------------|-------------------------------------------------------------------------------------------------------------------------------------|
| PDCD6IP | Programmed Cell Death 6 Interacting Protein           | Protein Coding | 50 | GC03P033798 | 1.98204422  | <a href="https://www.genecards.org/cgi-bin/carddisp.pl?gene=PDCD6IP">https://www.genecards.org/cgi-bin/carddisp.pl?gene=PDCD6IP</a> |
| DCT     | Dopachrome Tautomerase                                | Protein Coding | 52 | GC13M094436 | 1.978040814 | <a href="https://www.genecards.org/cgi-bin/carddisp.pl?gene=DCT">https://www.genecards.org/cgi-bin/carddisp.pl?gene=DCT</a>         |
| MARCKS  | Myristoylated Alanine Rich Protein Kinase C Substrate | Protein Coding | 46 | GC06P113857 | 1.976188779 | <a href="https://www.genecards.org/cgi-bin/carddisp.pl?gene=MARCKS">https://www.genecards.org/cgi-bin/carddisp.pl?gene=MARCKS</a>   |
| SMAD1   | SMAD Family Member 1                                  | Protein Coding | 51 | GC04P145481 | 1.973513365 | <a href="https://www.genecards.org/cgi-bin/carddisp.pl?gene=SMAD1">https://www.genecards.org/cgi-bin/carddisp.pl?gene=SMAD1</a>     |
| CD63    | CD63 Molecule                                         | Protein Coding | 50 | GC12M055725 | 1.972302675 | <a href="https://www.genecards.org/cgi-bin/carddisp.pl?gene=CD63">https://www.genecards.org/cgi-bin/carddisp.pl?gene=CD63</a>       |
| TOP2B   | DNA Topoisomerase II Beta                             | Protein Coding | 52 | GC03M025598 | 1.970924854 | <a href="https://www.genecards.org/cgi-bin/carddisp.pl?gene=TOP2B">https://www.genecards.org/cgi-bin/carddisp.pl?gene=TOP2B</a>     |
| GADD45A | Growth Arrest And DNA Damage Inducible Alpha          | Protein Coding | 50 | GC01P067685 | 1.970365047 | <a href="https://www.genecards.org/cgi-bin/carddisp.pl?gene=GADD45A">https://www.genecards.org/cgi-bin/carddisp.pl?gene=GADD45A</a> |
| HLA-DMA | Major Histocompatibility Complex, Class II, DM Alpha  | Protein Coding | 46 | GC06M071795 | 1.966271639 | <a href="https://www.genecards.org/cgi-bin/carddisp.pl?gene=HLA-DMA">https://www.genecards.org/cgi-bin/carddisp.pl?gene=HLA-DMA</a> |
| TNFRSF8 | TNF Receptor Superfamily Member 8                     | Protein Coding | 50 | GC01P012063 | 1.965282679 | <a href="https://www.genecards.org/cgi-bin/carddisp.pl?gene=TNFRSF8">https://www.genecards.org/cgi-bin/carddisp.pl?gene=TNFRSF8</a> |
| PTPRJ   | Protein Tyrosine Phosphatase Receptor Type J          | Protein Coding | 55 | GC11P048002 | 1.964123964 | <a href="https://www.genecards.org/cgi-bin/carddisp.pl?gene=PTPRJ">https://www.genecards.org/cgi-bin/carddisp.pl?gene=PTPRJ</a>     |
| ADRA1A  | Adrenoceptor Alpha 1A                                 | Protein Coding | 53 | GC08M026747 | 1.963740349 | <a href="https://www.genecards.org/cgi-bin/carddisp.pl?gene=ADRA1A">https://www.genecards.org/cgi-bin/carddisp.pl?gene=ADRA1A</a>   |
| FKBP4   | FKBP Prolyl Isomerase 4                               | Protein Coding | 52 | GC12P002795 | 1.963716984 | <a href="https://www.genecards.org/cgi-bin/carddisp.pl?gene=FKBP4">https://www.genecards.org/cgi-bin/carddisp.pl?gene=FKBP4</a>     |
| POLR3K  | RNA Polymerase III Subunit K                          | Protein Coding | 47 | GC16M000046 | 1.963641405 | <a href="https://www.genecards.org/cgi-bin/carddisp.pl?gene=POLR3K">https://www.genecards.org/cgi-bin/carddisp.pl?gene=POLR3K</a>   |
| MYO5A   | Myosin VA                                             | Protein Coding | 51 | GC15M123722 | 1.962192774 | <a href="https://www.genecards.org/cgi-bin/carddisp.pl?gene=MYO5A">https://www.genecards.org/cgi-bin/carddisp.pl?gene=MYO5A</a>     |
| FRK     | Fyn Related Src Family Tyrosine Kinase                | Protein Coding | 51 | GC06M115931 | 1.962022543 | <a href="https://www.genecards.org/cgi-bin/carddisp.pl?gene=FRK">https://www.genecards.org/cgi-bin/carddisp.pl?gene=FRK</a>         |

|        |                                                      |                |    |             |             |                                                                                                                                   |
|--------|------------------------------------------------------|----------------|----|-------------|-------------|-----------------------------------------------------------------------------------------------------------------------------------|
| SLC6A6 | Solute Carrier Family 6 Member 6                     | Protein Coding | 52 | GC03P014402 | 1.960782766 | <a href="https://www.genecards.org/cgi-bin/carddisp.pl?gene=SLC6A6">https://www.genecards.org/cgi-bin/carddisp.pl?gene=SLC6A6</a> |
| SEMA3A | Semaphorin 3A                                        | Protein Coding | 53 | GC07M083955 | 1.9588871   | <a href="https://www.genecards.org/cgi-bin/carddisp.pl?gene=SEMA3A">https://www.genecards.org/cgi-bin/carddisp.pl?gene=SEMA3A</a> |
| FZD4   | Frizzled Class Receptor 4                            | Protein Coding | 56 | GC11M086945 | 1.957341671 | <a href="https://www.genecards.org/cgi-bin/carddisp.pl?gene=FZD4">https://www.genecards.org/cgi-bin/carddisp.pl?gene=FZD4</a>     |
| NAA10  | N-Alpha-Acetyltransferase 10, NatA Catalytic Subunit | Protein Coding | 52 | GC0XM153929 | 1.954634666 | <a href="https://www.genecards.org/cgi-bin/carddisp.pl?gene=NAA10">https://www.genecards.org/cgi-bin/carddisp.pl?gene=NAA10</a>   |
| S100A7 | S100 Calcium Binding Protein A7                      | Protein Coding | 46 | GC01M153457 | 1.948243737 | <a href="https://www.genecards.org/cgi-bin/carddisp.pl?gene=S100A7">https://www.genecards.org/cgi-bin/carddisp.pl?gene=S100A7</a> |
| FCER2  | Fc Epsilon Receptor II                               | Protein Coding | 50 | GC19M007689 | 1.944807529 | <a href="https://www.genecards.org/cgi-bin/carddisp.pl?gene=FCER2">https://www.genecards.org/cgi-bin/carddisp.pl?gene=FCER2</a>   |
| VASP   | Vasodilator Stimulated Phosphoprotein                | Protein Coding | 50 | GC19P073070 | 1.944025874 | <a href="https://www.genecards.org/cgi-bin/carddisp.pl?gene=VASP">https://www.genecards.org/cgi-bin/carddisp.pl?gene=VASP</a>     |
| TSG101 | Tumor Susceptibility 101                             | Protein Coding | 49 | GC11M018468 | 1.943533421 | <a href="https://www.genecards.org/cgi-bin/carddisp.pl?gene=TSG101">https://www.genecards.org/cgi-bin/carddisp.pl?gene=TSG101</a> |
| S100A1 | S100 Calcium Binding Protein A1                      | Protein Coding | 47 | GC01P153627 | 1.942153215 | <a href="https://www.genecards.org/cgi-bin/carddisp.pl?gene=S100A1">https://www.genecards.org/cgi-bin/carddisp.pl?gene=S100A1</a> |
| LAT    | Linker For Activation Of T Cells                     | Protein Coding | 53 | GC16P042656 | 1.938898325 | <a href="https://www.genecards.org/cgi-bin/carddisp.pl?gene=LAT">https://www.genecards.org/cgi-bin/carddisp.pl?gene=LAT</a>       |
| CCR1   | C-C Motif Chemokine Receptor 1                       | Protein Coding | 52 | GC03M046218 | 1.938135386 | <a href="https://www.genecards.org/cgi-bin/carddisp.pl?gene=CCR1">https://www.genecards.org/cgi-bin/carddisp.pl?gene=CCR1</a>     |
| LYST   | Lysosomal Trafficking Regulator                      | Protein Coding | 45 | GC01M235661 | 1.937011361 | <a href="https://www.genecards.org/cgi-bin/carddisp.pl?gene=LYST">https://www.genecards.org/cgi-bin/carddisp.pl?gene=LYST</a>     |
| ALCAM  | Activated Leukocyte Cell Adhesion Molecule           | Protein Coding | 50 | GC03P105366 | 1.936097383 | <a href="https://www.genecards.org/cgi-bin/carddisp.pl?gene=ALCAM">https://www.genecards.org/cgi-bin/carddisp.pl?gene=ALCAM</a>   |
| TJP1   | Tight Junction Protein 1                             | Protein Coding | 51 | GC15M029699 | 1.935941458 | <a href="https://www.genecards.org/cgi-bin/carddisp.pl?gene=TJP1">https://www.genecards.org/cgi-bin/carddisp.pl?gene=TJP1</a>     |
| EFNB2  | Ephrin B2                                            | Protein Coding | 50 | GC13M106489 | 1.931266308 | <a href="https://www.genecards.org/cgi-bin/carddisp.pl?gene=EFNB2">https://www.genecards.org/cgi-bin/carddisp.pl?gene=EFNB2</a>   |

|         |                                                         |                |    |             |             |                                                                                                                                       |
|---------|---------------------------------------------------------|----------------|----|-------------|-------------|---------------------------------------------------------------------------------------------------------------------------------------|
| STAT2   | Signal Transducer And Activator Of Transcription 2      | Protein Coding | 55 | GC12M056341 | 1.929269314 | <a href="https://www.genecards.org/cgi-bin/carddisp.pl?gene=STAT2">https://www.genecards.org/cgi-bin/carddisp.pl?gene=STAT2</a>       |
| RPL19   | Ribosomal Protein L19                                   | Protein Coding | 48 | GC17P039200 | 1.925439119 | <a href="https://www.genecards.org/cgi-bin/carddisp.pl?gene=RPL19">https://www.genecards.org/cgi-bin/carddisp.pl?gene=RPL19</a>       |
| HTR1B   | 5-Hydroxytryptamine Receptor 1B                         | Protein Coding | 50 | GC06M077488 | 1.925381422 | <a href="https://www.genecards.org/cgi-bin/carddisp.pl?gene=HTR1B">https://www.genecards.org/cgi-bin/carddisp.pl?gene=HTR1B</a>       |
| FER     | FER Tyrosine Kinase                                     | Protein Coding | 52 | GC05P108747 | 1.925205708 | <a href="https://www.genecards.org/cgi-bin/carddisp.pl?gene=FER">https://www.genecards.org/cgi-bin/carddisp.pl?gene=FER</a>           |
| RAPGEF3 | Rap Guanine Nucleotide Exchange Factor 3                | Protein Coding | 51 | GC12M047736 | 1.919921637 | <a href="https://www.genecards.org/cgi-bin/carddisp.pl?gene=RAPGEF3">https://www.genecards.org/cgi-bin/carddisp.pl?gene=RAPGEF3</a>   |
| PATJ    | PATJ Crumbs Cell Polarity Complex Component             | Protein Coding | 43 | GC01P061743 | 1.919464111 | <a href="https://www.genecards.org/cgi-bin/carddisp.pl?gene=PATJ">https://www.genecards.org/cgi-bin/carddisp.pl?gene=PATJ</a>         |
| PSMD4   | Proteasome 26S Subunit Ubiquitin Receptor, Non-ATPase 4 | Protein Coding | 50 | GC01P151378 | 1.917000532 | <a href="https://www.genecards.org/cgi-bin/carddisp.pl?gene=PSMD4">https://www.genecards.org/cgi-bin/carddisp.pl?gene=PSMD4</a>       |
| NRXN1   | Neurexin 1                                              | Protein Coding | 55 | GC02M049918 | 1.916447639 | <a href="https://www.genecards.org/cgi-bin/carddisp.pl?gene=NRXN1">https://www.genecards.org/cgi-bin/carddisp.pl?gene=NRXN1</a>       |
| RANBP9  | RAN Binding Protein 9                                   | Protein Coding | 48 | GC06M013621 | 1.916115046 | <a href="https://www.genecards.org/cgi-bin/carddisp.pl?gene=RANBP9">https://www.genecards.org/cgi-bin/carddisp.pl?gene=RANBP9</a>     |
| CEACAM3 | CEA Cell Adhesion Molecule 3                            | Protein Coding | 49 | GC19P041796 | 1.915868282 | <a href="https://www.genecards.org/cgi-bin/carddisp.pl?gene=CEACAM3">https://www.genecards.org/cgi-bin/carddisp.pl?gene=CEACAM3</a>   |
| MAP3K11 | Mitogen-Activated Protein Kinase Kinase Kinase 11       | Protein Coding | 53 | GC11M099713 | 1.914820433 | <a href="https://www.genecards.org/cgi-bin/carddisp.pl?gene=MAP3K11">https://www.genecards.org/cgi-bin/carddisp.pl?gene=MAP3K11</a>   |
| FGF8    | Fibroblast Growth Factor 8                              | Protein Coding | 54 | GC10M101770 | 1.91269207  | <a href="https://www.genecards.org/cgi-bin/carddisp.pl?gene=FGF8">https://www.genecards.org/cgi-bin/carddisp.pl?gene=FGF8</a>         |
| LHX3    | LIM Homeobox 3                                          | Protein Coding | 47 | GC09M136196 | 1.912455797 | <a href="https://www.genecards.org/cgi-bin/carddisp.pl?gene=LHX3">https://www.genecards.org/cgi-bin/carddisp.pl?gene=LHX3</a>         |
| MAP3K14 | Mitogen-Activated Protein Kinase Kinase Kinase 14       | Protein Coding | 51 | GC17M045263 | 1.910337448 | <a href="https://www.genecards.org/cgi-bin/carddisp.pl?gene=MAP3K14">https://www.genecards.org/cgi-bin/carddisp.pl?gene=MAP3K14</a>   |
| MPHOSPH | M-Phase Phosphoprotein 8                                | Protein Coding | 43 | GC13P019633 | 1.903998017 | <a href="https://www.genecards.org/cgi-bin/carddisp.pl?gene=MPHOSPH8">https://www.genecards.org/cgi-bin/carddisp.pl?gene=MPHOSPH8</a> |

|         |                                                                  |                |    |             |             |                                                                                                                                     |
|---------|------------------------------------------------------------------|----------------|----|-------------|-------------|-------------------------------------------------------------------------------------------------------------------------------------|
| SOS2    | SOS Ras/Rho Guanine Nucleotide Exchange Factor 2                 | Protein Coding | 51 | GC14M050117 | 1.903938532 | <a href="https://www.genecards.org/cgi-bin/carddisp.pl?gene=SOS2">https://www.genecards.org/cgi-bin/carddisp.pl?gene=SOS2</a>       |
| NCAM1   | Neural Cell Adhesion Molecule 1                                  | Protein Coding | 55 | GC11P112961 | 1.903778315 | <a href="https://www.genecards.org/cgi-bin/carddisp.pl?gene=NCAM1">https://www.genecards.org/cgi-bin/carddisp.pl?gene=NCAM1</a>     |
| FPR1    | Formyl Peptide Receptor 1                                        | Protein Coding | 54 | GC19M051745 | 1.9031353   | <a href="https://www.genecards.org/cgi-bin/carddisp.pl?gene=FPR1">https://www.genecards.org/cgi-bin/carddisp.pl?gene=FPR1</a>       |
| CEACAM7 | CEA Cell Adhesion Molecule 7                                     | Protein Coding | 44 | GC19M041673 | 1.902526498 | <a href="https://www.genecards.org/cgi-bin/carddisp.pl?gene=CEACAM7">https://www.genecards.org/cgi-bin/carddisp.pl?gene=CEACAM7</a> |
| BCAR1   | BCAR1 Scaffold Protein, Cas Family Member                        | Protein Coding | 50 | GC16M075228 | 1.898793936 | <a href="https://www.genecards.org/cgi-bin/carddisp.pl?gene=BCAR1">https://www.genecards.org/cgi-bin/carddisp.pl?gene=BCAR1</a>     |
| MAP3K1  | Mitogen-Activated Protein Kinase Kinase Kinase 1                 | Protein Coding | 56 | GC05P056815 | 1.898443699 | <a href="https://www.genecards.org/cgi-bin/carddisp.pl?gene=MAP3K1">https://www.genecards.org/cgi-bin/carddisp.pl?gene=MAP3K1</a>   |
| TRPC3   | Transient Receptor Potential Cation Channel Subfamily C Member 3 | Protein Coding | 54 | GC04M121879 | 1.893781662 | <a href="https://www.genecards.org/cgi-bin/carddisp.pl?gene=TRPC3">https://www.genecards.org/cgi-bin/carddisp.pl?gene=TRPC3</a>     |
| DDR2    | Discoidin Domain Receptor Tyrosine Kinase 2                      | Protein Coding | 59 | GC01P162631 | 1.891518831 | <a href="https://www.genecards.org/cgi-bin/carddisp.pl?gene=DDR2">https://www.genecards.org/cgi-bin/carddisp.pl?gene=DDR2</a>       |
| RALA    | RAS Like Proto-Oncogene A                                        | Protein Coding | 52 | GC07P039622 | 1.891065836 | <a href="https://www.genecards.org/cgi-bin/carddisp.pl?gene=RALA">https://www.genecards.org/cgi-bin/carddisp.pl?gene=RALA</a>       |
| CCR7    | C-C Motif Chemokine Receptor 7                                   | Protein Coding | 51 | GC17M051716 | 1.886298895 | <a href="https://www.genecards.org/cgi-bin/carddisp.pl?gene=CCR7">https://www.genecards.org/cgi-bin/carddisp.pl?gene=CCR7</a>       |
| KRT9    | Keratin 9                                                        | Protein Coding | 48 | GC17M041565 | 1.88619864  | <a href="https://www.genecards.org/cgi-bin/carddisp.pl?gene=KRT9">https://www.genecards.org/cgi-bin/carddisp.pl?gene=KRT9</a>       |
| SSTR5   | Somatostatin Receptor 5                                          | Protein Coding | 49 | GC16P001072 | 1.884937763 | <a href="https://www.genecards.org/cgi-bin/carddisp.pl?gene=SSTR5">https://www.genecards.org/cgi-bin/carddisp.pl?gene=SSTR5</a>     |
| SEC23IP | SEC23 Interacting Protein                                        | Protein Coding | 46 | GC10P119892 | 1.882997751 | <a href="https://www.genecards.org/cgi-bin/carddisp.pl?gene=SEC23IP">https://www.genecards.org/cgi-bin/carddisp.pl?gene=SEC23IP</a> |
| CD163   | CD163 Molecule                                                   | Protein Coding | 51 | GC12M008027 | 1.878556132 | <a href="https://www.genecards.org/cgi-bin/carddisp.pl?gene=CD163">https://www.genecards.org/cgi-bin/carddisp.pl?gene=CD163</a>     |
| DRD5    | Dopamine Receptor D5                                             | Protein Coding | 53 | GC04P009783 | 1.877865791 | <a href="https://www.genecards.org/cgi-bin/carddisp.pl?gene=DRD5">https://www.genecards.org/cgi-bin/carddisp.pl?gene=DRD5</a>       |

|        |                                                              |                |    |             |             |                                                                                                                                   |
|--------|--------------------------------------------------------------|----------------|----|-------------|-------------|-----------------------------------------------------------------------------------------------------------------------------------|
| UBE3C  | Ubiquitin Protein Ligase E3C                                 | Protein Coding | 46 | GC07P157138 | 1.877578497 | <a href="https://www.genecards.org/cgi-bin/carddisp.pl?gene=UBE3C">https://www.genecards.org/cgi-bin/carddisp.pl?gene=UBE3C</a>   |
| CARNS1 | Carnosine Synthase 1                                         | Protein Coding | 39 | GC11P067414 | 1.877417564 | <a href="https://www.genecards.org/cgi-bin/carddisp.pl?gene=CARNS1">https://www.genecards.org/cgi-bin/carddisp.pl?gene=CARNS1</a> |
| ARF6   | ADP Ribosylation Factor 6                                    | Protein Coding | 49 | GC14P049895 | 1.875149727 | <a href="https://www.genecards.org/cgi-bin/carddisp.pl?gene=ARF6">https://www.genecards.org/cgi-bin/carddisp.pl?gene=ARF6</a>     |
| KTN1   | Kinectin 1                                                   | Protein Coding | 48 | GC14P055559 | 1.87413168  | <a href="https://www.genecards.org/cgi-bin/carddisp.pl?gene=KTN1">https://www.genecards.org/cgi-bin/carddisp.pl?gene=KTN1</a>     |
| PRMT3  | Protein Arginine Methyltransferase 3                         | Protein Coding | 47 | GC11P020409 | 1.873780608 | <a href="https://www.genecards.org/cgi-bin/carddisp.pl?gene=PRMT3">https://www.genecards.org/cgi-bin/carddisp.pl?gene=PRMT3</a>   |
| NUCB1  | Nucleobindin 1                                               | Protein Coding | 48 | GC19P048900 | 1.873780489 | <a href="https://www.genecards.org/cgi-bin/carddisp.pl?gene=NUCB1">https://www.genecards.org/cgi-bin/carddisp.pl?gene=NUCB1</a>   |
| CDH23  | Cadherin Related 23                                          | Protein Coding | 51 | GC10P071396 | 1.872978449 | <a href="https://www.genecards.org/cgi-bin/carddisp.pl?gene=CDH23">https://www.genecards.org/cgi-bin/carddisp.pl?gene=CDH23</a>   |
| FGF10  | Fibroblast Growth Factor 10                                  | Protein Coding | 53 | GC05M044340 | 1.872734308 | <a href="https://www.genecards.org/cgi-bin/carddisp.pl?gene=FGF10">https://www.genecards.org/cgi-bin/carddisp.pl?gene=FGF10</a>   |
| HGS    | Hepatocyte Growth Factor-Regulated Tyrosine Kinase Substrate | Protein Coding | 50 | GC17P081683 | 1.870378494 | <a href="https://www.genecards.org/cgi-bin/carddisp.pl?gene=HGS">https://www.genecards.org/cgi-bin/carddisp.pl?gene=HGS</a>       |
| ADRA1B | Adrenoceptor Alpha 1B                                        | Protein Coding | 53 | GC05P159867 | 1.867448092 | <a href="https://www.genecards.org/cgi-bin/carddisp.pl?gene=ADRA1B">https://www.genecards.org/cgi-bin/carddisp.pl?gene=ADRA1B</a> |
| BLNK   | B Cell Linker                                                | Protein Coding | 53 | GC10M096259 | 1.864344835 | <a href="https://www.genecards.org/cgi-bin/carddisp.pl?gene=BLNK">https://www.genecards.org/cgi-bin/carddisp.pl?gene=BLNK</a>     |
| PTPN13 | Protein Tyrosine Phosphatase Non-Receptor Type 13            | Protein Coding | 51 | GC04P086594 | 1.858952284 | <a href="https://www.genecards.org/cgi-bin/carddisp.pl?gene=PTPN13">https://www.genecards.org/cgi-bin/carddisp.pl?gene=PTPN13</a> |
| WASL   | WASP Like Actin Nucleation Promoting Factor                  | Protein Coding | 48 | GC07M123681 | 1.858193636 | <a href="https://www.genecards.org/cgi-bin/carddisp.pl?gene=WASL">https://www.genecards.org/cgi-bin/carddisp.pl?gene=WASL</a>     |
| RPL23  | Ribosomal Protein L23                                        | Protein Coding | 47 | GC17M038847 | 1.85684371  | <a href="https://www.genecards.org/cgi-bin/carddisp.pl?gene=RPL23">https://www.genecards.org/cgi-bin/carddisp.pl?gene=RPL23</a>   |
| NEDD4  | NEDD4 E3 Ubiquitin Protein Ligase                            | Protein Coding | 54 | GC15M055826 | 1.856402278 | <a href="https://www.genecards.org/cgi-bin/carddisp.pl?gene=NEDD4">https://www.genecards.org/cgi-bin/carddisp.pl?gene=NEDD4</a>   |

|         |                                            |                |    |             |             |                                                                                                                                     |
|---------|--------------------------------------------|----------------|----|-------------|-------------|-------------------------------------------------------------------------------------------------------------------------------------|
| GREM1   | Gremlin 1, DAN Family BMP Antagonist       | Protein Coding | 50 | GC15P046226 | 1.855420828 | <a href="https://www.genecards.org/cgi-bin/carddisp.pl?gene=GREM1">https://www.genecards.org/cgi-bin/carddisp.pl?gene=GREM1</a>     |
| CSN2    | Casein Beta                                | Protein Coding | 40 | GC04M069955 | 1.854342461 | <a href="https://www.genecards.org/cgi-bin/carddisp.pl?gene=CSN2">https://www.genecards.org/cgi-bin/carddisp.pl?gene=CSN2</a>       |
| CALB2   | Calbindin 2                                | Protein Coding | 46 | GC16P071358 | 1.852124453 | <a href="https://www.genecards.org/cgi-bin/carddisp.pl?gene=CALB2">https://www.genecards.org/cgi-bin/carddisp.pl?gene=CALB2</a>     |
| GLRB    | Glycine Receptor Beta                      | Protein Coding | 53 | GC04P157076 | 1.851535916 | <a href="https://www.genecards.org/cgi-bin/carddisp.pl?gene=GLRB">https://www.genecards.org/cgi-bin/carddisp.pl?gene=GLRB</a>       |
| SULT6B1 | Sulfotransferase Family 6B Member 1        | Protein Coding | 40 | GC02M037167 | 1.847799659 | <a href="https://www.genecards.org/cgi-bin/carddisp.pl?gene=SULT6B1">https://www.genecards.org/cgi-bin/carddisp.pl?gene=SULT6B1</a> |
| EDN3    | Endothelin 3                               | Protein Coding | 51 | GC20P059300 | 1.847703934 | <a href="https://www.genecards.org/cgi-bin/carddisp.pl?gene=EDN3">https://www.genecards.org/cgi-bin/carddisp.pl?gene=EDN3</a>       |
| S100A4  | S100 Calcium Binding Protein A4            | Protein Coding | 52 | GC01M153543 | 1.846493006 | <a href="https://www.genecards.org/cgi-bin/carddisp.pl?gene=S100A4">https://www.genecards.org/cgi-bin/carddisp.pl?gene=S100A4</a>   |
| NOLC1   | Nucleolar And Coiled-Body Phosphoprotein 1 | Protein Coding | 47 | GC10P102152 | 1.845025539 | <a href="https://www.genecards.org/cgi-bin/carddisp.pl?gene=NOLC1">https://www.genecards.org/cgi-bin/carddisp.pl?gene=NOLC1</a>     |
| THY1    | Thy-1 Cell Surface Antigen                 | Protein Coding | 50 | GC11M119417 | 1.843530655 | <a href="https://www.genecards.org/cgi-bin/carddisp.pl?gene=THY1">https://www.genecards.org/cgi-bin/carddisp.pl?gene=THY1</a>       |
| DLG3    | Discs Large MAGUK Scaffold Protein 3       | Protein Coding | 49 | GC0XP070444 | 1.843284726 | <a href="https://www.genecards.org/cgi-bin/carddisp.pl?gene=DLG3">https://www.genecards.org/cgi-bin/carddisp.pl?gene=DLG3</a>       |
| GRK6    | G Protein-Coupled Receptor Kinase 6        | Protein Coding | 53 | GC05P177403 | 1.840342522 | <a href="https://www.genecards.org/cgi-bin/carddisp.pl?gene=GRK6">https://www.genecards.org/cgi-bin/carddisp.pl?gene=GRK6</a>       |
| TNFAIP6 | TNF Alpha Induced Protein 6                | Protein Coding | 47 | GC02P151357 | 1.840254068 | <a href="https://www.genecards.org/cgi-bin/carddisp.pl?gene=TNFAIP6">https://www.genecards.org/cgi-bin/carddisp.pl?gene=TNFAIP6</a> |
| EREG    | Epiregulin                                 | Protein Coding | 50 | GC04P074366 | 1.837180853 | <a href="https://www.genecards.org/cgi-bin/carddisp.pl?gene=EREG">https://www.genecards.org/cgi-bin/carddisp.pl?gene=EREG</a>       |
| PDGFA   | Platelet Derived Growth Factor Subunit A   | Protein Coding | 50 | GC07M000497 | 1.837180853 | <a href="https://www.genecards.org/cgi-bin/carddisp.pl?gene=PDGFA">https://www.genecards.org/cgi-bin/carddisp.pl?gene=PDGFA</a>     |
| ABCC11  | ATP Binding Cassette Subfamily C Member 11 | Protein Coding | 48 | GC16M048166 | 1.835193396 | <a href="https://www.genecards.org/cgi-bin/carddisp.pl?gene=ABCC11">https://www.genecards.org/cgi-bin/carddisp.pl?gene=ABCC11</a>   |

|         |                                                          |                |    |             |             |                                                                                                                                     |
|---------|----------------------------------------------------------|----------------|----|-------------|-------------|-------------------------------------------------------------------------------------------------------------------------------------|
| RPL37   | Ribosomal Protein L37                                    | Protein Coding | 45 | GC05M040825 | 1.834323168 | <a href="https://www.genecards.org/cgi-bin/carddisp.pl?gene=RPL37">https://www.genecards.org/cgi-bin/carddisp.pl?gene=RPL37</a>     |
| PLCL1   | Phospholipase C Like 1 (Inactive)                        | Protein Coding | 46 | GC02P197804 | 1.834127903 | <a href="https://www.genecards.org/cgi-bin/carddisp.pl?gene=PLCL1">https://www.genecards.org/cgi-bin/carddisp.pl?gene=PLCL1</a>     |
| AQP1    | Aquaporin 1 (Colton Blood Group)                         | Protein Coding | 53 | GC07P030911 | 1.833886862 | <a href="https://www.genecards.org/cgi-bin/carddisp.pl?gene=AQP1">https://www.genecards.org/cgi-bin/carddisp.pl?gene=AQP1</a>       |
| FLOT2   | Flotillin 2                                              | Protein Coding | 47 | GC17M051195 | 1.832614422 | <a href="https://www.genecards.org/cgi-bin/carddisp.pl?gene=FLOT2">https://www.genecards.org/cgi-bin/carddisp.pl?gene=FLOT2</a>     |
| CREM    | CAMP Responsive Element Modulator                        | Protein Coding | 48 | GC10P035126 | 1.831388235 | <a href="https://www.genecards.org/cgi-bin/carddisp.pl?gene=CREM">https://www.genecards.org/cgi-bin/carddisp.pl?gene=CREM</a>       |
| NRP2    | Neuropilin 2                                             | Protein Coding | 52 | GC02P205681 | 1.830303192 | <a href="https://www.genecards.org/cgi-bin/carddisp.pl?gene=NRP2">https://www.genecards.org/cgi-bin/carddisp.pl?gene=NRP2</a>       |
| BDKRB1  | Bradykinin Receptor B1                                   | Protein Coding | 48 | GC14P096302 | 1.830173969 | <a href="https://www.genecards.org/cgi-bin/carddisp.pl?gene=BDKRB1">https://www.genecards.org/cgi-bin/carddisp.pl?gene=BDKRB1</a>   |
| DIABLO  | Diablo IAP-Binding Mitochondrial Protein                 | Protein Coding | 53 | GC12M122497 | 1.829569101 | <a href="https://www.genecards.org/cgi-bin/carddisp.pl?gene=DIABLO">https://www.genecards.org/cgi-bin/carddisp.pl?gene=DIABLO</a>   |
| OGDHL   | Oxoglutarate Dehydrogenase L                             | Protein Coding | 47 | GC10M049734 | 1.827629805 | <a href="https://www.genecards.org/cgi-bin/carddisp.pl?gene=OGDHL">https://www.genecards.org/cgi-bin/carddisp.pl?gene=OGDHL</a>     |
| ATP2C1  | ATPase Secretory Pathway Ca <sup>2+</sup> Transporting 1 | Protein Coding | 51 | GC03P130850 | 1.827577353 | <a href="https://www.genecards.org/cgi-bin/carddisp.pl?gene=ATP2C1">https://www.genecards.org/cgi-bin/carddisp.pl?gene=ATP2C1</a>   |
| H1-2    | H1.2 Linker Histone, Cluster Member                      | Protein Coding | 46 | GC06M026056 | 1.826867104 | <a href="https://www.genecards.org/cgi-bin/carddisp.pl?gene=H1-2">https://www.genecards.org/cgi-bin/carddisp.pl?gene=H1-2</a>       |
| HRH2    | Histamine Receptor H2                                    | Protein Coding | 50 | GC05P175659 | 1.824629188 | <a href="https://www.genecards.org/cgi-bin/carddisp.pl?gene=HRH2">https://www.genecards.org/cgi-bin/carddisp.pl?gene=HRH2</a>       |
| PSME3   | Proteasome Activator Subunit 3                           | Protein Coding | 47 | GC17P042824 | 1.823475361 | <a href="https://www.genecards.org/cgi-bin/carddisp.pl?gene=PSME3">https://www.genecards.org/cgi-bin/carddisp.pl?gene=PSME3</a>     |
| PTPN12  | Protein Tyrosine Phosphatase Non-Receptor Type 12        | Protein Coding | 55 | GC07P077537 | 1.822618484 | <a href="https://www.genecards.org/cgi-bin/carddisp.pl?gene=PTPN12">https://www.genecards.org/cgi-bin/carddisp.pl?gene=PTPN12</a>   |
| RPS6KA5 | Ribosomal Protein S6 Kinase A5                           | Protein Coding | 52 | GC14M090847 | 1.822618484 | <a href="https://www.genecards.org/cgi-bin/carddisp.pl?gene=RPS6KA5">https://www.genecards.org/cgi-bin/carddisp.pl?gene=RPS6KA5</a> |

|         |                                                  |                |    |             |             |                                                                                                                                     |
|---------|--------------------------------------------------|----------------|----|-------------|-------------|-------------------------------------------------------------------------------------------------------------------------------------|
| CAPN1   | Calpain 1                                        | Protein Coding | 57 | GC11P070846 | 1.822430849 | <a href="https://www.genecards.org/cgi-bin/carddisp.pl?gene=CAPN1">https://www.genecards.org/cgi-bin/carddisp.pl?gene=CAPN1</a>     |
| ARHGEF1 | Rho Guanine Nucleotide Exchange Factor 1         | Protein Coding | 53 | GC19P041883 | 1.820183396 | <a href="https://www.genecards.org/cgi-bin/carddisp.pl?gene=ARHGEF1">https://www.genecards.org/cgi-bin/carddisp.pl?gene=ARHGEF1</a> |
| SLC6A11 | Solute Carrier Family 6 Member 11                | Protein Coding | 47 | GC03P013696 | 1.819394827 | <a href="https://www.genecards.org/cgi-bin/carddisp.pl?gene=SLC6A11">https://www.genecards.org/cgi-bin/carddisp.pl?gene=SLC6A11</a> |
| MYOZ2   | Myozenin 2                                       | Protein Coding | 46 | GC04P119135 | 1.819327593 | <a href="https://www.genecards.org/cgi-bin/carddisp.pl?gene=MYOZ2">https://www.genecards.org/cgi-bin/carddisp.pl?gene=MYOZ2</a>     |
| HCAR3   | Hydroxycarboxylic Acid Receptor 3                | Protein Coding | 42 | GC12M122714 | 1.818952322 | <a href="https://www.genecards.org/cgi-bin/carddisp.pl?gene=HCAR3">https://www.genecards.org/cgi-bin/carddisp.pl?gene=HCAR3</a>     |
| NISCH   | Nischarin                                        | Protein Coding | 50 | GC03P052455 | 1.817929626 | <a href="https://www.genecards.org/cgi-bin/carddisp.pl?gene=NISCH">https://www.genecards.org/cgi-bin/carddisp.pl?gene=NISCH</a>     |
| NRG4    | Neuregulin 4                                     | Protein Coding | 46 | GC15M075935 | 1.813503981 | <a href="https://www.genecards.org/cgi-bin/carddisp.pl?gene=NRG4">https://www.genecards.org/cgi-bin/carddisp.pl?gene=NRG4</a>       |
| CHRM1   | Cholinergic Receptor Muscarinic 1                | Protein Coding | 52 | GC11M099605 | 1.81216979  | <a href="https://www.genecards.org/cgi-bin/carddisp.pl?gene=CHRM1">https://www.genecards.org/cgi-bin/carddisp.pl?gene=CHRM1</a>     |
| PTPRA   | Protein Tyrosine Phosphatase Receptor Type A     | Protein Coding | 52 | GC20P002864 | 1.810213327 | <a href="https://www.genecards.org/cgi-bin/carddisp.pl?gene=PTPRA">https://www.genecards.org/cgi-bin/carddisp.pl?gene=PTPRA</a>     |
| MAPK12  | Mitogen-Activated Protein Kinase 12              | Protein Coding | 54 | GC22M061616 | 1.809207439 | <a href="https://www.genecards.org/cgi-bin/carddisp.pl?gene=MAPK12">https://www.genecards.org/cgi-bin/carddisp.pl?gene=MAPK12</a>   |
| BMX     | BMX Non-Receptor Tyrosine Kinase                 | Protein Coding | 51 | GC0XP015392 | 1.80903244  | <a href="https://www.genecards.org/cgi-bin/carddisp.pl?gene=BMX">https://www.genecards.org/cgi-bin/carddisp.pl?gene=BMX</a>         |
| PTPN6   | Protein Tyrosine Phosphatase Non-Receptor Type 6 | Protein Coding | 56 | GC12P023562 | 1.804846287 | <a href="https://www.genecards.org/cgi-bin/carddisp.pl?gene=PTPN6">https://www.genecards.org/cgi-bin/carddisp.pl?gene=PTPN6</a>     |
| PTPRS   | Protein Tyrosine Phosphatase Receptor Type S     | Protein Coding | 52 | GC19M006881 | 1.800232887 | <a href="https://www.genecards.org/cgi-bin/carddisp.pl?gene=PTPRS">https://www.genecards.org/cgi-bin/carddisp.pl?gene=PTPRS</a>     |
| CDH5    | Cadherin 5                                       | Protein Coding | 52 | GC16P066366 | 1.79877305  | <a href="https://www.genecards.org/cgi-bin/carddisp.pl?gene=CDH5">https://www.genecards.org/cgi-bin/carddisp.pl?gene=CDH5</a>       |
| IL10RA  | Interleukin 10 Receptor Subunit Alpha            | Protein Coding | 53 | GC11P117987 | 1.796459913 | <a href="https://www.genecards.org/cgi-bin/carddisp.pl?gene=IL10RA">https://www.genecards.org/cgi-bin/carddisp.pl?gene=IL10RA</a>   |

|         |                                                                      |                |    |             |             |                                                                                                                                     |
|---------|----------------------------------------------------------------------|----------------|----|-------------|-------------|-------------------------------------------------------------------------------------------------------------------------------------|
| FES     | FES Proto-Oncogene, Tyrosine Kinase                                  | Protein Coding | 54 | GC15P090883 | 1.794123411 | <a href="https://www.genecards.org/cgi-bin/carddisp.pl?gene=FES">https://www.genecards.org/cgi-bin/carddisp.pl?gene=FES</a>         |
| EPS15   | Epidermal Growth Factor Receptor Pathway Substrate 15                | Protein Coding | 51 | GC01M051354 | 1.792013168 | <a href="https://www.genecards.org/cgi-bin/carddisp.pl?gene=EPS15">https://www.genecards.org/cgi-bin/carddisp.pl?gene=EPS15</a>     |
| TPTE    | Transmembrane Phosphatase With Tensin Homology                       | Protein Coding | 43 | GC21P010521 | 1.791667461 | <a href="https://www.genecards.org/cgi-bin/carddisp.pl?gene=TPTE">https://www.genecards.org/cgi-bin/carddisp.pl?gene=TPTE</a>       |
| MAP1B   | Microtubule Associated Protein 1B                                    | Protein Coding | 51 | GC05P072107 | 1.789745569 | <a href="https://www.genecards.org/cgi-bin/carddisp.pl?gene=MAP1B">https://www.genecards.org/cgi-bin/carddisp.pl?gene=MAP1B</a>     |
| DUSP2   | Dual Specificity Phosphatase 2                                       | Protein Coding | 46 | GC02M098753 | 1.78924489  | <a href="https://www.genecards.org/cgi-bin/carddisp.pl?gene=DUSP2">https://www.genecards.org/cgi-bin/carddisp.pl?gene=DUSP2</a>     |
| MCM7    | Minichromosome Maintenance Complex Component 7                       | Protein Coding | 52 | GC07M100092 | 1.788851023 | <a href="https://www.genecards.org/cgi-bin/carddisp.pl?gene=MCM7">https://www.genecards.org/cgi-bin/carddisp.pl?gene=MCM7</a>       |
| BBS9    | Bardet-Biedl Syndrome 9                                              | Protein Coding | 45 | GC07P033323 | 1.786626101 | <a href="https://www.genecards.org/cgi-bin/carddisp.pl?gene=BBS9">https://www.genecards.org/cgi-bin/carddisp.pl?gene=BBS9</a>       |
| LCP2    | Lymphocyte Cytosolic Protein 2                                       | Protein Coding | 50 | GC05M170246 | 1.783881903 | <a href="https://www.genecards.org/cgi-bin/carddisp.pl?gene=LCP2">https://www.genecards.org/cgi-bin/carddisp.pl?gene=LCP2</a>       |
| MAP4K4  | Mitogen-Activated Protein Kinase Kinase Kinase Kinase 4              | Protein Coding | 54 | GC02P101696 | 1.783666372 | <a href="https://www.genecards.org/cgi-bin/carddisp.pl?gene=MAP4K4">https://www.genecards.org/cgi-bin/carddisp.pl?gene=MAP4K4</a>   |
| MAGI3   | Membrane Associated Guanylate Kinase, WW And PDZ Domain Containing 3 | Protein Coding | 40 | GC01P113390 | 1.782776356 | <a href="https://www.genecards.org/cgi-bin/carddisp.pl?gene=MAGI3">https://www.genecards.org/cgi-bin/carddisp.pl?gene=MAGI3</a>     |
| RELN    | Reelin                                                               | Protein Coding | 51 | GC07M103471 | 1.78237772  | <a href="https://www.genecards.org/cgi-bin/carddisp.pl?gene=RELN">https://www.genecards.org/cgi-bin/carddisp.pl?gene=RELN</a>       |
| STAT4   | Signal Transducer And Activator Of Transcription 4                   | Protein Coding | 53 | GC02M191029 | 1.777585745 | <a href="https://www.genecards.org/cgi-bin/carddisp.pl?gene=STAT4">https://www.genecards.org/cgi-bin/carddisp.pl?gene=STAT4</a>     |
| TTK     | TTK Protein Kinase                                                   | Protein Coding | 55 | GC06P080003 | 1.777347088 | <a href="https://www.genecards.org/cgi-bin/carddisp.pl?gene=TTK">https://www.genecards.org/cgi-bin/carddisp.pl?gene=TTK</a>         |
| PNOC    | Prepronociceptin                                                     | Protein Coding | 44 | GC08P028316 | 1.774571419 | <a href="https://www.genecards.org/cgi-bin/carddisp.pl?gene=PNOC">https://www.genecards.org/cgi-bin/carddisp.pl?gene=PNOC</a>       |
| ARHGEF7 | Rho Guanine Nucleotide Exchange Factor 7                             | Protein Coding | 49 | GC13P111114 | 1.77340126  | <a href="https://www.genecards.org/cgi-bin/carddisp.pl?gene=ARHGEF7">https://www.genecards.org/cgi-bin/carddisp.pl?gene=ARHGEF7</a> |

|         |                                                   |                |    |             |             |                                                                                                                                     |
|---------|---------------------------------------------------|----------------|----|-------------|-------------|-------------------------------------------------------------------------------------------------------------------------------------|
| PIP5KL1 | Phosphatidylinositol-4-Phosphate 5-Kinase Like 1  | Protein Coding | 41 | GC09M127920 | 1.773319483 | <a href="https://www.genecards.org/cgi-bin/carddisp.pl?gene=PIP5KL1">https://www.genecards.org/cgi-bin/carddisp.pl?gene=PIP5KL1</a> |
| AP2M1   | Adaptor Related Protein Complex 2 Subunit Mu 1    | Protein Coding | 52 | GC03P184174 | 1.772878528 | <a href="https://www.genecards.org/cgi-bin/carddisp.pl?gene=AP2M1">https://www.genecards.org/cgi-bin/carddisp.pl?gene=AP2M1</a>     |
| SIGLEC7 | Sialic Acid Binding Ig Like Lectin 7              | Protein Coding | 48 | GC19P051142 | 1.770597219 | <a href="https://www.genecards.org/cgi-bin/carddisp.pl?gene=SIGLEC7">https://www.genecards.org/cgi-bin/carddisp.pl?gene=SIGLEC7</a> |
| PTGFR   | Prostaglandin F Receptor                          | Protein Coding | 52 | GC01P078303 | 1.767858982 | <a href="https://www.genecards.org/cgi-bin/carddisp.pl?gene=PTGFR">https://www.genecards.org/cgi-bin/carddisp.pl?gene=PTGFR</a>     |
| OPRK1   | Opioid Receptor Kappa 1                           | Protein Coding | 52 | GC08M053227 | 1.767608881 | <a href="https://www.genecards.org/cgi-bin/carddisp.pl?gene=OPRK1">https://www.genecards.org/cgi-bin/carddisp.pl?gene=OPRK1</a>     |
| NTF4    | Neurotrophin 4                                    | Protein Coding | 53 | GC19M070877 | 1.765598536 | <a href="https://www.genecards.org/cgi-bin/carddisp.pl?gene=NTF4">https://www.genecards.org/cgi-bin/carddisp.pl?gene=NTF4</a>       |
| CD82    | CD82 Molecule                                     | Protein Coding | 50 | GC11P044586 | 1.765353203 | <a href="https://www.genecards.org/cgi-bin/carddisp.pl?gene=CD82">https://www.genecards.org/cgi-bin/carddisp.pl?gene=CD82</a>       |
| BYSL    | Bystin Like                                       | Protein Coding | 44 | GC06P092335 | 1.764038563 | <a href="https://www.genecards.org/cgi-bin/carddisp.pl?gene=BYSL">https://www.genecards.org/cgi-bin/carddisp.pl?gene=BYSL</a>       |
| LRPAP1  | LDL Receptor Related Protein Associated Protein 1 | Protein Coding | 50 | GC04M003508 | 1.763132095 | <a href="https://www.genecards.org/cgi-bin/carddisp.pl?gene=LRPAP1">https://www.genecards.org/cgi-bin/carddisp.pl?gene=LRPAP1</a>   |
| DUSP4   | Dual Specificity Phosphatase 4                    | Protein Coding | 48 | GC08M029334 | 1.76159811  | <a href="https://www.genecards.org/cgi-bin/carddisp.pl?gene=DUSP4">https://www.genecards.org/cgi-bin/carddisp.pl?gene=DUSP4</a>     |
| SHROOM3 | Shroom Family Member 3                            | Protein Coding | 44 | GC04P076435 | 1.760527134 | <a href="https://www.genecards.org/cgi-bin/carddisp.pl?gene=SHROOM3">https://www.genecards.org/cgi-bin/carddisp.pl?gene=SHROOM3</a> |
| TUBA4A  | Tubulin Alpha 4a                                  | Protein Coding | 53 | GC02M219249 | 1.75995791  | <a href="https://www.genecards.org/cgi-bin/carddisp.pl?gene=TUBA4A">https://www.genecards.org/cgi-bin/carddisp.pl?gene=TUBA4A</a>   |
| SSTR1   | Somatostatin Receptor 1                           | Protein Coding | 50 | GC14P038207 | 1.759299755 | <a href="https://www.genecards.org/cgi-bin/carddisp.pl?gene=SSTR1">https://www.genecards.org/cgi-bin/carddisp.pl?gene=SSTR1</a>     |
| NES     | Nestin                                            | Protein Coding | 47 | GC01M156668 | 1.757391214 | <a href="https://www.genecards.org/cgi-bin/carddisp.pl?gene=NES">https://www.genecards.org/cgi-bin/carddisp.pl?gene=NES</a>         |
| POLI    | DNA Polymerase Iota                               | Protein Coding | 48 | GC18P054274 | 1.755850792 | <a href="https://www.genecards.org/cgi-bin/carddisp.pl?gene=POLI">https://www.genecards.org/cgi-bin/carddisp.pl?gene=POLI</a>       |

|         |                                                    |                |    |             |             |                                                                                                                                     |
|---------|----------------------------------------------------|----------------|----|-------------|-------------|-------------------------------------------------------------------------------------------------------------------------------------|
| DDX60L  | DExD/H-Box 60 Like                                 | Protein Coding | 38 | GC04M168356 | 1.755546331 | <a href="https://www.genecards.org/cgi-bin/carddisp.pl?gene=DDX60L">https://www.genecards.org/cgi-bin/carddisp.pl?gene=DDX60L</a>   |
| C5      | Complement C5                                      | Protein Coding | 53 | GC09M120933 | 1.753865361 | <a href="https://www.genecards.org/cgi-bin/carddisp.pl?gene=C5">https://www.genecards.org/cgi-bin/carddisp.pl?gene=C5</a>           |
| IL18R1  | Interleukin 18 Receptor 1                          | Protein Coding | 50 | GC02P102311 | 1.750156641 | <a href="https://www.genecards.org/cgi-bin/carddisp.pl?gene=IL18R1">https://www.genecards.org/cgi-bin/carddisp.pl?gene=IL18R1</a>   |
| MYOG    | Myogenin                                           | Protein Coding | 46 | GC01M203083 | 1.747856379 | <a href="https://www.genecards.org/cgi-bin/carddisp.pl?gene=MYOG">https://www.genecards.org/cgi-bin/carddisp.pl?gene=MYOG</a>       |
| SEMA7A  | Semaphorin 7A (John Milton Hagen Blood Group)      | Protein Coding | 51 | GC15M074409 | 1.747343063 | <a href="https://www.genecards.org/cgi-bin/carddisp.pl?gene=SEMA7A">https://www.genecards.org/cgi-bin/carddisp.pl?gene=SEMA7A</a>   |
| CD80    | CD80 Molecule                                      | Protein Coding | 51 | GC03M119524 | 1.745079517 | <a href="https://www.genecards.org/cgi-bin/carddisp.pl?gene=CD80">https://www.genecards.org/cgi-bin/carddisp.pl?gene=CD80</a>       |
| DUSP6   | Dual Specificity Phosphatase 6                     | Protein Coding | 55 | GC12M089347 | 1.744764328 | <a href="https://www.genecards.org/cgi-bin/carddisp.pl?gene=DUSP6">https://www.genecards.org/cgi-bin/carddisp.pl?gene=DUSP6</a>     |
| RPL26L1 | Ribosomal Protein L26 Like 1                       | Protein Coding | 40 | GC05P172956 | 1.743719578 | <a href="https://www.genecards.org/cgi-bin/carddisp.pl?gene=RPL26L1">https://www.genecards.org/cgi-bin/carddisp.pl?gene=RPL26L1</a> |
| NMUR1   | Neuromedin U Receptor 1                            | Protein Coding | 48 | GC02M231986 | 1.743004799 | <a href="https://www.genecards.org/cgi-bin/carddisp.pl?gene=NMUR1">https://www.genecards.org/cgi-bin/carddisp.pl?gene=NMUR1</a>     |
| KAT6A   | Lysine Acetyltransferase 6A                        | Protein Coding | 52 | GC08M041929 | 1.74228096  | <a href="https://www.genecards.org/cgi-bin/carddisp.pl?gene=KAT6A">https://www.genecards.org/cgi-bin/carddisp.pl?gene=KAT6A</a>     |
| SEMA3C  | Semaphorin 3C                                      | Protein Coding | 51 | GC07M080742 | 1.742024899 | <a href="https://www.genecards.org/cgi-bin/carddisp.pl?gene=SEMA3C">https://www.genecards.org/cgi-bin/carddisp.pl?gene=SEMA3C</a>   |
| SIGLEC5 | Sialic Acid Binding Ig Like Lectin 5               | Protein Coding | 47 | GC19M071022 | 1.737704039 | <a href="https://www.genecards.org/cgi-bin/carddisp.pl?gene=SIGLEC5">https://www.genecards.org/cgi-bin/carddisp.pl?gene=SIGLEC5</a> |
| H2BC12L | H2B Clustered Histone 12 Like                      | Protein Coding | 34 | GC21P043569 | 1.736407399 | <a href="https://www.genecards.org/cgi-bin/carddisp.pl?gene=H2BC12L">https://www.genecards.org/cgi-bin/carddisp.pl?gene=H2BC12L</a> |
| GRIN3A  | Glutamate Ionotropic Receptor NMDA Type Subunit 3A | Protein Coding | 46 | GC09M101569 | 1.736349583 | <a href="https://www.genecards.org/cgi-bin/carddisp.pl?gene=GRIN3A">https://www.genecards.org/cgi-bin/carddisp.pl?gene=GRIN3A</a>   |
| CORT    | Cortistatin                                        | Protein Coding | 41 | GC01P010529 | 1.734572053 | <a href="https://www.genecards.org/cgi-bin/carddisp.pl?gene=CORT">https://www.genecards.org/cgi-bin/carddisp.pl?gene=CORT</a>       |

|         |                                                  |                |    |             |             |                                                                                                                                     |
|---------|--------------------------------------------------|----------------|----|-------------|-------------|-------------------------------------------------------------------------------------------------------------------------------------|
| RGS4    | Regulator Of G Protein Signaling 4               | Protein Coding | 48 | GC01P163038 | 1.734306216 | <a href="https://www.genecards.org/cgi-bin/carddisp.pl?gene=RGS4">https://www.genecards.org/cgi-bin/carddisp.pl?gene=RGS4</a>       |
| HAPLN1  | Hyaluronan And Proteoglycan Link Protein 1       | Protein Coding | 48 | GC05M083637 | 1.732725978 | <a href="https://www.genecards.org/cgi-bin/carddisp.pl?gene=HAPLN1">https://www.genecards.org/cgi-bin/carddisp.pl?gene=HAPLN1</a>   |
| SCG2    | Secretogranin II                                 | Protein Coding | 46 | GC02M223596 | 1.731810331 | <a href="https://www.genecards.org/cgi-bin/carddisp.pl?gene=SCG2">https://www.genecards.org/cgi-bin/carddisp.pl?gene=SCG2</a>       |
| GIT1    | GIT ArfGAP 1                                     | Protein Coding | 49 | GC17M029573 | 1.728217602 | <a href="https://www.genecards.org/cgi-bin/carddisp.pl?gene=GIT1">https://www.genecards.org/cgi-bin/carddisp.pl?gene=GIT1</a>       |
| RAB9A   | RAB9A, Member RAS Oncogene Family                | Protein Coding | 45 | GC0XP013707 | 1.727880001 | <a href="https://www.genecards.org/cgi-bin/carddisp.pl?gene=RAB9A">https://www.genecards.org/cgi-bin/carddisp.pl?gene=RAB9A</a>     |
| TRIM27  | Tripartite Motif Containing 27                   | Protein Coding | 48 | GC06M028903 | 1.726555586 | <a href="https://www.genecards.org/cgi-bin/carddisp.pl?gene=TRIM27">https://www.genecards.org/cgi-bin/carddisp.pl?gene=TRIM27</a>   |
| PGAM4   | Phosphoglycerate Mutase Family Member 4          | Protein Coding | 41 | GC0XM077967 | 1.725485802 | <a href="https://www.genecards.org/cgi-bin/carddisp.pl?gene=PGAM4">https://www.genecards.org/cgi-bin/carddisp.pl?gene=PGAM4</a>     |
| IFNAR1  | Interferon Alpha And Beta Receptor Subunit 1     | Protein Coding | 55 | GC21P033324 | 1.725248218 | <a href="https://www.genecards.org/cgi-bin/carddisp.pl?gene=IFNAR1">https://www.genecards.org/cgi-bin/carddisp.pl?gene=IFNAR1</a>   |
| HOXA10  | Homeobox A10                                     | Protein Coding | 47 | GC07M027673 | 1.723849893 | <a href="https://www.genecards.org/cgi-bin/carddisp.pl?gene=HOXA10">https://www.genecards.org/cgi-bin/carddisp.pl?gene=HOXA10</a>   |
| MAP2K6  | Mitogen-Activated Protein Kinase Kinase 6        | Protein Coding | 53 | GC17P069414 | 1.720388412 | <a href="https://www.genecards.org/cgi-bin/carddisp.pl?gene=MAP2K6">https://www.genecards.org/cgi-bin/carddisp.pl?gene=MAP2K6</a>   |
| PENK    | Proenkephalin                                    | Protein Coding | 45 | GC08M056436 | 1.717689514 | <a href="https://www.genecards.org/cgi-bin/carddisp.pl?gene=PENK">https://www.genecards.org/cgi-bin/carddisp.pl?gene=PENK</a>       |
| SNTA1   | Syntrophin Alpha 1                               | Protein Coding | 52 | GC20M033407 | 1.717225552 | <a href="https://www.genecards.org/cgi-bin/carddisp.pl?gene=SNTA1">https://www.genecards.org/cgi-bin/carddisp.pl?gene=SNTA1</a>     |
| IRF8    | Interferon Regulatory Factor 8                   | Protein Coding | 52 | GC16P085898 | 1.716549635 | <a href="https://www.genecards.org/cgi-bin/carddisp.pl?gene=IRF8">https://www.genecards.org/cgi-bin/carddisp.pl?gene=IRF8</a>       |
| PTPDC1  | Protein Tyrosine Phosphatase Domain Containing 1 | Protein Coding | 39 | GC09P094030 | 1.710317612 | <a href="https://www.genecards.org/cgi-bin/carddisp.pl?gene=PTPDC1">https://www.genecards.org/cgi-bin/carddisp.pl?gene=PTPDC1</a>   |
| ZDHHC13 | Zinc Finger DHHC-Type Palmitoyltransferase 13    | Protein Coding | 44 | GC11P019095 | 1.710026741 | <a href="https://www.genecards.org/cgi-bin/carddisp.pl?gene=ZDHHC13">https://www.genecards.org/cgi-bin/carddisp.pl?gene=ZDHHC13</a> |

|              |                                                    |                |    |             |             |                                                                                                                                               |
|--------------|----------------------------------------------------|----------------|----|-------------|-------------|-----------------------------------------------------------------------------------------------------------------------------------------------|
| SSTR4        | Somatostatin Receptor 4                            | Protein Coding | 47 | GC20P023035 | 1.70855999  | <a href="https://www.genecards.org/cgi-bin/carddisp.pl?gene=SSTR4">https://www.genecards.org/cgi-bin/carddisp.pl?gene=SSTR4</a>               |
| TLK2         | Tousled Like Kinase 2                              | Protein Coding | 52 | GC17P062458 | 1.706749916 | <a href="https://www.genecards.org/cgi-bin/carddisp.pl?gene=TLK2">https://www.genecards.org/cgi-bin/carddisp.pl?gene=TLK2</a>                 |
| MPIG6B       | Megakaryocyte And Platelet Inhibitory Receptor G6b | Protein Coding | 44 | GC06P094327 | 1.706351757 | <a href="https://www.genecards.org/cgi-bin/carddisp.pl?gene=MPIG6B">https://www.genecards.org/cgi-bin/carddisp.pl?gene=MPIG6B</a>             |
| LIFR         | LIF Receptor Subunit Alpha                         | Protein Coding | 53 | GC05M038475 | 1.704889536 | <a href="https://www.genecards.org/cgi-bin/carddisp.pl?gene=LIFR">https://www.genecards.org/cgi-bin/carddisp.pl?gene=LIFR</a>                 |
| ZDHHC2       | Zinc Finger DHHC-Type Palmitoyltransferase 2       | Protein Coding | 44 | GC08P017156 | 1.704699993 | <a href="https://www.genecards.org/cgi-bin/carddisp.pl?gene=ZDHHC2">https://www.genecards.org/cgi-bin/carddisp.pl?gene=ZDHHC2</a>             |
| ZFP36        | ZFP36 Ring Finger Protein                          | Protein Coding | 44 | GC19P039406 | 1.703535914 | <a href="https://www.genecards.org/cgi-bin/carddisp.pl?gene=ZFP36">https://www.genecards.org/cgi-bin/carddisp.pl?gene=ZFP36</a>               |
| IL32         | Interleukin 32                                     | Protein Coding | 45 | GC16P013549 | 1.702359438 | <a href="https://www.genecards.org/cgi-bin/carddisp.pl?gene=IL32">https://www.genecards.org/cgi-bin/carddisp.pl?gene=IL32</a>                 |
| FPR2         | Formyl Peptide Receptor 2                          | Protein Coding | 53 | GC19P051752 | 1.70159018  | <a href="https://www.genecards.org/cgi-bin/carddisp.pl?gene=FPR2">https://www.genecards.org/cgi-bin/carddisp.pl?gene=FPR2</a>                 |
| SNCG         | Synuclein Gamma                                    | Protein Coding | 48 | GC10P094523 | 1.700464964 | <a href="https://www.genecards.org/cgi-bin/carddisp.pl?gene=SNCG">https://www.genecards.org/cgi-bin/carddisp.pl?gene=SNCG</a>                 |
| LOC102724560 | Cystathionine Beta-Synthase Like                   | Protein Coding | 10 | GC21M006444 | 1.700024605 | <a href="https://www.genecards.org/cgi-bin/carddisp.pl?gene=LOC102724560">https://www.genecards.org/cgi-bin/carddisp.pl?gene=LOC102724560</a> |
| DSG2         | Desmoglein 2                                       | Protein Coding | 52 | GC18P031498 | 1.697177649 | <a href="https://www.genecards.org/cgi-bin/carddisp.pl?gene=DSG2">https://www.genecards.org/cgi-bin/carddisp.pl?gene=DSG2</a>                 |
| PDLIM5       | PDZ And LIM Domain 5                               | Protein Coding | 47 | GC04P094451 | 1.693854332 | <a href="https://www.genecards.org/cgi-bin/carddisp.pl?gene=PDLIM5">https://www.genecards.org/cgi-bin/carddisp.pl?gene=PDLIM5</a>             |
| OPRL1        | Opioid Related Nociceptin Receptor 1               | Protein Coding | 53 | GC20P064080 | 1.692744732 | <a href="https://www.genecards.org/cgi-bin/carddisp.pl?gene=OPRL1">https://www.genecards.org/cgi-bin/carddisp.pl?gene=OPRL1</a>               |
| SLC7A10      | Solute Carrier Family 7 Member 10                  | Protein Coding | 44 | GC19M033208 | 1.691041231 | <a href="https://www.genecards.org/cgi-bin/carddisp.pl?gene=SLC7A10">https://www.genecards.org/cgi-bin/carddisp.pl?gene=SLC7A10</a>           |
| EPHB2        | EPH Receptor B2                                    | Protein Coding | 59 | GC01P022710 | 1.688824892 | <a href="https://www.genecards.org/cgi-bin/carddisp.pl?gene=EPHB2">https://www.genecards.org/cgi-bin/carddisp.pl?gene=EPHB2</a>               |

|         |                                                    |                |    |             |             |                                                                                                                                     |
|---------|----------------------------------------------------|----------------|----|-------------|-------------|-------------------------------------------------------------------------------------------------------------------------------------|
| PITX2   | Paired Like Homeodomain 2                          | Protein Coding | 52 | GC04M110617 | 1.687981844 | <a href="https://www.genecards.org/cgi-bin/carddisp.pl?gene=PITX2">https://www.genecards.org/cgi-bin/carddisp.pl?gene=PITX2</a>     |
| IL21    | Interleukin 21                                     | Protein Coding | 51 | GC04M122612 | 1.68727994  | <a href="https://www.genecards.org/cgi-bin/carddisp.pl?gene=IL21">https://www.genecards.org/cgi-bin/carddisp.pl?gene=IL21</a>       |
| ZDHHC18 | Zinc Finger DHHC-Type Palmitoyltransferase 18      | Protein Coding | 42 | GC01P028385 | 1.686555862 | <a href="https://www.genecards.org/cgi-bin/carddisp.pl?gene=ZDHHC18">https://www.genecards.org/cgi-bin/carddisp.pl?gene=ZDHHC18</a> |
| DUSP3   | Dual Specificity Phosphatase 3                     | Protein Coding | 51 | GC17M043766 | 1.68346417  | <a href="https://www.genecards.org/cgi-bin/carddisp.pl?gene=DUSP3">https://www.genecards.org/cgi-bin/carddisp.pl?gene=DUSP3</a>     |
| VIPR1   | Vasoactive Intestinal Peptide Receptor 1           | Protein Coding | 52 | GC03P042490 | 1.677259088 | <a href="https://www.genecards.org/cgi-bin/carddisp.pl?gene=VIPR1">https://www.genecards.org/cgi-bin/carddisp.pl?gene=VIPR1</a>     |
| RBL2    | RB Transcriptional Corepressor Like 2              | Protein Coding | 52 | GC16P053433 | 1.67690587  | <a href="https://www.genecards.org/cgi-bin/carddisp.pl?gene=RBL2">https://www.genecards.org/cgi-bin/carddisp.pl?gene=RBL2</a>       |
| OMD     | Osteomodulin                                       | Protein Coding | 46 | GC09M096534 | 1.674594641 | <a href="https://www.genecards.org/cgi-bin/carddisp.pl?gene=OMD">https://www.genecards.org/cgi-bin/carddisp.pl?gene=OMD</a>         |
| EEA1    | Early Endosome Antigen 1                           | Protein Coding | 48 | GC12M092770 | 1.672343969 | <a href="https://www.genecards.org/cgi-bin/carddisp.pl?gene=EEA1">https://www.genecards.org/cgi-bin/carddisp.pl?gene=EEA1</a>       |
| LYVE1   | Lymphatic Vessel Endothelial Hyaluronan Receptor 1 | Protein Coding | 49 | GC11M011131 | 1.659945846 | <a href="https://www.genecards.org/cgi-bin/carddisp.pl?gene=LYVE1">https://www.genecards.org/cgi-bin/carddisp.pl?gene=LYVE1</a>     |
| CD2     | CD2 Molecule                                       | Protein Coding | 51 | GC01P116754 | 1.659570932 | <a href="https://www.genecards.org/cgi-bin/carddisp.pl?gene=CD2">https://www.genecards.org/cgi-bin/carddisp.pl?gene=CD2</a>         |
| GAB2    | GRB2 Associated Binding Protein 2                  | Protein Coding | 50 | GC11M078215 | 1.656756639 | <a href="https://www.genecards.org/cgi-bin/carddisp.pl?gene=GAB2">https://www.genecards.org/cgi-bin/carddisp.pl?gene=GAB2</a>       |
| SRP19   | Signal Recognition Particle 19                     | Protein Coding | 46 | GC05P112862 | 1.65417254  | <a href="https://www.genecards.org/cgi-bin/carddisp.pl?gene=SRP19">https://www.genecards.org/cgi-bin/carddisp.pl?gene=SRP19</a>     |
| PTPRO   | Protein Tyrosine Phosphatase Receptor Type O       | Protein Coding | 54 | GC12P023827 | 1.647766829 | <a href="https://www.genecards.org/cgi-bin/carddisp.pl?gene=PTPRO">https://www.genecards.org/cgi-bin/carddisp.pl?gene=PTPRO</a>     |
| LIPI    | Lipase I                                           | Protein Coding | 42 | GC21M014108 | 1.644866705 | <a href="https://www.genecards.org/cgi-bin/carddisp.pl?gene=LIPI">https://www.genecards.org/cgi-bin/carddisp.pl?gene=LIPI</a>       |
| PTGIR   | Prostaglandin I2 Receptor                          | Protein Coding | 54 | GC19M070781 | 1.644169569 | <a href="https://www.genecards.org/cgi-bin/carddisp.pl?gene=PTGIR">https://www.genecards.org/cgi-bin/carddisp.pl?gene=PTGIR</a>     |

|         |                                                            |                |    |             |             |                                                                                                                                     |
|---------|------------------------------------------------------------|----------------|----|-------------|-------------|-------------------------------------------------------------------------------------------------------------------------------------|
| IL13RA1 | Interleukin 13 Receptor Subunit Alpha 1                    | Protein Coding | 48 | GC0XP118727 | 1.643259287 | <a href="https://www.genecards.org/cgi-bin/carddisp.pl?gene=IL13RA1">https://www.genecards.org/cgi-bin/carddisp.pl?gene=IL13RA1</a> |
| NRTN    | Neurturin                                                  | Protein Coding | 47 | GC19P005805 | 1.643030405 | <a href="https://www.genecards.org/cgi-bin/carddisp.pl?gene=NRTN">https://www.genecards.org/cgi-bin/carddisp.pl?gene=NRTN</a>       |
| PTGDR2  | Prostaglandin D2 Receptor 2                                | Protein Coding | 51 | GC11M060850 | 1.642745137 | <a href="https://www.genecards.org/cgi-bin/carddisp.pl?gene=PTGDR2">https://www.genecards.org/cgi-bin/carddisp.pl?gene=PTGDR2</a>   |
| TGOLN2  | Trans-Golgi Network Protein 2                              | Protein Coding | 44 | GC02M085318 | 1.642578602 | <a href="https://www.genecards.org/cgi-bin/carddisp.pl?gene=TGOLN2">https://www.genecards.org/cgi-bin/carddisp.pl?gene=TGOLN2</a>   |
| EPHA7   | EPH Receptor A7                                            | Protein Coding | 54 | GC06M093240 | 1.64180851  | <a href="https://www.genecards.org/cgi-bin/carddisp.pl?gene=EPHA7">https://www.genecards.org/cgi-bin/carddisp.pl?gene=EPHA7</a>     |
| LTK     | Leukocyte Receptor Tyrosine Kinase                         | Protein Coding | 49 | GC15M041503 | 1.64180851  | <a href="https://www.genecards.org/cgi-bin/carddisp.pl?gene=LTK">https://www.genecards.org/cgi-bin/carddisp.pl?gene=LTK</a>         |
| CCNT1   | Cyclin T1                                                  | Protein Coding | 47 | GC12M048688 | 1.640436649 | <a href="https://www.genecards.org/cgi-bin/carddisp.pl?gene=CCNT1">https://www.genecards.org/cgi-bin/carddisp.pl?gene=CCNT1</a>     |
| GRM3    | Glutamate Metabotropic Receptor 3                          | Protein Coding | 53 | GC07P086643 | 1.639108658 | <a href="https://www.genecards.org/cgi-bin/carddisp.pl?gene=GRM3">https://www.genecards.org/cgi-bin/carddisp.pl?gene=GRM3</a>       |
| ICA1    | Islet Cell Autoantigen 1                                   | Protein Coding | 47 | GC07M008428 | 1.638249993 | <a href="https://www.genecards.org/cgi-bin/carddisp.pl?gene=ICA1">https://www.genecards.org/cgi-bin/carddisp.pl?gene=ICA1</a>       |
| OSMR    | Oncostatin M Receptor                                      | Protein Coding | 52 | GC05P038845 | 1.636943102 | <a href="https://www.genecards.org/cgi-bin/carddisp.pl?gene=OSMR">https://www.genecards.org/cgi-bin/carddisp.pl?gene=OSMR</a>       |
| ICAM3   | Intercellular Adhesion Molecule 3                          | Protein Coding | 50 | GC19M010421 | 1.635703325 | <a href="https://www.genecards.org/cgi-bin/carddisp.pl?gene=ICAM3">https://www.genecards.org/cgi-bin/carddisp.pl?gene=ICAM3</a>     |
| SFRP1   | Secreted Frizzled Related Protein 1                        | Protein Coding | 51 | GC08M041262 | 1.635003924 | <a href="https://www.genecards.org/cgi-bin/carddisp.pl?gene=SFRP1">https://www.genecards.org/cgi-bin/carddisp.pl?gene=SFRP1</a>     |
| KCNJ4   | Potassium Inwardly Rectifying Channel Subfamily J Member 4 | Protein Coding | 50 | GC22M038426 | 1.631995916 | <a href="https://www.genecards.org/cgi-bin/carddisp.pl?gene=KCNJ4">https://www.genecards.org/cgi-bin/carddisp.pl?gene=KCNJ4</a>     |
| LIMK2   | LIM Domain Kinase 2                                        | Protein Coding | 52 | GC22P031212 | 1.629135966 | <a href="https://www.genecards.org/cgi-bin/carddisp.pl?gene=LIMK2">https://www.genecards.org/cgi-bin/carddisp.pl?gene=LIMK2</a>     |
| HAND2   | Heart And Neural Crest Derivatives Expressed 2             | Protein Coding | 50 | GC04M173524 | 1.628247738 | <a href="https://www.genecards.org/cgi-bin/carddisp.pl?gene=HAND2">https://www.genecards.org/cgi-bin/carddisp.pl?gene=HAND2</a>     |

|         |                                                          |                |    |             |             |                                                                                                                                     |
|---------|----------------------------------------------------------|----------------|----|-------------|-------------|-------------------------------------------------------------------------------------------------------------------------------------|
| CDC37   | Cell Division Cycle 37, HSP90 Cochaperone                | Protein Coding | 50 | GC19M010391 | 1.62809515  | <a href="https://www.genecards.org/cgi-bin/carddisp.pl?gene=CDC37">https://www.genecards.org/cgi-bin/carddisp.pl?gene=CDC37</a>     |
| HOXA9   | Homeobox A9                                              | Protein Coding | 45 | GC07M027162 | 1.626486778 | <a href="https://www.genecards.org/cgi-bin/carddisp.pl?gene=HOXA9">https://www.genecards.org/cgi-bin/carddisp.pl?gene=HOXA9</a>     |
| CAPN2   | Calpain 2                                                | Protein Coding | 54 | GC01P223701 | 1.625161171 | <a href="https://www.genecards.org/cgi-bin/carddisp.pl?gene=CAPN2">https://www.genecards.org/cgi-bin/carddisp.pl?gene=CAPN2</a>     |
| BRD8    | Bromodomain Containing 8                                 | Protein Coding | 45 | GC05M138152 | 1.625022411 | <a href="https://www.genecards.org/cgi-bin/carddisp.pl?gene=BRD8">https://www.genecards.org/cgi-bin/carddisp.pl?gene=BRD8</a>       |
| ASCL1   | Achaete-Scute Family BHLH Transcription Factor 1         | Protein Coding | 50 | GC12P102957 | 1.621473312 | <a href="https://www.genecards.org/cgi-bin/carddisp.pl?gene=ASCL1">https://www.genecards.org/cgi-bin/carddisp.pl?gene=ASCL1</a>     |
| EFNB1   | Ephrin B1                                                | Protein Coding | 52 | GC0XP068828 | 1.620697021 | <a href="https://www.genecards.org/cgi-bin/carddisp.pl?gene=EFNB1">https://www.genecards.org/cgi-bin/carddisp.pl?gene=EFNB1</a>     |
| POU2AF1 | POU Class 2 Homeobox Associating Factor 1                | Protein Coding | 44 | GC11M111352 | 1.620057344 | <a href="https://www.genecards.org/cgi-bin/carddisp.pl?gene=POU2AF1">https://www.genecards.org/cgi-bin/carddisp.pl?gene=POU2AF1</a> |
| HMGN2   | High Mobility Group Nucleosomal Binding Domain 2         | Protein Coding | 46 | GC01P026473 | 1.617171049 | <a href="https://www.genecards.org/cgi-bin/carddisp.pl?gene=HMGN2">https://www.genecards.org/cgi-bin/carddisp.pl?gene=HMGN2</a>     |
| LGALS13 | Galectin 13                                              | Protein Coding | 43 | GC19P039602 | 1.616792679 | <a href="https://www.genecards.org/cgi-bin/carddisp.pl?gene=LGALS13">https://www.genecards.org/cgi-bin/carddisp.pl?gene=LGALS13</a> |
| SULF1   | Sulfatase 1                                              | Protein Coding | 49 | GC08P069466 | 1.616624832 | <a href="https://www.genecards.org/cgi-bin/carddisp.pl?gene=SULF1">https://www.genecards.org/cgi-bin/carddisp.pl?gene=SULF1</a>     |
| FGF4    | Fibroblast Growth Factor 4                               | Protein Coding | 50 | GC11M099886 | 1.614102602 | <a href="https://www.genecards.org/cgi-bin/carddisp.pl?gene=FGF4">https://www.genecards.org/cgi-bin/carddisp.pl?gene=FGF4</a>       |
| AKAP1   | A-Kinase Anchoring Protein 1                             | Protein Coding | 47 | GC17P057085 | 1.612334251 | <a href="https://www.genecards.org/cgi-bin/carddisp.pl?gene=AKAP1">https://www.genecards.org/cgi-bin/carddisp.pl?gene=AKAP1</a>     |
| RYK     | Receptor Like Tyrosine Kinase                            | Protein Coding | 50 | GC03M134065 | 1.611094236 | <a href="https://www.genecards.org/cgi-bin/carddisp.pl?gene=RYK">https://www.genecards.org/cgi-bin/carddisp.pl?gene=RYK</a>         |
| CCNB2   | Cyclin B2                                                | Protein Coding | 51 | GC15P059105 | 1.610750675 | <a href="https://www.genecards.org/cgi-bin/carddisp.pl?gene=CCNB2">https://www.genecards.org/cgi-bin/carddisp.pl?gene=CCNB2</a>     |
| TPPP3   | Tubulin Polymerization Promoting Protein Family Member 3 | Protein Coding | 43 | GC16M067389 | 1.609044194 | <a href="https://www.genecards.org/cgi-bin/carddisp.pl?gene=TPPP3">https://www.genecards.org/cgi-bin/carddisp.pl?gene=TPPP3</a>     |

|         |                                                                                        |                |    |             |             |                                                                                                                                     |
|---------|----------------------------------------------------------------------------------------|----------------|----|-------------|-------------|-------------------------------------------------------------------------------------------------------------------------------------|
| CASP14  | Caspase 14                                                                             | Protein Coding | 53 | GC19P015049 | 1.608549476 | <a href="https://www.genecards.org/cgi-bin/carddisp.pl?gene=CASP14">https://www.genecards.org/cgi-bin/carddisp.pl?gene=CASP14</a>   |
| PTPRB   | Protein Tyrosine Phosphatase Receptor Type B                                           | Protein Coding | 52 | GC12M070516 | 1.608270049 | <a href="https://www.genecards.org/cgi-bin/carddisp.pl?gene=PTPRB">https://www.genecards.org/cgi-bin/carddisp.pl?gene=PTPRB</a>     |
| KCND3   | Potassium Voltage-Gated Channel Subfamily D Member 3                                   | Protein Coding | 53 | GC01M111770 | 1.607928157 | <a href="https://www.genecards.org/cgi-bin/carddisp.pl?gene=KCND3">https://www.genecards.org/cgi-bin/carddisp.pl?gene=KCND3</a>     |
| TOM1    | Target Of Myb1 Membrane Trafficking Protein                                            | Protein Coding | 49 | GC22P035299 | 1.60710144  | <a href="https://www.genecards.org/cgi-bin/carddisp.pl?gene=TOM1">https://www.genecards.org/cgi-bin/carddisp.pl?gene=TOM1</a>       |
| C2CD5   | C2 Calcium Dependent Domain Containing 5                                               | Protein Coding | 40 | GC12M022448 | 1.606956601 | <a href="https://www.genecards.org/cgi-bin/carddisp.pl?gene=C2CD5">https://www.genecards.org/cgi-bin/carddisp.pl?gene=C2CD5</a>     |
| TAC3    | Tachykinin Precursor 3                                                                 | Protein Coding | 50 | GC12M057108 | 1.605289936 | <a href="https://www.genecards.org/cgi-bin/carddisp.pl?gene=TAC3">https://www.genecards.org/cgi-bin/carddisp.pl?gene=TAC3</a>       |
| ERG     | ETS Transcription Factor ERG                                                           | Protein Coding | 53 | GC21M038367 | 1.603666306 | <a href="https://www.genecards.org/cgi-bin/carddisp.pl?gene=ERG">https://www.genecards.org/cgi-bin/carddisp.pl?gene=ERG</a>         |
| EN2     | Engrailed Homeobox 2                                                                   | Protein Coding | 46 | GC07P155459 | 1.602025986 | <a href="https://www.genecards.org/cgi-bin/carddisp.pl?gene=EN2">https://www.genecards.org/cgi-bin/carddisp.pl?gene=EN2</a>         |
| SAG     | S-Antigen Visual Arrestin                                                              | Protein Coding | 51 | GC02P233400 | 1.600292444 | <a href="https://www.genecards.org/cgi-bin/carddisp.pl?gene=SAG">https://www.genecards.org/cgi-bin/carddisp.pl?gene=SAG</a>         |
| KIR3DL1 | Killer Cell Immunoglobulin Like Receptor, Three Ig Domains And Long Cytoplasmic Tail 1 | Protein Coding | 46 | GC19P073503 | 1.599633932 | <a href="https://www.genecards.org/cgi-bin/carddisp.pl?gene=KIR3DL1">https://www.genecards.org/cgi-bin/carddisp.pl?gene=KIR3DL1</a> |
| CHRNA4  | Cholinergic Receptor Nicotinic Alpha 4 Subunit                                         | Protein Coding | 56 | GC20M063343 | 1.597695589 | <a href="https://www.genecards.org/cgi-bin/carddisp.pl?gene=CHRNA4">https://www.genecards.org/cgi-bin/carddisp.pl?gene=CHRNA4</a>   |
| CCL26   | C-C Motif Chemokine Ligand 26                                                          | Protein Coding | 44 | GC07M075769 | 1.596167326 | <a href="https://www.genecards.org/cgi-bin/carddisp.pl?gene=CCL26">https://www.genecards.org/cgi-bin/carddisp.pl?gene=CCL26</a>     |
| RNF41   | Ring Finger Protein 41                                                                 | Protein Coding | 46 | GC12M056202 | 1.593486309 | <a href="https://www.genecards.org/cgi-bin/carddisp.pl?gene=RNF41">https://www.genecards.org/cgi-bin/carddisp.pl?gene=RNF41</a>     |
| TLR5    | Toll Like Receptor 5                                                                   | Protein Coding | 53 | GC01M223109 | 1.591864109 | <a href="https://www.genecards.org/cgi-bin/carddisp.pl?gene=TLR5">https://www.genecards.org/cgi-bin/carddisp.pl?gene=TLR5</a>       |
| PI3     | Peptidase Inhibitor 3                                                                  | Protein Coding | 44 | GC20P045174 | 1.590837479 | <a href="https://www.genecards.org/cgi-bin/carddisp.pl?gene=PI3">https://www.genecards.org/cgi-bin/carddisp.pl?gene=PI3</a>         |

|         |                                                  |                |    |             |             |                                                                                                                                     |
|---------|--------------------------------------------------|----------------|----|-------------|-------------|-------------------------------------------------------------------------------------------------------------------------------------|
| CD209   | CD209 Molecule                                   | Protein Coding | 50 | GC19M007739 | 1.590370893 | <a href="https://www.genecards.org/cgi-bin/carddisp.pl?gene=CD209">https://www.genecards.org/cgi-bin/carddisp.pl?gene=CD209</a>     |
| MVP     | Major Vault Protein                              | Protein Coding | 47 | GC16P042738 | 1.587863684 | <a href="https://www.genecards.org/cgi-bin/carddisp.pl?gene=MVP">https://www.genecards.org/cgi-bin/carddisp.pl?gene=MVP</a>         |
| REG1A   | Regenerating Family Member 1 Alpha               | Protein Coding | 46 | GC02P079120 | 1.587365627 | <a href="https://www.genecards.org/cgi-bin/carddisp.pl?gene=REG1A">https://www.genecards.org/cgi-bin/carddisp.pl?gene=REG1A</a>     |
| TDP1    | Tyrosyl-DNA Phosphodiesterase 1                  | Protein Coding | 51 | GC14P089954 | 1.585007429 | <a href="https://www.genecards.org/cgi-bin/carddisp.pl?gene=TDP1">https://www.genecards.org/cgi-bin/carddisp.pl?gene=TDP1</a>       |
| CHRNA1  | Cholinergic Receptor Nicotinic Alpha 1 Subunit   | Protein Coding | 52 | GC02M174747 | 1.583951354 | <a href="https://www.genecards.org/cgi-bin/carddisp.pl?gene=CHRNA1">https://www.genecards.org/cgi-bin/carddisp.pl?gene=CHRNA1</a>   |
| ANP32A  | Acidic Nuclear Phosphoprotein 32 Family Member A | Protein Coding | 50 | GC15M068778 | 1.581532955 | <a href="https://www.genecards.org/cgi-bin/carddisp.pl?gene=ANP32A">https://www.genecards.org/cgi-bin/carddisp.pl?gene=ANP32A</a>   |
| GAP43   | Growth Associated Protein 43                     | Protein Coding | 50 | GC03P115623 | 1.578776121 | <a href="https://www.genecards.org/cgi-bin/carddisp.pl?gene=GAP43">https://www.genecards.org/cgi-bin/carddisp.pl?gene=GAP43</a>     |
| RBM14   | RNA Binding Motif Protein 14                     | Protein Coding | 45 | GC11P070979 | 1.578552961 | <a href="https://www.genecards.org/cgi-bin/carddisp.pl?gene=RBM14">https://www.genecards.org/cgi-bin/carddisp.pl?gene=RBM14</a>     |
| CSTA    | Cystatin A                                       | Protein Coding | 51 | GC03P122325 | 1.577850103 | <a href="https://www.genecards.org/cgi-bin/carddisp.pl?gene=CSTA">https://www.genecards.org/cgi-bin/carddisp.pl?gene=CSTA</a>       |
| LMTK3   | Lemur Tyrosine Kinase 3                          | Protein Coding | 42 | GC19M048485 | 1.575712204 | <a href="https://www.genecards.org/cgi-bin/carddisp.pl?gene=LMTK3">https://www.genecards.org/cgi-bin/carddisp.pl?gene=LMTK3</a>     |
| SH3KBP1 | SH3 Domain Containing Kinase Binding Protein 1   | Protein Coding | 48 | GC0XM019552 | 1.574989557 | <a href="https://www.genecards.org/cgi-bin/carddisp.pl?gene=SH3KBP1">https://www.genecards.org/cgi-bin/carddisp.pl?gene=SH3KBP1</a> |
| SLIT3   | Slit Guidance Ligand 3                           | Protein Coding | 48 | GC05M168661 | 1.573313236 | <a href="https://www.genecards.org/cgi-bin/carddisp.pl?gene=SLIT3">https://www.genecards.org/cgi-bin/carddisp.pl?gene=SLIT3</a>     |
| WAS     | WASP Actin Nucleation Promoting Factor           | Protein Coding | 55 | GC0XP048676 | 1.572755575 | <a href="https://www.genecards.org/cgi-bin/carddisp.pl?gene=WAS">https://www.genecards.org/cgi-bin/carddisp.pl?gene=WAS</a>         |
| FCGR2B  | Fc Gamma Receptor IIb                            | Protein Coding | 56 | GC01P161823 | 1.570428848 | <a href="https://www.genecards.org/cgi-bin/carddisp.pl?gene=FCGR2B">https://www.genecards.org/cgi-bin/carddisp.pl?gene=FCGR2B</a>   |
| PTPRU   | Protein Tyrosine Phosphatase Receptor Type U     | Protein Coding | 50 | GC01P029236 | 1.567531228 | <a href="https://www.genecards.org/cgi-bin/carddisp.pl?gene=PTPRU">https://www.genecards.org/cgi-bin/carddisp.pl?gene=PTPRU</a>     |

|         |                                                                  |                |    |             |             |                                                                                                                                     |
|---------|------------------------------------------------------------------|----------------|----|-------------|-------------|-------------------------------------------------------------------------------------------------------------------------------------|
| ITSN1   | Intersectin 1                                                    | Protein Coding | 48 | GC21P033642 | 1.564399242 | <a href="https://www.genecards.org/cgi-bin/carddisp.pl?gene=ITSN1">https://www.genecards.org/cgi-bin/carddisp.pl?gene=ITSN1</a>     |
| ABI2    | Abl Interactor 2                                                 | Protein Coding | 45 | GC02P203327 | 1.561905265 | <a href="https://www.genecards.org/cgi-bin/carddisp.pl?gene=ABI2">https://www.genecards.org/cgi-bin/carddisp.pl?gene=ABI2</a>       |
| VAV1    | Vav Guanine Nucleotide Exchange Factor 1                         | Protein Coding | 52 | GC19P006772 | 1.559613466 | <a href="https://www.genecards.org/cgi-bin/carddisp.pl?gene=VAV1">https://www.genecards.org/cgi-bin/carddisp.pl?gene=VAV1</a>       |
| BCL3    | BCL3 Transcription Coactivator                                   | Protein Coding | 48 | GC19P044747 | 1.558552265 | <a href="https://www.genecards.org/cgi-bin/carddisp.pl?gene=BCL3">https://www.genecards.org/cgi-bin/carddisp.pl?gene=BCL3</a>       |
| STATH   | Statherin                                                        | Protein Coding | 38 | GC04P069995 | 1.558440924 | <a href="https://www.genecards.org/cgi-bin/carddisp.pl?gene=STATH">https://www.genecards.org/cgi-bin/carddisp.pl?gene=STATH</a>     |
| TOLLIP  | Toll Interacting Protein                                         | Protein Coding | 51 | GC11M001274 | 1.555968523 | <a href="https://www.genecards.org/cgi-bin/carddisp.pl?gene=TOLLIP">https://www.genecards.org/cgi-bin/carddisp.pl?gene=TOLLIP</a>   |
| IL22RA2 | Interleukin 22 Receptor Subunit Alpha 2                          | Protein Coding | 47 | GC06M137143 | 1.553938866 | <a href="https://www.genecards.org/cgi-bin/carddisp.pl?gene=IL22RA2">https://www.genecards.org/cgi-bin/carddisp.pl?gene=IL22RA2</a> |
| THBS4   | Thrombospondin 4                                                 | Protein Coding | 50 | GC05P079991 | 1.549686193 | <a href="https://www.genecards.org/cgi-bin/carddisp.pl?gene=THBS4">https://www.genecards.org/cgi-bin/carddisp.pl?gene=THBS4</a>     |
| TRPA1   | Transient Receptor Potential Cation Channel Subfamily A Member 1 | Protein Coding | 53 | GC08M072019 | 1.548540115 | <a href="https://www.genecards.org/cgi-bin/carddisp.pl?gene=TRPA1">https://www.genecards.org/cgi-bin/carddisp.pl?gene=TRPA1</a>     |
| S100A10 | S100 Calcium Binding Protein A10                                 | Protein Coding | 50 | GC01M152817 | 1.548104286 | <a href="https://www.genecards.org/cgi-bin/carddisp.pl?gene=S100A10">https://www.genecards.org/cgi-bin/carddisp.pl?gene=S100A10</a> |
| ABL2    | ABL Proto-Oncogene 2, Non-Receptor Tyrosine Kinase               | Protein Coding | 52 | GC01M179143 | 1.548074484 | <a href="https://www.genecards.org/cgi-bin/carddisp.pl?gene=ABL2">https://www.genecards.org/cgi-bin/carddisp.pl?gene=ABL2</a>       |
| PIGF    | Phosphatidylinositol Glycan Anchor Biosynthesis Class F          | Protein Coding | 46 | GC02M046580 | 1.547854424 | <a href="https://www.genecards.org/cgi-bin/carddisp.pl?gene=PIGF">https://www.genecards.org/cgi-bin/carddisp.pl?gene=PIGF</a>       |
| EGR2    | Early Growth Response 2                                          | Protein Coding | 51 | GC10M062811 | 1.542626143 | <a href="https://www.genecards.org/cgi-bin/carddisp.pl?gene=EGR2">https://www.genecards.org/cgi-bin/carddisp.pl?gene=EGR2</a>       |
| ZKSCAN7 | Zinc Finger With KRAB And SCAN Domains 7                         | Protein Coding | 39 | GC03P044556 | 1.539433479 | <a href="https://www.genecards.org/cgi-bin/carddisp.pl?gene=ZKSCAN7">https://www.genecards.org/cgi-bin/carddisp.pl?gene=ZKSCAN7</a> |
| CHRND   | Cholinergic Receptor Nicotinic Delta Subunit                     | Protein Coding | 50 | GC02P232525 | 1.539049506 | <a href="https://www.genecards.org/cgi-bin/carddisp.pl?gene=CHRND">https://www.genecards.org/cgi-bin/carddisp.pl?gene=CHRND</a>     |

|         |                                                  |                |    |             |             |                                                                                                                                     |
|---------|--------------------------------------------------|----------------|----|-------------|-------------|-------------------------------------------------------------------------------------------------------------------------------------|
| ELP3    | Elongator Acetyltransferase Complex Subunit 3    | Protein Coding | 48 | GC08P028089 | 1.538787603 | <a href="https://www.genecards.org/cgi-bin/carddisp.pl?gene=ELP3">https://www.genecards.org/cgi-bin/carddisp.pl?gene=ELP3</a>       |
| FCER1G  | Fc Epsilon Receptor Ig                           | Protein Coding | 48 | GC01P161215 | 1.535698891 | <a href="https://www.genecards.org/cgi-bin/carddisp.pl?gene=FCER1G">https://www.genecards.org/cgi-bin/carddisp.pl?gene=FCER1G</a>   |
| SHB     | SH2 Domain Containing Adaptor Protein B          | Protein Coding | 46 | GC09M040554 | 1.535517454 | <a href="https://www.genecards.org/cgi-bin/carddisp.pl?gene=SHB">https://www.genecards.org/cgi-bin/carddisp.pl?gene=SHB</a>         |
| MSBP2   | Minisatellite Binding Protein 2                  | Protein Coding | 5  | GC00U990214 | 1.533616304 | <a href="https://www.genecards.org/cgi-bin/carddisp.pl?gene=MSBP2">https://www.genecards.org/cgi-bin/carddisp.pl?gene=MSBP2</a>     |
| WNT11   | Wnt Family Member 11                             | Protein Coding | 50 | GC11M076186 | 1.532100201 | <a href="https://www.genecards.org/cgi-bin/carddisp.pl?gene=WNT11">https://www.genecards.org/cgi-bin/carddisp.pl?gene=WNT11</a>     |
| TBXT    | T-Box Transcription Factor T                     | Protein Coding | 50 | GC06M166158 | 1.531953096 | <a href="https://www.genecards.org/cgi-bin/carddisp.pl?gene=TBXT">https://www.genecards.org/cgi-bin/carddisp.pl?gene=TBXT</a>       |
| MAP3K2  | Mitogen-Activated Protein Kinase Kinase Kinase 2 | Protein Coding | 52 | GC02M127298 | 1.531584501 | <a href="https://www.genecards.org/cgi-bin/carddisp.pl?gene=MAP3K2">https://www.genecards.org/cgi-bin/carddisp.pl?gene=MAP3K2</a>   |
| FGFRL1  | Fibroblast Growth Factor Receptor Like 1         | Protein Coding | 50 | GC04P001370 | 1.53033185  | <a href="https://www.genecards.org/cgi-bin/carddisp.pl?gene=FGFRL1">https://www.genecards.org/cgi-bin/carddisp.pl?gene=FGFRL1</a>   |
| CLEC12A | C-Type Lectin Domain Family 12 Member A          | Protein Coding | 46 | GC12P009951 | 1.528077364 | <a href="https://www.genecards.org/cgi-bin/carddisp.pl?gene=CLEC12A">https://www.genecards.org/cgi-bin/carddisp.pl?gene=CLEC12A</a> |
| PTPN9   | Protein Tyrosine Phosphatase Non-Receptor Type 9 | Protein Coding | 46 | GC15M075463 | 1.525749922 | <a href="https://www.genecards.org/cgi-bin/carddisp.pl?gene=PTPN9">https://www.genecards.org/cgi-bin/carddisp.pl?gene=PTPN9</a>     |
| BAIAP2  | BAR/IMD Domain Containing Adaptor Protein 2      | Protein Coding | 48 | GC17P081035 | 1.525718451 | <a href="https://www.genecards.org/cgi-bin/carddisp.pl?gene=BAIAP2">https://www.genecards.org/cgi-bin/carddisp.pl?gene=BAIAP2</a>   |
| CA11    | Carbonic Anhydrase 11                            | Protein Coding | 44 | GC19M070852 | 1.523382664 | <a href="https://www.genecards.org/cgi-bin/carddisp.pl?gene=CA11">https://www.genecards.org/cgi-bin/carddisp.pl?gene=CA11</a>       |
| JPH4    | Junctophilin 4                                   | Protein Coding | 41 | GC14M023568 | 1.521375775 | <a href="https://www.genecards.org/cgi-bin/carddisp.pl?gene=JPH4">https://www.genecards.org/cgi-bin/carddisp.pl?gene=JPH4</a>       |
| GCAT    | Glycine C-Acetyltransferase                      | Protein Coding | 47 | GC22P037807 | 1.521194458 | <a href="https://www.genecards.org/cgi-bin/carddisp.pl?gene=GCAT">https://www.genecards.org/cgi-bin/carddisp.pl?gene=GCAT</a>       |
| PMP22   | Peripheral Myelin Protein 22                     | Protein Coding | 50 | GC17M015229 | 1.517963052 | <a href="https://www.genecards.org/cgi-bin/carddisp.pl?gene=PMP22">https://www.genecards.org/cgi-bin/carddisp.pl?gene=PMP22</a>     |

|        |                                               |                |    |             |             |                                                                                                                                   |
|--------|-----------------------------------------------|----------------|----|-------------|-------------|-----------------------------------------------------------------------------------------------------------------------------------|
| MUC4   | Mucin 4, Cell Surface Associated              | Protein Coding | 47 | GC03M195746 | 1.517698765 | <a href="https://www.genecards.org/cgi-bin/carddisp.pl?gene=MUC4">https://www.genecards.org/cgi-bin/carddisp.pl?gene=MUC4</a>     |
| GAB1   | GRB2 Associated Binding Protein 1             | Protein Coding | 51 | GC04P143336 | 1.514995813 | <a href="https://www.genecards.org/cgi-bin/carddisp.pl?gene=GAB1">https://www.genecards.org/cgi-bin/carddisp.pl?gene=GAB1</a>     |
| FRS2   | Fibroblast Growth Factor Receptor Substrate 2 | Protein Coding | 46 | GC12P069471 | 1.51312685  | <a href="https://www.genecards.org/cgi-bin/carddisp.pl?gene=FRS2">https://www.genecards.org/cgi-bin/carddisp.pl?gene=FRS2</a>     |
| SV2A   | Synaptic Vesicle Glycoprotein 2A              | Protein Coding | 50 | GC01M149903 | 1.510024309 | <a href="https://www.genecards.org/cgi-bin/carddisp.pl?gene=SV2A">https://www.genecards.org/cgi-bin/carddisp.pl?gene=SV2A</a>     |
| MATK   | Megakaryocyte-Associated Tyrosine Kinase      | Protein Coding | 51 | GC19M003777 | 1.509203672 | <a href="https://www.genecards.org/cgi-bin/carddisp.pl?gene=MATK">https://www.genecards.org/cgi-bin/carddisp.pl?gene=MATK</a>     |
| ABI1   | Abl Interactor 1                              | Protein Coding | 50 | GC10M026746 | 1.507948875 | <a href="https://www.genecards.org/cgi-bin/carddisp.pl?gene=ABI1">https://www.genecards.org/cgi-bin/carddisp.pl?gene=ABI1</a>     |
| SCYL1  | SCY1 Like Pseudokinase 1                      | Protein Coding | 49 | GC11P065525 | 1.507302999 | <a href="https://www.genecards.org/cgi-bin/carddisp.pl?gene=SCYL1">https://www.genecards.org/cgi-bin/carddisp.pl?gene=SCYL1</a>   |
| CD22   | CD22 Molecule                                 | Protein Coding | 53 | GC19P035319 | 1.507148862 | <a href="https://www.genecards.org/cgi-bin/carddisp.pl?gene=CD22">https://www.genecards.org/cgi-bin/carddisp.pl?gene=CD22</a>     |
| SNX9   | Sorting Nexin 9                               | Protein Coding | 47 | GC06P157702 | 1.507115602 | <a href="https://www.genecards.org/cgi-bin/carddisp.pl?gene=SNX9">https://www.genecards.org/cgi-bin/carddisp.pl?gene=SNX9</a>     |
| ZYX    | Zyxin                                         | Protein Coding | 52 | GC07P143381 | 1.506281376 | <a href="https://www.genecards.org/cgi-bin/carddisp.pl?gene=ZYX">https://www.genecards.org/cgi-bin/carddisp.pl?gene=ZYX</a>       |
| DUSP13 | Dual Specificity Phosphatase 13               | Protein Coding | 45 | GC10M075094 | 1.505273819 | <a href="https://www.genecards.org/cgi-bin/carddisp.pl?gene=DUSP13">https://www.genecards.org/cgi-bin/carddisp.pl?gene=DUSP13</a> |
| PDPN   | Podoplanin                                    | Protein Coding | 48 | GC01P013583 | 1.504307032 | <a href="https://www.genecards.org/cgi-bin/carddisp.pl?gene=PDPN">https://www.genecards.org/cgi-bin/carddisp.pl?gene=PDPN</a>     |
| FKBP5  | FKBP Prolyl Isomerase 5                       | Protein Coding | 56 | GC06M071862 | 1.503385782 | <a href="https://www.genecards.org/cgi-bin/carddisp.pl?gene=FKBP5">https://www.genecards.org/cgi-bin/carddisp.pl?gene=FKBP5</a>   |
| HECTD2 | HECT Domain E3 Ubiquitin Protein Ligase 2     | Protein Coding | 42 | GC10P091409 | 1.502227306 | <a href="https://www.genecards.org/cgi-bin/carddisp.pl?gene=HECTD2">https://www.genecards.org/cgi-bin/carddisp.pl?gene=HECTD2</a> |
| SPN    | Sialophorin                                   | Protein Coding | 47 | GC16P029662 | 1.501608849 | <a href="https://www.genecards.org/cgi-bin/carddisp.pl?gene=SPN">https://www.genecards.org/cgi-bin/carddisp.pl?gene=SPN</a>       |

|         |                                                        |                |    |             |             |                                                                                                                                     |
|---------|--------------------------------------------------------|----------------|----|-------------|-------------|-------------------------------------------------------------------------------------------------------------------------------------|
| TNR     | Tenascin R                                             | Protein Coding | 50 | GC01M175291 | 1.499696016 | <a href="https://www.genecards.org/cgi-bin/carddisp.pl?gene=TNR">https://www.genecards.org/cgi-bin/carddisp.pl?gene=TNR</a>         |
| KTI12   | KTI12 Chromatin Associated Homolog                     | Protein Coding | 36 | GC01M052032 | 1.497702956 | <a href="https://www.genecards.org/cgi-bin/carddisp.pl?gene=KTI12">https://www.genecards.org/cgi-bin/carddisp.pl?gene=KTI12</a>     |
| MED30   | Mediator Complex Subunit 30                            | Protein Coding | 43 | GC08P117521 | 1.497054815 | <a href="https://www.genecards.org/cgi-bin/carddisp.pl?gene=MED30">https://www.genecards.org/cgi-bin/carddisp.pl?gene=MED30</a>     |
| RNASE1  | Ribonuclease A Family Member 1, Pancreatic             | Protein Coding | 48 | GC14M020801 | 1.49683392  | <a href="https://www.genecards.org/cgi-bin/carddisp.pl?gene=RNASE1">https://www.genecards.org/cgi-bin/carddisp.pl?gene=RNASE1</a>   |
| P2RX3   | Purinergic Receptor P2X 3                              | Protein Coding | 50 | GC11P057356 | 1.494965792 | <a href="https://www.genecards.org/cgi-bin/carddisp.pl?gene=P2RX3">https://www.genecards.org/cgi-bin/carddisp.pl?gene=P2RX3</a>     |
| FYB1    | FYN Binding Protein 1                                  | Protein Coding | 50 | GC05M039105 | 1.491333246 | <a href="https://www.genecards.org/cgi-bin/carddisp.pl?gene=FYB1">https://www.genecards.org/cgi-bin/carddisp.pl?gene=FYB1</a>       |
| TGFB111 | Transforming Growth Factor Beta 1 Induced Transcript 1 | Protein Coding | 48 | GC16P042867 | 1.490437984 | <a href="https://www.genecards.org/cgi-bin/carddisp.pl?gene=TGFB111">https://www.genecards.org/cgi-bin/carddisp.pl?gene=TGFB111</a> |
| ACKR1   | Atypical Chemokine Receptor 1 (Duffy Blood Group)      | Protein Coding | 48 | GC01P159203 | 1.488973379 | <a href="https://www.genecards.org/cgi-bin/carddisp.pl?gene=ACKR1">https://www.genecards.org/cgi-bin/carddisp.pl?gene=ACKR1</a>     |
| PTK7    | Protein Tyrosine Kinase 7 (Inactive)                   | Protein Coding | 52 | GC06P043076 | 1.488434076 | <a href="https://www.genecards.org/cgi-bin/carddisp.pl?gene=PTK7">https://www.genecards.org/cgi-bin/carddisp.pl?gene=PTK7</a>       |
| CHRNA2  | Cholinergic Receptor Nicotinic Beta 2 Subunit          | Protein Coding | 53 | GC01P154568 | 1.48781085  | <a href="https://www.genecards.org/cgi-bin/carddisp.pl?gene=CHRNA2">https://www.genecards.org/cgi-bin/carddisp.pl?gene=CHRNA2</a>   |
| CTSW    | Cathepsin W                                            | Protein Coding | 43 | GC11P065879 | 1.486487627 | <a href="https://www.genecards.org/cgi-bin/carddisp.pl?gene=CTSW">https://www.genecards.org/cgi-bin/carddisp.pl?gene=CTSW</a>       |
| CCR4    | C-C Motif Chemokine Receptor 4                         | Protein Coding | 51 | GC03P032951 | 1.486412525 | <a href="https://www.genecards.org/cgi-bin/carddisp.pl?gene=CCR4">https://www.genecards.org/cgi-bin/carddisp.pl?gene=CCR4</a>       |
| TRIP6   | Thyroid Hormone Receptor Interactor 6                  | Protein Coding | 46 | GC07P100867 | 1.486283898 | <a href="https://www.genecards.org/cgi-bin/carddisp.pl?gene=TRIP6">https://www.genecards.org/cgi-bin/carddisp.pl?gene=TRIP6</a>     |
| MPP1    | MAGUK P55 Scaffold Protein 1                           | Protein Coding | 46 | GC0XM154779 | 1.485907793 | <a href="https://www.genecards.org/cgi-bin/carddisp.pl?gene=MPP1">https://www.genecards.org/cgi-bin/carddisp.pl?gene=MPP1</a>       |
| GLRA1   | Glycine Receptor Alpha 1                               | Protein Coding | 53 | GC05M151822 | 1.483913183 | <a href="https://www.genecards.org/cgi-bin/carddisp.pl?gene=GLRA1">https://www.genecards.org/cgi-bin/carddisp.pl?gene=GLRA1</a>     |

|         |                                                         |                |    |             |             |                                                                                                                                     |
|---------|---------------------------------------------------------|----------------|----|-------------|-------------|-------------------------------------------------------------------------------------------------------------------------------------|
| EIF4H   | Eukaryotic Translation Initiation Factor 4H             | Protein Coding | 48 | GC07P074174 | 1.483606577 | <a href="https://www.genecards.org/cgi-bin/carddisp.pl?gene=EIF4H">https://www.genecards.org/cgi-bin/carddisp.pl?gene=EIF4H</a>     |
| HDAC8   | Histone Deacetylase 8                                   | Protein Coding | 55 | GC0XM072329 | 1.483047009 | <a href="https://www.genecards.org/cgi-bin/carddisp.pl?gene=HDAC8">https://www.genecards.org/cgi-bin/carddisp.pl?gene=HDAC8</a>     |
| MAP4K2  | Mitogen-Activated Protein Kinase Kinase Kinase Kinase 2 | Protein Coding | 53 | GC11M099661 | 1.471613169 | <a href="https://www.genecards.org/cgi-bin/carddisp.pl?gene=MAP4K2">https://www.genecards.org/cgi-bin/carddisp.pl?gene=MAP4K2</a>   |
| MRPL28  | Mitochondrial Ribosomal Protein L28                     | Protein Coding | 43 | GC16M000366 | 1.47159481  | <a href="https://www.genecards.org/cgi-bin/carddisp.pl?gene=MRPL28">https://www.genecards.org/cgi-bin/carddisp.pl?gene=MRPL28</a>   |
| AQP5    | Aquaporin 5                                             | Protein Coding | 53 | GC12P049961 | 1.471539617 | <a href="https://www.genecards.org/cgi-bin/carddisp.pl?gene=AQP5">https://www.genecards.org/cgi-bin/carddisp.pl?gene=AQP5</a>       |
| PPP2R3A | Protein Phosphatase 2 Regulatory Subunit B"Alpha        | Protein Coding | 43 | GC03P135965 | 1.46496439  | <a href="https://www.genecards.org/cgi-bin/carddisp.pl?gene=PPP2R3A">https://www.genecards.org/cgi-bin/carddisp.pl?gene=PPP2R3A</a> |
| TRIM22  | Tripartite Motif Containing 22                          | Protein Coding | 46 | GC11P005689 | 1.461960793 | <a href="https://www.genecards.org/cgi-bin/carddisp.pl?gene=TRIM22">https://www.genecards.org/cgi-bin/carddisp.pl?gene=TRIM22</a>   |
| SIT1    | Signaling Threshold Regulating Transmembrane Adaptor 1  | Protein Coding | 43 | GC09M035640 | 1.460095882 | <a href="https://www.genecards.org/cgi-bin/carddisp.pl?gene=SIT1">https://www.genecards.org/cgi-bin/carddisp.pl?gene=SIT1</a>       |
| PDIA2   | Protein Disulfide Isomerase Family A Member 2           | Protein Coding | 48 | GC16P013436 | 1.459900379 | <a href="https://www.genecards.org/cgi-bin/carddisp.pl?gene=PDIA2">https://www.genecards.org/cgi-bin/carddisp.pl?gene=PDIA2</a>     |
| ETV1    | ETS Variant Transcription Factor 1                      | Protein Coding | 51 | GC07M013891 | 1.45987165  | <a href="https://www.genecards.org/cgi-bin/carddisp.pl?gene=ETV1">https://www.genecards.org/cgi-bin/carddisp.pl?gene=ETV1</a>       |
| VEGFD   | Vascular Endothelial Growth Factor D                    | Protein Coding | 47 | GC0XM015345 | 1.458869696 | <a href="https://www.genecards.org/cgi-bin/carddisp.pl?gene=VEGFD">https://www.genecards.org/cgi-bin/carddisp.pl?gene=VEGFD</a>     |
| LRIG1   | Leucine Rich Repeats And Immunoglobulin Like Domains 1  | Protein Coding | 49 | GC03M066379 | 1.458433747 | <a href="https://www.genecards.org/cgi-bin/carddisp.pl?gene=LRIG1">https://www.genecards.org/cgi-bin/carddisp.pl?gene=LRIG1</a>     |
| ACTR3   | Actin Related Protein 3                                 | Protein Coding | 47 | GC02P113889 | 1.458372474 | <a href="https://www.genecards.org/cgi-bin/carddisp.pl?gene=ACTR3">https://www.genecards.org/cgi-bin/carddisp.pl?gene=ACTR3</a>     |
| PTPRK   | Protein Tyrosine Phosphatase Receptor Type K            | Protein Coding | 51 | GC06M127949 | 1.45528698  | <a href="https://www.genecards.org/cgi-bin/carddisp.pl?gene=PTPRK">https://www.genecards.org/cgi-bin/carddisp.pl?gene=PTPRK</a>     |
| DCTN2   | Dynactin Subunit 2                                      | Protein Coding | 47 | GC12M057771 | 1.454296112 | <a href="https://www.genecards.org/cgi-bin/carddisp.pl?gene=DCTN2">https://www.genecards.org/cgi-bin/carddisp.pl?gene=DCTN2</a>     |

|         |                                                      |                |    |             |             |                                                                                                                                     |
|---------|------------------------------------------------------|----------------|----|-------------|-------------|-------------------------------------------------------------------------------------------------------------------------------------|
| TDGF1   | Teratocarcinoma-Derived Growth Factor 1              | Protein Coding | 49 | GC03P047633 | 1.454260468 | <a href="https://www.genecards.org/cgi-bin/carddisp.pl?gene=TDGF1">https://www.genecards.org/cgi-bin/carddisp.pl?gene=TDGF1</a>     |
| TEC     | Tec Protein Tyrosine Kinase                          | Protein Coding | 52 | GC04M048177 | 1.453444481 | <a href="https://www.genecards.org/cgi-bin/carddisp.pl?gene=TEC">https://www.genecards.org/cgi-bin/carddisp.pl?gene=TEC</a>         |
| EIF3B   | Eukaryotic Translation Initiation Factor 3 Subunit B | Protein Coding | 45 | GC07P002354 | 1.452422142 | <a href="https://www.genecards.org/cgi-bin/carddisp.pl?gene=EIF3B">https://www.genecards.org/cgi-bin/carddisp.pl?gene=EIF3B</a>     |
| NRGN    | Neurogranin                                          | Protein Coding | 44 | GC11P124739 | 1.450027466 | <a href="https://www.genecards.org/cgi-bin/carddisp.pl?gene=NRGN">https://www.genecards.org/cgi-bin/carddisp.pl?gene=NRGN</a>       |
| FIP1L1  | Factor Interacting With PAPOLA And CPSF1             | Protein Coding | 47 | GC04P053435 | 1.449950576 | <a href="https://www.genecards.org/cgi-bin/carddisp.pl?gene=FIP1L1">https://www.genecards.org/cgi-bin/carddisp.pl?gene=FIP1L1</a>   |
| EFNA3   | Ephrin A3                                            | Protein Coding | 51 | GC01P155078 | 1.446974158 | <a href="https://www.genecards.org/cgi-bin/carddisp.pl?gene=EFNA3">https://www.genecards.org/cgi-bin/carddisp.pl?gene=EFNA3</a>     |
| GLI2    | GLI Family Zinc Finger 2                             | Protein Coding | 56 | GC02P120735 | 1.444097519 | <a href="https://www.genecards.org/cgi-bin/carddisp.pl?gene=GLI2">https://www.genecards.org/cgi-bin/carddisp.pl?gene=GLI2</a>       |
| CIT     | Citron Rho-Interacting Serine/Threonine Kinase       | Protein Coding | 54 | GC12M119687 | 1.443084955 | <a href="https://www.genecards.org/cgi-bin/carddisp.pl?gene=CIT">https://www.genecards.org/cgi-bin/carddisp.pl?gene=CIT</a>         |
| KIFAP3  | Kinesin Associated Protein 3                         | Protein Coding | 46 | GC01M169921 | 1.442029834 | <a href="https://www.genecards.org/cgi-bin/carddisp.pl?gene=KIFAP3">https://www.genecards.org/cgi-bin/carddisp.pl?gene=KIFAP3</a>   |
| GJB2    | Gap Junction Protein Beta 2                          | Protein Coding | 52 | GC13M020187 | 1.441787243 | <a href="https://www.genecards.org/cgi-bin/carddisp.pl?gene=GJB2">https://www.genecards.org/cgi-bin/carddisp.pl?gene=GJB2</a>       |
| KAT7    | Lysine Acetyltransferase 7                           | Protein Coding | 49 | GC17P049788 | 1.440423012 | <a href="https://www.genecards.org/cgi-bin/carddisp.pl?gene=KAT7">https://www.genecards.org/cgi-bin/carddisp.pl?gene=KAT7</a>       |
| DOK1    | Docking Protein 1                                    | Protein Coding | 50 | GC02P074549 | 1.440416574 | <a href="https://www.genecards.org/cgi-bin/carddisp.pl?gene=DOK1">https://www.genecards.org/cgi-bin/carddisp.pl?gene=DOK1</a>       |
| MIR26A2 | MicroRNA 26a-2                                       | RNA Gene       | 22 | GC12M057824 | 1.43974936  | <a href="https://www.genecards.org/cgi-bin/carddisp.pl?gene=MIR26A2">https://www.genecards.org/cgi-bin/carddisp.pl?gene=MIR26A2</a> |
| RDX     | Radixin                                              | Protein Coding | 53 | GC11M109864 | 1.43893826  | <a href="https://www.genecards.org/cgi-bin/carddisp.pl?gene=RDX">https://www.genecards.org/cgi-bin/carddisp.pl?gene=RDX</a>         |
| CLUH    | Clustered Mitochondria Homolog                       | Protein Coding | 43 | GC17M002689 | 1.43893826  | <a href="https://www.genecards.org/cgi-bin/carddisp.pl?gene=CLUH">https://www.genecards.org/cgi-bin/carddisp.pl?gene=CLUH</a>       |

|       |                                                        |                |    |             |             |                                                                                                                                 |
|-------|--------------------------------------------------------|----------------|----|-------------|-------------|---------------------------------------------------------------------------------------------------------------------------------|
| PTPRG | Protein Tyrosine Phosphatase Receptor Type G           | Protein Coding | 51 | GC03P061561 | 1.437517405 | <a href="https://www.genecards.org/cgi-bin/carddisp.pl?gene=PTPRG">https://www.genecards.org/cgi-bin/carddisp.pl?gene=PTPRG</a> |
| TRMT6 | TRNA Methyltransferase 6 Non-Catalytic Subunit         | Protein Coding | 40 | GC20M005937 | 1.436141014 | <a href="https://www.genecards.org/cgi-bin/carddisp.pl?gene=TRMT6">https://www.genecards.org/cgi-bin/carddisp.pl?gene=TRMT6</a> |
| FOSB  | FosB Proto-Oncogene, AP-1 Transcription Factor Subunit | Protein Coding | 49 | GC19P045467 | 1.435516    | <a href="https://www.genecards.org/cgi-bin/carddisp.pl?gene=FOSB">https://www.genecards.org/cgi-bin/carddisp.pl?gene=FOSB</a>   |
| EFNA2 | Ephrin A2                                              | Protein Coding | 48 | GC19P003719 | 1.432334781 | <a href="https://www.genecards.org/cgi-bin/carddisp.pl?gene=EFNA2">https://www.genecards.org/cgi-bin/carddisp.pl?gene=EFNA2</a> |
| HEMK1 | HemK Methyltransferase Family Member 1                 | Protein Coding | 42 | GC03P050569 | 1.430846691 | <a href="https://www.genecards.org/cgi-bin/carddisp.pl?gene=HEMK1">https://www.genecards.org/cgi-bin/carddisp.pl?gene=HEMK1</a> |
| CLCF1 | Cardiotrophin Like Cytokine Factor 1                   | Protein Coding | 49 | GC11M067364 | 1.427292824 | <a href="https://www.genecards.org/cgi-bin/carddisp.pl?gene=CLCF1">https://www.genecards.org/cgi-bin/carddisp.pl?gene=CLCF1</a> |
| CEBPZ | CCAAT Enhancer Binding Protein Zeta                    | Protein Coding | 46 | GC02M037201 | 1.425809264 | <a href="https://www.genecards.org/cgi-bin/carddisp.pl?gene=CEBPZ">https://www.genecards.org/cgi-bin/carddisp.pl?gene=CEBPZ</a> |
| CRIP1 | Cysteine Rich Protein 1                                | Protein Coding | 43 | GC14P105486 | 1.425279856 | <a href="https://www.genecards.org/cgi-bin/carddisp.pl?gene=CRIP1">https://www.genecards.org/cgi-bin/carddisp.pl?gene=CRIP1</a> |
| ICAM2 | Intercellular Adhesion Molecule 2                      | Protein Coding | 51 | GC17M064002 | 1.424790382 | <a href="https://www.genecards.org/cgi-bin/carddisp.pl?gene=ICAM2">https://www.genecards.org/cgi-bin/carddisp.pl?gene=ICAM2</a> |
| PTK6  | Protein Tyrosine Kinase 6                              | Protein Coding | 54 | GC20M063528 | 1.424619913 | <a href="https://www.genecards.org/cgi-bin/carddisp.pl?gene=PTK6">https://www.genecards.org/cgi-bin/carddisp.pl?gene=PTK6</a>   |
| RGS19 | Regulator Of G Protein Signaling 19                    | Protein Coding | 48 | GC20M064073 | 1.423856258 | <a href="https://www.genecards.org/cgi-bin/carddisp.pl?gene=RGS19">https://www.genecards.org/cgi-bin/carddisp.pl?gene=RGS19</a> |
| CALD1 | Caldesmon 1                                            | Protein Coding | 50 | GC07P134744 | 1.423612356 | <a href="https://www.genecards.org/cgi-bin/carddisp.pl?gene=CALD1">https://www.genecards.org/cgi-bin/carddisp.pl?gene=CALD1</a> |
| CTRB1 | Chymotrypsinogen B1                                    | Protein Coding | 44 | GC16P075218 | 1.420039415 | <a href="https://www.genecards.org/cgi-bin/carddisp.pl?gene=CTRB1">https://www.genecards.org/cgi-bin/carddisp.pl?gene=CTRB1</a> |
| SIRPA | Signal Regulatory Protein Alpha                        | Protein Coding | 52 | GC20P001894 | 1.419333458 | <a href="https://www.genecards.org/cgi-bin/carddisp.pl?gene=SIRPA">https://www.genecards.org/cgi-bin/carddisp.pl?gene=SIRPA</a> |
| NDN   | Necdin, MAGE Family Member                             | Protein Coding | 48 | GC15M024541 | 1.415067673 | <a href="https://www.genecards.org/cgi-bin/carddisp.pl?gene=NDN">https://www.genecards.org/cgi-bin/carddisp.pl?gene=NDN</a>     |

|         |                                                |                |    |             |             |                                                                                                                                     |
|---------|------------------------------------------------|----------------|----|-------------|-------------|-------------------------------------------------------------------------------------------------------------------------------------|
| UBE2E2  | Ubiquitin Conjugating Enzyme E2 E2             | Protein Coding | 46 | GC03P023221 | 1.414947867 | <a href="https://www.genecards.org/cgi-bin/carddisp.pl?gene=UBE2E2">https://www.genecards.org/cgi-bin/carddisp.pl?gene=UBE2E2</a>   |
| CDY1    | Chromodomain Y-Linked 1                        | Protein Coding | 35 | GC0YP026181 | 1.41431427  | <a href="https://www.genecards.org/cgi-bin/carddisp.pl?gene=CDY1">https://www.genecards.org/cgi-bin/carddisp.pl?gene=CDY1</a>       |
| HECA    | Hdc Homolog, Cell Cycle Regulator              | Protein Coding | 39 | GC06P139135 | 1.412382364 | <a href="https://www.genecards.org/cgi-bin/carddisp.pl?gene=HECA">https://www.genecards.org/cgi-bin/carddisp.pl?gene=HECA</a>       |
| S1PR3   | Sphingosine-1-Phosphate Receptor 3             | Protein Coding | 52 | GC09P089518 | 1.411020994 | <a href="https://www.genecards.org/cgi-bin/carddisp.pl?gene=S1PR3">https://www.genecards.org/cgi-bin/carddisp.pl?gene=S1PR3</a>     |
| ID1     | Inhibitor Of DNA Binding 1                     | Protein Coding | 47 | GC20P031605 | 1.410467505 | <a href="https://www.genecards.org/cgi-bin/carddisp.pl?gene=ID1">https://www.genecards.org/cgi-bin/carddisp.pl?gene=ID1</a>         |
| SLC38A5 | Solute Carrier Family 38 Member 5              | Protein Coding | 44 | GC0XM048458 | 1.409354568 | <a href="https://www.genecards.org/cgi-bin/carddisp.pl?gene=SLC38A5">https://www.genecards.org/cgi-bin/carddisp.pl?gene=SLC38A5</a> |
| CCDC6   | Coiled-Coil Domain Containing 6                | Protein Coding | 47 | GC10M059788 | 1.406749368 | <a href="https://www.genecards.org/cgi-bin/carddisp.pl?gene=CCDC6">https://www.genecards.org/cgi-bin/carddisp.pl?gene=CCDC6</a>     |
| TIRAP   | TIR Domain Containing Adaptor Protein          | Protein Coding | 50 | GC11P126284 | 1.405854225 | <a href="https://www.genecards.org/cgi-bin/carddisp.pl?gene=TIRAP">https://www.genecards.org/cgi-bin/carddisp.pl?gene=TIRAP</a>     |
| ADAD1   | Adenosine Deaminase Domain Containing 1        | Protein Coding | 41 | GC04P122378 | 1.405854225 | <a href="https://www.genecards.org/cgi-bin/carddisp.pl?gene=ADAD1">https://www.genecards.org/cgi-bin/carddisp.pl?gene=ADAD1</a>     |
| GLYATL2 | Glycine-N-Acyltransferase Like 2               | Protein Coding | 38 | GC11M099448 | 1.405657053 | <a href="https://www.genecards.org/cgi-bin/carddisp.pl?gene=GLYATL2">https://www.genecards.org/cgi-bin/carddisp.pl?gene=GLYATL2</a> |
| GOLGA5  | Golgin A5                                      | Protein Coding | 44 | GC14P092794 | 1.404361129 | <a href="https://www.genecards.org/cgi-bin/carddisp.pl?gene=GOLGA5">https://www.genecards.org/cgi-bin/carddisp.pl?gene=GOLGA5</a>   |
| CXCL2   | C-X-C Motif Chemokine Ligand 2                 | Protein Coding | 46 | GC04M074097 | 1.401093721 | <a href="https://www.genecards.org/cgi-bin/carddisp.pl?gene=CXCL2">https://www.genecards.org/cgi-bin/carddisp.pl?gene=CXCL2</a>     |
| INSRR   | Insulin Receptor Related Receptor              | Protein Coding | 50 | GC01M156840 | 1.400798559 | <a href="https://www.genecards.org/cgi-bin/carddisp.pl?gene=INSRR">https://www.genecards.org/cgi-bin/carddisp.pl?gene=INSRR</a>     |
| UGT2A3  | UDP Glucuronosyltransferase Family 2 Member A3 | Protein Coding | 44 | GC04M068928 | 1.396822453 | <a href="https://www.genecards.org/cgi-bin/carddisp.pl?gene=UGT2A3">https://www.genecards.org/cgi-bin/carddisp.pl?gene=UGT2A3</a>   |
| GJB1    | Gap Junction Protein Beta 1                    | Protein Coding | 53 | GC0XP071212 | 1.396408558 | <a href="https://www.genecards.org/cgi-bin/carddisp.pl?gene=GJB1">https://www.genecards.org/cgi-bin/carddisp.pl?gene=GJB1</a>       |

|         |                                                 |                |    |             |             |                                                                                                                                     |
|---------|-------------------------------------------------|----------------|----|-------------|-------------|-------------------------------------------------------------------------------------------------------------------------------------|
| AZU1    | Azurocidin 1                                    | Protein Coding | 46 | GC19P000825 | 1.392551899 | <a href="https://www.genecards.org/cgi-bin/carddisp.pl?gene=AZU1">https://www.genecards.org/cgi-bin/carddisp.pl?gene=AZU1</a>       |
| LILRB2  | Leukocyte Immunoglobulin Like Receptor B2       | Protein Coding | 46 | GC19M071132 | 1.392198324 | <a href="https://www.genecards.org/cgi-bin/carddisp.pl?gene=LILRB2">https://www.genecards.org/cgi-bin/carddisp.pl?gene=LILRB2</a>   |
| PHOX2A  | Paired Like Homeobox 2A                         | Protein Coding | 48 | GC11M072239 | 1.391584873 | <a href="https://www.genecards.org/cgi-bin/carddisp.pl?gene=PHOX2A">https://www.genecards.org/cgi-bin/carddisp.pl?gene=PHOX2A</a>   |
| ADARB1  | Adenosine Deaminase RNA Specific B1             | Protein Coding | 51 | GC21P045073 | 1.391404986 | <a href="https://www.genecards.org/cgi-bin/carddisp.pl?gene=ADARB1">https://www.genecards.org/cgi-bin/carddisp.pl?gene=ADARB1</a>   |
| CD160   | CD160 Molecule                                  | Protein Coding | 48 | GC01P145719 | 1.386499882 | <a href="https://www.genecards.org/cgi-bin/carddisp.pl?gene=CD160">https://www.genecards.org/cgi-bin/carddisp.pl?gene=CD160</a>     |
| CD226   | CD226 Molecule                                  | Protein Coding | 48 | GC18M069831 | 1.386499882 | <a href="https://www.genecards.org/cgi-bin/carddisp.pl?gene=CD226">https://www.genecards.org/cgi-bin/carddisp.pl?gene=CD226</a>     |
| FLT3LG  | Fms Related Receptor Tyrosine Kinase 3 Ligand   | Protein Coding | 46 | GC19P073231 | 1.38465929  | <a href="https://www.genecards.org/cgi-bin/carddisp.pl?gene=FLT3LG">https://www.genecards.org/cgi-bin/carddisp.pl?gene=FLT3LG</a>   |
| SNX13   | Sorting Nexin 13                                | Protein Coding | 43 | GC07M017798 | 1.38465929  | <a href="https://www.genecards.org/cgi-bin/carddisp.pl?gene=SNX13">https://www.genecards.org/cgi-bin/carddisp.pl?gene=SNX13</a>     |
| PTPRH   | Protein Tyrosine Phosphatase Receptor Type H    | Protein Coding | 46 | GC19M055181 | 1.382741332 | <a href="https://www.genecards.org/cgi-bin/carddisp.pl?gene=PTPRH">https://www.genecards.org/cgi-bin/carddisp.pl?gene=PTPRH</a>     |
| CLDN4   | Claudin 4                                       | Protein Coding | 46 | GC07P073799 | 1.380390525 | <a href="https://www.genecards.org/cgi-bin/carddisp.pl?gene=CLDN4">https://www.genecards.org/cgi-bin/carddisp.pl?gene=CLDN4</a>     |
| GET1    | Guided Entry Of Tail-Anchored Proteins Factor 1 | Protein Coding | 41 | GC21P039377 | 1.379169941 | <a href="https://www.genecards.org/cgi-bin/carddisp.pl?gene=GET1">https://www.genecards.org/cgi-bin/carddisp.pl?gene=GET1</a>       |
| MFAP2   | Microfibril Associated Protein 2                | Protein Coding | 47 | GC01M016974 | 1.378049135 | <a href="https://www.genecards.org/cgi-bin/carddisp.pl?gene=MFAP2">https://www.genecards.org/cgi-bin/carddisp.pl?gene=MFAP2</a>     |
| CASQ2   | Calsequestrin 2                                 | Protein Coding | 51 | GC01M115700 | 1.377944827 | <a href="https://www.genecards.org/cgi-bin/carddisp.pl?gene=CASQ2">https://www.genecards.org/cgi-bin/carddisp.pl?gene=CASQ2</a>     |
| ANXA4   | Annexin A4                                      | Protein Coding | 48 | GC02P069644 | 1.377457976 | <a href="https://www.genecards.org/cgi-bin/carddisp.pl?gene=ANXA4">https://www.genecards.org/cgi-bin/carddisp.pl?gene=ANXA4</a>     |
| TMPRSS2 | Transmembrane Serine Protease 2                 | Protein Coding | 55 | GC21M041464 | 1.37644577  | <a href="https://www.genecards.org/cgi-bin/carddisp.pl?gene=TMPRSS2">https://www.genecards.org/cgi-bin/carddisp.pl?gene=TMPRSS2</a> |

|         |                                                              |                |    |             |             |                                                                                                                                     |
|---------|--------------------------------------------------------------|----------------|----|-------------|-------------|-------------------------------------------------------------------------------------------------------------------------------------|
| MYBL2   | MYB Proto-Oncogene Like 2                                    | Protein Coding | 49 | GC20P043667 | 1.375777125 | <a href="https://www.genecards.org/cgi-bin/carddisp.pl?gene=MYBL2">https://www.genecards.org/cgi-bin/carddisp.pl?gene=MYBL2</a>     |
| ERC1    | ELKS/RAB6-Interacting/CAST Family Member 1                   | Protein Coding | 48 | GC12P000972 | 1.375777125 | <a href="https://www.genecards.org/cgi-bin/carddisp.pl?gene=ERC1">https://www.genecards.org/cgi-bin/carddisp.pl?gene=ERC1</a>       |
| RASA2   | RAS P21 Protein Activator 2                                  | Protein Coding | 46 | GC03P141487 | 1.37325263  | <a href="https://www.genecards.org/cgi-bin/carddisp.pl?gene=RASA2">https://www.genecards.org/cgi-bin/carddisp.pl?gene=RASA2</a>     |
| CD244   | CD244 Molecule                                               | Protein Coding | 50 | GC01M160830 | 1.372381926 | <a href="https://www.genecards.org/cgi-bin/carddisp.pl?gene=CD244">https://www.genecards.org/cgi-bin/carddisp.pl?gene=CD244</a>     |
| GTF2B   | General Transcription Factor IIB                             | Protein Coding | 47 | GC01M088853 | 1.372071028 | <a href="https://www.genecards.org/cgi-bin/carddisp.pl?gene=GTF2B">https://www.genecards.org/cgi-bin/carddisp.pl?gene=GTF2B</a>     |
| GFRA1   | GDNF Family Receptor Alpha 1                                 | Protein Coding | 53 | GC10M116056 | 1.371281862 | <a href="https://www.genecards.org/cgi-bin/carddisp.pl?gene=GFRA1">https://www.genecards.org/cgi-bin/carddisp.pl?gene=GFRA1</a>     |
| BAG1    | BAG Cochaperone 1                                            | Protein Coding | 47 | GC09M033245 | 1.370138407 | <a href="https://www.genecards.org/cgi-bin/carddisp.pl?gene=BAG1">https://www.genecards.org/cgi-bin/carddisp.pl?gene=BAG1</a>       |
| CDC25B  | Cell Division Cycle 25B                                      | Protein Coding | 52 | GC20P004512 | 1.369985104 | <a href="https://www.genecards.org/cgi-bin/carddisp.pl?gene=CDC25B">https://www.genecards.org/cgi-bin/carddisp.pl?gene=CDC25B</a>   |
| DEFB4A  | Defensin Beta 4A                                             | Protein Coding | 42 | GC08P007900 | 1.367897034 | <a href="https://www.genecards.org/cgi-bin/carddisp.pl?gene=DEFB4A">https://www.genecards.org/cgi-bin/carddisp.pl?gene=DEFB4A</a>   |
| SPAG9   | Sperm Associated Antigen 9                                   | Protein Coding | 47 | GC17M050962 | 1.366934896 | <a href="https://www.genecards.org/cgi-bin/carddisp.pl?gene=SPAG9">https://www.genecards.org/cgi-bin/carddisp.pl?gene=SPAG9</a>     |
| ITGB5   | Integrin Subunit Beta 5                                      | Protein Coding | 53 | GC03M124761 | 1.364701748 | <a href="https://www.genecards.org/cgi-bin/carddisp.pl?gene=ITGB5">https://www.genecards.org/cgi-bin/carddisp.pl?gene=ITGB5</a>     |
| EPS15L1 | Epidermal Growth Factor Receptor Pathway Substrate 15 Like 1 | Protein Coding | 46 | GC19M016333 | 1.364116907 | <a href="https://www.genecards.org/cgi-bin/carddisp.pl?gene=EPS15L1">https://www.genecards.org/cgi-bin/carddisp.pl?gene=EPS15L1</a> |
| CTNNA1  | Catenin Alpha 1                                              | Protein Coding | 52 | GC05P138613 | 1.36270237  | <a href="https://www.genecards.org/cgi-bin/carddisp.pl?gene=CTNNA1">https://www.genecards.org/cgi-bin/carddisp.pl?gene=CTNNA1</a>   |
| TAGLN   | Transgelin                                                   | Protein Coding | 50 | GC11P117199 | 1.360505223 | <a href="https://www.genecards.org/cgi-bin/carddisp.pl?gene=TAGLN">https://www.genecards.org/cgi-bin/carddisp.pl?gene=TAGLN</a>     |
| ARHGDIB | Rho GDP Dissociation Inhibitor Beta                          | Protein Coding | 48 | GC12M014942 | 1.357345819 | <a href="https://www.genecards.org/cgi-bin/carddisp.pl?gene=ARHGDIB">https://www.genecards.org/cgi-bin/carddisp.pl?gene=ARHGDIB</a> |

|        |                                                     |                |    |             |             |                                                                                                                                   |
|--------|-----------------------------------------------------|----------------|----|-------------|-------------|-----------------------------------------------------------------------------------------------------------------------------------|
| MSMB   | Microseminoprotein Beta                             | Protein Coding | 47 | GC10M046033 | 1.356166363 | <a href="https://www.genecards.org/cgi-bin/carddisp.pl?gene=MSMB">https://www.genecards.org/cgi-bin/carddisp.pl?gene=MSMB</a>     |
| PTN    | Pleiotrophin                                        | Protein Coding | 47 | GC07M137227 | 1.355832815 | <a href="https://www.genecards.org/cgi-bin/carddisp.pl?gene=PTN">https://www.genecards.org/cgi-bin/carddisp.pl?gene=PTN</a>       |
| MEIS1  | Meis Homeobox 1                                     | Protein Coding | 48 | GC02P066433 | 1.35497427  | <a href="https://www.genecards.org/cgi-bin/carddisp.pl?gene=MEIS1">https://www.genecards.org/cgi-bin/carddisp.pl?gene=MEIS1</a>   |
| EPHA1  | EPH Receptor A1                                     | Protein Coding | 54 | GC07M143390 | 1.35342288  | <a href="https://www.genecards.org/cgi-bin/carddisp.pl?gene=EPHA1">https://www.genecards.org/cgi-bin/carddisp.pl?gene=EPHA1</a>   |
| YES1   | YES Proto-Oncogene 1, Src Family Tyrosine Kinase    | Protein Coding | 54 | GC18M000721 | 1.35342288  | <a href="https://www.genecards.org/cgi-bin/carddisp.pl?gene=YES1">https://www.genecards.org/cgi-bin/carddisp.pl?gene=YES1</a>     |
| LAIR1  | Leukocyte Associated Immunoglobulin Like Receptor 1 | Protein Coding | 48 | GC19M054351 | 1.353043079 | <a href="https://www.genecards.org/cgi-bin/carddisp.pl?gene=LAIR1">https://www.genecards.org/cgi-bin/carddisp.pl?gene=LAIR1</a>   |
| TFPT   | TCF3 Fusion Partner                                 | Protein Coding | 42 | GC19M054107 | 1.352261066 | <a href="https://www.genecards.org/cgi-bin/carddisp.pl?gene=TFPT">https://www.genecards.org/cgi-bin/carddisp.pl?gene=TFPT</a>     |
| SH2B2  | SH2B Adaptor Protein 2                              | Protein Coding | 44 | GC07P102286 | 1.35112071  | <a href="https://www.genecards.org/cgi-bin/carddisp.pl?gene=SH2B2">https://www.genecards.org/cgi-bin/carddisp.pl?gene=SH2B2</a>   |
| GRIN2C | Glutamate Ionotropic Receptor NMDA Type Subunit 2C  | Protein Coding | 52 | GC17M074842 | 1.350762725 | <a href="https://www.genecards.org/cgi-bin/carddisp.pl?gene=GRIN2C">https://www.genecards.org/cgi-bin/carddisp.pl?gene=GRIN2C</a> |
| P2RY1  | Purinergic Receptor P2Y1                            | Protein Coding | 53 | GC03P152835 | 1.347520828 | <a href="https://www.genecards.org/cgi-bin/carddisp.pl?gene=P2RY1">https://www.genecards.org/cgi-bin/carddisp.pl?gene=P2RY1</a>   |
| IL3RA  | Interleukin 3 Receptor Subunit Alpha                | Protein Coding | 51 | GC0XP001336 | 1.346916914 | <a href="https://www.genecards.org/cgi-bin/carddisp.pl?gene=IL3RA">https://www.genecards.org/cgi-bin/carddisp.pl?gene=IL3RA</a>   |
| IL1RAP | Interleukin 1 Receptor Accessory Protein            | Protein Coding | 53 | GC03P190514 | 1.346740007 | <a href="https://www.genecards.org/cgi-bin/carddisp.pl?gene=IL1RAP">https://www.genecards.org/cgi-bin/carddisp.pl?gene=IL1RAP</a> |
| EFNA1  | Ephrin A1                                           | Protein Coding | 51 | GC01P155127 | 1.343958974 | <a href="https://www.genecards.org/cgi-bin/carddisp.pl?gene=EFNA1">https://www.genecards.org/cgi-bin/carddisp.pl?gene=EFNA1</a>   |
| GLI1   | GLI Family Zinc Finger 1                            | Protein Coding | 56 | GC12P057616 | 1.343919992 | <a href="https://www.genecards.org/cgi-bin/carddisp.pl?gene=GLI1">https://www.genecards.org/cgi-bin/carddisp.pl?gene=GLI1</a>     |
| RHOD   | Ras Homolog Family Member D                         | Protein Coding | 43 | GC11P071007 | 1.342387915 | <a href="https://www.genecards.org/cgi-bin/carddisp.pl?gene=RHOD">https://www.genecards.org/cgi-bin/carddisp.pl?gene=RHOD</a>     |

|         |                                                         |                |    |             |             |                                                                                                                                     |
|---------|---------------------------------------------------------|----------------|----|-------------|-------------|-------------------------------------------------------------------------------------------------------------------------------------|
| PTPRM   | Protein Tyrosine Phosphatase Receptor Type M            | Protein Coding | 51 | GC18P007557 | 1.341762543 | <a href="https://www.genecards.org/cgi-bin/carddisp.pl?gene=PTPRM">https://www.genecards.org/cgi-bin/carddisp.pl?gene=PTPRM</a>     |
| ZDHHC20 | Zinc Finger DHHC-Type Palmitoyltransferase 20           | Protein Coding | 42 | GC13M021570 | 1.341608047 | <a href="https://www.genecards.org/cgi-bin/carddisp.pl?gene=ZDHHC20">https://www.genecards.org/cgi-bin/carddisp.pl?gene=ZDHHC20</a> |
| CD72    | CD72 Molecule                                           | Protein Coding | 46 | GC09M035610 | 1.341193438 | <a href="https://www.genecards.org/cgi-bin/carddisp.pl?gene=CD72">https://www.genecards.org/cgi-bin/carddisp.pl?gene=CD72</a>       |
| IRF2    | Interferon Regulatory Factor 2                          | Protein Coding | 49 | GC04M184387 | 1.339345694 | <a href="https://www.genecards.org/cgi-bin/carddisp.pl?gene=IRF2">https://www.genecards.org/cgi-bin/carddisp.pl?gene=IRF2</a>       |
| ETF1    | Eukaryotic Translation Termination Factor 1             | Protein Coding | 49 | GC05M138506 | 1.33785367  | <a href="https://www.genecards.org/cgi-bin/carddisp.pl?gene=ETF1">https://www.genecards.org/cgi-bin/carddisp.pl?gene=ETF1</a>       |
| CD3G    | CD3 Gamma Subunit Of T-Cell Receptor Complex            | Protein Coding | 54 | GC11P118344 | 1.336899042 | <a href="https://www.genecards.org/cgi-bin/carddisp.pl?gene=CD3G">https://www.genecards.org/cgi-bin/carddisp.pl?gene=CD3G</a>       |
| CACNG2  | Calcium Voltage-Gated Channel Auxiliary Subunit Gamma 2 | Protein Coding | 51 | GC22M061447 | 1.336666226 | <a href="https://www.genecards.org/cgi-bin/carddisp.pl?gene=CACNG2">https://www.genecards.org/cgi-bin/carddisp.pl?gene=CACNG2</a>   |
| CASP6   | Caspase 6                                               | Protein Coding | 55 | GC04M109688 | 1.335477829 | <a href="https://www.genecards.org/cgi-bin/carddisp.pl?gene=CASP6">https://www.genecards.org/cgi-bin/carddisp.pl?gene=CASP6</a>     |
| DST     | Dystonin                                                | Protein Coding | 49 | GC06M056457 | 1.333791614 | <a href="https://www.genecards.org/cgi-bin/carddisp.pl?gene=DST">https://www.genecards.org/cgi-bin/carddisp.pl?gene=DST</a>         |
| SIGLEC1 | Sialic Acid Binding Ig Like Lectin 1                    | Protein Coding | 47 | GC20M003686 | 1.33364892  | <a href="https://www.genecards.org/cgi-bin/carddisp.pl?gene=SIGLEC1">https://www.genecards.org/cgi-bin/carddisp.pl?gene=SIGLEC1</a> |
| SPIB    | Spi-B Transcription Factor                              | Protein Coding | 46 | GC19P050418 | 1.333257198 | <a href="https://www.genecards.org/cgi-bin/carddisp.pl?gene=SPIB">https://www.genecards.org/cgi-bin/carddisp.pl?gene=SPIB</a>       |
| CBLB    | Cbl Proto-Oncogene B                                    | Protein Coding | 52 | GC03M105655 | 1.332267404 | <a href="https://www.genecards.org/cgi-bin/carddisp.pl?gene=CBLB">https://www.genecards.org/cgi-bin/carddisp.pl?gene=CBLB</a>       |
| CBLC    | Cbl Proto-Oncogene C                                    | Protein Coding | 44 | GC19P044777 | 1.332267404 | <a href="https://www.genecards.org/cgi-bin/carddisp.pl?gene=CBLC">https://www.genecards.org/cgi-bin/carddisp.pl?gene=CBLC</a>       |
| ISG20   | Interferon Stimulated Exonuclease Gene 20               | Protein Coding | 46 | GC15P088635 | 1.330898881 | <a href="https://www.genecards.org/cgi-bin/carddisp.pl?gene=ISG20">https://www.genecards.org/cgi-bin/carddisp.pl?gene=ISG20</a>     |
| TGFBR3  | Transforming Growth Factor Beta Receptor 3              | Protein Coding | 53 | GC01M091680 | 1.329393387 | <a href="https://www.genecards.org/cgi-bin/carddisp.pl?gene=TGFBR3">https://www.genecards.org/cgi-bin/carddisp.pl?gene=TGFBR3</a>   |

|         |                                                  |                |    |             |             |                                                                                                                                     |
|---------|--------------------------------------------------|----------------|----|-------------|-------------|-------------------------------------------------------------------------------------------------------------------------------------|
| PTPRE   | Protein Tyrosine Phosphatase Receptor Type E     | Protein Coding | 49 | GC10P127907 | 1.328865051 | <a href="https://www.genecards.org/cgi-bin/carddisp.pl?gene=PTPRE">https://www.genecards.org/cgi-bin/carddisp.pl?gene=PTPRE</a>     |
| HMG1    | High Mobility Group Nucleosome Binding Domain 1  | Protein Coding | 47 | GC21M039342 | 1.328797698 | <a href="https://www.genecards.org/cgi-bin/carddisp.pl?gene=HMG1">https://www.genecards.org/cgi-bin/carddisp.pl?gene=HMG1</a>       |
| LPAR2   | Lysophosphatidic Acid Receptor 2                 | Protein Coding | 52 | GC19M019624 | 1.32547009  | <a href="https://www.genecards.org/cgi-bin/carddisp.pl?gene=LPAR2">https://www.genecards.org/cgi-bin/carddisp.pl?gene=LPAR2</a>     |
| TM9SF2  | Transmembrane 9 Superfamily Member 2             | Protein Coding | 42 | GC13P099446 | 1.323809385 | <a href="https://www.genecards.org/cgi-bin/carddisp.pl?gene=TM9SF2">https://www.genecards.org/cgi-bin/carddisp.pl?gene=TM9SF2</a>   |
| CCL8    | C-C Motif Chemokine Ligand 8                     | Protein Coding | 46 | GC17P034319 | 1.31999135  | <a href="https://www.genecards.org/cgi-bin/carddisp.pl?gene=CCL8">https://www.genecards.org/cgi-bin/carddisp.pl?gene=CCL8</a>       |
| NPSR1   | Neuropeptide S Receptor 1                        | Protein Coding | 47 | GC07P034664 | 1.319486618 | <a href="https://www.genecards.org/cgi-bin/carddisp.pl?gene=NPSR1">https://www.genecards.org/cgi-bin/carddisp.pl?gene=NPSR1</a>     |
| AGFG1   | ArfGAP With FG Repeats 1                         | Protein Coding | 47 | GC02P227473 | 1.318310976 | <a href="https://www.genecards.org/cgi-bin/carddisp.pl?gene=AGFG1">https://www.genecards.org/cgi-bin/carddisp.pl?gene=AGFG1</a>     |
| RECQL   | RecQ Like Helicase                               | Protein Coding | 48 | GC12M021468 | 1.316822648 | <a href="https://www.genecards.org/cgi-bin/carddisp.pl?gene=RECQL">https://www.genecards.org/cgi-bin/carddisp.pl?gene=RECQL</a>     |
| GAK     | Cyclin G Associated Kinase                       | Protein Coding | 51 | GC04M000849 | 1.314225674 | <a href="https://www.genecards.org/cgi-bin/carddisp.pl?gene=GAK">https://www.genecards.org/cgi-bin/carddisp.pl?gene=GAK</a>         |
| MAP3K4  | Mitogen-Activated Protein Kinase Kinase Kinase 4 | Protein Coding | 50 | GC06P160991 | 1.314225674 | <a href="https://www.genecards.org/cgi-bin/carddisp.pl?gene=MAP3K4">https://www.genecards.org/cgi-bin/carddisp.pl?gene=MAP3K4</a>   |
| DUSP5   | Dual Specificity Phosphatase 5                   | Protein Coding | 48 | GC10P110497 | 1.314225674 | <a href="https://www.genecards.org/cgi-bin/carddisp.pl?gene=DUSP5">https://www.genecards.org/cgi-bin/carddisp.pl?gene=DUSP5</a>     |
| FSCN1   | Fascin Actin-Bundling Protein 1                  | Protein Coding | 51 | GC07P005592 | 1.31301713  | <a href="https://www.genecards.org/cgi-bin/carddisp.pl?gene=FSCN1">https://www.genecards.org/cgi-bin/carddisp.pl?gene=FSCN1</a>     |
| PAX3    | Paired Box 3                                     | Protein Coding | 52 | GC02M222199 | 1.312791586 | <a href="https://www.genecards.org/cgi-bin/carddisp.pl?gene=PAX3">https://www.genecards.org/cgi-bin/carddisp.pl?gene=PAX3</a>       |
| STYX    | Serine/Threonine/Tyrosine Interacting Protein    | Protein Coding | 41 | GC14P052730 | 1.310669065 | <a href="https://www.genecards.org/cgi-bin/carddisp.pl?gene=STYX">https://www.genecards.org/cgi-bin/carddisp.pl?gene=STYX</a>       |
| GNPNAT1 | Glucosamine-Phosphate N-Acetyltransferase 1      | Protein Coding | 46 | GC14M052775 | 1.30973053  | <a href="https://www.genecards.org/cgi-bin/carddisp.pl?gene=GNPNAT1">https://www.genecards.org/cgi-bin/carddisp.pl?gene=GNPNAT1</a> |

|         |                                                    |                |    |             |             |                                                                                                                                     |
|---------|----------------------------------------------------|----------------|----|-------------|-------------|-------------------------------------------------------------------------------------------------------------------------------------|
| HOXA1   | Homeobox A1                                        | Protein Coding | 48 | GC07M027092 | 1.308444142 | <a href="https://www.genecards.org/cgi-bin/carddisp.pl?gene=HOXA1">https://www.genecards.org/cgi-bin/carddisp.pl?gene=HOXA1</a>     |
| ZP3     | Zona Pellucida Glycoprotein 3                      | Protein Coding | 50 | GC07P076837 | 1.305477381 | <a href="https://www.genecards.org/cgi-bin/carddisp.pl?gene=ZP3">https://www.genecards.org/cgi-bin/carddisp.pl?gene=ZP3</a>         |
| PAK3    | P21 (RAC1) Activated Kinase 3                      | Protein Coding | 57 | GC0XP110944 | 1.301856756 | <a href="https://www.genecards.org/cgi-bin/carddisp.pl?gene=PAK3">https://www.genecards.org/cgi-bin/carddisp.pl?gene=PAK3</a>       |
| EFNA4   | Ephrin A4                                          | Protein Coding | 50 | GC01P155063 | 1.301198006 | <a href="https://www.genecards.org/cgi-bin/carddisp.pl?gene=EFNA4">https://www.genecards.org/cgi-bin/carddisp.pl?gene=EFNA4</a>     |
| CD84    | CD84 Molecule                                      | Protein Coding | 49 | GC01M160541 | 1.301198006 | <a href="https://www.genecards.org/cgi-bin/carddisp.pl?gene=CD84">https://www.genecards.org/cgi-bin/carddisp.pl?gene=CD84</a>       |
| CTNND2  | Catenin Delta 2                                    | Protein Coding | 49 | GC05M010971 | 1.297608376 | <a href="https://www.genecards.org/cgi-bin/carddisp.pl?gene=CTNND2">https://www.genecards.org/cgi-bin/carddisp.pl?gene=CTNND2</a>   |
| CYTH1   | Cytohesin 1                                        | Protein Coding | 48 | GC17M078674 | 1.297608376 | <a href="https://www.genecards.org/cgi-bin/carddisp.pl?gene=CYTH1">https://www.genecards.org/cgi-bin/carddisp.pl?gene=CYTH1</a>     |
| TESK1   | Testis Associated Actin Remodelling Kinase 1       | Protein Coding | 48 | GC09P035605 | 1.296860695 | <a href="https://www.genecards.org/cgi-bin/carddisp.pl?gene=TESK1">https://www.genecards.org/cgi-bin/carddisp.pl?gene=TESK1</a>     |
| NECTIN1 | Nectin Cell Adhesion Molecule 1                    | Protein Coding | 53 | GC11M119624 | 1.296584606 | <a href="https://www.genecards.org/cgi-bin/carddisp.pl?gene=NECTIN1">https://www.genecards.org/cgi-bin/carddisp.pl?gene=NECTIN1</a> |
| WASF2   | WASP Family Member 2                               | Protein Coding | 50 | GC01M027404 | 1.296584606 | <a href="https://www.genecards.org/cgi-bin/carddisp.pl?gene=WASF2">https://www.genecards.org/cgi-bin/carddisp.pl?gene=WASF2</a>     |
| NCOA4   | Nuclear Receptor Coactivator 4                     | Protein Coding | 46 | GC10M046005 | 1.295899391 | <a href="https://www.genecards.org/cgi-bin/carddisp.pl?gene=NCOA4">https://www.genecards.org/cgi-bin/carddisp.pl?gene=NCOA4</a>     |
| TRIP10  | Thyroid Hormone Receptor Interactor 10             | Protein Coding | 47 | GC19P006737 | 1.292088509 | <a href="https://www.genecards.org/cgi-bin/carddisp.pl?gene=TRIP10">https://www.genecards.org/cgi-bin/carddisp.pl?gene=TRIP10</a>   |
| PRSS3   | Serine Protease 3                                  | Protein Coding | 50 | GC09P033750 | 1.290347695 | <a href="https://www.genecards.org/cgi-bin/carddisp.pl?gene=PRSS3">https://www.genecards.org/cgi-bin/carddisp.pl?gene=PRSS3</a>     |
| GRIN2D  | Glutamate Ionotropic Receptor NMDA Type Subunit 2D | Protein Coding | 55 | GC19P073182 | 1.288183808 | <a href="https://www.genecards.org/cgi-bin/carddisp.pl?gene=GRIN2D">https://www.genecards.org/cgi-bin/carddisp.pl?gene=GRIN2D</a>   |
| KLRD1   | Killer Cell Lectin Like Receptor D1                | Protein Coding | 48 | GC12P010226 | 1.287742376 | <a href="https://www.genecards.org/cgi-bin/carddisp.pl?gene=KLRD1">https://www.genecards.org/cgi-bin/carddisp.pl?gene=KLRD1</a>     |

|         |                                                                     |                |    |             |             |                                                                                                                                     |
|---------|---------------------------------------------------------------------|----------------|----|-------------|-------------|-------------------------------------------------------------------------------------------------------------------------------------|
| MAP4K1  | Mitogen-Activated Protein Kinase Kinase Kinase Kinase 1             | Protein Coding | 50 | GC19M038587 | 1.286914349 | <a href="https://www.genecards.org/cgi-bin/carddisp.pl?gene=MAP4K1">https://www.genecards.org/cgi-bin/carddisp.pl?gene=MAP4K1</a>   |
| KIF5A   | Kinesin Family Member 5A                                            | Protein Coding | 51 | GC12P057555 | 1.28510344  | <a href="https://www.genecards.org/cgi-bin/carddisp.pl?gene=KIF5A">https://www.genecards.org/cgi-bin/carddisp.pl?gene=KIF5A</a>     |
| GYPC    | Glycophorin C (Gerbich Blood Group)                                 | Protein Coding | 50 | GC02P126655 | 1.281240463 | <a href="https://www.genecards.org/cgi-bin/carddisp.pl?gene=GYPC">https://www.genecards.org/cgi-bin/carddisp.pl?gene=GYPC</a>       |
| SORBS2  | Sorbin And SH3 Domain Containing 2                                  | Protein Coding | 47 | GC04M185585 | 1.275793552 | <a href="https://www.genecards.org/cgi-bin/carddisp.pl?gene=SORBS2">https://www.genecards.org/cgi-bin/carddisp.pl?gene=SORBS2</a>   |
| EFS     | Embryonal Fyn-Associated Substrate                                  | Protein Coding | 41 | GC14M023356 | 1.274370074 | <a href="https://www.genecards.org/cgi-bin/carddisp.pl?gene=EFS">https://www.genecards.org/cgi-bin/carddisp.pl?gene=EFS</a>         |
| PTPRT   | Protein Tyrosine Phosphatase Receptor Type T                        | Protein Coding | 51 | GC20M042072 | 1.274230242 | <a href="https://www.genecards.org/cgi-bin/carddisp.pl?gene=PTPRT">https://www.genecards.org/cgi-bin/carddisp.pl?gene=PTPRT</a>     |
| MAP3K13 | Mitogen-Activated Protein Kinase Kinase Kinase 13                   | Protein Coding | 48 | GC03P185282 | 1.274230242 | <a href="https://www.genecards.org/cgi-bin/carddisp.pl?gene=MAP3K13">https://www.genecards.org/cgi-bin/carddisp.pl?gene=MAP3K13</a> |
| ABCC10  | ATP Binding Cassette Subfamily C Member 10                          | Protein Coding | 45 | GC06P043427 | 1.270961523 | <a href="https://www.genecards.org/cgi-bin/carddisp.pl?gene=ABCC10">https://www.genecards.org/cgi-bin/carddisp.pl?gene=ABCC10</a>   |
| SH2D4B  | SH2 Domain Containing 4B                                            | Protein Coding | 38 | GC10P094472 | 1.270071507 | <a href="https://www.genecards.org/cgi-bin/carddisp.pl?gene=SH2D4B">https://www.genecards.org/cgi-bin/carddisp.pl?gene=SH2D4B</a>   |
| PLCXD3  | Phosphatidylinositol Specific Phospholipase C X Domain Containing 3 | Protein Coding | 43 | GC05M041306 | 1.269739866 | <a href="https://www.genecards.org/cgi-bin/carddisp.pl?gene=PLCXD3">https://www.genecards.org/cgi-bin/carddisp.pl?gene=PLCXD3</a>   |
| GMNN    | Geminin DNA Replication Inhibitor                                   | Protein Coding | 51 | GC06P024779 | 1.268566847 | <a href="https://www.genecards.org/cgi-bin/carddisp.pl?gene=GMNN">https://www.genecards.org/cgi-bin/carddisp.pl?gene=GMNN</a>       |
| NFE2    | Nuclear Factor, Erythroid 2                                         | Protein Coding | 46 | GC12M054292 | 1.266424775 | <a href="https://www.genecards.org/cgi-bin/carddisp.pl?gene=NFE2">https://www.genecards.org/cgi-bin/carddisp.pl?gene=NFE2</a>       |
| SLC15A4 | Solute Carrier Family 15 Member 4                                   | Protein Coding | 44 | GC12M128793 | 1.263706923 | <a href="https://www.genecards.org/cgi-bin/carddisp.pl?gene=SLC15A4">https://www.genecards.org/cgi-bin/carddisp.pl?gene=SLC15A4</a> |
| RPL10L  | Ribosomal Protein L10 Like                                          | Protein Coding | 42 | GC14M046651 | 1.262371421 | <a href="https://www.genecards.org/cgi-bin/carddisp.pl?gene=RPL10L">https://www.genecards.org/cgi-bin/carddisp.pl?gene=RPL10L</a>   |
| GRM6    | Glutamate Metabotropic Receptor 6                                   | Protein Coding | 53 | GC05M178978 | 1.260549188 | <a href="https://www.genecards.org/cgi-bin/carddisp.pl?gene=GRM6">https://www.genecards.org/cgi-bin/carddisp.pl?gene=GRM6</a>       |

|         |                                               |                |    |             |             |                                                                                                                                     |
|---------|-----------------------------------------------|----------------|----|-------------|-------------|-------------------------------------------------------------------------------------------------------------------------------------|
| DOCK1   | Dedicator Of Cytokinesis 1                    | Protein Coding | 50 | GC10P126905 | 1.260548592 | <a href="https://www.genecards.org/cgi-bin/carddisp.pl?gene=DOCK1">https://www.genecards.org/cgi-bin/carddisp.pl?gene=DOCK1</a>     |
| GRIP2   | Glutamate Receptor Interacting Protein 2      | Protein Coding | 42 | GC03M021835 | 1.258551359 | <a href="https://www.genecards.org/cgi-bin/carddisp.pl?gene=GRIP2">https://www.genecards.org/cgi-bin/carddisp.pl?gene=GRIP2</a>     |
| NRBF2   | Nuclear Receptor Binding Factor 2             | Protein Coding | 43 | GC10P063133 | 1.257070303 | <a href="https://www.genecards.org/cgi-bin/carddisp.pl?gene=NRBF2">https://www.genecards.org/cgi-bin/carddisp.pl?gene=NRBF2</a>     |
| ADD2    | Adducin 2                                     | Protein Coding | 47 | GC02M070626 | 1.252891302 | <a href="https://www.genecards.org/cgi-bin/carddisp.pl?gene=ADD2">https://www.genecards.org/cgi-bin/carddisp.pl?gene=ADD2</a>       |
| CNTNAP1 | Contactin Associated Protein 1                | Protein Coding | 50 | GC17P042682 | 1.252706528 | <a href="https://www.genecards.org/cgi-bin/carddisp.pl?gene=CNTNAP1">https://www.genecards.org/cgi-bin/carddisp.pl?gene=CNTNAP1</a> |
| MDK     | Midkine                                       | Protein Coding | 50 | GC11P046380 | 1.25058341  | <a href="https://www.genecards.org/cgi-bin/carddisp.pl?gene=MDK">https://www.genecards.org/cgi-bin/carddisp.pl?gene=MDK</a>         |
| ZBTB11  | Zinc Finger And BTB Domain Containing 11      | Protein Coding | 42 | GC03M101648 | 1.248044372 | <a href="https://www.genecards.org/cgi-bin/carddisp.pl?gene=ZBTB11">https://www.genecards.org/cgi-bin/carddisp.pl?gene=ZBTB11</a>   |
| CNTNAP2 | Contactin Associated Protein 2                | Protein Coding | 51 | GC07P146116 | 1.244960666 | <a href="https://www.genecards.org/cgi-bin/carddisp.pl?gene=CNTNAP2">https://www.genecards.org/cgi-bin/carddisp.pl?gene=CNTNAP2</a> |
| ZDHHC21 | Zinc Finger DHHC-Type Palmitoyltransferase 21 | Protein Coding | 40 | GC09M014590 | 1.242198229 | <a href="https://www.genecards.org/cgi-bin/carddisp.pl?gene=ZDHHC21">https://www.genecards.org/cgi-bin/carddisp.pl?gene=ZDHHC21</a> |
| TSC22D3 | TSC22 Domain Family Member 3                  | Protein Coding | 46 | GC0XM107713 | 1.240224838 | <a href="https://www.genecards.org/cgi-bin/carddisp.pl?gene=TSC22D3">https://www.genecards.org/cgi-bin/carddisp.pl?gene=TSC22D3</a> |
| KAT6B   | Lysine Acetyltransferase 6B                   | Protein Coding | 52 | GC10P074873 | 1.239717484 | <a href="https://www.genecards.org/cgi-bin/carddisp.pl?gene=KAT6B">https://www.genecards.org/cgi-bin/carddisp.pl?gene=KAT6B</a>     |
| DFFB    | DNA Fragmentation Factor Subunit Beta         | Protein Coding | 50 | GC01P003857 | 1.237127662 | <a href="https://www.genecards.org/cgi-bin/carddisp.pl?gene=DFFB">https://www.genecards.org/cgi-bin/carddisp.pl?gene=DFFB</a>       |
| CD6     | CD6 Molecule                                  | Protein Coding | 48 | GC11P060971 | 1.236596346 | <a href="https://www.genecards.org/cgi-bin/carddisp.pl?gene=CD6">https://www.genecards.org/cgi-bin/carddisp.pl?gene=CD6</a>         |
| GRB7    | Growth Factor Receptor Bound Protein 7        | Protein Coding | 50 | GC17P061875 | 1.234689474 | <a href="https://www.genecards.org/cgi-bin/carddisp.pl?gene=GRB7">https://www.genecards.org/cgi-bin/carddisp.pl?gene=GRB7</a>       |
| CDYL    | Chromodomain Y Like                           | Protein Coding | 46 | GC06P004706 | 1.230699301 | <a href="https://www.genecards.org/cgi-bin/carddisp.pl?gene=CDYL">https://www.genecards.org/cgi-bin/carddisp.pl?gene=CDYL</a>       |

|          |                                                                   |                |    |             |             |                                                                                                                                       |
|----------|-------------------------------------------------------------------|----------------|----|-------------|-------------|---------------------------------------------------------------------------------------------------------------------------------------|
| EPHB6    | EPH Receptor B6                                                   | Protein Coding | 51 | GC07P149981 | 1.230352283 | <a href="https://www.genecards.org/cgi-bin/carddisp.pl?gene=EPHB6">https://www.genecards.org/cgi-bin/carddisp.pl?gene=EPHB6</a>       |
| STAM     | Signal Transducing Adaptor Molecule                               | Protein Coding | 47 | GC10P017698 | 1.228438377 | <a href="https://www.genecards.org/cgi-bin/carddisp.pl?gene=STAM">https://www.genecards.org/cgi-bin/carddisp.pl?gene=STAM</a>         |
| CYRIB    | CYFIP Related Rac1 Interactor B                                   | Protein Coding | 40 | GC08M132565 | 1.221472621 | <a href="https://www.genecards.org/cgi-bin/carddisp.pl?gene=CYRIB">https://www.genecards.org/cgi-bin/carddisp.pl?gene=CYRIB</a>       |
| GLRA2    | Glycine Receptor Alpha 2                                          | Protein Coding | 52 | GC0XP014448 | 1.221354008 | <a href="https://www.genecards.org/cgi-bin/carddisp.pl?gene=GLRA2">https://www.genecards.org/cgi-bin/carddisp.pl?gene=GLRA2</a>       |
| SNU13    | Small Nuclear Ribonucleoprotein 13                                | Protein Coding | 46 | GC22M061492 | 1.218278646 | <a href="https://www.genecards.org/cgi-bin/carddisp.pl?gene=SNU13">https://www.genecards.org/cgi-bin/carddisp.pl?gene=SNU13</a>       |
| TREM1    | Triggering Receptor Expressed On Myeloid Cells 1                  | Protein Coding | 48 | GC06M041267 | 1.218127251 | <a href="https://www.genecards.org/cgi-bin/carddisp.pl?gene=TREM1">https://www.genecards.org/cgi-bin/carddisp.pl?gene=TREM1</a>       |
| ZDHHC1   | Zinc Finger DHHC-Type Containing 1                                | Protein Coding | 42 | GC16M067394 | 1.217028856 | <a href="https://www.genecards.org/cgi-bin/carddisp.pl?gene=ZDHHC1">https://www.genecards.org/cgi-bin/carddisp.pl?gene=ZDHHC1</a>     |
| NFASC    | Neurofascin                                                       | Protein Coding | 50 | GC01P204828 | 1.212895989 | <a href="https://www.genecards.org/cgi-bin/carddisp.pl?gene=NFASC">https://www.genecards.org/cgi-bin/carddisp.pl?gene=NFASC</a>       |
| TYROBP   | Transmembrane Immune Signaling Adaptor TYROBP                     | Protein Coding | 50 | GC19M035904 | 1.212895989 | <a href="https://www.genecards.org/cgi-bin/carddisp.pl?gene=TYROBP">https://www.genecards.org/cgi-bin/carddisp.pl?gene=TYROBP</a>     |
| RHOQ     | Ras Homolog Family Member Q                                       | Protein Coding | 48 | GC02P046543 | 1.205293775 | <a href="https://www.genecards.org/cgi-bin/carddisp.pl?gene=RHOQ">https://www.genecards.org/cgi-bin/carddisp.pl?gene=RHOQ</a>         |
| NEDD9    | Neural Precursor Cell Expressed, Developmentally Down-Regulated 9 | Protein Coding | 48 | GC06M011183 | 1.203222752 | <a href="https://www.genecards.org/cgi-bin/carddisp.pl?gene=NEDD9">https://www.genecards.org/cgi-bin/carddisp.pl?gene=NEDD9</a>       |
| ZDHHC17  | Zinc Finger DHHC-Type Palmitoyltransferase 17                     | Protein Coding | 44 | GC12P076763 | 1.20134306  | <a href="https://www.genecards.org/cgi-bin/carddisp.pl?gene=ZDHHC17">https://www.genecards.org/cgi-bin/carddisp.pl?gene=ZDHHC17</a>   |
| MARCKSL1 | MARCKS Like 1                                                     | Protein Coding | 43 | GC01M032334 | 1.201022148 | <a href="https://www.genecards.org/cgi-bin/carddisp.pl?gene=MARCKSL1">https://www.genecards.org/cgi-bin/carddisp.pl?gene=MARCKSL1</a> |
| GUCA2A   | Guanylate Cyclase Activator 2A                                    | Protein Coding | 43 | GC01M042162 | 1.200126886 | <a href="https://www.genecards.org/cgi-bin/carddisp.pl?gene=GUCA2A">https://www.genecards.org/cgi-bin/carddisp.pl?gene=GUCA2A</a>     |
| SLC15A3  | Solute Carrier Family 15 Member 3                                 | Protein Coding | 43 | GC11M099519 | 1.196174622 | <a href="https://www.genecards.org/cgi-bin/carddisp.pl?gene=SLC15A3">https://www.genecards.org/cgi-bin/carddisp.pl?gene=SLC15A3</a>   |

|         |                                                                                      |                |    |             |             |                                                                                                                                       |
|---------|--------------------------------------------------------------------------------------|----------------|----|-------------|-------------|---------------------------------------------------------------------------------------------------------------------------------------|
| METTL6  | Methyltransferase 6, Methylcytidine                                                  | Protein Coding | 40 | GC03M021855 | 1.196174622 | <a href="https://www.genecards.org/cgi-bin/carddisp.pl?gene=METTL6">https://www.genecards.org/cgi-bin/carddisp.pl?gene=METTL6</a>     |
| STX4    | Syntaxin 4                                                                           | Protein Coding | 48 | GC16P042831 | 1.193569422 | <a href="https://www.genecards.org/cgi-bin/carddisp.pl?gene=STX4">https://www.genecards.org/cgi-bin/carddisp.pl?gene=STX4</a>         |
| DNASE1  | Deoxyribonuclease 1                                                                  | Protein Coding | 50 | GC16P003611 | 1.188389778 | <a href="https://www.genecards.org/cgi-bin/carddisp.pl?gene=DNASE1">https://www.genecards.org/cgi-bin/carddisp.pl?gene=DNASE1</a>     |
| SIGMAR1 | Sigma Non-Opioid Intracellular Receptor 1                                            | Protein Coding | 54 | GC09M034634 | 1.185390472 | <a href="https://www.genecards.org/cgi-bin/carddisp.pl?gene=SIGMAR1">https://www.genecards.org/cgi-bin/carddisp.pl?gene=SIGMAR1</a>   |
| CDH3    | Cadherin 3                                                                           | Protein Coding | 54 | GC16P068637 | 1.185385942 | <a href="https://www.genecards.org/cgi-bin/carddisp.pl?gene=CDH3">https://www.genecards.org/cgi-bin/carddisp.pl?gene=CDH3</a>         |
| BAMBI   | BMP And Activin Membrane Bound Inhibitor                                             | Protein Coding | 50 | GC10P028685 | 1.185385942 | <a href="https://www.genecards.org/cgi-bin/carddisp.pl?gene=BAMBI">https://www.genecards.org/cgi-bin/carddisp.pl?gene=BAMBI</a>       |
| TLX1    | T Cell Leukemia Homeobox 1                                                           | Protein Coding | 46 | GC10P101130 | 1.180054665 | <a href="https://www.genecards.org/cgi-bin/carddisp.pl?gene=TLX1">https://www.genecards.org/cgi-bin/carddisp.pl?gene=TLX1</a>         |
| KIR2DL1 | Killer Cell Immunoglobulin Like Receptor, Two Ig Domains And Long Cytoplasmic Tail 1 | Protein Coding | 42 | GC19P073500 | 1.180054665 | <a href="https://www.genecards.org/cgi-bin/carddisp.pl?gene=KIR2DL1">https://www.genecards.org/cgi-bin/carddisp.pl?gene=KIR2DL1</a>   |
| FGR     | FGR Proto-Oncogene, Src Family Tyrosine Kinase                                       | Protein Coding | 53 | GC01M028092 | 1.177772641 | <a href="https://www.genecards.org/cgi-bin/carddisp.pl?gene=FGR">https://www.genecards.org/cgi-bin/carddisp.pl?gene=FGR</a>           |
| ARHGEF1 | Rho Guanine Nucleotide Exchange Factor 12                                            | Protein Coding | 49 | GC11P120336 | 1.177476287 | <a href="https://www.genecards.org/cgi-bin/carddisp.pl?gene=ARHGEF12">https://www.genecards.org/cgi-bin/carddisp.pl?gene=ARHGEF12</a> |
| ERVK-6  | Endogenous Retrovirus Group K Member 6, Envelope                                     | Protein Coding | 21 | GC07U903184 | 1.177476287 | <a href="https://www.genecards.org/cgi-bin/carddisp.pl?gene=ERVK-6">https://www.genecards.org/cgi-bin/carddisp.pl?gene=ERVK-6</a>     |
| CDY2A   | Chromodomain Y-Linked 2A                                                             | Protein Coding | 31 | GC0YP018025 | 1.177319527 | <a href="https://www.genecards.org/cgi-bin/carddisp.pl?gene=CDY2A">https://www.genecards.org/cgi-bin/carddisp.pl?gene=CDY2A</a>       |
| KAT8    | Lysine Acetyltransferase 8                                                           | Protein Coding | 51 | GC16P042841 | 1.171679974 | <a href="https://www.genecards.org/cgi-bin/carddisp.pl?gene=KAT8">https://www.genecards.org/cgi-bin/carddisp.pl?gene=KAT8</a>         |
| UBFD1   | Ubiquitin Family Domain Containing 1                                                 | Protein Coding | 39 | GC16P023557 | 1.170049906 | <a href="https://www.genecards.org/cgi-bin/carddisp.pl?gene=UBFD1">https://www.genecards.org/cgi-bin/carddisp.pl?gene=UBFD1</a>       |
| ETV4    | ETS Variant Transcription Factor 4                                                   | Protein Coding | 49 | GC17M043527 | 1.163003087 | <a href="https://www.genecards.org/cgi-bin/carddisp.pl?gene=ETV4">https://www.genecards.org/cgi-bin/carddisp.pl?gene=ETV4</a>         |

|         |                                                        |                |    |             |             |                                                                                                                                     |
|---------|--------------------------------------------------------|----------------|----|-------------|-------------|-------------------------------------------------------------------------------------------------------------------------------------|
| GFRA2   | GDNF Family Receptor Alpha 2                           | Protein Coding | 51 | GC08M021690 | 1.161565185 | <a href="https://www.genecards.org/cgi-bin/carddisp.pl?gene=GFRA2">https://www.genecards.org/cgi-bin/carddisp.pl?gene=GFRA2</a>     |
| CBFA2T2 | CBFA2/RUNX1 Partner Transcriptional Co-Repressor 2     | Protein Coding | 43 | GC20P033490 | 1.158389688 | <a href="https://www.genecards.org/cgi-bin/carddisp.pl?gene=CBFA2T2">https://www.genecards.org/cgi-bin/carddisp.pl?gene=CBFA2T2</a> |
| LACRT   | Lacritin                                               | Protein Coding | 38 | GC12M055055 | 1.158389688 | <a href="https://www.genecards.org/cgi-bin/carddisp.pl?gene=LACRT">https://www.genecards.org/cgi-bin/carddisp.pl?gene=LACRT</a>     |
| CRIPT   | CXXC Repeat Containing Interactor Of PDZ3 Domain       | Protein Coding | 46 | GC02P046616 | 1.155421019 | <a href="https://www.genecards.org/cgi-bin/carddisp.pl?gene=CRIPT">https://www.genecards.org/cgi-bin/carddisp.pl?gene=CRIPT</a>     |
| HDAC11  | Histone Deacetylase 11                                 | Protein Coding | 51 | GC03P013749 | 1.151618719 | <a href="https://www.genecards.org/cgi-bin/carddisp.pl?gene=HDAC11">https://www.genecards.org/cgi-bin/carddisp.pl?gene=HDAC11</a>   |
| S100A2  | S100 Calcium Binding Protein A2                        | Protein Coding | 47 | GC01M153561 | 1.150105476 | <a href="https://www.genecards.org/cgi-bin/carddisp.pl?gene=S100A2">https://www.genecards.org/cgi-bin/carddisp.pl?gene=S100A2</a>   |
| CD96    | CD96 Molecule                                          | Protein Coding | 51 | GC03P111292 | 1.148190379 | <a href="https://www.genecards.org/cgi-bin/carddisp.pl?gene=CD96">https://www.genecards.org/cgi-bin/carddisp.pl?gene=CD96</a>       |
| MMP20   | Matrix Metalloproteinase 20                            | Protein Coding | 51 | GC11M102576 | 1.147861481 | <a href="https://www.genecards.org/cgi-bin/carddisp.pl?gene=MMP20">https://www.genecards.org/cgi-bin/carddisp.pl?gene=MMP20</a>     |
| STK10   | Serine/Threonine Kinase 10                             | Protein Coding | 50 | GC05M172042 | 1.147695661 | <a href="https://www.genecards.org/cgi-bin/carddisp.pl?gene=STK10">https://www.genecards.org/cgi-bin/carddisp.pl?gene=STK10</a>     |
| CCDC26  | CCDC26 Long Non-Coding RNA                             | RNA Gene       | 31 | GC08M132556 | 1.144457102 | <a href="https://www.genecards.org/cgi-bin/carddisp.pl?gene=CCDC26">https://www.genecards.org/cgi-bin/carddisp.pl?gene=CCDC26</a>   |
| ITGA1   | Integrin Subunit Alpha 1                               | Protein Coding | 51 | GC05P052788 | 1.142069697 | <a href="https://www.genecards.org/cgi-bin/carddisp.pl?gene=ITGA1">https://www.genecards.org/cgi-bin/carddisp.pl?gene=ITGA1</a>     |
| CLEC4D  | C-Type Lectin Domain Family 4 Member D                 | Protein Coding | 44 | GC12P008509 | 1.141966224 | <a href="https://www.genecards.org/cgi-bin/carddisp.pl?gene=CLEC4D">https://www.genecards.org/cgi-bin/carddisp.pl?gene=CLEC4D</a>   |
| PSPN    | Persephin                                              | Protein Coding | 43 | GC19M006375 | 1.141966224 | <a href="https://www.genecards.org/cgi-bin/carddisp.pl?gene=PSPN">https://www.genecards.org/cgi-bin/carddisp.pl?gene=PSPN</a>       |
| QPCT    | Glutaminyl-Peptide Cyclotransferase                    | Protein Coding | 50 | GC02P037344 | 1.141539812 | <a href="https://www.genecards.org/cgi-bin/carddisp.pl?gene=QPCT">https://www.genecards.org/cgi-bin/carddisp.pl?gene=QPCT</a>       |
| KCNK3   | Potassium Two Pore Domain Channel Subfamily K Member 3 | Protein Coding | 57 | GC02P026692 | 1.140071511 | <a href="https://www.genecards.org/cgi-bin/carddisp.pl?gene=KCNK3">https://www.genecards.org/cgi-bin/carddisp.pl?gene=KCNK3</a>     |

|         |                                                  |                |    |             |             |                                                                                                                                     |
|---------|--------------------------------------------------|----------------|----|-------------|-------------|-------------------------------------------------------------------------------------------------------------------------------------|
| KLRC1   | Killer Cell Lectin Like Receptor C1              | Protein Coding | 48 | GC12M022635 | 1.138934731 | <a href="https://www.genecards.org/cgi-bin/carddisp.pl?gene=KLRC1">https://www.genecards.org/cgi-bin/carddisp.pl?gene=KLRC1</a>     |
| SPINT1  | Serine Peptidase Inhibitor, Kunitz Type 1        | Protein Coding | 48 | GC15P040844 | 1.138934731 | <a href="https://www.genecards.org/cgi-bin/carddisp.pl?gene=SPINT1">https://www.genecards.org/cgi-bin/carddisp.pl?gene=SPINT1</a>   |
| SS18    | SS18 Subunit Of BAF Chromatin Remodeling Complex | Protein Coding | 46 | GC18M026016 | 1.138934731 | <a href="https://www.genecards.org/cgi-bin/carddisp.pl?gene=SS18">https://www.genecards.org/cgi-bin/carddisp.pl?gene=SS18</a>       |
| TSPAN32 | Tetraspanin 32                                   | Protein Coding | 42 | GC11P002302 | 1.138934731 | <a href="https://www.genecards.org/cgi-bin/carddisp.pl?gene=TSPAN32">https://www.genecards.org/cgi-bin/carddisp.pl?gene=TSPAN32</a> |
| GRM4    | Glutamate Metabotropic Receptor 4                | Protein Coding | 52 | GC06M071850 | 1.136897206 | <a href="https://www.genecards.org/cgi-bin/carddisp.pl?gene=GRM4">https://www.genecards.org/cgi-bin/carddisp.pl?gene=GRM4</a>       |
| TNK2    | Tyrosine Kinase Non Receptor 2                   | Protein Coding | 54 | GC03M195863 | 1.136035442 | <a href="https://www.genecards.org/cgi-bin/carddisp.pl?gene=TNK2">https://www.genecards.org/cgi-bin/carddisp.pl?gene=TNK2</a>       |
| NSUN5   | NOP2/Sun RNA Methyltransferase 5                 | Protein Coding | 45 | GC07M073302 | 1.136035442 | <a href="https://www.genecards.org/cgi-bin/carddisp.pl?gene=NSUN5">https://www.genecards.org/cgi-bin/carddisp.pl?gene=NSUN5</a>     |
| AFAP1   | Actin Filament Associated Protein 1              | Protein Coding | 45 | GC04M007758 | 1.135466218 | <a href="https://www.genecards.org/cgi-bin/carddisp.pl?gene=AFAP1">https://www.genecards.org/cgi-bin/carddisp.pl?gene=AFAP1</a>     |
| ARHGEF1 | Rho Guanine Nucleotide Exchange Factor 11        | Protein Coding | 48 | GC01M156934 | 1.134341598 | <a href="https://www.genecards.org/cgi-bin/carddisp.pl?gene=ARHGEF1">https://www.genecards.org/cgi-bin/carddisp.pl?gene=ARHGEF1</a> |
| CTRL    | Chymotrypsin Like                                | Protein Coding | 47 | GC16M067927 | 1.133171082 | <a href="https://www.genecards.org/cgi-bin/carddisp.pl?gene=CTRL">https://www.genecards.org/cgi-bin/carddisp.pl?gene=CTRL</a>       |
| MCF2    | MCF.2 Cell Line Derived Transforming Sequence    | Protein Coding | 47 | GC0XM139581 | 1.130852818 | <a href="https://www.genecards.org/cgi-bin/carddisp.pl?gene=MCF2">https://www.genecards.org/cgi-bin/carddisp.pl?gene=MCF2</a>       |
| GLRA4   | Glycine Receptor Alpha 4 (Pseudogene)            | Pseudogene     | 32 | GC0XM103707 | 1.126724005 | <a href="https://www.genecards.org/cgi-bin/carddisp.pl?gene=GLRA4">https://www.genecards.org/cgi-bin/carddisp.pl?gene=GLRA4</a>     |
| NCK1    | NCK Adaptor Protein 1                            | Protein Coding | 50 | GC03P136862 | 1.126284242 | <a href="https://www.genecards.org/cgi-bin/carddisp.pl?gene=NCK1">https://www.genecards.org/cgi-bin/carddisp.pl?gene=NCK1</a>       |
| FGF5    | Fibroblast Growth Factor 5                       | Protein Coding | 50 | GC04P080266 | 1.118101239 | <a href="https://www.genecards.org/cgi-bin/carddisp.pl?gene=FGF5">https://www.genecards.org/cgi-bin/carddisp.pl?gene=FGF5</a>       |
| HDAC10  | Histone Deacetylase 10                           | Protein Coding | 51 | GC22M050245 | 1.117851496 | <a href="https://www.genecards.org/cgi-bin/carddisp.pl?gene=HDAC10">https://www.genecards.org/cgi-bin/carddisp.pl?gene=HDAC10</a>   |

|          |                                                                  |                |    |             |             |                                                                                                                                       |
|----------|------------------------------------------------------------------|----------------|----|-------------|-------------|---------------------------------------------------------------------------------------------------------------------------------------|
| VGLL3    | Vestigial Like Family Member 3                                   | Protein Coding | 41 | GC03M086876 | 1.116021156 | <a href="https://www.genecards.org/cgi-bin/carddisp.pl?gene=VGLL3">https://www.genecards.org/cgi-bin/carddisp.pl?gene=VGLL3</a>       |
| HCLS1    | Hematopoietic Cell-Specific Lyn Substrate 1                      | Protein Coding | 50 | GC03M121631 | 1.114315152 | <a href="https://www.genecards.org/cgi-bin/carddisp.pl?gene=HCLS1">https://www.genecards.org/cgi-bin/carddisp.pl?gene=HCLS1</a>       |
| LY9      | Lymphocyte Antigen 9                                             | Protein Coding | 47 | GC01P160796 | 1.113487959 | <a href="https://www.genecards.org/cgi-bin/carddisp.pl?gene=LY9">https://www.genecards.org/cgi-bin/carddisp.pl?gene=LY9</a>           |
| MYO6     | Myosin VI                                                        | Protein Coding | 51 | GC06P075749 | 1.11263597  | <a href="https://www.genecards.org/cgi-bin/carddisp.pl?gene=MYO6">https://www.genecards.org/cgi-bin/carddisp.pl?gene=MYO6</a>         |
| MMP16    | Matrix Metalloproteinase 16                                      | Protein Coding | 52 | GC08M088032 | 1.110368371 | <a href="https://www.genecards.org/cgi-bin/carddisp.pl?gene=MMP16">https://www.genecards.org/cgi-bin/carddisp.pl?gene=MMP16</a>       |
| CARD16   | Caspase Recruitment Domain Family Member 16                      | Protein Coding | 40 | GC11M105041 | 1.109456182 | <a href="https://www.genecards.org/cgi-bin/carddisp.pl?gene=CARD16">https://www.genecards.org/cgi-bin/carddisp.pl?gene=CARD16</a>     |
| IL12RB2  | Interleukin 12 Receptor Subunit Beta 2                           | Protein Coding | 51 | GC01P067307 | 1.108985543 | <a href="https://www.genecards.org/cgi-bin/carddisp.pl?gene=IL12RB2">https://www.genecards.org/cgi-bin/carddisp.pl?gene=IL12RB2</a>   |
| EPHB1    | EPH Receptor B1                                                  | Protein Coding | 55 | GC03P134795 | 1.108498573 | <a href="https://www.genecards.org/cgi-bin/carddisp.pl?gene=EPHB1">https://www.genecards.org/cgi-bin/carddisp.pl?gene=EPHB1</a>       |
| EPHA8    | EPH Receptor A8                                                  | Protein Coding | 51 | GC01P022563 | 1.108498573 | <a href="https://www.genecards.org/cgi-bin/carddisp.pl?gene=EPHA8">https://www.genecards.org/cgi-bin/carddisp.pl?gene=EPHA8</a>       |
| PTPN7    | Protein Tyrosine Phosphatase Non-Receptor Type 7                 | Protein Coding | 51 | GC01M202147 | 1.108498573 | <a href="https://www.genecards.org/cgi-bin/carddisp.pl?gene=PTPN7">https://www.genecards.org/cgi-bin/carddisp.pl?gene=PTPN7</a>       |
| ARC      | Activity Regulated Cytoskeleton Associated Protein               | Protein Coding | 43 | GC08M142611 | 1.108227015 | <a href="https://www.genecards.org/cgi-bin/carddisp.pl?gene=ARC">https://www.genecards.org/cgi-bin/carddisp.pl?gene=ARC</a>           |
| AKAP12   | A-Kinase Anchoring Protein 12                                    | Protein Coding | 48 | GC06P151239 | 1.107064486 | <a href="https://www.genecards.org/cgi-bin/carddisp.pl?gene=AKAP12">https://www.genecards.org/cgi-bin/carddisp.pl?gene=AKAP12</a>     |
| TRPC1    | Transient Receptor Potential Cation Channel Subfamily C Member 1 | Protein Coding | 48 | GC03P142724 | 1.106306195 | <a href="https://www.genecards.org/cgi-bin/carddisp.pl?gene=TRPC1">https://www.genecards.org/cgi-bin/carddisp.pl?gene=TRPC1</a>       |
| C19orf48 | Chromosome 19 Putative Open Reading Frame 48                     | Pseudogene     | 36 | GC19M050797 | 1.105926037 | <a href="https://www.genecards.org/cgi-bin/carddisp.pl?gene=C19orf48">https://www.genecards.org/cgi-bin/carddisp.pl?gene=C19orf48</a> |
| MUC2     | Mucin 2, Oligomeric Mucus/Gel-Forming                            | Protein Coding | 44 | GC11P001074 | 1.104578614 | <a href="https://www.genecards.org/cgi-bin/carddisp.pl?gene=MUC2">https://www.genecards.org/cgi-bin/carddisp.pl?gene=MUC2</a>         |

|         |                                                                                       |                |    |             |             |                                                                                                                                     |
|---------|---------------------------------------------------------------------------------------|----------------|----|-------------|-------------|-------------------------------------------------------------------------------------------------------------------------------------|
| KRT20   | Keratin 20                                                                            | Protein Coding | 46 | GC17M040875 | 1.095470786 | <a href="https://www.genecards.org/cgi-bin/carddisp.pl?gene=KRT20">https://www.genecards.org/cgi-bin/carddisp.pl?gene=KRT20</a>     |
| KIR2DS4 | Killer Cell Immunoglobulin Like Receptor, Two Ig Domains And Short Cytoplasmic Tail 4 | Protein Coding | 37 | GC19P073504 | 1.095470786 | <a href="https://www.genecards.org/cgi-bin/carddisp.pl?gene=KIR2DS4">https://www.genecards.org/cgi-bin/carddisp.pl?gene=KIR2DS4</a> |
| NAA30   | N-Alpha-Acetyltransferase 30, NatC Catalytic Subunit                                  | Protein Coding | 44 | GC14P057390 | 1.092493534 | <a href="https://www.genecards.org/cgi-bin/carddisp.pl?gene=NAA30">https://www.genecards.org/cgi-bin/carddisp.pl?gene=NAA30</a>     |
| EPHB3   | EPH Receptor B3                                                                       | Protein Coding | 53 | GC03P184561 | 1.091133595 | <a href="https://www.genecards.org/cgi-bin/carddisp.pl?gene=EPHB3">https://www.genecards.org/cgi-bin/carddisp.pl?gene=EPHB3</a>     |
| CDK20   | Cyclin Dependent Kinase 20                                                            | Protein Coding | 49 | GC09M087966 | 1.091133595 | <a href="https://www.genecards.org/cgi-bin/carddisp.pl?gene=CDK20">https://www.genecards.org/cgi-bin/carddisp.pl?gene=CDK20</a>     |
| PTPRR   | Protein Tyrosine Phosphatase Receptor Type R                                          | Protein Coding | 45 | GC12M070638 | 1.091133595 | <a href="https://www.genecards.org/cgi-bin/carddisp.pl?gene=PTPRR">https://www.genecards.org/cgi-bin/carddisp.pl?gene=PTPRR</a>     |
| ZFP36L1 | ZFP36 Ring Finger Protein Like 1                                                      | Protein Coding | 47 | GC14M068787 | 1.089681864 | <a href="https://www.genecards.org/cgi-bin/carddisp.pl?gene=ZFP36L1">https://www.genecards.org/cgi-bin/carddisp.pl?gene=ZFP36L1</a> |
| RAP1B   | RAP1B, Member Of RAS Oncogene Family                                                  | Protein Coding | 50 | GC12P068610 | 1.089631319 | <a href="https://www.genecards.org/cgi-bin/carddisp.pl?gene=RAP1B">https://www.genecards.org/cgi-bin/carddisp.pl?gene=RAP1B</a>     |
| STMN2   | Stathmin 2                                                                            | Protein Coding | 45 | GC08P079610 | 1.086361289 | <a href="https://www.genecards.org/cgi-bin/carddisp.pl?gene=STMN2">https://www.genecards.org/cgi-bin/carddisp.pl?gene=STMN2</a>     |
| ADGRE5  | Adhesion G Protein-Coupled Receptor E5                                                | Protein Coding | 51 | GC19P014880 | 1.082407951 | <a href="https://www.genecards.org/cgi-bin/carddisp.pl?gene=ADGRE5">https://www.genecards.org/cgi-bin/carddisp.pl?gene=ADGRE5</a>   |
| GDF5    | Growth Differentiation Factor 5                                                       | Protein Coding | 52 | GC20M035433 | 1.08078897  | <a href="https://www.genecards.org/cgi-bin/carddisp.pl?gene=GDF5">https://www.genecards.org/cgi-bin/carddisp.pl?gene=GDF5</a>       |
| VAV3    | Vav Guanine Nucleotide Exchange Factor 3                                              | Protein Coding | 50 | GC01M107571 | 1.078908563 | <a href="https://www.genecards.org/cgi-bin/carddisp.pl?gene=VAV3">https://www.genecards.org/cgi-bin/carddisp.pl?gene=VAV3</a>       |
| F2RL2   | Coagulation Factor II Thrombin Receptor Like 2                                        | Protein Coding | 47 | GC05M076615 | 1.078908563 | <a href="https://www.genecards.org/cgi-bin/carddisp.pl?gene=F2RL2">https://www.genecards.org/cgi-bin/carddisp.pl?gene=F2RL2</a>     |
| ANGPTL1 | Angiopoietin Like 1                                                                   | Protein Coding | 46 | GC01M178849 | 1.078908563 | <a href="https://www.genecards.org/cgi-bin/carddisp.pl?gene=ANGPTL1">https://www.genecards.org/cgi-bin/carddisp.pl?gene=ANGPTL1</a> |
| RGS16   | Regulator Of G Protein Signaling 16                                                   | Protein Coding | 46 | GC01M182598 | 1.078908563 | <a href="https://www.genecards.org/cgi-bin/carddisp.pl?gene=RGS16">https://www.genecards.org/cgi-bin/carddisp.pl?gene=RGS16</a>     |

|        |                                                  |                |    |             |             |                                                                                                                                   |
|--------|--------------------------------------------------|----------------|----|-------------|-------------|-----------------------------------------------------------------------------------------------------------------------------------|
| OAS3   | 2'-5'-Oligoadenylate Synthetase 3                | Protein Coding | 46 | GC12P112938 | 1.077958465 | <a href="https://www.genecards.org/cgi-bin/carddisp.pl?gene=OAS3">https://www.genecards.org/cgi-bin/carddisp.pl?gene=OAS3</a>     |
| NMT2   | N-Myristoyltransferase 2                         | Protein Coding | 45 | GC10M015206 | 1.072276354 | <a href="https://www.genecards.org/cgi-bin/carddisp.pl?gene=NMT2">https://www.genecards.org/cgi-bin/carddisp.pl?gene=NMT2</a>     |
| PTPRZ1 | Protein Tyrosine Phosphatase Receptor Type Z1    | Protein Coding | 52 | GC07P121873 | 1.068503141 | <a href="https://www.genecards.org/cgi-bin/carddisp.pl?gene=PTPRZ1">https://www.genecards.org/cgi-bin/carddisp.pl?gene=PTPRZ1</a> |
| PTPN4  | Protein Tyrosine Phosphatase Non-Receptor Type 4 | Protein Coding | 47 | GC02P119759 | 1.068503141 | <a href="https://www.genecards.org/cgi-bin/carddisp.pl?gene=PTPN4">https://www.genecards.org/cgi-bin/carddisp.pl?gene=PTPN4</a>   |
| MT1E   | Metallothionein 1E                               | Protein Coding | 43 | GC16P056625 | 1.067718744 | <a href="https://www.genecards.org/cgi-bin/carddisp.pl?gene=MT1E">https://www.genecards.org/cgi-bin/carddisp.pl?gene=MT1E</a>     |
| F2RL3  | F2R Like Thrombin Or Trypsin Receptor 3          | Protein Coding | 53 | GC19P016888 | 1.067248344 | <a href="https://www.genecards.org/cgi-bin/carddisp.pl?gene=F2RL3">https://www.genecards.org/cgi-bin/carddisp.pl?gene=F2RL3</a>   |
| WWC1   | WW And C2 Domain Containing 1                    | Protein Coding | 47 | GC05P168291 | 1.058328509 | <a href="https://www.genecards.org/cgi-bin/carddisp.pl?gene=WWC1">https://www.genecards.org/cgi-bin/carddisp.pl?gene=WWC1</a>     |
| BTC    | Betacellulin                                     | Protein Coding | 51 | GC04M074744 | 1.054350853 | <a href="https://www.genecards.org/cgi-bin/carddisp.pl?gene=BTC">https://www.genecards.org/cgi-bin/carddisp.pl?gene=BTC</a>       |
| IRF9   | Interferon Regulatory Factor 9                   | Protein Coding | 51 | GC14P024161 | 1.054350853 | <a href="https://www.genecards.org/cgi-bin/carddisp.pl?gene=IRF9">https://www.genecards.org/cgi-bin/carddisp.pl?gene=IRF9</a>     |
| KRT15  | Keratin 15                                       | Protein Coding | 44 | GC17M041513 | 1.054350853 | <a href="https://www.genecards.org/cgi-bin/carddisp.pl?gene=KRT15">https://www.genecards.org/cgi-bin/carddisp.pl?gene=KRT15</a>   |
| GTF3A  | General Transcription Factor IIIA                | Protein Coding | 42 | GC13P027429 | 1.052797198 | <a href="https://www.genecards.org/cgi-bin/carddisp.pl?gene=GTF3A">https://www.genecards.org/cgi-bin/carddisp.pl?gene=GTF3A</a>   |
| C1S    | Complement C1s                                   | Protein Coding | 54 | GC12P023568 | 1.051964879 | <a href="https://www.genecards.org/cgi-bin/carddisp.pl?gene=C1S">https://www.genecards.org/cgi-bin/carddisp.pl?gene=C1S</a>       |
| UNC13C | Unc-13 Homolog C                                 | Protein Coding | 40 | GC15P053838 | 1.048702359 | <a href="https://www.genecards.org/cgi-bin/carddisp.pl?gene=UNC13C">https://www.genecards.org/cgi-bin/carddisp.pl?gene=UNC13C</a> |
| ITGB7  | Integrin Subunit Beta 7                          | Protein Coding | 52 | GC12M053191 | 1.042477012 | <a href="https://www.genecards.org/cgi-bin/carddisp.pl?gene=ITGB7">https://www.genecards.org/cgi-bin/carddisp.pl?gene=ITGB7</a>   |
| CD177  | CD177 Molecule                                   | Protein Coding | 46 | GC19P043353 | 1.040836096 | <a href="https://www.genecards.org/cgi-bin/carddisp.pl?gene=CD177">https://www.genecards.org/cgi-bin/carddisp.pl?gene=CD177</a>   |

|              |                                                            |                    |    |             |             |                                                                                                                                               |
|--------------|------------------------------------------------------------|--------------------|----|-------------|-------------|-----------------------------------------------------------------------------------------------------------------------------------------------|
| GSDMC        | Gasdermin C                                                | Protein Coding     | 40 | GC08M129705 | 1.03986001  | <a href="https://www.genecards.org/cgi-bin/carddisp.pl?gene=GSDMC">https://www.genecards.org/cgi-bin/carddisp.pl?gene=GSDMC</a>               |
| HRG          | Histidine Rich Glycoprotein                                | Protein Coding     | 52 | GC03P186660 | 1.039795876 | <a href="https://www.genecards.org/cgi-bin/carddisp.pl?gene=HRG">https://www.genecards.org/cgi-bin/carddisp.pl?gene=HRG</a>                   |
| EFNA5        | Ephrin A5                                                  | Protein Coding     | 51 | GC05M107376 | 1.039711475 | <a href="https://www.genecards.org/cgi-bin/carddisp.pl?gene=EFNA5">https://www.genecards.org/cgi-bin/carddisp.pl?gene=EFNA5</a>               |
| RASGRF1      | Ras Protein Specific Guanine Nucleotide Releasing Factor 1 | Protein Coding     | 50 | GC15M078959 | 1.039711475 | <a href="https://www.genecards.org/cgi-bin/carddisp.pl?gene=RASGRF1">https://www.genecards.org/cgi-bin/carddisp.pl?gene=RASGRF1</a>           |
| VAV2         | Vav Guanine Nucleotide Exchange Factor 2                   | Protein Coding     | 49 | GC09M133761 | 1.039711475 | <a href="https://www.genecards.org/cgi-bin/carddisp.pl?gene=VAV2">https://www.genecards.org/cgi-bin/carddisp.pl?gene=VAV2</a>                 |
| DSG3         | Desmoglein 3                                               | Protein Coding     | 48 | GC18P031447 | 1.039711475 | <a href="https://www.genecards.org/cgi-bin/carddisp.pl?gene=DSG3">https://www.genecards.org/cgi-bin/carddisp.pl?gene=DSG3</a>                 |
| NCK2         | NCK Adaptor Protein 2                                      | Protein Coding     | 48 | GC02P105744 | 1.039711475 | <a href="https://www.genecards.org/cgi-bin/carddisp.pl?gene=NCK2">https://www.genecards.org/cgi-bin/carddisp.pl?gene=NCK2</a>                 |
| SLAMF6       | SLAM Family Member 6                                       | Protein Coding     | 47 | GC01M160454 | 1.039711475 | <a href="https://www.genecards.org/cgi-bin/carddisp.pl?gene=SLAMF6">https://www.genecards.org/cgi-bin/carddisp.pl?gene=SLAMF6</a>             |
| GEM          | GTP Binding Protein Overexpressed In Skeletal Muscle       | Protein Coding     | 46 | GC08M094249 | 1.039711475 | <a href="https://www.genecards.org/cgi-bin/carddisp.pl?gene=GEM">https://www.genecards.org/cgi-bin/carddisp.pl?gene=GEM</a>                   |
| RHBDF1       | Rhomoid 5 Homolog 1                                        | Protein Coding     | 45 | GC16M000058 | 1.039711475 | <a href="https://www.genecards.org/cgi-bin/carddisp.pl?gene=RHBDF1">https://www.genecards.org/cgi-bin/carddisp.pl?gene=RHBDF1</a>             |
| SIGLEC12     | Sialic Acid Binding Ig Like Lectin 12                      | Protein Coding     | 45 | GC19M051491 | 1.039711475 | <a href="https://www.genecards.org/cgi-bin/carddisp.pl?gene=SIGLEC12">https://www.genecards.org/cgi-bin/carddisp.pl?gene=SIGLEC12</a>         |
| ERRFI1       | ERBB Receptor Feedback Inhibitor 1                         | Protein Coding     | 43 | GC01M008004 | 1.039711475 | <a href="https://www.genecards.org/cgi-bin/carddisp.pl?gene=ERRFI1">https://www.genecards.org/cgi-bin/carddisp.pl?gene=ERRFI1</a>             |
| GRM8         | Glutamate Metabotropic Receptor 8                          | Protein Coding     | 53 | GC07M126438 | 1.037789106 | <a href="https://www.genecards.org/cgi-bin/carddisp.pl?gene=GRM8">https://www.genecards.org/cgi-bin/carddisp.pl?gene=GRM8</a>                 |
| IL17RD       | Interleukin 17 Receptor D                                  | Protein Coding     | 52 | GC03M057089 | 1.029799223 | <a href="https://www.genecards.org/cgi-bin/carddisp.pl?gene=IL17RD">https://www.genecards.org/cgi-bin/carddisp.pl?gene=IL17RD</a>             |
| LOC111674472 | DNase I Hypersensitive Sites In Introns 16 And 17a Of CFTR | Functional Element | 4  | GC07P117607 | 1.027813554 | <a href="https://www.genecards.org/cgi-bin/carddisp.pl?gene=LOC111674472">https://www.genecards.org/cgi-bin/carddisp.pl?gene=LOC111674472</a> |

|         |                                                                      |                |    |             |             |                                                                                                                                     |
|---------|----------------------------------------------------------------------|----------------|----|-------------|-------------|-------------------------------------------------------------------------------------------------------------------------------------|
| NRCAM   | Neuronal Cell Adhesion Molecule                                      | Protein Coding | 51 | GC07M108147 | 1.022346497 | <a href="https://www.genecards.org/cgi-bin/carddisp.pl?gene=NRCAM">https://www.genecards.org/cgi-bin/carddisp.pl?gene=NRCAM</a>     |
| CD300A  | CD300a Molecule                                                      | Protein Coding | 47 | GC17P074466 | 1.022346497 | <a href="https://www.genecards.org/cgi-bin/carddisp.pl?gene=CD300A">https://www.genecards.org/cgi-bin/carddisp.pl?gene=CD300A</a>   |
| HTN3    | Histatin 3                                                           | Protein Coding | 38 | GC04P070028 | 1.022087574 | <a href="https://www.genecards.org/cgi-bin/carddisp.pl?gene=HTN3">https://www.genecards.org/cgi-bin/carddisp.pl?gene=HTN3</a>       |
| GJA4    | Gap Junction Protein Alpha 4                                         | Protein Coding | 50 | GC01P034792 | 1.019160032 | <a href="https://www.genecards.org/cgi-bin/carddisp.pl?gene=GJA4">https://www.genecards.org/cgi-bin/carddisp.pl?gene=GJA4</a>       |
| EPHA5   | EPH Receptor A5                                                      | Protein Coding | 53 | GC04M065319 | 1.013868332 | <a href="https://www.genecards.org/cgi-bin/carddisp.pl?gene=EPHA5">https://www.genecards.org/cgi-bin/carddisp.pl?gene=EPHA5</a>     |
| CDKL1   | Cyclin Dependent Kinase Like 1                                       | Protein Coding | 46 | GC14M050330 | 1.013868332 | <a href="https://www.genecards.org/cgi-bin/carddisp.pl?gene=CDKL1">https://www.genecards.org/cgi-bin/carddisp.pl?gene=CDKL1</a>     |
| SEMA3B  | Semaphorin 3B                                                        | Protein Coding | 47 | GC03P050267 | 1.013504267 | <a href="https://www.genecards.org/cgi-bin/carddisp.pl?gene=SEMA3B">https://www.genecards.org/cgi-bin/carddisp.pl?gene=SEMA3B</a>   |
| METTL2B | Methyltransferase 2B, Methylcytidine                                 | Protein Coding | 40 | GC07P132479 | 1.013077974 | <a href="https://www.genecards.org/cgi-bin/carddisp.pl?gene=METTL2B">https://www.genecards.org/cgi-bin/carddisp.pl?gene=METTL2B</a> |
| PAG1    | Phosphoprotein Membrane Anchor With Glycosphingolipid Microdomains 1 | Protein Coding | 46 | GC08M080967 | 1.012400031 | <a href="https://www.genecards.org/cgi-bin/carddisp.pl?gene=PAG1">https://www.genecards.org/cgi-bin/carddisp.pl?gene=PAG1</a>       |
| INA     | Internexin Neuronal Intermediate Filament Protein Alpha              | Protein Coding | 45 | GC10P103277 | 1.011909842 | <a href="https://www.genecards.org/cgi-bin/carddisp.pl?gene=INA">https://www.genecards.org/cgi-bin/carddisp.pl?gene=INA</a>         |
| SLC17A6 | Solute Carrier Family 17 Member 6                                    | Protein Coding | 47 | GC11P022359 | 1.005619407 | <a href="https://www.genecards.org/cgi-bin/carddisp.pl?gene=SLC17A6">https://www.genecards.org/cgi-bin/carddisp.pl?gene=SLC17A6</a> |
| NPTX1   | Neuronal Pentraxin 1                                                 | Protein Coding | 47 | GC17M080466 | 1.002447128 | <a href="https://www.genecards.org/cgi-bin/carddisp.pl?gene=NPTX1">https://www.genecards.org/cgi-bin/carddisp.pl?gene=NPTX1</a>     |
| IL5RA   | Interleukin 5 Receptor Subunit Alpha                                 | Protein Coding | 53 | GC03M003066 | 1.001373172 | <a href="https://www.genecards.org/cgi-bin/carddisp.pl?gene=IL5RA">https://www.genecards.org/cgi-bin/carddisp.pl?gene=IL5RA</a>     |
| LGR6    | Leucine Rich Repeat Containing G Protein-Coupled Receptor 6          | Protein Coding | 48 | GC01P202193 | 1.000739813 | <a href="https://www.genecards.org/cgi-bin/carddisp.pl?gene=LGR6">https://www.genecards.org/cgi-bin/carddisp.pl?gene=LGR6</a>       |
| SNX1    | Sorting Nexin 1                                                      | Protein Coding | 46 | GC15P064094 | 1.000739813 | <a href="https://www.genecards.org/cgi-bin/carddisp.pl?gene=SNX1">https://www.genecards.org/cgi-bin/carddisp.pl?gene=SNX1</a>       |

|             |                                                                                      |                |    |             |             |                                                                                                                                             |
|-------------|--------------------------------------------------------------------------------------|----------------|----|-------------|-------------|---------------------------------------------------------------------------------------------------------------------------------------------|
| KIR2DL3     | Killer Cell Immunoglobulin Like Receptor, Two Ig Domains And Long Cytoplasmic Tail 3 | Protein Coding | 43 | GC19P074381 | 1.000186682 | <a href="https://www.genecards.org/cgi-bin/carddisp.pl?gene=KIR2DL3">https://www.genecards.org/cgi-bin/carddisp.pl?gene=KIR2DL3</a>         |
| KLRB1       | Killer Cell Lectin Like Receptor B1                                                  | Protein Coding | 47 | GC12M022622 | 0.999716043 | <a href="https://www.genecards.org/cgi-bin/carddisp.pl?gene=KLRB1">https://www.genecards.org/cgi-bin/carddisp.pl?gene=KLRB1</a>             |
| PITX3       | Paired Like Homeodomain 3                                                            | Protein Coding | 46 | GC10M102230 | 0.999716043 | <a href="https://www.genecards.org/cgi-bin/carddisp.pl?gene=PITX3">https://www.genecards.org/cgi-bin/carddisp.pl?gene=PITX3</a>             |
| GPR182      | G Protein-Coupled Receptor 182                                                       | Protein Coding | 44 | GC12P056994 | 0.999716043 | <a href="https://www.genecards.org/cgi-bin/carddisp.pl?gene=GPR182">https://www.genecards.org/cgi-bin/carddisp.pl?gene=GPR182</a>           |
| CHRNE       | Cholinergic Receptor Nicotinic Epsilon Subunit                                       | Protein Coding | 51 | GC17M004897 | 0.999406278 | <a href="https://www.genecards.org/cgi-bin/carddisp.pl?gene=CHRNE">https://www.genecards.org/cgi-bin/carddisp.pl?gene=CHRNE</a>             |
| TUB         | TUB Bipartite Transcription Factor                                                   | Protein Coding | 50 | GC11P008040 | 0.994702637 | <a href="https://www.genecards.org/cgi-bin/carddisp.pl?gene=TUB">https://www.genecards.org/cgi-bin/carddisp.pl?gene=TUB</a>                 |
| EPS8        | Epidermal Growth Factor Receptor Pathway Substrate 8                                 | Protein Coding | 52 | GC12M022709 | 0.987842262 | <a href="https://www.genecards.org/cgi-bin/carddisp.pl?gene=EPS8">https://www.genecards.org/cgi-bin/carddisp.pl?gene=EPS8</a>               |
| UBASH3B     | Ubiquitin Associated And SH3 Domain Containing B                                     | Protein Coding | 48 | GC11P122655 | 0.987842262 | <a href="https://www.genecards.org/cgi-bin/carddisp.pl?gene=UBASH3B">https://www.genecards.org/cgi-bin/carddisp.pl?gene=UBASH3B</a>         |
| ASAP1       | ArfGAP With SH3 Domain, Ankyrin Repeat And PH Domain 1                               | Protein Coding | 47 | GC08M130052 | 0.987842262 | <a href="https://www.genecards.org/cgi-bin/carddisp.pl?gene=ASAP1">https://www.genecards.org/cgi-bin/carddisp.pl?gene=ASAP1</a>             |
| SKAP2       | Src Kinase Associated Phosphoprotein 2                                               | Protein Coding | 46 | GC07M026654 | 0.987842262 | <a href="https://www.genecards.org/cgi-bin/carddisp.pl?gene=SKAP2">https://www.genecards.org/cgi-bin/carddisp.pl?gene=SKAP2</a>             |
| KCNA2       | Potassium Voltage-Gated Channel Subfamily A Member 2                                 | Protein Coding | 53 | GC01M110519 | 0.985289454 | <a href="https://www.genecards.org/cgi-bin/carddisp.pl?gene=KCNA2">https://www.genecards.org/cgi-bin/carddisp.pl?gene=KCNA2</a>             |
| IGF2BP2-AS1 | IGF2BP2 Antisense RNA 1                                                              | RNA Gene       | 26 | GC03P185620 | 0.982193828 | <a href="https://www.genecards.org/cgi-bin/carddisp.pl?gene=IGF2BP2-AS1">https://www.genecards.org/cgi-bin/carddisp.pl?gene=IGF2BP2-AS1</a> |
| SKAP1       | Src Kinase Associated Phosphoprotein 1                                               | Protein Coding | 45 | GC17M048133 | 0.980487883 | <a href="https://www.genecards.org/cgi-bin/carddisp.pl?gene=SKAP1">https://www.genecards.org/cgi-bin/carddisp.pl?gene=SKAP1</a>             |
| NAA60       | N-Alpha-Acetyltransferase 60, NatF Catalytic Subunit                                 | Protein Coding | 43 | GC16P003443 | 0.97929728  | <a href="https://www.genecards.org/cgi-bin/carddisp.pl?gene=NAA60">https://www.genecards.org/cgi-bin/carddisp.pl?gene=NAA60</a>             |
| PURA        | Purine Rich Element Binding Protein A                                                | Protein Coding | 51 | GC05P140076 | 0.976546884 | <a href="https://www.genecards.org/cgi-bin/carddisp.pl?gene=PURA">https://www.genecards.org/cgi-bin/carddisp.pl?gene=PURA</a>               |

|         |                                                    |                |    |             |             |                                                                                                                                       |
|---------|----------------------------------------------------|----------------|----|-------------|-------------|---------------------------------------------------------------------------------------------------------------------------------------|
| MEOX2   | Mesenchyme Homeobox 2                              | Protein Coding | 46 | GC07M015617 | 0.976295114 | <a href="https://www.genecards.org/cgi-bin/carddisp.pl?gene=MEOX2">https://www.genecards.org/cgi-bin/carddisp.pl?gene=MEOX2</a>       |
| OXER1   | Oxoecosanoid Receptor 1                            | Protein Coding | 45 | GC02M042762 | 0.973202944 | <a href="https://www.genecards.org/cgi-bin/carddisp.pl?gene=OXER1">https://www.genecards.org/cgi-bin/carddisp.pl?gene=OXER1</a>       |
| GRIN3B  | Glutamate Ionotropic Receptor NMDA Type Subunit 3B | Protein Coding | 49 | GC19P001000 | 0.957497299 | <a href="https://www.genecards.org/cgi-bin/carddisp.pl?gene=GRIN3B">https://www.genecards.org/cgi-bin/carddisp.pl?gene=GRIN3B</a>     |
| RIN1    | Ras And Rab Interactor 1                           | Protein Coding | 44 | GC11M099757 | 0.955837965 | <a href="https://www.genecards.org/cgi-bin/carddisp.pl?gene=RIN1">https://www.genecards.org/cgi-bin/carddisp.pl?gene=RIN1</a>         |
| TOM1L1  | Target Of Myb1 Like 1 Membrane Trafficking Protein | Protein Coding | 42 | GC17P062999 | 0.955837965 | <a href="https://www.genecards.org/cgi-bin/carddisp.pl?gene=TOM1L1">https://www.genecards.org/cgi-bin/carddisp.pl?gene=TOM1L1</a>     |
| SH3BGRL | SH3 Domain Binding Glutamate Rich Protein Like 2   | Protein Coding | 40 | GC06P092694 | 0.955837965 | <a href="https://www.genecards.org/cgi-bin/carddisp.pl?gene=SH3BGRL2">https://www.genecards.org/cgi-bin/carddisp.pl?gene=SH3BGRL2</a> |
| FZD9    | Frizzled Class Receptor 9                          | Protein Coding | 51 | GC07P073433 | 0.95253402  | <a href="https://www.genecards.org/cgi-bin/carddisp.pl?gene=FZD9">https://www.genecards.org/cgi-bin/carddisp.pl?gene=FZD9</a>         |
| CADM2   | Cell Adhesion Molecule 2                           | Protein Coding | 47 | GC03P084961 | 0.952244639 | <a href="https://www.genecards.org/cgi-bin/carddisp.pl?gene=CADM2">https://www.genecards.org/cgi-bin/carddisp.pl?gene=CADM2</a>       |
| NUDT6   | Nudix Hydrolase 6                                  | Protein Coding | 43 | GC04M122888 | 0.950953603 | <a href="https://www.genecards.org/cgi-bin/carddisp.pl?gene=NUDT6">https://www.genecards.org/cgi-bin/carddisp.pl?gene=NUDT6</a>       |
| ZDHHC3  | Zinc Finger DHHC-Type Palmitoyltransferase 3       | Protein Coding | 43 | GC03M044915 | 0.950109363 | <a href="https://www.genecards.org/cgi-bin/carddisp.pl?gene=ZDHHC3">https://www.genecards.org/cgi-bin/carddisp.pl?gene=ZDHHC3</a>     |
| PCDH15  | Protocadherin Related 15                           | Protein Coding | 48 | GC10M053802 | 0.946790814 | <a href="https://www.genecards.org/cgi-bin/carddisp.pl?gene=PCDH15">https://www.genecards.org/cgi-bin/carddisp.pl?gene=PCDH15</a>     |
| HGFAC   | HGF Activator                                      | Protein Coding | 48 | GC04P003443 | 0.945081234 | <a href="https://www.genecards.org/cgi-bin/carddisp.pl?gene=HGFAC">https://www.genecards.org/cgi-bin/carddisp.pl?gene=HGFAC</a>       |
| PLXNC1  | Plexin C1                                          | Protein Coding | 47 | GC12P094150 | 0.945081234 | <a href="https://www.genecards.org/cgi-bin/carddisp.pl?gene=PLXNC1">https://www.genecards.org/cgi-bin/carddisp.pl?gene=PLXNC1</a>     |
| SLA2    | Src Like Adaptor 2                                 | Protein Coding | 46 | GC20M036613 | 0.945081234 | <a href="https://www.genecards.org/cgi-bin/carddisp.pl?gene=SLA2">https://www.genecards.org/cgi-bin/carddisp.pl?gene=SLA2</a>         |
| LILRB4  | Leukocyte Immunoglobulin Like Receptor B4          | Protein Coding | 44 | GC19P054643 | 0.945081234 | <a href="https://www.genecards.org/cgi-bin/carddisp.pl?gene=LILRB4">https://www.genecards.org/cgi-bin/carddisp.pl?gene=LILRB4</a>     |

|         |                                                          |                |    |             |             |                                                                                                                                     |
|---------|----------------------------------------------------------|----------------|----|-------------|-------------|-------------------------------------------------------------------------------------------------------------------------------------|
| RASA3   | RAS P21 Protein Activator 3                              | Protein Coding | 44 | GC13M113977 | 0.945081234 | <a href="https://www.genecards.org/cgi-bin/carddisp.pl?gene=RASA3">https://www.genecards.org/cgi-bin/carddisp.pl?gene=RASA3</a>     |
| FCGR2C  | Fc Gamma Receptor IIc (Gene/Pseudogene)                  | Protein Coding | 40 | GC01P161818 | 0.945081234 | <a href="https://www.genecards.org/cgi-bin/carddisp.pl?gene=FCGR2C">https://www.genecards.org/cgi-bin/carddisp.pl?gene=FCGR2C</a>   |
| SPAG4   | Sperm Associated Antigen 4                               | Protein Coding | 40 | GC20P035615 | 0.945081234 | <a href="https://www.genecards.org/cgi-bin/carddisp.pl?gene=SPAG4">https://www.genecards.org/cgi-bin/carddisp.pl?gene=SPAG4</a>     |
| GYPE    | Glycophorin E (MNS Blood Group)                          | Protein Coding | 35 | GC04M143870 | 0.941309452 | <a href="https://www.genecards.org/cgi-bin/carddisp.pl?gene=GYPE">https://www.genecards.org/cgi-bin/carddisp.pl?gene=GYPE</a>       |
| GFRA3   | GDNF Family Receptor Alpha 3                             | Protein Coding | 50 | GC05M138263 | 0.933207512 | <a href="https://www.genecards.org/cgi-bin/carddisp.pl?gene=GFRA3">https://www.genecards.org/cgi-bin/carddisp.pl?gene=GFRA3</a>     |
| GRAP2   | GRB2 Related Adaptor Protein 2                           | Protein Coding | 50 | GC22P045214 | 0.933207512 | <a href="https://www.genecards.org/cgi-bin/carddisp.pl?gene=GRAP2">https://www.genecards.org/cgi-bin/carddisp.pl?gene=GRAP2</a>     |
| STON2   | Stonin 2                                                 | Protein Coding | 41 | GC14M081260 | 0.933207512 | <a href="https://www.genecards.org/cgi-bin/carddisp.pl?gene=STON2">https://www.genecards.org/cgi-bin/carddisp.pl?gene=STON2</a>     |
| GNRH2   | Gonadotropin Releasing Hormone 2                         | Protein Coding | 40 | GC20P003043 | 0.933207512 | <a href="https://www.genecards.org/cgi-bin/carddisp.pl?gene=GNRH2">https://www.genecards.org/cgi-bin/carddisp.pl?gene=GNRH2</a>     |
| MSLN    | Mesothelin                                               | Protein Coding | 50 | GC16P013455 | 0.93258357  | <a href="https://www.genecards.org/cgi-bin/carddisp.pl?gene=MSLN">https://www.genecards.org/cgi-bin/carddisp.pl?gene=MSLN</a>       |
| ECE2    | Endothelin Converting Enzyme 2                           | Protein Coding | 46 | GC03P184276 | 0.928997397 | <a href="https://www.genecards.org/cgi-bin/carddisp.pl?gene=ECE2">https://www.genecards.org/cgi-bin/carddisp.pl?gene=ECE2</a>       |
| S100G   | S100 Calcium Binding Protein G                           | Protein Coding | 42 | GC0XP016668 | 0.925257087 | <a href="https://www.genecards.org/cgi-bin/carddisp.pl?gene=S100G">https://www.genecards.org/cgi-bin/carddisp.pl?gene=S100G</a>     |
| COL17A1 | Collagen Type XVII Alpha 1 Chain                         | Protein Coding | 51 | GC10M104031 | 0.92325455  | <a href="https://www.genecards.org/cgi-bin/carddisp.pl?gene=COL17A1">https://www.genecards.org/cgi-bin/carddisp.pl?gene=COL17A1</a> |
| LNX1    | Ligand Of Numb-Protein X 1                               | Protein Coding | 48 | GC04M053459 | 0.92325455  | <a href="https://www.genecards.org/cgi-bin/carddisp.pl?gene=LNX1">https://www.genecards.org/cgi-bin/carddisp.pl?gene=LNX1</a>       |
| GPR17   | G Protein-Coupled Receptor 17                            | Protein Coding | 48 | GC02P127645 | 0.922787964 | <a href="https://www.genecards.org/cgi-bin/carddisp.pl?gene=GPR17">https://www.genecards.org/cgi-bin/carddisp.pl?gene=GPR17</a>     |
| UBE2NL  | Ubiquitin Conjugating Enzyme E2 N Like (Gene/Pseudogene) | Protein Coding | 31 | GC0XP143884 | 0.920240343 | <a href="https://www.genecards.org/cgi-bin/carddisp.pl?gene=UBE2NL">https://www.genecards.org/cgi-bin/carddisp.pl?gene=UBE2NL</a>   |

|              |                                                                          |                    |    |             |             |                                                                                                                                               |
|--------------|--------------------------------------------------------------------------|--------------------|----|-------------|-------------|-----------------------------------------------------------------------------------------------------------------------------------------------|
| AKAP5        | A-Kinase Anchoring Protein 5                                             | Protein Coding     | 47 | GC14P064465 | 0.917392969 | <a href="https://www.genecards.org/cgi-bin/carddisp.pl?gene=AKAP5">https://www.genecards.org/cgi-bin/carddisp.pl?gene=AKAP5</a>               |
| DAB1         | DAB Adaptor Protein 1                                                    | Protein Coding     | 50 | GC01M056994 | 0.912124336 | <a href="https://www.genecards.org/cgi-bin/carddisp.pl?gene=DAB1">https://www.genecards.org/cgi-bin/carddisp.pl?gene=DAB1</a>                 |
| AFDN         | Afadin, Adherens Junction Formation Factor                               | Protein Coding     | 48 | GC06P167827 | 0.912124336 | <a href="https://www.genecards.org/cgi-bin/carddisp.pl?gene=AFDN">https://www.genecards.org/cgi-bin/carddisp.pl?gene=AFDN</a>                 |
| SLC9A6       | Solute Carrier Family 9 Member A6                                        | Protein Coding     | 53 | GC0XP135985 | 0.905902743 | <a href="https://www.genecards.org/cgi-bin/carddisp.pl?gene=SLC9A6">https://www.genecards.org/cgi-bin/carddisp.pl?gene=SLC9A6</a>             |
| ZDHHC7       | Zinc Finger DHHC-Type Palmitoyltransferase 7                             | Protein Coding     | 43 | GC16M084975 | 0.905520856 | <a href="https://www.genecards.org/cgi-bin/carddisp.pl?gene=ZDHHC7">https://www.genecards.org/cgi-bin/carddisp.pl?gene=ZDHHC7</a>             |
| ZDHHC4       | Zinc Finger DHHC-Type Palmitoyltransferase 4                             | Protein Coding     | 40 | GC07P006577 | 0.905520856 | <a href="https://www.genecards.org/cgi-bin/carddisp.pl?gene=ZDHHC4">https://www.genecards.org/cgi-bin/carddisp.pl?gene=ZDHHC4</a>             |
| JMJD6        | Jumonji Domain Containing 6, Arginine Demethylase And Lysine Hydroxylase | Protein Coding     | 49 | GC17M076718 | 0.904907465 | <a href="https://www.genecards.org/cgi-bin/carddisp.pl?gene=JMJD6">https://www.genecards.org/cgi-bin/carddisp.pl?gene=JMJD6</a>               |
| METAP2       | Methionyl Aminopeptidase 2                                               | Protein Coding     | 52 | GC12P095473 | 0.903258324 | <a href="https://www.genecards.org/cgi-bin/carddisp.pl?gene=METAP2">https://www.genecards.org/cgi-bin/carddisp.pl?gene=METAP2</a>             |
| ABT1         | Activator Of Basal Transcription 1                                       | Protein Coding     | 41 | GC06P091965 | 0.903258324 | <a href="https://www.genecards.org/cgi-bin/carddisp.pl?gene=ABT1">https://www.genecards.org/cgi-bin/carddisp.pl?gene=ABT1</a>                 |
| EDN2         | Endothelin 2                                                             | Protein Coding     | 47 | GC01M041478 | 0.900304377 | <a href="https://www.genecards.org/cgi-bin/carddisp.pl?gene=EDN2">https://www.genecards.org/cgi-bin/carddisp.pl?gene=EDN2</a>                 |
| ZC2HC1A      | Zinc Finger C2HC-Type Containing 1A                                      | Protein Coding     | 38 | GC08P078666 | 0.89760989  | <a href="https://www.genecards.org/cgi-bin/carddisp.pl?gene=ZC2HC1A">https://www.genecards.org/cgi-bin/carddisp.pl?gene=ZC2HC1A</a>           |
| RAB39B       | RAB39B, Member RAS Oncogene Family                                       | Protein Coding     | 44 | GC0XM155259 | 0.896075845 | <a href="https://www.genecards.org/cgi-bin/carddisp.pl?gene=RAB39B">https://www.genecards.org/cgi-bin/carddisp.pl?gene=RAB39B</a>             |
| SLC24A3      | Solute Carrier Family 24 Member 3                                        | Protein Coding     | 46 | GC20P019212 | 0.889909029 | <a href="https://www.genecards.org/cgi-bin/carddisp.pl?gene=SLC24A3">https://www.genecards.org/cgi-bin/carddisp.pl?gene=SLC24A3</a>           |
| DRAM1        | DNA Damage Regulated Autophagy Modulator 1                               | Protein Coding     | 37 | GC12P101877 | 0.887507498 | <a href="https://www.genecards.org/cgi-bin/carddisp.pl?gene=DRAM1">https://www.genecards.org/cgi-bin/carddisp.pl?gene=DRAM1</a>               |
| LOC108663987 | Ataxin 3 Repeat Instability Region                                       | Functional Element | 4  | GC14P092071 | 0.887507498 | <a href="https://www.genecards.org/cgi-bin/carddisp.pl?gene=LOC108663987">https://www.genecards.org/cgi-bin/carddisp.pl?gene=LOC108663987</a> |

|         |                                                                  |                |    |             |             |                                                                                                                                     |
|---------|------------------------------------------------------------------|----------------|----|-------------|-------------|-------------------------------------------------------------------------------------------------------------------------------------|
| ERBIN   | ErbB2 Interacting Protein                                        | Protein Coding | 46 | GC05P065884 | 0.88390404  | <a href="https://www.genecards.org/cgi-bin/carddisp.pl?gene=ERBIN">https://www.genecards.org/cgi-bin/carddisp.pl?gene=ERBIN</a>     |
| TRPC4   | Transient Receptor Potential Cation Channel Subfamily C Member 4 | Protein Coding | 50 | GC13M037638 | 0.878572762 | <a href="https://www.genecards.org/cgi-bin/carddisp.pl?gene=TRPC4">https://www.genecards.org/cgi-bin/carddisp.pl?gene=TRPC4</a>     |
| ARTN    | Artemin                                                          | Protein Coding | 47 | GC01P043933 | 0.878572762 | <a href="https://www.genecards.org/cgi-bin/carddisp.pl?gene=ARTN">https://www.genecards.org/cgi-bin/carddisp.pl?gene=ARTN</a>       |
| LILRA4  | Leukocyte Immunoglobulin Like Receptor A4                        | Protein Coding | 46 | GC19M054333 | 0.878572762 | <a href="https://www.genecards.org/cgi-bin/carddisp.pl?gene=LILRA4">https://www.genecards.org/cgi-bin/carddisp.pl?gene=LILRA4</a>   |
| MUC3B   | Mucin 3B, Cell Surface Associated                                | Protein Coding | 22 | GC07U903146 | 0.878572762 | <a href="https://www.genecards.org/cgi-bin/carddisp.pl?gene=MUC3B">https://www.genecards.org/cgi-bin/carddisp.pl?gene=MUC3B</a>     |
| ATP6V1D | ATPase H <sup>+</sup> Transporting V1 Subunit D                  | Protein Coding | 47 | GC14M067294 | 0.878209412 | <a href="https://www.genecards.org/cgi-bin/carddisp.pl?gene=ATP6V1D">https://www.genecards.org/cgi-bin/carddisp.pl?gene=ATP6V1D</a> |
| MMP25   | Matrix Metalloproteinase 25                                      | Protein Coding | 47 | GC16P013548 | 0.873746693 | <a href="https://www.genecards.org/cgi-bin/carddisp.pl?gene=MMP25">https://www.genecards.org/cgi-bin/carddisp.pl?gene=MMP25</a>     |
| NTN1    | Netrin 1                                                         | Protein Coding | 52 | GC17P011813 | 0.873181343 | <a href="https://www.genecards.org/cgi-bin/carddisp.pl?gene=NTN1">https://www.genecards.org/cgi-bin/carddisp.pl?gene=NTN1</a>       |
| ZMYM2   | Zinc Finger MYM-Type Containing 2                                | Protein Coding | 48 | GC13P020139 | 0.873181343 | <a href="https://www.genecards.org/cgi-bin/carddisp.pl?gene=ZMYM2">https://www.genecards.org/cgi-bin/carddisp.pl?gene=ZMYM2</a>     |
| P2RX1   | Purinergic Receptor P2X 1                                        | Protein Coding | 50 | GC17M003896 | 0.867829382 | <a href="https://www.genecards.org/cgi-bin/carddisp.pl?gene=P2RX1">https://www.genecards.org/cgi-bin/carddisp.pl?gene=P2RX1</a>     |
| CNTN2   | Contactin 2                                                      | Protein Coding | 52 | GC01P205043 | 0.861521125 | <a href="https://www.genecards.org/cgi-bin/carddisp.pl?gene=CNTN2">https://www.genecards.org/cgi-bin/carddisp.pl?gene=CNTN2</a>     |
| LILRB1  | Leukocyte Immunoglobulin Like Receptor B1                        | Protein Coding | 50 | GC19P073495 | 0.861521125 | <a href="https://www.genecards.org/cgi-bin/carddisp.pl?gene=LILRB1">https://www.genecards.org/cgi-bin/carddisp.pl?gene=LILRB1</a>   |
| PAEP    | Progesterone Associated Endometrial Protein                      | Protein Coding | 47 | GC09P135561 | 0.861521125 | <a href="https://www.genecards.org/cgi-bin/carddisp.pl?gene=PAEP">https://www.genecards.org/cgi-bin/carddisp.pl?gene=PAEP</a>       |
| TOB1    | Transducer Of ERBB2, 1                                           | Protein Coding | 47 | GC17M050862 | 0.861521125 | <a href="https://www.genecards.org/cgi-bin/carddisp.pl?gene=TOB1">https://www.genecards.org/cgi-bin/carddisp.pl?gene=TOB1</a>       |
| SLC17A7 | Solute Carrier Family 17 Member 7                                | Protein Coding | 47 | GC19M049429 | 0.850808859 | <a href="https://www.genecards.org/cgi-bin/carddisp.pl?gene=SLC17A7">https://www.genecards.org/cgi-bin/carddisp.pl?gene=SLC17A7</a> |

|   |          |                                          |                |    |             |             |                                                                                                                                         |
|---|----------|------------------------------------------|----------------|----|-------------|-------------|-----------------------------------------------------------------------------------------------------------------------------------------|
|   | RXFP1    | Relaxin Family Peptide Receptor 1        | Protein Coding | 51 | GC04P158315 | 0.848623574 | <a href="https://www.genecards.org/cgi-bin/carddisp.pl?gene=RXFP1">https://www.genecards.org/cgi-bin/carddisp.pl?gene=RXFP1</a>         |
| 5 | ARHGAP3  | Rho GTPase Activating Protein 35         | Protein Coding | 46 | GC19P046860 | 0.848623574 | <a href="https://www.genecards.org/cgi-bin/carddisp.pl?gene=ARHGAP35">https://www.genecards.org/cgi-bin/carddisp.pl?gene=ARHGAP35</a>   |
|   | SHC3     | SHC Adaptor Protein 3                    | Protein Coding | 46 | GC09M089005 | 0.848623574 | <a href="https://www.genecards.org/cgi-bin/carddisp.pl?gene=SHC3">https://www.genecards.org/cgi-bin/carddisp.pl?gene=SHC3</a>           |
|   | SWAP70   | Switching B Cell Complex Subunit SWAP70  | Protein Coding | 46 | GC11P009664 | 0.848623574 | <a href="https://www.genecards.org/cgi-bin/carddisp.pl?gene=SWAP70">https://www.genecards.org/cgi-bin/carddisp.pl?gene=SWAP70</a>       |
|   | SH2D2A   | SH2 Domain Containing 2A                 | Protein Coding | 45 | GC01M156952 | 0.848623574 | <a href="https://www.genecards.org/cgi-bin/carddisp.pl?gene=SH2D2A">https://www.genecards.org/cgi-bin/carddisp.pl?gene=SH2D2A</a>       |
|   | SH3BP5   | SH3 Domain Binding Protein 5             | Protein Coding | 44 | GC03M021849 | 0.848623574 | <a href="https://www.genecards.org/cgi-bin/carddisp.pl?gene=SH3BP5">https://www.genecards.org/cgi-bin/carddisp.pl?gene=SH3BP5</a>       |
|   | TCEAL1   | Transcription Elongation Factor A Like 1 | Protein Coding | 42 | GC0XP103628 | 0.848623574 | <a href="https://www.genecards.org/cgi-bin/carddisp.pl?gene=TCEAL1">https://www.genecards.org/cgi-bin/carddisp.pl?gene=TCEAL1</a>       |
|   | ETV7     | ETS Variant Transcription Factor 7       | Protein Coding | 40 | GC06M071871 | 0.848623574 | <a href="https://www.genecards.org/cgi-bin/carddisp.pl?gene=ETV7">https://www.genecards.org/cgi-bin/carddisp.pl?gene=ETV7</a>           |
| 7 | LOC34496 | Acyl-CoA Thioesterase 7 Pseudogene       | Pseudogene     | 15 | GC04M040045 | 0.848313689 | <a href="https://www.genecards.org/cgi-bin/carddisp.pl?gene=LOC344967">https://www.genecards.org/cgi-bin/carddisp.pl?gene=LOC344967</a> |
|   | KIF5C    | Kinesin Family Member 5C                 | Protein Coding | 48 | GC02P148875 | 0.842474699 | <a href="https://www.genecards.org/cgi-bin/carddisp.pl?gene=KIF5C">https://www.genecards.org/cgi-bin/carddisp.pl?gene=KIF5C</a>         |
|   | ANGPT4   | Angiopoietin 4                           | Protein Coding | 49 | GC20M000869 | 0.833984256 | <a href="https://www.genecards.org/cgi-bin/carddisp.pl?gene=ANGPT4">https://www.genecards.org/cgi-bin/carddisp.pl?gene=ANGPT4</a>       |
|   | DOK2     | Docking Protein 2                        | Protein Coding | 49 | GC08M021908 | 0.833984256 | <a href="https://www.genecards.org/cgi-bin/carddisp.pl?gene=DOK2">https://www.genecards.org/cgi-bin/carddisp.pl?gene=DOK2</a>           |
|   | CD48     | CD48 Molecule                            | Protein Coding | 47 | GC01M160648 | 0.833984256 | <a href="https://www.genecards.org/cgi-bin/carddisp.pl?gene=CD48">https://www.genecards.org/cgi-bin/carddisp.pl?gene=CD48</a>           |
|   | FCAR     | Fc Alpha Receptor                        | Protein Coding | 47 | GC19P073506 | 0.833984256 | <a href="https://www.genecards.org/cgi-bin/carddisp.pl?gene=FCAR">https://www.genecards.org/cgi-bin/carddisp.pl?gene=FCAR</a>           |
|   | ADRA1D   | Adrenoceptor Alpha 1D                    | Protein Coding | 51 | GC20M004220 | 0.828397751 | <a href="https://www.genecards.org/cgi-bin/carddisp.pl?gene=ADRA1D">https://www.genecards.org/cgi-bin/carddisp.pl?gene=ADRA1D</a>       |

|        |                                                           |                                                  |                |             |             |                                                                                                                                   |                                                                                                                                       |
|--------|-----------------------------------------------------------|--------------------------------------------------|----------------|-------------|-------------|-----------------------------------------------------------------------------------------------------------------------------------|---------------------------------------------------------------------------------------------------------------------------------------|
| CHRNA4 | Cholinergic Receptor Nicotinic Beta 4 Subunit             | Protein Coding                                   | 51             | GC15M078624 | 0.817885756 | <a href="https://www.genecards.org/cgi-bin/carddisp.pl?gene=CHRNA4">https://www.genecards.org/cgi-bin/carddisp.pl?gene=CHRNA4</a> |                                                                                                                                       |
| SLAMF1 | Signaling Lymphocytic Activation Molecule Family Member 1 | Protein Coding                                   | 49             | GC01M160608 | 0.816619277 | <a href="https://www.genecards.org/cgi-bin/carddisp.pl?gene=SLAMF1">https://www.genecards.org/cgi-bin/carddisp.pl?gene=SLAMF1</a> |                                                                                                                                       |
| EFNB3  | Ephrin B3                                                 | Protein Coding                                   | 48             | GC17P011746 | 0.816619277 | <a href="https://www.genecards.org/cgi-bin/carddisp.pl?gene=EFNB3">https://www.genecards.org/cgi-bin/carddisp.pl?gene=EFNB3</a>   |                                                                                                                                       |
| GRAP   | GRB2 Related Adaptor Protein                              | Protein Coding                                   | 48             | GC17M050970 | 0.816619277 | <a href="https://www.genecards.org/cgi-bin/carddisp.pl?gene=GRAP">https://www.genecards.org/cgi-bin/carddisp.pl?gene=GRAP</a>     |                                                                                                                                       |
| 2      | ARHGAP3                                                   | Rho GTPase Activating Protein 32                 | Protein Coding | 46          | GC11M128965 | 0.816619277                                                                                                                       | <a href="https://www.genecards.org/cgi-bin/carddisp.pl?gene=ARHGAP32">https://www.genecards.org/cgi-bin/carddisp.pl?gene=ARHGAP32</a> |
|        | SH2D1B                                                    | SH2 Domain Containing 1B                         | Protein Coding | 44          | GC01M162395 | 0.816619277                                                                                                                       | <a href="https://www.genecards.org/cgi-bin/carddisp.pl?gene=SH2D1B">https://www.genecards.org/cgi-bin/carddisp.pl?gene=SH2D1B</a>     |
|        | ERVW-1                                                    | Endogenous Retrovirus Group W Member 1, Envelope | Protein Coding | 42          | GC07M092468 | 0.816619277                                                                                                                       | <a href="https://www.genecards.org/cgi-bin/carddisp.pl?gene=ERVW-1">https://www.genecards.org/cgi-bin/carddisp.pl?gene=ERVW-1</a>     |
|        | INSL4                                                     | Insulin Like 4                                   | Protein Coding | 39          | GC09P005231 | 0.816619277                                                                                                                       | <a href="https://www.genecards.org/cgi-bin/carddisp.pl?gene=INSL4">https://www.genecards.org/cgi-bin/carddisp.pl?gene=INSL4</a>       |
|        | ZDHHC9                                                    | Zinc Finger DHHC-Type Palmitoyltransferase 9     | Protein Coding | 50          | GC0XM129803 | 0.810890675                                                                                                                       | <a href="https://www.genecards.org/cgi-bin/carddisp.pl?gene=ZDHHC9">https://www.genecards.org/cgi-bin/carddisp.pl?gene=ZDHHC9</a>     |
|        | ZDHHC11                                                   | Zinc Finger DHHC-Type Containing 11              | Protein Coding | 41          | GC05M000795 | 0.810890675                                                                                                                       | <a href="https://www.genecards.org/cgi-bin/carddisp.pl?gene=ZDHHC11">https://www.genecards.org/cgi-bin/carddisp.pl?gene=ZDHHC11</a>   |
| B      | ZDHHC11                                                   | Zinc Finger DHHC-Type Containing 11B             | Protein Coding | 32          | GC05M000710 | 0.810890675                                                                                                                       | <a href="https://www.genecards.org/cgi-bin/carddisp.pl?gene=ZDHHC11B">https://www.genecards.org/cgi-bin/carddisp.pl?gene=ZDHHC11B</a> |
|        | INTS2                                                     | Integrator Complex Subunit 2                     | Protein Coding | 40          | GC17M061865 | 0.804532051                                                                                                                       | <a href="https://www.genecards.org/cgi-bin/carddisp.pl?gene=INTS2">https://www.genecards.org/cgi-bin/carddisp.pl?gene=INTS2</a>       |
|        | DPYSL3                                                    | Dihydropyrimidinase Like 3                       | Protein Coding | 46          | GC05M147390 | 0.798763692                                                                                                                       | <a href="https://www.genecards.org/cgi-bin/carddisp.pl?gene=DPYSL3">https://www.genecards.org/cgi-bin/carddisp.pl?gene=DPYSL3</a>     |
|        | GZMA                                                      | Granzyme A                                       | Protein Coding | 50          | GC05P055102 | 0.793988824                                                                                                                       | <a href="https://www.genecards.org/cgi-bin/carddisp.pl?gene=GZMA">https://www.genecards.org/cgi-bin/carddisp.pl?gene=GZMA</a>         |
|        | RPH3A                                                     | Rabphilin 3A                                     | Protein Coding | 46          | GC12P112570 | 0.793988824                                                                                                                       | <a href="https://www.genecards.org/cgi-bin/carddisp.pl?gene=RPH3A">https://www.genecards.org/cgi-bin/carddisp.pl?gene=RPH3A</a>       |

|         |                                                                 |                |    |             |             |                                                                                                                                       |
|---------|-----------------------------------------------------------------|----------------|----|-------------|-------------|---------------------------------------------------------------------------------------------------------------------------------------|
| SEZ6L2  | Seizure Related 6 Homolog Like 2                                | Protein Coding | 46 | GC16M038421 | 0.793988824 | <a href="https://www.genecards.org/cgi-bin/carddisp.pl?gene=SEZ6L2">https://www.genecards.org/cgi-bin/carddisp.pl?gene=SEZ6L2</a>     |
| CNKSR1  | Connector Enhancer Of Kinase Suppressor Of Ras 1                | Protein Coding | 44 | GC01P026178 | 0.793988824 | <a href="https://www.genecards.org/cgi-bin/carddisp.pl?gene=CNKSR1">https://www.genecards.org/cgi-bin/carddisp.pl?gene=CNKSR1</a>     |
| FRS3    | Fibroblast Growth Factor Receptor Substrate 3                   | Protein Coding | 40 | GC06M071935 | 0.793988824 | <a href="https://www.genecards.org/cgi-bin/carddisp.pl?gene=FRS3">https://www.genecards.org/cgi-bin/carddisp.pl?gene=FRS3</a>         |
| PTPRCAP | Protein Tyrosine Phosphatase Receptor Type C Associated Protein | Protein Coding | 40 | GC11M099809 | 0.793988824 | <a href="https://www.genecards.org/cgi-bin/carddisp.pl?gene=PTPRCAP">https://www.genecards.org/cgi-bin/carddisp.pl?gene=PTPRCAP</a>   |
| OCM2    | Oncomodulin 2                                                   | Protein Coding | 33 | GC07M097984 | 0.793988824 | <a href="https://www.genecards.org/cgi-bin/carddisp.pl?gene=OCM2">https://www.genecards.org/cgi-bin/carddisp.pl?gene=OCM2</a>         |
| AAVS1   | Adeno-Associated Virus Integration Site 1                       | Genetic Locus  | 6  | GC19U990001 | 0.793988824 | <a href="https://www.genecards.org/cgi-bin/carddisp.pl?gene=AAVS1">https://www.genecards.org/cgi-bin/carddisp.pl?gene=AAVS1</a>       |
| NM      | Neutrophil Migration                                            | Genetic Locus  | 6  | GC07U990060 | 0.793988824 | <a href="https://www.genecards.org/cgi-bin/carddisp.pl?gene=NM">https://www.genecards.org/cgi-bin/carddisp.pl?gene=NM</a>             |
| ZFP36L2 | ZFP36 Ring Finger Protein Like 2                                | Protein Coding | 44 | GC02M043184 | 0.773427129 | <a href="https://www.genecards.org/cgi-bin/carddisp.pl?gene=ZFP36L2">https://www.genecards.org/cgi-bin/carddisp.pl?gene=ZFP36L2</a>   |
| SLC1A6  | Solute Carrier Family 1 Member 6                                | Protein Coding | 51 | GC19M014921 | 0.773018479 | <a href="https://www.genecards.org/cgi-bin/carddisp.pl?gene=SLC1A6">https://www.genecards.org/cgi-bin/carddisp.pl?gene=SLC1A6</a>     |
| LDC1P   | Leucine Decarboxylase 1, Pseudogene                             | Pseudogene     | 13 | GC01P031501 | 0.771194696 | <a href="https://www.genecards.org/cgi-bin/carddisp.pl?gene=LDC1P">https://www.genecards.org/cgi-bin/carddisp.pl?gene=LDC1P</a>       |
| PDCD1LG | Programmed Cell Death 1 Ligand 2                                | Protein Coding | 50 | GC09P005510 | 0.767283797 | <a href="https://www.genecards.org/cgi-bin/carddisp.pl?gene=PDCD1LG2">https://www.genecards.org/cgi-bin/carddisp.pl?gene=PDCD1LG2</a> |
| IL1RL1  | Interleukin 1 Receptor Like 1                                   | Protein Coding | 48 | GC02P102294 | 0.767182589 | <a href="https://www.genecards.org/cgi-bin/carddisp.pl?gene=IL1RL1">https://www.genecards.org/cgi-bin/carddisp.pl?gene=IL1RL1</a>     |
| C1R     | Complement C1r                                                  | Protein Coding | 53 | GC12M007993 | 0.765953422 | <a href="https://www.genecards.org/cgi-bin/carddisp.pl?gene=C1R">https://www.genecards.org/cgi-bin/carddisp.pl?gene=C1R</a>           |
| PGGT1B  | Protein Geranylgeranyltransferase Type I Subunit Beta           | Protein Coding | 42 | GC05M115200 | 0.741063714 | <a href="https://www.genecards.org/cgi-bin/carddisp.pl?gene=PGGT1B">https://www.genecards.org/cgi-bin/carddisp.pl?gene=PGGT1B</a>     |
| TAPBP   | TAP Binding Protein                                             | Protein Coding | 51 | GC06M033299 | 0.738563597 | <a href="https://www.genecards.org/cgi-bin/carddisp.pl?gene=TAPBP">https://www.genecards.org/cgi-bin/carddisp.pl?gene=TAPBP</a>       |

|         |                                                            |                |    |             |             |                                                                                                                                     |
|---------|------------------------------------------------------------|----------------|----|-------------|-------------|-------------------------------------------------------------------------------------------------------------------------------------|
| HEBP1   | Heme Binding Protein 1                                     | Protein Coding | 40 | GC12M012974 | 0.737105608 | <a href="https://www.genecards.org/cgi-bin/carddisp.pl?gene=HEBP1">https://www.genecards.org/cgi-bin/carddisp.pl?gene=HEBP1</a>     |
| GRIK5   | Glutamate Ionotropic Receptor Kainate Type Subunit 5       | Protein Coding | 52 | GC19M041998 | 0.736668408 | <a href="https://www.genecards.org/cgi-bin/carddisp.pl?gene=GRIK5">https://www.genecards.org/cgi-bin/carddisp.pl?gene=GRIK5</a>     |
| POLH    | DNA Polymerase Eta                                         | Protein Coding | 55 | GC06P043576 | 0.727330506 | <a href="https://www.genecards.org/cgi-bin/carddisp.pl?gene=POLH">https://www.genecards.org/cgi-bin/carddisp.pl?gene=POLH</a>       |
| GTF3C4  | General Transcription Factor IIIC Subunit 4                | Protein Coding | 44 | GC09P132671 | 0.727330506 | <a href="https://www.genecards.org/cgi-bin/carddisp.pl?gene=GTF3C4">https://www.genecards.org/cgi-bin/carddisp.pl?gene=GTF3C4</a>   |
| SHANK3  | SH3 And Multiple Ankyrin Repeat Domains 3                  | Protein Coding | 45 | GC22P050674 | 0.725786924 | <a href="https://www.genecards.org/cgi-bin/carddisp.pl?gene=SHANK3">https://www.genecards.org/cgi-bin/carddisp.pl?gene=SHANK3</a>   |
| H3-4    | H3.4 Histone, Cluster Member                               | Protein Coding | 44 | GC01M228427 | 0.722606659 | <a href="https://www.genecards.org/cgi-bin/carddisp.pl?gene=H3-4">https://www.genecards.org/cgi-bin/carddisp.pl?gene=H3-4</a>       |
| ZDHHC24 | Zinc Finger DHHC-Type Containing 24                        | Protein Coding | 40 | GC11M099766 | 0.714433014 | <a href="https://www.genecards.org/cgi-bin/carddisp.pl?gene=ZDHHC24">https://www.genecards.org/cgi-bin/carddisp.pl?gene=ZDHHC24</a> |
| PADI4   | Peptidyl Arginine Deiminase 4                              | Protein Coding | 51 | GC01P017308 | 0.704137444 | <a href="https://www.genecards.org/cgi-bin/carddisp.pl?gene=PADI4">https://www.genecards.org/cgi-bin/carddisp.pl?gene=PADI4</a>     |
| NAA20   | N-Alpha-Acetyltransferase 20, NatB Catalytic Subunit       | Protein Coding | 47 | GC20P020018 | 0.699793696 | <a href="https://www.genecards.org/cgi-bin/carddisp.pl?gene=NAA20">https://www.genecards.org/cgi-bin/carddisp.pl?gene=NAA20</a>     |
| ZDHHC8  | Zinc Finger DHHC-Type Palmitoyltransferase 8               | Protein Coding | 46 | GC22P020129 | 0.699793696 | <a href="https://www.genecards.org/cgi-bin/carddisp.pl?gene=ZDHHC8">https://www.genecards.org/cgi-bin/carddisp.pl?gene=ZDHHC8</a>   |
| MPDZ    | Multiple PDZ Domain Crumbs Cell Polarity Complex Component | Protein Coding | 50 | GC09M013105 | 0.69947648  | <a href="https://www.genecards.org/cgi-bin/carddisp.pl?gene=MPDZ">https://www.genecards.org/cgi-bin/carddisp.pl?gene=MPDZ</a>       |
| PTMA    | Prothymosin Alpha                                          | Protein Coding | 48 | GC02P231838 | 0.692750692 | <a href="https://www.genecards.org/cgi-bin/carddisp.pl?gene=PTMA">https://www.genecards.org/cgi-bin/carddisp.pl?gene=PTMA</a>       |
| ZDHHC6  | Zinc Finger DHHC-Type Palmitoyltransferase 6               | Protein Coding | 43 | GC10M112430 | 0.682428718 | <a href="https://www.genecards.org/cgi-bin/carddisp.pl?gene=ZDHHC6">https://www.genecards.org/cgi-bin/carddisp.pl?gene=ZDHHC6</a>   |
| JUND    | JunD Proto-Oncogene, AP-1 Transcription Factor Subunit     | Protein Coding | 48 | GC19M018279 | 0.682285666 | <a href="https://www.genecards.org/cgi-bin/carddisp.pl?gene=JUND">https://www.genecards.org/cgi-bin/carddisp.pl?gene=JUND</a>       |
| GRIK3   | Glutamate Ionotropic Receptor Kainate Type Subunit 3       | Protein Coding | 51 | GC01M036795 | 0.680615485 | <a href="https://www.genecards.org/cgi-bin/carddisp.pl?gene=GRIK3">https://www.genecards.org/cgi-bin/carddisp.pl?gene=GRIK3</a>     |

|         |                                               |                |    |             |             |                                                                                                                                     |
|---------|-----------------------------------------------|----------------|----|-------------|-------------|-------------------------------------------------------------------------------------------------------------------------------------|
| HSPE1   | Heat Shock Protein Family E (Hsp10) Member 1  | Protein Coding | 49 | GC02P197501 | 0.67894119  | <a href="https://www.genecards.org/cgi-bin/carddisp.pl?gene=HSPE1">https://www.genecards.org/cgi-bin/carddisp.pl?gene=HSPE1</a>     |
| PDS5B   | PDS5 Cohesin Associated Factor B              | Protein Coding | 44 | GC13P032586 | 0.66158253  | <a href="https://www.genecards.org/cgi-bin/carddisp.pl?gene=PDS5B">https://www.genecards.org/cgi-bin/carddisp.pl?gene=PDS5B</a>     |
| ZDHHC14 | Zinc Finger DHHC-Type Palmitoyltransferase 14 | Protein Coding | 43 | GC06P157381 | 0.659798265 | <a href="https://www.genecards.org/cgi-bin/carddisp.pl?gene=ZDHHC14">https://www.genecards.org/cgi-bin/carddisp.pl?gene=ZDHHC14</a> |
| ZDHHC12 | Zinc Finger DHHC-Type Palmitoyltransferase 12 | Protein Coding | 36 | GC09M128720 | 0.659798265 | <a href="https://www.genecards.org/cgi-bin/carddisp.pl?gene=ZDHHC12">https://www.genecards.org/cgi-bin/carddisp.pl?gene=ZDHHC12</a> |
| RLN2    | Relaxin 2                                     | Protein Coding | 42 | GC09M005438 | 0.655414581 | <a href="https://www.genecards.org/cgi-bin/carddisp.pl?gene=RLN2">https://www.genecards.org/cgi-bin/carddisp.pl?gene=RLN2</a>       |
| OMP     | Olfactory Marker Protein                      | Protein Coding | 42 | GC11P077102 | 0.645645916 | <a href="https://www.genecards.org/cgi-bin/carddisp.pl?gene=OMP">https://www.genecards.org/cgi-bin/carddisp.pl?gene=OMP</a>         |
| NPTX2   | Neuronal Pentraxin 2                          | Protein Coding | 49 | GC07P098620 | 0.642618299 | <a href="https://www.genecards.org/cgi-bin/carddisp.pl?gene=NPTX2">https://www.genecards.org/cgi-bin/carddisp.pl?gene=NPTX2</a>     |
| PPP1R9B | Protein Phosphatase 1 Regulatory Subunit 9B   | Protein Coding | 47 | GC17M050133 | 0.628742099 | <a href="https://www.genecards.org/cgi-bin/carddisp.pl?gene=PPP1R9B">https://www.genecards.org/cgi-bin/carddisp.pl?gene=PPP1R9B</a> |
| TNXA    | Tenascin XA (Pseudogene)                      | Pseudogene     | 27 | GC06M071744 | 0.625919342 | <a href="https://www.genecards.org/cgi-bin/carddisp.pl?gene=TNXA">https://www.genecards.org/cgi-bin/carddisp.pl?gene=TNXA</a>       |
| MYO7A   | Myosin VIIA                                   | Protein Coding | 50 | GC11P077128 | 0.625438094 | <a href="https://www.genecards.org/cgi-bin/carddisp.pl?gene=MYO7A">https://www.genecards.org/cgi-bin/carddisp.pl?gene=MYO7A</a>     |
| ACKR2   | Atypical Chemokine Receptor 2                 | Protein Coding | 47 | GC03P042804 | 0.619987786 | <a href="https://www.genecards.org/cgi-bin/carddisp.pl?gene=ACKR2">https://www.genecards.org/cgi-bin/carddisp.pl?gene=ACKR2</a>     |
| SLC4A10 | Solute Carrier Family 4 Member 10             | Protein Coding | 47 | GC02P161425 | 0.609507203 | <a href="https://www.genecards.org/cgi-bin/carddisp.pl?gene=SLC4A10">https://www.genecards.org/cgi-bin/carddisp.pl?gene=SLC4A10</a> |
| ZDHHC15 | Zinc Finger DHHC-Type Palmitoyltransferase 15 | Protein Coding | 44 | GC0XM075368 | 0.605163455 | <a href="https://www.genecards.org/cgi-bin/carddisp.pl?gene=ZDHHC15">https://www.genecards.org/cgi-bin/carddisp.pl?gene=ZDHHC15</a> |
| ZDHHC19 | Zinc Finger DHHC-Type Palmitoyltransferase 19 | Protein Coding | 43 | GC03M196197 | 0.605163455 | <a href="https://www.genecards.org/cgi-bin/carddisp.pl?gene=ZDHHC19">https://www.genecards.org/cgi-bin/carddisp.pl?gene=ZDHHC19</a> |
| ZDHHC16 | Zinc Finger DHHC-Type Palmitoyltransferase 16 | Protein Coding | 40 | GC10P097446 | 0.605163455 | <a href="https://www.genecards.org/cgi-bin/carddisp.pl?gene=ZDHHC16">https://www.genecards.org/cgi-bin/carddisp.pl?gene=ZDHHC16</a> |

|         |                                                                  |                |    |             |             |                                                                                                                                     |
|---------|------------------------------------------------------------------|----------------|----|-------------|-------------|-------------------------------------------------------------------------------------------------------------------------------------|
| ZDHHC23 | Zinc Finger DHHC-Type Palmitoyltransferase 23                    | Protein Coding | 40 | GC03P113947 | 0.605163455 | <a href="https://www.genecards.org/cgi-bin/carddisp.pl?gene=ZDHHC23">https://www.genecards.org/cgi-bin/carddisp.pl?gene=ZDHHC23</a> |
| NAA11   | N-Alpha-Acetyltransferase 11, NatA Catalytic Subunit             | Protein Coding | 38 | GC04M079155 | 0.605163455 | <a href="https://www.genecards.org/cgi-bin/carddisp.pl?gene=NAA11">https://www.genecards.org/cgi-bin/carddisp.pl?gene=NAA11</a>     |
| ZDHHC22 | Zinc Finger DHHC-Type Palmitoyltransferase 22                    | Protein Coding | 35 | GC14M077159 | 0.605163455 | <a href="https://www.genecards.org/cgi-bin/carddisp.pl?gene=ZDHHC22">https://www.genecards.org/cgi-bin/carddisp.pl?gene=ZDHHC22</a> |
| GRIK4   | Glutamate Ionotropic Receptor Kainate Type Subunit 4             | Protein Coding | 52 | GC11P120512 | 0.604043722 | <a href="https://www.genecards.org/cgi-bin/carddisp.pl?gene=GRIK4">https://www.genecards.org/cgi-bin/carddisp.pl?gene=GRIK4</a>     |
| GJB6    | Gap Junction Protein Beta 6                                      | Protein Coding | 49 | GC13M020221 | 0.599481165 | <a href="https://www.genecards.org/cgi-bin/carddisp.pl?gene=GJB6">https://www.genecards.org/cgi-bin/carddisp.pl?gene=GJB6</a>       |
| AGAP2   | ArfGAP With GTPase Domain, Ankyrin Repeat And PH Domain 2        | Protein Coding | 47 | GC12M057723 | 0.596378684 | <a href="https://www.genecards.org/cgi-bin/carddisp.pl?gene=AGAP2">https://www.genecards.org/cgi-bin/carddisp.pl?gene=AGAP2</a>     |
| CACNG3  | Calcium Voltage-Gated Channel Auxiliary Subunit Gamma 3          | Protein Coding | 48 | GC16P024615 | 0.595825553 | <a href="https://www.genecards.org/cgi-bin/carddisp.pl?gene=CACNG3">https://www.genecards.org/cgi-bin/carddisp.pl?gene=CACNG3</a>   |
| DCAF4   | DDB1 And CUL4 Associated Factor 4                                | Protein Coding | 38 | GC14P072926 | 0.595719576 | <a href="https://www.genecards.org/cgi-bin/carddisp.pl?gene=DCAF4">https://www.genecards.org/cgi-bin/carddisp.pl?gene=DCAF4</a>     |
| TACR2   | Tachykinin Receptor 2                                            | Protein Coding | 50 | GC10M069403 | 0.584081471 | <a href="https://www.genecards.org/cgi-bin/carddisp.pl?gene=TACR2">https://www.genecards.org/cgi-bin/carddisp.pl?gene=TACR2</a>     |
| TRAK1   | Trafficking Kinesin Protein 1                                    | Protein Coding | 48 | GC03P042020 | 0.580011547 | <a href="https://www.genecards.org/cgi-bin/carddisp.pl?gene=TRAK1">https://www.genecards.org/cgi-bin/carddisp.pl?gene=TRAK1</a>     |
| CCR10   | C-C Motif Chemokine Receptor 10                                  | Protein Coding | 42 | GC17M042678 | 0.534312725 | <a href="https://www.genecards.org/cgi-bin/carddisp.pl?gene=CCR10">https://www.genecards.org/cgi-bin/carddisp.pl?gene=CCR10</a>     |
| TMC2    | Transmembrane Channel Like 2                                     | Protein Coding | 42 | GC20P002536 | 0.529317021 | <a href="https://www.genecards.org/cgi-bin/carddisp.pl?gene=TMC2">https://www.genecards.org/cgi-bin/carddisp.pl?gene=TMC2</a>       |
| TRPM1   | Transient Receptor Potential Cation Channel Subfamily M Member 1 | Protein Coding | 51 | GC15M031001 | 0.490211636 | <a href="https://www.genecards.org/cgi-bin/carddisp.pl?gene=TRPM1">https://www.genecards.org/cgi-bin/carddisp.pl?gene=TRPM1</a>     |
| RSL24D1 | Ribosomal L24 Domain Containing 1                                | Protein Coding | 43 | GC15M055180 | 0.482226133 | <a href="https://www.genecards.org/cgi-bin/carddisp.pl?gene=RSL24D1">https://www.genecards.org/cgi-bin/carddisp.pl?gene=RSL24D1</a> |
| TMEM37  | Transmembrane Protein 37                                         | Protein Coding | 38 | GC02P119429 | 0.465801805 | <a href="https://www.genecards.org/cgi-bin/carddisp.pl?gene=TMEM37">https://www.genecards.org/cgi-bin/carddisp.pl?gene=TMEM37</a>   |

|        |                                                                      |                |    |             |             |                                                                                                                                   |
|--------|----------------------------------------------------------------------|----------------|----|-------------|-------------|-----------------------------------------------------------------------------------------------------------------------------------|
| DEFA1  | Defensin Alpha 1                                                     | Protein Coding | 44 | GC08M006977 | 0.45585534  | <a href="https://www.genecards.org/cgi-bin/carddisp.pl?gene=DEFA1">https://www.genecards.org/cgi-bin/carddisp.pl?gene=DEFA1</a>   |
| KEL    | Kell Metallo-Endopeptidase (Kell Blood Group)                        | Protein Coding | 48 | GC07M143027 | 0.439531475 | <a href="https://www.genecards.org/cgi-bin/carddisp.pl?gene=KEL">https://www.genecards.org/cgi-bin/carddisp.pl?gene=KEL</a>       |
| GRINA  | Glutamate Ionotropic Receptor NMDA Type Subunit Associated Protein 1 | Protein Coding | 40 | GC08P143990 | 0.43129757  | <a href="https://www.genecards.org/cgi-bin/carddisp.pl?gene=GRINA">https://www.genecards.org/cgi-bin/carddisp.pl?gene=GRINA</a>   |
| C4BPA  | Complement Component 4 Binding Protein Alpha                         | Protein Coding | 49 | GC01P207105 | 0.429623127 | <a href="https://www.genecards.org/cgi-bin/carddisp.pl?gene=C4BPA">https://www.genecards.org/cgi-bin/carddisp.pl?gene=C4BPA</a>   |
| RCOR1  | REST Corepressor 1                                                   | Protein Coding | 49 | GC14P102592 | 0.429034412 | <a href="https://www.genecards.org/cgi-bin/carddisp.pl?gene=RCOR1">https://www.genecards.org/cgi-bin/carddisp.pl?gene=RCOR1</a>   |
| TMC1   | Transmembrane Channel Like 1                                         | Protein Coding | 46 | GC09P072521 | 0.390098333 | <a href="https://www.genecards.org/cgi-bin/carddisp.pl?gene=TMC1">https://www.genecards.org/cgi-bin/carddisp.pl?gene=TMC1</a>     |
| CRYBA1 | Crystallin Beta A1                                                   | Protein Coding | 46 | GC17P029246 | 0.389627695 | <a href="https://www.genecards.org/cgi-bin/carddisp.pl?gene=CRYBA1">https://www.genecards.org/cgi-bin/carddisp.pl?gene=CRYBA1</a> |
| TAAR6  | Trace Amine Associated Receptor 6                                    | Protein Coding | 40 | GC06P132570 | 0.389627695 | <a href="https://www.genecards.org/cgi-bin/carddisp.pl?gene=TAAR6">https://www.genecards.org/cgi-bin/carddisp.pl?gene=TAAR6</a>   |
| ZNF521 | Zinc Finger Protein 521                                              | Protein Coding | 43 | GC18M025061 | 0.345749646 | <a href="https://www.genecards.org/cgi-bin/carddisp.pl?gene=ZNF521">https://www.genecards.org/cgi-bin/carddisp.pl?gene=ZNF521</a> |
| CACNG1 | Calcium Voltage-Gated Channel Auxiliary Subunit Gamma 1              | Protein Coding | 48 | GC17P067044 | 0.342445672 | <a href="https://www.genecards.org/cgi-bin/carddisp.pl?gene=CACNG1">https://www.genecards.org/cgi-bin/carddisp.pl?gene=CACNG1</a> |
| P2RY4  | Pyrimidinergic Receptor P2Y4                                         | Protein Coding | 46 | GC0XM070258 | 0.340865254 | <a href="https://www.genecards.org/cgi-bin/carddisp.pl?gene=P2RY4">https://www.genecards.org/cgi-bin/carddisp.pl?gene=P2RY4</a>   |
| USH1C  | USH1 Protein Network Component Harmonin                              | Protein Coding | 50 | GC11M017665 | 0.334992945 | <a href="https://www.genecards.org/cgi-bin/carddisp.pl?gene=USH1C">https://www.genecards.org/cgi-bin/carddisp.pl?gene=USH1C</a>   |
| P2RY6  | Pyrimidinergic Receptor P2Y6                                         | Protein Coding | 48 | GC11P073264 | 0.310468733 | <a href="https://www.genecards.org/cgi-bin/carddisp.pl?gene=P2RY6">https://www.genecards.org/cgi-bin/carddisp.pl?gene=P2RY6</a>   |
| TRAK2  | Trafficking Kinesin Protein 2                                        | Protein Coding | 47 | GC02M201377 | 0.304976404 | <a href="https://www.genecards.org/cgi-bin/carddisp.pl?gene=TRAK2">https://www.genecards.org/cgi-bin/carddisp.pl?gene=TRAK2</a>   |
| MRGPRD | MAS Related GPR Family Member D                                      | Protein Coding | 43 | GC11M068980 | 0.288439035 | <a href="https://www.genecards.org/cgi-bin/carddisp.pl?gene=MRGPRD">https://www.genecards.org/cgi-bin/carddisp.pl?gene=MRGPRD</a> |

|         |                                                         |                    |    |             |             |                                                                                                                                     |
|---------|---------------------------------------------------------|--------------------|----|-------------|-------------|-------------------------------------------------------------------------------------------------------------------------------------|
| HBB-LCR | Beta-Globin Locus Control Region                        | Functional Element | 7  | GC11P005434 | 0.260074615 | <a href="https://www.genecards.org/cgi-bin/carddisp.pl?gene=HBB-LCR">https://www.genecards.org/cgi-bin/carddisp.pl?gene=HBB-LCR</a> |
| GRIPAP1 | GRIP1 Associated Protein 1                              | Protein Coding     | 41 | GC0XM048973 | 0.23853527  | <a href="https://www.genecards.org/cgi-bin/carddisp.pl?gene=GRIPAP1">https://www.genecards.org/cgi-bin/carddisp.pl?gene=GRIPAP1</a> |
| CACNG8  | Calcium Voltage-Gated Channel Auxiliary Subunit Gamma 8 | Protein Coding     | 43 | GC19P073470 | 0.237444133 | <a href="https://www.genecards.org/cgi-bin/carddisp.pl?gene=CACNG8">https://www.genecards.org/cgi-bin/carddisp.pl?gene=CACNG8</a>   |
| CACNG4  | Calcium Voltage-Gated Channel Auxiliary Subunit Gamma 4 | Protein Coding     | 48 | GC17P066964 | 0.223895937 | <a href="https://www.genecards.org/cgi-bin/carddisp.pl?gene=CACNG4">https://www.genecards.org/cgi-bin/carddisp.pl?gene=CACNG4</a>   |
| OR51E1  | Olfactory Receptor Family 51 Subfamily E Member 1       | Protein Coding     | 40 | GC11P004643 | 0.206530973 | <a href="https://www.genecards.org/cgi-bin/carddisp.pl?gene=OR51E1">https://www.genecards.org/cgi-bin/carddisp.pl?gene=OR51E1</a>   |
| PCDHGC3 | Protocadherin Gamma Subfamily C, 3                      | Protein Coding     | 45 | GC05P141475 | 0.183900505 | <a href="https://www.genecards.org/cgi-bin/carddisp.pl?gene=PCDHGC3">https://www.genecards.org/cgi-bin/carddisp.pl?gene=PCDHGC3</a> |
| CST2    | Cystatin SA                                             | Protein Coding     | 39 | GC20M023805 | 0.183900505 | <a href="https://www.genecards.org/cgi-bin/carddisp.pl?gene=CST2">https://www.genecards.org/cgi-bin/carddisp.pl?gene=CST2</a>       |
